# Supplementary material for: Adolescent exposure to Δ9-tetrahydrocannabinol alters the transcriptional trajectory and dendritic architecture of prefrontal pyramidal neurons
Source: Mol Psychiatry. 2018 Oct 3;24(4):588–600. doi: 10.1038/s41380-018-0243-x (PMC6430678; doi:10.1038/s41380-018-0243-x)
Supplement: Supplementary file 3 — Supplementary Table 1 [file 41380_2018_243_MOESM3_ESM.xlsx]

## Sheet: DGE-voom-limma
			Pyramidal vs. Non-pyramidal
Gene Name	Ensembl ID	AveExpr	log2FC	P.Value
Gad1	ENSRNOG00000000007	5.09344	2.61769	0.208072
Cbln1	ENSRNOG00000000010	0.318159	-2.39222	0.237534
Hebp1	ENSRNOG00000000024	3.27982	3.42834	0.163613
Tmcc2	ENSRNOG00000000033	2.27262	1.66292	0.430749
Klhdc8a	ENSRNOG00000000036	0.63611	3.36556	0.0743798
Xpr1	ENSRNOG00000000042	-0.624988	-0.829303	0.500235
Idua	ENSRNOG00000000043	2.28231	-0.387665	0.871239
Tmem175	ENSRNOG00000000044	0.613561	3.32372	0.0790535
Cd82	ENSRNOG00000000047	0.8115	-0.74976	0.718684
Gak	ENSRNOG00000000048	0.702476	3.49966	0.0617508
Crp	ENSRNOG00000000053	2.81739	1.02535	0.63611
Abhd8	ENSRNOG00000000054	4.87724	2.14525	0.345188
Cplx1	ENSRNOG00000000060	7.04802	1.04387	0.509204
Pcgf3	ENSRNOG00000000062	0.869332	2.09618	0.380065
Atp5i	ENSRNOG00000000064	2.08501	1.04357	0.671046
Fbxo28	ENSRNOG00000000066	0.396878	2.89163	0.111961
Ppp2r5a	ENSRNOG00000000068	5.88282	-4.95106	0.0224604
Mtf2	ENSRNOG00000000075	1.40431	0.812954	0.715252
Hltf	ENSRNOG00000000082	5.21067	-1.28437	0.602594
Gpr89b	ENSRNOG00000000095	3.26914	3.05317	0.186191
Rnf115	ENSRNOG00000000098	4.30715	2.77758	0.184147
Thoc3	ENSRNOG00000000104	3.61929	7.81218	0.000123903
Cplx2	ENSRNOG00000000105	4.00099	-2.41092	0.275336
Coprs	ENSRNOG00000000111	2.70964	-2.18503	0.441088
Champ1	ENSRNOG00000000112	0.789961	3.67495	0.0550712
Elac1	ENSRNOG00000000113	3.13343	-0.925111	0.670501
Ak2	ENSRNOG00000000122	1.0098	1.1894	0.616118
Rnf19b	ENSRNOG00000000123	1.30756	2.98654	0.144463
RGD1559864	ENSRNOG00000000129	1.87159	-3.36402	0.284419
Dnajb5	ENSRNOG00000000130	7.93073	-2.24498	0.149244
Txndc15	ENSRNOG00000000133	5.07891	-3.10835	0.195736
Dnajc1	ENSRNOG00000000150	-0.440747	-0.845981	0.501603
Atg12	ENSRNOG00000000157	8.63687	-4.53154	0.0134773
Cdo1	ENSRNOG00000000158	5.04341	0.124319	0.951367
Chm	ENSRNOG00000000161	1.53124	1.30572	0.555223
Lamp2	ENSRNOG00000000164	4.22083	-1.38414	0.556881
Alas2	ENSRNOG00000000167	0.902143	-5.38396	0.0109704
Gatm	ENSRNOG00000000168	7.82473	-2.63107	0.159384
Slc30a4	ENSRNOG00000000170	5.38715	2.31476	0.272767
Mier2	ENSRNOG00000000175	-0.0445062	-1.91654	0.199336
Tst	ENSRNOG00000000186	4.12874	-0.999389	0.663128
Ep300	ENSRNOG00000000190	-0.256505	-0.625799	0.642813
Gsta5	ENSRNOG00000000201	0.63611	-1.91724	0.34064
Syncrip	ENSRNOG00000000204	-0.624988	-0.70639	0.527432
Ano10	ENSRNOG00000000219	0.473091	3.0388	0.0976378
Lmf1	ENSRNOG00000000230	2.10404	2.44242	0.290962
Kctd17	ENSRNOG00000000231	3.3936	3.05948	0.243901
Grm6	ENSRNOG00000000233	0.0278705	2.16406	0.207702
Zfp207	ENSRNOG00000000236	2.76933	4.36635	0.115209
Coil	ENSRNOG00000000244	1.29954	4.66436	0.0596615
Slc16a6	ENSRNOG00000000245	3.5661	2.82406	0.308722
Amz2	ENSRNOG00000000246	6.3456	0.839618	0.62887
Mfsd11	ENSRNOG00000000247	5.41631	-2.38692	0.281578
Srsf2	ENSRNOG00000000248	8.53547	-2.63617	0.0618144
Mettl23	ENSRNOG00000000249	2.51159	5.43725	0.0122266
Jmjd6	ENSRNOG00000000250	0.139735	-2.0421	0.272045
Smpd3	ENSRNOG00000000257	1.72647	-1.72679	0.490119
Zfp821	ENSRNOG00000000262	2.24818	2.6679	0.257443
Def8	ENSRNOG00000000264	2.36661	6.77766	0.00200736
Phyhipl	ENSRNOG00000000274	5.23954	1.55607	0.464131
Prodh	ENSRNOG00000000281	1.67473	-5.37249	0.0114893
Sesn1	ENSRNOG00000000302	5.14695	-1.3699	0.519686
Cep57l1	ENSRNOG00000000303	3.73839	-4.52527	0.151237
Cd164	ENSRNOG00000000304	6.27781	-1.52192	0.388055
Zbtb24	ENSRNOG00000000308	4.12051	-1.71264	0.431115
Fig4	ENSRNOG00000000312	4.82608	-3.99134	0.124843
Sec63	ENSRNOG00000000314	3.10177	-2.23259	0.3259
Sobp	ENSRNOG00000000316	2.15974	6.40691	0.00152778
Cd24	ENSRNOG00000000321	7.58346	-1.69404	0.273173
Atg5	ENSRNOG00000000322	4.08433	-3.35868	0.207404
Hace1	ENSRNOG00000000327	3.64949	1.97074	0.353788
RGD1304704	ENSRNOG00000000340	6.99688	2.32713	0.206572
Grik2	ENSRNOG00000000368	1.91774	5.93466	0.00320753
Ctnna3	ENSRNOG00000000378	3.7315	1.56951	0.460361
Slc25a16	ENSRNOG00000000387	1.13883	1.81382	0.358633
Supv3l1	ENSRNOG00000000392	2.35245	4.27781	0.0558949
Srgn	ENSRNOG00000000394	3.51632	-4.72405	0.0493008
LOC606294	ENSRNOG00000000395	5.4119	5.6047	0.00990568
Ddx50	ENSRNOG00000000396	3.97147	2.6692	0.3184
Ccar1	ENSRNOG00000000397	3.6196	-0.605679	0.781278
Zufsp	ENSRNOG00000000398	1.72398	3.82071	0.0622561
Gopc	ENSRNOG00000000408	4.14739	0.634779	0.780757
Nus1	ENSRNOG00000000411	2.9044	6.38595	0.00129664
Slc35f1	ENSRNOG00000000412	5.40356	-1.25187	0.523406
Asf1a	ENSRNOG00000000415	1.92619	1.29882	0.585421
Numa1	ENSRNOG00000000417	4.18013	1.20265	0.577345
Nelfe	ENSRNOG00000000420	0.963911	0.126501	0.95911
LOC100360835	ENSRNOG00000000423	1.01323	-1.92	0.431545
Atf6b	ENSRNOG00000000431	8.41746	-2.11334	0.200843
Prrt1	ENSRNOG00000000433	5.8943	0.72645	0.695013
Ppt2	ENSRNOG00000000435	-0.440747	-0.401567	0.746745
Agpat1	ENSRNOG00000000437	4.6369	0.567642	0.790604
Rnf5	ENSRNOG00000000438	4.94014	-0.715756	0.853536
Ager	ENSRNOG00000000439	0.645697	-4.87513	0.0235701
Pbx2	ENSRNOG00000000440	6.49238	2.6685	0.156341
Tap1	ENSRNOG00000000457	1.42859	0.251543	0.906554
Col11a2	ENSRNOG00000000463	1.73035	0.737016	0.754617
Rxrb	ENSRNOG00000000464	3.34751	3.05142	0.219875
Slc39a7	ENSRNOG00000000465	3.97165	3.38739	0.301382
Hsd17b8	ENSRNOG00000000466	1.85733	4.2888	0.0297583
Ring1	ENSRNOG00000000467	2.21408	6.51234	0.00131785
Vps52	ENSRNOG00000000470	0.505902	0.0797514	0.968381
Pfdn6	ENSRNOG00000000473	1.19611	4.49085	0.0228232
Zbtb22	ENSRNOG00000000476	2.82455	-0.64573	0.807658
Daxx	ENSRNOG00000000477	4.31286	-3.74279	0.192952
Phf1	ENSRNOG00000000480	3.28716	-6.4207	0.0109838
Cuta	ENSRNOG00000000481	2.82758	4.53724	0.0206022
Syngap1	ENSRNOG00000000483	-0.31939	1.42162	0.344742
Rps10	ENSRNOG00000000490	1.23781	-2.18122	0.275045
Snrpc	ENSRNOG00000000493	1.94239	1.74946	0.445366
Anks1a	ENSRNOG00000000498	0.351734	-1.78937	0.357247
Zfp523	ENSRNOG00000000501	5.9462	0.373217	0.843625
Def6	ENSRNOG00000000502	0.97452	-3.95236	0.105779
Ppard	ENSRNOG00000000503	6.14975	-4.65694	0.0567996
Tead3	ENSRNOG00000000506	0.742592	3.57997	0.0570708
Srpk1	ENSRNOG00000000511	1.86905	5.86059	0.00474778
Slc26a8	ENSRNOG00000000512	-0.440747	1.2481	0.374376
Mapk14	ENSRNOG00000000513	6.70969	6.75695	0.00270577
Mapk13	ENSRNOG00000000515	3.22932	-0.230126	0.919799
Srsf3	ENSRNOG00000000520	6.9713	1.91573	0.248737
Cpne5	ENSRNOG00000000522	2.59898	3.30308	0.131241
Ppil1	ENSRNOG00000000523	0.436994	-2.68131	0.206319
RGD735065	ENSRNOG00000000524	1.24909	2.4805	0.320724
Pi16	ENSRNOG00000000525	-0.256505	-0.40557	0.76935
Mtch1	ENSRNOG00000000527	8.5459	1.94553	0.366507
Cmtr1	ENSRNOG00000000532	4.56999	4.01263	0.129339
Btbd9	ENSRNOG00000000540	4.63134	1.57844	0.51785
Glo1	ENSRNOG00000000541	6.08317	-0.430879	0.834875
Nt5dc1	ENSRNOG00000000546	2.31647	-3.40548	0.304992
Tspyl4	ENSRNOG00000000547	6.51412	2.18333	0.23063
Tspyl1	ENSRNOG00000000549	7.63335	-1.91997	0.212802
RGD1305587	ENSRNOG00000000551	2.28878	2.1869	0.352075
Sar1a	ENSRNOG00000000557	8.25016	1.05236	0.459076
Pald1	ENSRNOG00000000561	2.68646	-8.87389	0.000103849
Sgpl1	ENSRNOG00000000565	5.25673	6.24993	0.0239104
Unc5b	ENSRNOG00000000567	1.74378	-3.17437	0.137612
Slc29a3	ENSRNOG00000000568	1.52777	-2.65079	0.340384
MGC112715	ENSRNOG00000000569	2.56372	-3.38321	0.138182
Psap	ENSRNOG00000000571	11.7632	-1.55674	0.0677077
Anapc16	ENSRNOG00000000576	0.955994	1.42393	0.540944
Marcks	ENSRNOG00000000579	7.50556	-1.31174	0.375776
Cdc40	ENSRNOG00000000581	4.38678	5.7057	0.0173831
Cdk19	ENSRNOG00000000583	2.25233	-0.776305	0.797057
Amd1	ENSRNOG00000000585	6.9498	1.39759	0.38777
Gtf3c6	ENSRNOG00000000586	1.63406	0.880772	0.706971
Rpf2	ENSRNOG00000000587	2.201	1.48814	0.539376
Naglt1	ENSRNOG00000000590	2.61776	-2.24969	0.345536
Rev3l	ENSRNOG00000000593	3.63327	2.54148	0.361207
Fyn	ENSRNOG00000000596	9.24843	-2.61577	0.176199
Lama4	ENSRNOG00000000599	1.53507	-6.63371	0.00222963
Hdac2	ENSRNOG00000000604	3.80711	1.60524	0.453396
Hs3st5	ENSRNOG00000000605	0.861617	2.08035	0.382771
Ipmk	ENSRNOG00000000609	4.15635	4.19401	0.0840283
Cisd1	ENSRNOG00000000610	3.27069	4.53824	0.0410313
Ube2d1	ENSRNOG00000000611	1.48494	2.40831	0.246154
Tfam	ENSRNOG00000000613	1.71262	3.41514	0.0883683
Bicc1	ENSRNOG00000000614	0.351734	-1.56914	0.428267
Hint1-ps1	ENSRNOG00000000622	6.71334	-0.0150076	0.993374
Rhobtb1	ENSRNOG00000000633	1.34922	-4.73034	0.0239213
Zfp365	ENSRNOG00000000638	3.97068	1.39105	0.52059
Egr2	ENSRNOG00000000640	2.41529	6.97489	0.00155573
LOC100363472	ENSRNOG00000000641	2.47636	2.12741	0.376715
Reep3	ENSRNOG00000000645	4.35442	-4.56627	0.0540565
Jmjd1c	ENSRNOG00000000648	6.52559	2.02547	0.268675
Hps4	ENSRNOG00000000661	1.4408	1.80535	0.504655
Srrd	ENSRNOG00000000662	0.880604	-3.18388	0.19862
Tfip11	ENSRNOG00000000663	1.10473	0.454729	0.83381
Tpst2	ENSRNOG00000000664	1.40083	0.233671	0.913356
Pitpnb	ENSRNOG00000000665	2.43929	1.82871	0.466666
Svop	ENSRNOG00000000693	3.24616	1.36246	0.559167
Coro1c	ENSRNOG00000000697	2.46997	-1.03683	0.729617
Tmem119	ENSRNOG00000000700	3.19053	-8.36818	0.000159739
Iscu	ENSRNOG00000000701	4.95773	2.54042	0.280985
Sart3	ENSRNOG00000000702	1.10473	4.31214	0.0333693
Sgsm1	ENSRNOG00000000708	4.11002	7.65119	0.000306938
Cggbp1	ENSRNOG00000000718	4.07265	-2.21048	0.319506
RT1-CE5	ENSRNOG00000000723	3.29308	-7.19454	0.00284452
Tmlhe	ENSRNOG00000000729	1.38014	-4.70509	0.0266583
RT1-M3-1	ENSRNOG00000000763	1.58508	3.5537	0.0957953
Gabbr1	ENSRNOG00000000774	9.10567	-0.822433	0.648821
Mog	ENSRNOG00000000775	2.38496	3.49445	0.144893
RT1-S3	ENSRNOG00000000777	5.02451	-3.77147	0.165673
Znrd1as1	ENSRNOG00000000778	0.495293	-2.90624	0.171672
Znrd1	ENSRNOG00000000779	4.54327	0.690912	0.744137
Ppp1r11	ENSRNOG00000000780	4.93716	1.87687	0.485941
Trim39	ENSRNOG00000000785	1.73419	3.8343	0.0646703
Ranbp2	ENSRNOG00000000796	5.03774	-0.400987	0.85714
Gnl1	ENSRNOG00000000798	1.83398	0.584844	0.789047
Abcf1	ENSRNOG00000000799	3.84442	0.912635	0.677772
Man1a1	ENSRNOG00000000800	0.465376	3.03222	0.113112
Mrps18b	ENSRNOG00000000804	4.5123	1.37813	0.51159
Gja1	ENSRNOG00000000805	9.067	-3.95701	0.00814379
Hsf2	ENSRNOG00000000808	4.12318	2.49363	0.379668
Atat1	ENSRNOG00000000809	3.72745	0.490158	0.834074
Fabp7	ENSRNOG00000000814	4.05473	-3.9962	0.071229
Smpdl3a	ENSRNOG00000000815	2.12307	-7.77783	0.000452213
Ppp1r18	ENSRNOG00000000816	0.572531	-4.706	0.0282803
Nrm	ENSRNOG00000000818	0.149227	-1.57199	0.389865
Dse	ENSRNOG00000000824	1.99081	-5.92374	0.00688142
Flot1	ENSRNOG00000000826	3.69668	2.17288	0.351916
Ier3	ENSRNOG00000000827	-0.624988	-0.829303	0.500235
Gtf2h4	ENSRNOG00000000831	-0.228748	-1.29487	0.365088
Vars2	ENSRNOG00000000833	2.22581	2.45459	0.298661
Atp6v1g2	ENSRNOG00000000840	7.38714	1.33701	0.412179
Ddx39b	ENSRNOG00000000841	8.09267	1.0927	0.465632
Csnk2b	ENSRNOG00000000847	5.11917	-1.82088	0.430421
Bag6	ENSRNOG00000000851	6.1662	-1.03051	0.565192
Prrc2a	ENSRNOG00000000852	4.37181	4.01229	0.0826893
Aif1	ENSRNOG00000000853	1.06038	-5.673	0.0111554
Ncr3	ENSRNOG00000000854	2.91829	0.271541	0.901733
Zic3	ENSRNOG00000000861	1.76816	-7.10391	0.00114484
Rbmx	ENSRNOG00000000866	1.06485	2.11754	0.266517
Vars	ENSRNOG00000000867	0.90676	3.90895	0.0418852
Cd40lg	ENSRNOG00000000871	-0.440747	-0.401567	0.746745
Fhl1	ENSRNOG00000000875	5.50092	4.78583	0.0884047
Slc9a6	ENSRNOG00000000879	4.00168	4.98392	0.035569
Mmgt1	ENSRNOG00000000881	0.97736	0.39557	0.868138
Auts2	ENSRNOG00000000885	0.594993	0.57013	0.796075
Caln1	ENSRNOG00000000886	0.21732	2.5145	0.176079
Sbds	ENSRNOG00000000888	2.08931	0.842745	0.705883
Fry	ENSRNOG00000000894	7.14599	-0.371294	0.808655
Rabgef1	ENSRNOG00000000895	2.3123	4.94705	0.0264983
Tpst1	ENSRNOG00000000900	2.80236	0.601282	0.839578
Crcp	ENSRNOG00000000901	6.05933	-3.71174	0.0938773
Hsph1	ENSRNOG00000000902	3.67487	5.31092	0.0201
Asl	ENSRNOG00000000903	0.346351	2.79275	0.125191
Tex26	ENSRNOG00000000905	-0.440747	-0.60912	0.646801
Medag	ENSRNOG00000000906	0.874385	3.84342	0.0439884
Uspl1	ENSRNOG00000000909	1.57497	5.21797	0.0130488
Zbed5	ENSRNOG00000000918	1.49898	-0.873117	0.742825
Ubl3	ENSRNOG00000000921	6.78178	1.53187	0.394852
Sumf2	ENSRNOG00000000922	0.661884	3.4197	0.0702983
Cct6a	ENSRNOG00000000923	4.98969	1.52797	0.454281
Slc7a1	ENSRNOG00000000924	3.89959	-5.90886	0.022493
Psph	ENSRNOG00000000925	4.54893	-3.21234	0.215124
Mrps17	ENSRNOG00000000926	1.84127	-0.920508	0.723911
Sfswap	ENSRNOG00000000931	2.50511	4.45685	0.0335015
Piwil1	ENSRNOG00000000934	3.37496	0.481111	0.837783
Stx2	ENSRNOG00000000936	1.77214	0.468601	0.845163
Slc46a3	ENSRNOG00000000937	1.46109	3.50722	0.0727703
Ran	ENSRNOG00000000938	7.14677	-0.151587	0.941569
Flt1	ENSRNOG00000000940	0.63611	-4.85261	0.0181233
Rpo1-3	ENSRNOG00000000954	0.657333	3.4081	0.0718485
Lnx2	ENSRNOG00000000955	5.87134	-0.866693	0.741324
Rasl11a	ENSRNOG00000000956	4.90564	1.57772	0.434281
LOC100361103	ENSRNOG00000000957	4.79618	-1.90626	0.361186
Glt1d1	ENSRNOG00000000961	-0.0445062	-1.42328	0.401175
Slc15a4	ENSRNOG00000000962	3.04916	3.51959	0.087334
Aacs	ENSRNOG00000000967	0.865495	3.82633	0.048946
Rnf6	ENSRNOG00000000968	0.498865	3.09676	0.0993809
Zfp358	ENSRNOG00000000974	-0.0445062	-1.64351	0.324458
Mcoln1	ENSRNOG00000000975	1.9487	2.05937	0.364212
Pnpla6	ENSRNOG00000000977	1.16999	-0.742152	0.754661
Bri3bp	ENSRNOG00000000979	0.0407531	0.521038	0.757589
Scarb1	ENSRNOG00000000981	0.926833	1.38428	0.479863
Zfp394	ENSRNOG00000000983	2.77331	-5.43631	0.0517701
Cpsf4	ENSRNOG00000000985	2.10788	0.452154	0.858445
Camsap3	ENSRNOG00000000986	0.0881225	2.26184	0.192245
Ptcd1	ENSRNOG00000000987	1.52219	1.97089	0.371172
Xab2	ENSRNOG00000000988	1.81683	-2.53988	0.298148
Bud31	ENSRNOG00000000989	5.79285	0.500952	0.816503
Pdap1	ENSRNOG00000000990	2.61882	2.45674	0.3195
Arpc1b	ENSRNOG00000000991	2.0968	-8.00307	0.00374427
Arpc1a	ENSRNOG00000000996	7.04585	0.866539	0.583962
Smurf1	ENSRNOG00000000999	2.52283	-3.5695	0.14572
Trappc5	ENSRNOG00000001003	5.25732	-3.40501	0.221373
Ncor2	ENSRNOG00000001004	3.52462	-3.4855	0.161762
Nptx2	ENSRNOG00000001006	1.45487	2.34657	0.300406
Bri3	ENSRNOG00000001009	1.08218	4.25842	0.0284109
Tecpr1	ENSRNOG00000001010	1.555	-2.92108	0.206084
Tsc22d1	ENSRNOG00000001030	10.1017	0.808616	0.492212
Ccz1b	ENSRNOG00000001032	5.64877	1.46166	0.553918
Nufip1	ENSRNOG00000001033	3.02209	1.24539	0.568215
Evi5l	ENSRNOG00000001034	0.461456	1.35001	0.536688
Gtf2h3	ENSRNOG00000001035	1.63619	5.374	0.00751117
Gpalpp1	ENSRNOG00000001037	0.318159	2.74458	0.156876
Eif2b1	ENSRNOG00000001039	3.67365	-1.61058	0.661964
Pms2	ENSRNOG00000001040	0.484363	0.874029	0.664196
Ddx55	ENSRNOG00000001043	2.70207	1.87444	0.491628
Aimp2	ENSRNOG00000001044	2.07544	2.3565	0.240742
Tpt1	ENSRNOG00000001049	8.00648	-0.72953	0.591351
Eif2ak1	ENSRNOG00000001050	2.13662	-2.32173	0.311427
Slc25a30	ENSRNOG00000001052	0.589507	3.27918	0.115102
Tmed2	ENSRNOG00000001053	7.36009	1.11485	0.467256
Rilpl1	ENSRNOG00000001055	5.52442	-0.129803	0.949128
Snapc2	ENSRNOG00000001056	5.41614	-5.60733	0.0115715
Ctxn1	ENSRNOG00000001057	5.12608	1.10216	0.574086
Timm44	ENSRNOG00000001058	2.83469	0.437069	0.845912
Usp42	ENSRNOG00000001059	1.33551	4.78724	0.0306716
Snrnp35	ENSRNOG00000001060	0.0768506	-1.79057	0.315648
Rilpl2	ENSRNOG00000001061	5.25412	-1.34985	0.67035
Sbno1	ENSRNOG00000001064	4.8381	1.69228	0.472727
Cyth3	ENSRNOG00000001065	4.89486	2.753	0.261053
Rac1	ENSRNOG00000001068	7.43737	5.13957	0.0101302
Elavl1	ENSRNOG00000001069	2.34045	1.95561	0.413207
Cdk2ap1	ENSRNOG00000001070	5.8756	0.930091	0.611385
Cers4	ENSRNOG00000001072	0.306235	-0.927921	0.624481
RGD1563482	ENSRNOG00000001073	7.91702	0.032378	0.981085
Daglb	ENSRNOG00000001079	3.26813	0.399378	0.856792
Arl6ip4	ENSRNOG00000001080	4.45554	4.31226	0.0750303
Ogfod2	ENSRNOG00000001081	1.24597	-2.84931	0.236953
Abcb9	ENSRNOG00000001082	3.89565	-1.2258	0.593545
Kdelr2	ENSRNOG00000001083	5.03394	1.83326	0.379044
Vps37b	ENSRNOG00000001086	3.24798	2.0194	0.475801
Stard13	ENSRNOG00000001090	0.351734	-4.27669	0.0263899
Hip1r	ENSRNOG00000001091	2.97156	3.78625	0.107307
Pds5b	ENSRNOG00000001098	7.83463	0.914245	0.599021
Rbak	ENSRNOG00000001099	1.24909	-0.445844	0.869204
Rnf216	ENSRNOG00000001101	2.51019	1.11133	0.603345
Denr	ENSRNOG00000001106	1.93312	4.4848	0.0432487
N4bp2l2	ENSRNOG00000001108	1.82734	3.08519	0.151533
Brca2	ENSRNOG00000001111	-0.440747	-2.67203	0.0707974
Mmd2	ENSRNOG00000001113	9.3874	-3.03772	0.0242435
Wipi2	ENSRNOG00000001114	2.44764	5.47627	0.00547082
Slc29a4	ENSRNOG00000001115	1.58612	-2.53633	0.391911
Med13l	ENSRNOG00000001120	4.05602	4.80936	0.0453223
Rnft2	ENSRNOG00000001124	4.53827	5.12854	0.0520257
Fbxw8	ENSRNOG00000001126	3.58286	3.79904	0.0752578
Tesc	ENSRNOG00000001128	0.768739	2.11936	0.240075
Rfc5	ENSRNOG00000001134	3.66175	-2.90325	0.206332
Wsb2	ENSRNOG00000001135	6.13862	-4.60974	0.0345511
Pebp1	ENSRNOG00000001136	6.76496	1.98477	0.259924
Taok3	ENSRNOG00000001138	4.7307	5.14804	0.0387672
Suds3	ENSRNOG00000001139	4.55394	3.55967	0.167941
Cit	ENSRNOG00000001143	2.00369	2.01363	0.390994
Rplp0	ENSRNOG00000001148	5.58254	-1.02109	0.583795
Pxn	ENSRNOG00000001149	4.20622	-2.00008	0.452138
Msi1	ENSRNOG00000001156	2.48462	4.40654	0.0351601
Abcg1	ENSRNOG00000001158	7.42617	0.253349	0.881517
LOC100910137	ENSRNOG00000001160	1.48053	2.49944	0.215928
Gatc	ENSRNOG00000001161	5.65855	-0.0414175	0.982564
Srsf9	ENSRNOG00000001163	2.42316	0.477761	0.869307
Slc37a1	ENSRNOG00000001169	0.21732	-2.13873	0.268138
Cox6a1	ENSRNOG00000001170	5.8348	-0.841238	0.672742
Rnf10	ENSRNOG00000001172	5.08096	1.0066	0.621986
Cabp1	ENSRNOG00000001173	2.32594	2.38408	0.306547
Pde9a	ENSRNOG00000001174	3.14313	1.21065	0.671124
Sppl3	ENSRNOG00000001178	7.02182	-1.46999	0.364433
Ndufv3	ENSRNOG00000001182	3.48572	-0.246408	0.924498
Pknox1	ENSRNOG00000001184	1.79238	5.63532	0.00941891
RGD1311899	ENSRNOG00000001185	9.57609	0.950999	0.56212
Oasl	ENSRNOG00000001187	2.88481	-0.227594	0.916637
Sik1	ENSRNOG00000001189	6.4102	-1.29536	0.447413
Git2	ENSRNOG00000001190	5.08115	-0.0630152	0.97637
Gltp	ENSRNOG00000001192	6.8872	0.666226	0.71542
Rrp1b	ENSRNOG00000001194	3.7125	0.891629	0.738427
Cstb	ENSRNOG00000001201	2.09237	6.28183	0.0018406
Rrp1	ENSRNOG00000001203	1.09872	-4.14102	0.0455049
Ankrd13a	ENSRNOG00000001204	3.12346	-3.92592	0.115669
Agpat3	ENSRNOG00000001205	5.45115	1.42346	0.498307
Pwp2	ENSRNOG00000001210	0.563734	3.2245	0.0855074
RGD1303003	ENSRNOG00000001211	4.78325	1.08443	0.591874
Pfkl	ENSRNOG00000001214	4.42975	0.817739	0.709991
RGD1309594	ENSRNOG00000001215	2.38572	3.7193	0.0923385
Ube2g2	ENSRNOG00000001222	4.15597	-0.532888	0.836238
Pttg1ip	ENSRNOG00000001223	5.52001	-8.46472	0.00445317
Itgb2	ENSRNOG00000001224	2.75125	-1.26479	0.686759
Fam207a	ENSRNOG00000001225	2.84153	-0.218543	0.91975
Adarb1	ENSRNOG00000001227	4.21672	1.6233	0.511122
Slc19a1	ENSRNOG00000001232	-0.624988	-0.913943	0.44715
Gna12	ENSRNOG00000001235	5.70874	-4.22338	0.0453497
Brat1	ENSRNOG00000001236	4.06236	4.62036	0.0624734
Cabin1	ENSRNOG00000001237	5.54735	3.29937	0.0969769
Rsrc2	ENSRNOG00000001238	6.15384	-0.491659	0.803068
Ddt	ENSRNOG00000001239	4.69596	4.54289	0.0491762
Gstt3	ENSRNOG00000001242	0.522918	-1.97494	0.376038
Zcchc8	ENSRNOG00000001243	1.48053	-0.575879	0.779333
Pcbp3	ENSRNOG00000001245	0.679535	3.45164	0.081952
Clip1	ENSRNOG00000001247	5.30545	3.58351	0.113559
Chst12	ENSRNOG00000001252	0.300122	2.69762	0.131471
Eif3b	ENSRNOG00000001253	2.86158	1.08607	0.646116
Atxn2	ENSRNOG00000001256	7.14956	0.613989	0.696495
Snx8	ENSRNOG00000001258	-0.135149	1.83675	0.258578
Cux2	ENSRNOG00000001259	0.880604	2.35112	0.245947
Ppp1cc	ENSRNOG00000001269	10.9504	-2.19351	0.0335725
Card6	ENSRNOG00000001271	1.54751	-0.583437	0.817129
Mcm3ap	ENSRNOG00000001272	1.06485	4.2225	0.0300274
Psmg3	ENSRNOG00000001273	3.97711	0.515537	0.863759
Vps29	ENSRNOG00000001274	5.41558	3.22868	0.107137
Pcnt	ENSRNOG00000001276	1.99318	3.5047	0.134314
Mafk	ENSRNOG00000001277	3.19098	-2.50831	0.370647
Gpn3	ENSRNOG00000001278	1.08638	0.225333	0.90982
Anapc7	ENSRNOG00000001283	4.51369	1.37957	0.673288
Atp2a2	ENSRNOG00000001285	9.52724	0.648636	0.574325
LOC498154	ENSRNOG00000001289	1.56935	5.19246	0.0202037
Get4	ENSRNOG00000001293	6.65721	2.26181	0.219638
Ift81	ENSRNOG00000001294	-0.0961189	0.254495	0.869708
S100b	ENSRNOG00000001295	9.93304	-3.55253	0.00812504
Prmt2	ENSRNOG00000001297	2.34919	2.07517	0.384059
Sun1	ENSRNOG00000001299	5.85343	0.63378	0.781499
P2rx4	ENSRNOG00000001300	1.83704	-4.62394	0.11959
Adora2a	ENSRNOG00000001302	3.44623	-4.36603	0.102666
Specc1l	ENSRNOG00000001303	3.85517	5.85158	0.0110101
Bcr	ENSRNOG00000001304	1.17493	4.45642	0.0328529
Camkk2	ENSRNOG00000001309	2.63595	1.56304	0.54721
Rab36	ENSRNOG00000001311	3.414	-0.277723	0.923157
Pdgfa	ENSRNOG00000001312	2.22403	3.37438	0.119311
Gnaz	ENSRNOG00000001313	1.74848	5.5827	0.00558434
Fam20c	ENSRNOG00000001314	3.7095	3.08664	0.219344
Anapc5	ENSRNOG00000001316	4.25988	-0.198555	0.934061
Zfp68	ENSRNOG00000001317	3.40976	3.21911	0.220149
Zfp157	ENSRNOG00000001323	0.109662	0.668227	0.703729
Il3ra	ENSRNOG00000001325	0.0768506	-0.43036	0.791434
Rnf34	ENSRNOG00000001331	3.30167	4.31672	0.0543408
Psmd9	ENSRNOG00000001339	3.3353	-1.57683	0.483631
Aldh2	ENSRNOG00000001344	2.25968	-2.39171	0.294904
Mapkapk5	ENSRNOG00000001345	1.30376	4.70522	0.0174548
Cops6	ENSRNOG00000001346	5.44187	-1.41514	0.460839
AABR07036374.1	ENSRNOG00000001347	1.13153	4.36302	0.0276178
Erp29	ENSRNOG00000001348	2.48555	-0.462453	0.871307
Mcm7	ENSRNOG00000001349	1.26811	-4.46741	0.108616
Naa25	ENSRNOG00000001350	2.72307	4.92749	0.0334055
Trafd1	ENSRNOG00000001351	2.67366	3.06169	0.204469
Hectd4	ENSRNOG00000001352	0.932216	0.759352	0.692055
Taf6	ENSRNOG00000001355	3.0699	1.28969	0.559128
Mblac1	ENSRNOG00000001357	1.0926	2.56128	0.251231
Rasal1	ENSRNOG00000001374	1.08218	4.25842	0.0284109
Mettl7a	ENSRNOG00000001376	3.38987	-4.44978	0.0788545
Plbd2	ENSRNOG00000001385	1.97246	-1.27115	0.563486
LOC100910540	ENSRNOG00000001387	2.10267	0.656895	0.793881
Agfg2	ENSRNOG00000001404	5.24555	2.53916	0.381013
Actl6b	ENSRNOG00000001408	2.28428	2.76406	0.19855
Gnb2	ENSRNOG00000001409	7.03627	-0.947725	0.551657
Gigyf1	ENSRNOG00000001410	1.8204	5.73346	0.00433164
Serpine1	ENSRNOG00000001414	-0.31939	-2.87986	0.0686313
Ap1s1	ENSRNOG00000001415	8.207	-1.26199	0.445242
LOC100909521	ENSRNOG00000001416	0.0768506	-0.515611	0.757636
Znhit1	ENSRNOG00000001418	2.10454	0.87245	0.723257
Cldn15	ENSRNOG00000001419	4.28319	1.2348	0.551808
Fis1	ENSRNOG00000001420	3.49104	5.26685	0.0348248
Prkrip1	ENSRNOG00000001426	5.22571	0.953404	0.708876
Orai2	ENSRNOG00000001427	5.14376	1.11203	0.571206
Alkbh4	ENSRNOG00000001428	3.97684	0.890924	0.815797
Lrwd1	ENSRNOG00000001429	1.07649	4.25084	0.0298479
Polr2j	ENSRNOG00000001430	3.23413	-2.60765	0.385484
Ywhag	ENSRNOG00000001436	9.88451	0.0841705	0.93353
RGD1307391	ENSRNOG00000001439	2.84992	-0.229988	0.916409
Mdh2	ENSRNOG00000001440	9.66809	0.186046	0.862655
Por	ENSRNOG00000001442	2.5772	1.39352	0.580926
Rhbdd2	ENSRNOG00000001443	1.14243	4.37081	0.0316484
Hip1	ENSRNOG00000001448	5.20989	-6.99952	0.00674012
Pom121	ENSRNOG00000001449	2.38602	6.88069	0.000762515
Fzd9	ENSRNOG00000001452	0.351734	-4.31439	0.040285
Baz1b	ENSRNOG00000001453	5.38238	2.50363	0.203486
Eif4h	ENSRNOG00000001454	5.00546	3.33793	0.104181
Kif13a	ENSRNOG00000001455	2.8586	-2.03831	0.39306
Nup153	ENSRNOG00000001456	0.95298	1.34441	0.502683
Rfc2	ENSRNOG00000001457	2.44917	4.08078	0.0597938
Limk1	ENSRNOG00000001470	-0.31939	1.50377	0.322884
Gtf2i	ENSRNOG00000001479	9.47424	0.27003	0.873397
Ncf1	ENSRNOG00000001480	4.37454	-0.681268	0.746913
Gtf2ird2	ENSRNOG00000001482	-0.624988	0.853014	0.4932
Wbscr16	ENSRNOG00000001483	4.6123	-0.483803	0.831183
Psmb1	ENSRNOG00000001488	6.85296	-0.13281	0.949691
Tbp	ENSRNOG00000001489	4.01717	2.80235	0.301663
Pdcd2	ENSRNOG00000001490	1.77078	4.12392	0.0350099
Slc8a2	ENSRNOG00000001492	2.19654	4.35894	0.0374877
Kptn	ENSRNOG00000001493	1.83643	3.21868	0.130102
Napa	ENSRNOG00000001494	6.26409	-2.35495	0.202671
Rab4b	ENSRNOG00000001500	3.05685	3.10564	0.155953
Snrpa	ENSRNOG00000001501	2.19315	4.37034	0.0316418
Tmem35	ENSRNOG00000001506	6.4133	2.14059	0.331464
Rapgef4	ENSRNOG00000001516	4.30989	-2.18335	0.380919
Pdk1	ENSRNOG00000001517	1.7995	3.58128	0.0783577
Itga6	ENSRNOG00000001518	4.7998	-3.94979	0.0929458
Dlx1	ENSRNOG00000001520	0.535976	-2.41173	0.287619
Hat1	ENSRNOG00000001524	4.7249	-3.42085	0.233897
Igsf11	ENSRNOG00000001525	5.05404	-2.89813	0.239415
Cd80	ENSRNOG00000001527	2.30518	1.2755	0.553746
Gap43	ENSRNOG00000001528	4.57391	5.90113	0.0159808
Chac2	ENSRNOG00000001531	2.52155	-1.74521	0.431264
Cyyr1	ENSRNOG00000001544	2.23261	-8.11075	0.000357157
Nfe2l2	ENSRNOG00000001548	2.96662	-3.437	0.143559
Atp5j	ENSRNOG00000001551	4.6332	-0.589085	0.781103
Btg3	ENSRNOG00000001555	3.3936	1.42409	0.598758
Mtx2	ENSRNOG00000001559	2.20024	6.47406	0.00159103
Usp25	ENSRNOG00000001573	3.15594	0.319585	0.889151
Nrip1	ENSRNOG00000001585	1.49964	2.43815	0.240888
Cct8	ENSRNOG00000001592	5.20737	1.19313	0.548396
Atp5g3	ENSRNOG00000001596	5.43839	0.985055	0.620474
Atf2	ENSRNOG00000001597	0.0278705	-1.80169	0.30097
Usp16	ENSRNOG00000001598	2.64766	-0.152621	0.950989
Ltn1	ENSRNOG00000001602	4.63688	2.5925	0.280486
N6amt1	ENSRNOG00000001603	0.586733	0.0147376	0.994658
Adamts1	ENSRNOG00000001607	0.0768506	-3.74787	0.0415403
Nxpe3	ENSRNOG00000001608	0.139735	2.39627	0.194046
Cep97	ENSRNOG00000001609	-0.440747	-0.181338	0.887197
Rpl24	ENSRNOG00000001611	2.74952	-0.35229	0.876692
Zbtb11	ENSRNOG00000001613	4.80719	2.61299	0.237316
Senp7	ENSRNOG00000001616	4.83233	5.86336	0.0114796
C2cd2	ENSRNOG00000001621	-0.624988	0.853014	0.4932
Zfp295	ENSRNOG00000001623	4.01886	4.14517	0.0492867
Pcp4	ENSRNOG00000001628	3.261	0.98419	0.687222
Wrb	ENSRNOG00000001629	2.5214	1.37491	0.612326
Brwd1	ENSRNOG00000001632	4.65632	-1.79924	0.501206
Tfg	ENSRNOG00000001633	4.43516	0.552194	0.810187
Tbc1d23	ENSRNOG00000001642	8.76098	-0.449501	0.722276
Psmg1	ENSRNOG00000001643	1.33551	4.7427	0.0346642
Filip1l	ENSRNOG00000001645	0.469254	-0.861818	0.663695
Ets2	ENSRNOG00000001647	3.96271	1.67076	0.429444
St3gal6	ENSRNOG00000001653	2.08039	-6.18887	0.00417377
Cpox	ENSRNOG00000001654	2.93546	-0.949995	0.662503
Cldnd1	ENSRNOG00000001657	5.77888	2.44819	0.208327
Dyrk1a	ENSRNOG00000001662	3.03575	1.89528	0.476941
Dscr3	ENSRNOG00000001681	1.73175	2.90588	0.168784
Ttc3	ENSRNOG00000001682	9.20334	0.360069	0.793511
Arl6	ENSRNOG00000001689	3.61142	3.79325	0.0755398
Setd4	ENSRNOG00000001699	1.33411	0.910534	0.678407
Dfnb31	ENSRNOG00000001700	2.12487	0.148034	0.955986
Kalrn	ENSRNOG00000001706	3.30527	4.78101	0.0345407
Dvl3	ENSRNOG00000001708	3.27249	1.78619	0.52123
Ap2m1	ENSRNOG00000001709	8.06235	1.49032	0.300304
Abcf3	ENSRNOG00000001710	1.16498	4.41387	0.0330226
Hrasls	ENSRNOG00000001711	4.6268	1.79958	0.478251
Alg3	ENSRNOG00000001712	1.35917	2.70578	0.176389
AABR07034532.1	ENSRNOG00000001713	-0.624988	-2.37709	0.0746856
Opa1	ENSRNOG00000001717	-0.440747	-0.930622	0.448522
Psmd2	ENSRNOG00000001719	7.91087	1.20567	0.578571
Hes1	ENSRNOG00000001720	3.31183	-0.447458	0.868428
Tmem44	ENSRNOG00000001726	1.16999	4.43221	0.0238369
Lsg1	ENSRNOG00000001727	1.20774	-2.76737	0.245757
Fam43a	ENSRNOG00000001728	0.149227	-0.0185561	0.991441
Acap2	ENSRNOG00000001730	1.89477	5.86562	0.00397487
Ppp1r2	ENSRNOG00000001733	5.53674	0.315844	0.877846
Bdh1	ENSRNOG00000001736	1.20923	2.79147	0.191628
Eif4g1	ENSRNOG00000001738	0.300122	-0.822179	0.653424
Mfi2	ENSRNOG00000001739	-0.624988	0.853014	0.4932
Ncbp2	ENSRNOG00000001746	2.44874	3.39614	0.129342
Pak2	ENSRNOG00000001747	4.4013	3.71324	0.0778181
LOC100912534	ENSRNOG00000001748	2.32173	4.17685	0.0457315
Chrd	ENSRNOG00000001750	3.92233	-1.03484	0.649526
Nrros	ENSRNOG00000001752	1.97868	-4.29311	0.10012
Wdr53	ENSRNOG00000001754	3.95662	6.13108	0.0148511
Tm4sf19	ENSRNOG00000001757	1.54046	-1.22835	0.586382
Tctex1d2	ENSRNOG00000001758	5.80109	-0.503843	0.786332
Pcyt1a	ENSRNOG00000001762	6.43574	-1.43676	0.430832
Vps8	ENSRNOG00000001764	2.87001	2.62563	0.263516
Tfrc	ENSRNOG00000001766	6.15791	-2.97731	0.131059
Tnk2	ENSRNOG00000001769	3.95999	-3.38157	0.261042
Ehhadh	ENSRNOG00000001770	2.8502	0.104649	0.961679
Senp2	ENSRNOG00000001773	1.73833	2.3394	0.3932
Lrch3	ENSRNOG00000001774	0.948922	-2.61579	0.304525
Lmln	ENSRNOG00000001781	1.84222	-0.0475376	0.982247
Osbpl11	ENSRNOG00000001782	1.8183	0.306861	0.887942
Tra2b	ENSRNOG00000001783	6.30645	-1.41984	0.41957
Etv5	ENSRNOG00000001785	4.60628	4.44985	0.0471846
Snx4	ENSRNOG00000001786	3.22176	2.21675	0.325237
Zfp148	ENSRNOG00000001789	4.49342	2.476	0.286354
Itgb5	ENSRNOG00000001795	3.33788	1.03392	0.642384
Dgkg	ENSRNOG00000001796	3.01416	1.6419	0.544919
Umps	ENSRNOG00000001797	0.569622	3.23493	0.0805663
Dnajb11	ENSRNOG00000001803	4.251	2.73325	0.243994
Sspn	ENSRNOG00000001807	4.09991	-5.65407	0.0259677
Fgfr1op2	ENSRNOG00000001811	7.64782	-3.66764	0.0608779
Dnm1l	ENSRNOG00000001813	0.351734	0.109248	0.952235
Eif4a2	ENSRNOG00000001815	9.20597	0.161742	0.894815
Rfc4	ENSRNOG00000001816	1.15127	0.257735	0.918426
Tm7sf3	ENSRNOG00000001817	2.08702	6.23667	0.00281898
Med21	ENSRNOG00000001820	1.21659	0.211892	0.92478
Adipoq	ENSRNOG00000001821	1.94915	0.359881	0.866859
St6gal1	ENSRNOG00000001823	0.95298	-3.04155	0.141015
Stk38l	ENSRNOG00000001828	3.5698	3.72645	0.126798
Ube2v2	ENSRNOG00000001829	2.87149	3.93151	0.0547315
Mzt2b	ENSRNOG00000001834	0.473091	3.04395	0.0988691
Sst	ENSRNOG00000001837	1.1501	0.453661	0.834166
Mrps35	ENSRNOG00000001842	4.76628	-0.527462	0.796309
Bcl6	ENSRNOG00000001843	-0.440747	-0.60912	0.646801
Top3b	ENSRNOG00000001845	6.51416	-0.953922	0.601178
Ccdc91	ENSRNOG00000001847	3.30331	-2.92491	0.219614
Far2	ENSRNOG00000001851	3.6487	5.30638	0.0196428
Ergic2	ENSRNOG00000001852	6.451	-0.0334004	0.990547
Sdf2l1	ENSRNOG00000001859	1.43739	-6.50544	0.00469231
Ydjc	ENSRNOG00000001861	-0.135149	1.83675	0.258578
Ube2l3	ENSRNOG00000001862	6.32999	-0.874115	0.634365
Tmem191c	ENSRNOG00000001864	0.0278705	2.16406	0.207702
Snap29	ENSRNOG00000001867	8.12944	-2.08802	0.164353
Lztr1	ENSRNOG00000001870	2.13043	-1.18309	0.677842
Slc7a4	ENSRNOG00000001874	0.0768506	2.24712	0.190605
Smpd4	ENSRNOG00000001875	2.89248	6.39757	0.0019168
Klhl22	ENSRNOG00000001878	2.95935	4.58779	0.0428346
Dgcr6	ENSRNOG00000001880	2.83191	0.652843	0.810444
RGD1565297	ENSRNOG00000001884	4.17488	0.25052	0.905799
Dgcr8	ENSRNOG00000001886	1.00459	4.11472	0.0699889
Arvcf	ENSRNOG00000001888	0.449432	1.53605	0.45985
Comt	ENSRNOG00000001889	1.60745	1.37471	0.543686
AABR07034742.1	ENSRNOG00000001893	7.11555	0.0615374	0.970343
Map6d1	ENSRNOG00000001911	0.281135	2.64388	0.161976
Tp63	ENSRNOG00000001924	-0.624988	-2.37709	0.0746856
Il1rap	ENSRNOG00000001928	3.13253	2.56231	0.258553
Fgf12	ENSRNOG00000001931	2.29675	1.61347	0.540825
Dzip3	ENSRNOG00000001956	0.820352	2.22063	0.220693
Ift57	ENSRNOG00000001958	3.81745	0.788557	0.749858
Mx2	ENSRNOG00000001963	0.786776	-0.261529	0.911582
Cd47	ENSRNOG00000001964	7.55315	0.258772	0.888318
Bbx	ENSRNOG00000001971	1.11194	4.30933	0.0355521
Rcan1	ENSRNOG00000001979	4.31674	1.93684	0.347705
Cblb	ENSRNOG00000001982	0.833234	2.04268	0.293978
Alcam	ENSRNOG00000001989	7.14421	1.21832	0.524635
Atp5o	ENSRNOG00000001991	8.13934	-0.927401	0.588059
Atp6v1a	ENSRNOG00000001992	9.43283	0.799569	0.533394
Ythdc1	ENSRNOG00000001996	5.30116	1.31471	0.494888
Itsn1	ENSRNOG00000002001	1.3982	3.17292	0.122923
Tmprss11f	ENSRNOG00000002005	-0.624988	-2.37709	0.0746856
Gnrhr	ENSRNOG00000002011	-0.440747	-1.39527	0.308849
Sidt1	ENSRNOG00000002013	5.40201	1.54935	0.47005
Son	ENSRNOG00000002021	8.05799	-2.07095	0.187578
Epha5	ENSRNOG00000002024	5.35001	0.387536	0.850209
Tmem50b	ENSRNOG00000002028	6.75867	5.10668	0.0181193
Ifngr2	ENSRNOG00000002032	4.78904	0.648325	0.767943
Paqr3	ENSRNOG00000002035	2.81444	1.30429	0.684659
Evi5	ENSRNOG00000002039	7.43425	-2.55608	0.361185
Bmp2k	ENSRNOG00000002040	1.21072	-6.05294	0.0156752
Boc	ENSRNOG00000002041	3.16968	0.628485	0.839301
Gtpbp8	ENSRNOG00000002044	4.73445	-3.06762	0.145457
Anxa3	ENSRNOG00000002045	5.23923	-5.66417	0.0150509
Igfbp7	ENSRNOG00000002050	3.7409	-3.34969	0.148506
Synj1	ENSRNOG00000002051	7.96348	0.97861	0.495667
Glmn	ENSRNOG00000002054	5.29165	2.37277	0.298961
Noa1	ENSRNOG00000002055	1.95578	3.47532	0.171206
Ptpn13	ENSRNOG00000002061	0.749752	-0.342653	0.883028
Slc35a5	ENSRNOG00000002069	0.224994	2.53702	0.156951
Cnot6l	ENSRNOG00000002075	1.33059	2.1953	0.321934
Mapk10	ENSRNOG00000002079	6.32542	2.65112	0.18281
Urb1	ENSRNOG00000002080	1.87887	4.13335	0.0448365
Ccng2	ENSRNOG00000002089	5.04566	-3.36954	0.111022
Gtf3c3	ENSRNOG00000002091	3.55697	2.28824	0.328001
Tgfbr3	ENSRNOG00000002093	3.14411	-2.084	0.348026
Atg3	ENSRNOG00000002094	4.97972	-4.61808	0.0652728
Rasl11b	ENSRNOG00000002097	5.30769	2.2295	0.388811
Srp72	ENSRNOG00000002100	3.07819	3.14296	0.199904
Paics	ENSRNOG00000002101	3.12343	-2.0156	0.409331
Scaf4	ENSRNOG00000002104	3.57928	0.382881	0.900034
Usp46	ENSRNOG00000002106	7.65611	-0.936627	0.556809
Zfp644	ENSRNOG00000002112	5.47544	2.51813	0.393797
Sod1	ENSRNOG00000002115	6.30985	-0.914627	0.619315
Lrrc8d	ENSRNOG00000002121	3.66007	-0.230546	0.916914
Lrrc8c	ENSRNOG00000002122	2.49198	-1.20279	0.698821
Ccni	ENSRNOG00000002125	5.58687	-1.64266	0.393008
Ncam2	ENSRNOG00000002126	1.69307	0.571501	0.823597
Ppat	ENSRNOG00000002128	3.81826	0.992638	0.664225
Lrrc8b	ENSRNOG00000002129	5.23531	-3.50346	0.13437
Sgcb	ENSRNOG00000002135	1.89677	2.48405	0.335548
Aasdh	ENSRNOG00000002137	3.30429	-0.3472	0.893771
RGD1311575	ENSRNOG00000002139	5.50352	3.17177	0.153531
Cd200	ENSRNOG00000002141	3.12802	2.74726	0.209265
Cds1	ENSRNOG00000002142	1.36372	4.84542	0.029676
Pkd2	ENSRNOG00000002146	2.39878	4.2236	0.0452687
Dcun1d4	ENSRNOG00000002152	3.86301	4.08828	0.104675
Cep135	ENSRNOG00000002153	0.535976	-3.21423	0.157447
Agpat9	ENSRNOG00000002159	4.99833	-6.9701	0.0351832
Klf3	ENSRNOG00000002163	4.37568	-7.93808	0.00169267
Clock	ENSRNOG00000002175	3.44525	4.58556	0.0582176
Gnpda2	ENSRNOG00000002177	0.167493	2.44945	0.187858
Mrps18c	ENSRNOG00000002178	-0.135149	1.83675	0.258578
Tbc1d1	ENSRNOG00000002180	4.16321	-0.0124597	0.996092
Helq	ENSRNOG00000002181	3.3674	-7.13132	0.00440763
2018-09-11	ENSRNOG00000002182	4.04031	4.12583	0.102649
Pgm2	ENSRNOG00000002185	1.97868	-0.707193	0.762808
Nudt9	ENSRNOG00000002186	2.64149	2.20676	0.296617
LOC498368	ENSRNOG00000002191	2.18446	-1.94359	0.398941
Rell1	ENSRNOG00000002192	1.17493	0.0611029	0.979047
Coq2	ENSRNOG00000002194	6.86669	2.18695	0.300241
Ociad2	ENSRNOG00000002196	-0.624988	0.853014	0.4932
Tmem165	ENSRNOG00000002199	3.56126	2.2964	0.288805
Lin54	ENSRNOG00000002203	-0.624988	-0.829303	0.500235
Ociad1	ENSRNOG00000002205	6.2639	2.13617	0.276609
Guf1	ENSRNOG00000002207	0.0768506	0.782062	0.612679
Shroom3	ENSRNOG00000002208	2.90966	5.81097	0.00424259
Klhl8	ENSRNOG00000002214	3.81149	6.16918	0.00433449
Srd5a3	ENSRNOG00000002216	2.56333	-5.1969	0.064673
Kit	ENSRNOG00000002227	1.83738	0.879007	0.714025
Adcy5	ENSRNOG00000002229	0.844312	-0.578377	0.801776
Aff1	ENSRNOG00000002232	3.89416	-1.19295	0.595843
Dirc2	ENSRNOG00000002240	7.00976	1.42025	0.408282
Hspbap1	ENSRNOG00000002241	0.0278705	-3.61411	0.0458484
Pdgfra	ENSRNOG00000002244	5.77586	-9.85433	0.00051704
Nup54	ENSRNOG00000002247	2.11293	-1.01629	0.72496
Fryl	ENSRNOG00000002248	-0.228748	-1.29487	0.365088
Sec31a	ENSRNOG00000002251	-0.624988	-0.70639	0.527432
Tmem33	ENSRNOG00000002254	6.11776	0.174027	0.927801
Fam162a	ENSRNOG00000002255	3.29145	-0.742712	0.801609
Art3	ENSRNOG00000002256	1.14422	-4.31773	0.0399237
Tmem150c	ENSRNOG00000002258	1.00108	4.09462	0.0354589
Enoph1	ENSRNOG00000002262	7.3431	0.246625	0.897806
Casr	ENSRNOG00000002265	0.167493	-0.783903	0.583202
Chic2	ENSRNOG00000002267	2.07228	3.07429	0.156454
Hnrnpdl	ENSRNOG00000002270	1.8941	5.85267	0.00488286
Slain2	ENSRNOG00000002271	2.22403	1.4163	0.527586
Lnx1	ENSRNOG00000002272	4.0799	0.729758	0.736705
Naaa	ENSRNOG00000002273	2.8378	-2.40312	0.526828
Fip1l1	ENSRNOG00000002275	4.07263	5.87266	0.0160533
Phf6	ENSRNOG00000002276	1.82375	-1.94487	0.434257
Tec	ENSRNOG00000002278	3.56413	3.56846	0.145347
Sh3bgrl	ENSRNOG00000002280	-0.624988	-2.37709	0.0746856
Hnrpd	ENSRNOG00000002292	2.39263	5.41704	0.0123409
Uso1	ENSRNOG00000002301	4.87083	0.274927	0.890623
Kcnj12	ENSRNOG00000002303	1.37828	4.85896	0.0156459
Slc15a2	ENSRNOG00000002305	3.89533	-4.95978	0.04334
Hlx	ENSRNOG00000002309	1.95521	-6.00853	0.0274027
LOC103689943	ENSRNOG00000002314	1.621	0.805702	0.697606
Limch1	ENSRNOG00000002318	4.14387	3.7851	0.0948966
Tsn	ENSRNOG00000002319	6.46982	-0.171183	0.930405
Commd8	ENSRNOG00000002320	1.75834	-2.37324	0.268219
RGD1566265	ENSRNOG00000002323	-0.0445062	-1.31678	0.363319
Gabrb1	ENSRNOG00000002327	5.01668	-0.506481	0.825824
Gabra4	ENSRNOG00000002336	6.42058	2.44567	0.19551
Dgke	ENSRNOG00000002338	3.46622	5.42984	0.0142607
Mark1	ENSRNOG00000002339	2.85481	5.68967	0.00513529
Aldh3a2	ENSRNOG00000002342	0.436994	2.96657	0.103803
Uchl1	ENSRNOG00000002343	8.50062	2.41631	0.0950503
Rasgef1b	ENSRNOG00000002345	-0.0961189	1.87143	0.265002
Rgl1	ENSRNOG00000002347	4.67881	6.051	0.0129004
Tsen15	ENSRNOG00000002352	1.73105	-2.42216	0.429515
Rab3gap2	ENSRNOG00000002353	5.3696	1.49127	0.593086
Scpep1	ENSRNOG00000002358	5.17607	3.18144	0.378949
Prkg2	ENSRNOG00000002361	2.28878	6.6217	0.00252959
Rnf112	ENSRNOG00000002364	5.07272	5.13173	0.0205471
Itm2a	ENSRNOG00000002365	6.82321	-10.3611	0.000148636
Iars2	ENSRNOG00000002368	0.702476	0.917042	0.633555
Rgs8	ENSRNOG00000002369	3.30221	1.00061	0.717214
Akap1	ENSRNOG00000002373	3.52032	1.11015	0.665735
Bpnt1	ENSRNOG00000002378	3.55885	3.61476	0.13966
Bmp3	ENSRNOG00000002381	2.21727	6.59248	0.00412394
Tceal1	ENSRNOG00000002387	1.66266	0.175184	0.943346
Trim41	ENSRNOG00000002388	3.2026	5.27986	0.00707638
Morf4l2	ENSRNOG00000002389	5.95184	1.47225	0.418333
Eprs	ENSRNOG00000002393	7.39538	-0.504117	0.749562
Tpr	ENSRNOG00000002394	2.54339	0.115728	0.969391
Slc30a10	ENSRNOG00000002397	3.31854	-2.63891	0.243636
Pdxdc1	ENSRNOG00000002407	2.49741	-0.865917	0.779805
Gpc4	ENSRNOG00000002413	3.91633	-0.73218	0.803311
Tfcp2l1	ENSRNOG00000002414	4.04559	0.610821	0.772939
Tgfb2	ENSRNOG00000002418	5.66305	2.11395	0.447885
Plp1	ENSRNOG00000002419	8.45131	-5.85987	0.0237037
Zc3h7a	ENSRNOG00000002420	4.20386	-2.89962	0.25064
Lpar4	ENSRNOG00000002428	1.44443	-0.670652	0.753143
G3bp2	ENSRNOG00000002433	3.35795	1.64993	0.537782
Tmem100	ENSRNOG00000002434	2.40193	-5.08899	0.0335297
Mmd	ENSRNOG00000002436	8.74927	0.523013	0.687359
Ralb	ENSRNOG00000002440	3.23093	1.28841	0.649761
Mfap3	ENSRNOG00000002443	2.34464	1.39908	0.59136
Maged2	ENSRNOG00000002449	0.351734	-1.08482	0.545995
Rrp15	ENSRNOG00000002450	1.68054	1.09847	0.647496
Fndc3c1	ENSRNOG00000002451	-0.624988	-0.913943	0.44715
Txndc11	ENSRNOG00000002452	6.1836	2.34153	0.473685
Rnf2	ENSRNOG00000002454	2.96152	-2.07599	0.392895
Nid1	ENSRNOG00000002461	1.16498	-2.05802	0.354667
LOC100911746	ENSRNOG00000002462	1.13883	-1.44007	0.478251
Tnr	ENSRNOG00000002468	2.31212	-4.76447	0.0882736
Tom1l1	ENSRNOG00000002474	-0.228748	1.60448	0.310657
AABR07058831.1	ENSRNOG00000002475	-0.624988	-2.37709	0.0746856
Gpr137b	ENSRNOG00000002480	-0.0445062	-1.91654	0.199336
Cdkl2	ENSRNOG00000002506	6.46944	1.27218	0.50788
Gnl3l	ENSRNOG00000002509	4.97476	-0.196652	0.923701
Flt4	ENSRNOG00000002511	-0.31939	-1.66448	0.265038
Mtm1	ENSRNOG00000002516	-0.0445062	-1.64351	0.324458
Gpr37	ENSRNOG00000002524	2.33999	-0.79323	0.738463
Ptgs2	ENSRNOG00000002525	4.67285	3.91793	0.0853989
Rap2c	ENSRNOG00000002529	3.76963	-0.655144	0.806074
C1galt1c1	ENSRNOG00000002536	2.64334	-1.07521	0.626079
Wnk3	ENSRNOG00000002537	0.318159	-2.80417	0.191647
Epb4.1l5	ENSRNOG00000002538	0.0278705	2.14101	0.209633
Kifap3	ENSRNOG00000002544	7.74479	2.89533	0.0912604
RGD1309748	ENSRNOG00000002545	3.51124	3.75842	0.133437
Rchy1	ENSRNOG00000002546	2.9549	-2.88245	0.241142
Htr5b	ENSRNOG00000002549	1.21901	2.42536	0.210117
Smim14	ENSRNOG00000002553	4.36433	1.07954	0.666647
Tsr2	ENSRNOG00000002556	6.95697	2.34615	0.298347
Mcts1	ENSRNOG00000002563	4.16108	1.06084	0.621053
Mrps14	ENSRNOG00000002569	1.45886	-0.791893	0.717624
Cacybp	ENSRNOG00000002572	5.74769	-0.00281883	0.998785
Nubp1	ENSRNOG00000002574	3.98247	5.35975	0.0115405
Sap30l	ENSRNOG00000002575	0.21732	0.712386	0.715941
Parm1	ENSRNOG00000002579	3.18063	6.95887	0.000580173
Trmt1l	ENSRNOG00000002580	8.44266	-3.89892	0.029717
Cul4b	ENSRNOG00000002585	1.3621	1.59802	0.392603
Rps6ka6	ENSRNOG00000002592	-0.624988	0.853014	0.4932
Sox9	ENSRNOG00000002607	5.27034	-5.41609	0.0520621
Carhsp1	ENSRNOG00000002610	3.54378	2.68562	0.204728
Ddx52	ENSRNOG00000002612	2.02023	4.08825	0.172217
Ivns1abp	ENSRNOG00000002618	7.54073	-0.514388	0.761255
Ptpn4	ENSRNOG00000002625	2.89446	4.0028	0.0460307
Kctd3	ENSRNOG00000002627	3.12674	-4.52913	0.158395
Cnot8	ENSRNOG00000002630	5.30461	0.199075	0.948658
Naca	ENSRNOG00000002632	6.06639	1.93536	0.335995
Dexi	ENSRNOG00000002635	0.833234	3.76115	0.0482193
Abat	ENSRNOG00000002636	1.92387	-0.155048	0.960619
Ptges3	ENSRNOG00000002642	8.63467	-1.24177	0.335916
Ugdh	ENSRNOG00000002643	5.91108	2.08339	0.348007
Utp18	ENSRNOG00000002644	3.1428	2.8275	0.273387
Rap1gap2	ENSRNOG00000002652	7.18081	-0.400193	0.79424
Kcnk2	ENSRNOG00000002653	3.21759	4.28303	0.118274
Magee1	ENSRNOG00000002660	0.985748	4.06579	0.0349472
Pbdc1	ENSRNOG00000002662	2.40827	1.11102	0.677034
Lamc2	ENSRNOG00000002667	0.581119	3.26275	0.11615
Cluh	ENSRNOG00000002669	1.03477	-1.35916	0.553541
Nme2	ENSRNOG00000002671	3.86278	4.55579	0.0596959
Lamc1	ENSRNOG00000002680	1.77078	-0.112775	0.963701
Zfp692	ENSRNOG00000002682	4.34327	2.7449	0.343239
Nme1	ENSRNOG00000002693	7.09471	-0.0689189	0.967496
Mtmr1	ENSRNOG00000002697	6.72263	3.15585	0.207333
Vps4b	ENSRNOG00000002705	5.11378	1.47249	0.493593
Zfp672	ENSRNOG00000002713	0.95799	-1.277	0.613311
Mettl22	ENSRNOG00000002714	2.94271	-2.725	0.421402
LOC688963	ENSRNOG00000002721	2.47843	0.179525	0.93903
Sec14l1	ENSRNOG00000002722	5.53002	-0.828423	0.677363
Prpsap2	ENSRNOG00000002724	1.82806	2.85512	0.174392
Rgs5	ENSRNOG00000002730	1.26937	-6.14999	0.00668795
Dhx9	ENSRNOG00000002735	2.50449	0.0290595	0.989223
Fstl1	ENSRNOG00000002746	1.9891	2.19888	0.359514
Ccdc43	ENSRNOG00000002748	1.23919	4.57488	0.0200648
Spag9	ENSRNOG00000002749	5.93136	-0.650964	0.731542
Adam11	ENSRNOG00000002753	0.522918	3.13757	0.0937013
Pafah1b1	ENSRNOG00000002755	3.89572	7.77695	0.000195788
Tada2a	ENSRNOG00000002757	3.24859	-0.577017	0.819956
Lias	ENSRNOG00000002759	3.45893	1.84507	0.508854
Ulk2	ENSRNOG00000002763	7.03644	-5.89225	0.00512348
Dlg3	ENSRNOG00000002767	6.2448	2.83169	0.256604
Rgs4	ENSRNOG00000002773	9.32002	-0.656959	0.636642
Aatf	ENSRNOG00000002778	1.24055	4.56987	0.0218986
Kdsr	ENSRNOG00000002781	1.24597	4.57131	0.0329987
Serpinc1	ENSRNOG00000002783	-0.624988	-0.70639	0.527432
Brinp3	ENSRNOG00000002811	-0.0445062	2.03946	0.240093
Dars2	ENSRNOG00000002813	3.18435	-0.423435	0.847383
Eftud2	ENSRNOG00000002818	4.53314	2.78619	0.199733
LOC24906	ENSRNOG00000002820	2.67659	-2.01005	0.360278
Phlpp1	ENSRNOG00000002821	6.39851	-0.786405	0.734498
Mapk9	ENSRNOG00000002823	6.35664	2.75203	0.210674
Hsd17b7	ENSRNOG00000002826	0.668605	1.33735	0.468656
Rbfox1	ENSRNOG00000002827	7.85813	4.09468	0.0205056
Tob1	ENSRNOG00000002828	3.58274	-1.38644	0.547114
Slc16a2	ENSRNOG00000002832	3.56986	4.00197	0.0984931
Gsk3b	ENSRNOG00000002833	0.919159	0.750062	0.727004
Luc7l3	ENSRNOG00000002835	5.30553	3.67585	0.113175
Pdzd11	ENSRNOG00000002838	3.41312	2.90175	0.268303
Slc19a2	ENSRNOG00000002839	1.67309	3.71389	0.0719155
Atp5b	ENSRNOG00000002840	8.73071	-0.9161	0.464576
Cdc42bpa	ENSRNOG00000002841	1.40805	-1.69836	0.556322
Cxcl6	ENSRNOG00000002843	3.11075	-0.629374	0.771441
Maoa	ENSRNOG00000002848	3.19138	1.31888	0.538936
Fam104a	ENSRNOG00000002851	5.4085	0.833741	0.6828
Myo19	ENSRNOG00000002852	1.14422	-0.969943	0.674008
Rfc1	ENSRNOG00000002855	4.08581	2.35761	0.300424
Ccdc181	ENSRNOG00000002860	1.05357	-2.47114	0.21544
Nacc1	ENSRNOG00000002864	2.51757	1.95037	0.439043
Rassf6	ENSRNOG00000002866	3.77174	-0.487758	0.821509
Rbm25l1	ENSRNOG00000002871	-0.013792	2.06965	0.218343
Rbm25	ENSRNOG00000002874	-0.0961189	1.94011	0.254129
Klhl20	ENSRNOG00000002875	5.37255	-1.71567	0.401537
Psen2	ENSRNOG00000002879	2.70419	5.81835	0.00662735
Ddr2	ENSRNOG00000002881	0.688047	0.305209	0.878272
Blzf1	ENSRNOG00000002884	-0.624988	-2.37709	0.0746856
Myh10	ENSRNOG00000002886	7.81333	-0.317417	0.850453
Nagpa	ENSRNOG00000002895	-0.31939	1.50377	0.322884
Prdx6	ENSRNOG00000002896	6.89016	-3.02146	0.0891955
Nme7	ENSRNOG00000002898	2.94587	-2.19379	0.338331
Akap10	ENSRNOG00000002899	1.51779	2.57409	0.334952
Specc1	ENSRNOG00000002903	5.09014	-5.1359	0.0195037
Plekha6	ENSRNOG00000002907	2.83041	5.16359	0.0175255
Slc35a4	ENSRNOG00000002908	1.26174	2.89707	0.154907
Alb	ENSRNOG00000002911	2.29052	-5.79905	0.0143282
Parn	ENSRNOG00000002912	0.581119	1.779	0.411176
Trmt1	ENSRNOG00000002914	0.932216	3.95892	0.0390779
Car4	ENSRNOG00000002916	4.57478	-9.92458	0.000162897
Gfap	ENSRNOG00000002919	5.72471	-5.46306	0.0126236
Adora2b	ENSRNOG00000002922	-0.440747	-0.845981	0.501603
Uap1	ENSRNOG00000002926	2.02258	1.82256	0.430907
Guk1	ENSRNOG00000002928	6.32291	-2.6884	0.144553
Atp1b1	ENSRNOG00000002934	9.3905	0.778696	0.514705
Ankrd40	ENSRNOG00000002935	5.848	5.03916	0.0233668
Ankrd17	ENSRNOG00000002940	6.34854	1.70341	0.477837
Uhmk1	ENSRNOG00000002941	0.781946	1.58596	0.483136
Mrpl55	ENSRNOG00000002943	1.68521	0.644307	0.783666
RGD1304587	ENSRNOG00000002944	0.424111	1.21175	0.509645
Pgs1	ENSRNOG00000002949	4.12662	0.587404	0.833489
Stim2	ENSRNOG00000002956	1.65798	-3.56076	0.116986
LOC100909913	ENSRNOG00000002960	2.07037	-2.85838	0.264595
C1ql1	ENSRNOG00000002963	0.865495	-3.76418	0.0571864
Ttc19	ENSRNOG00000002977	0.589507	3.2758	0.0820999
Tsr1	ENSRNOG00000002980	0.424111	2.93634	0.117142
Nmt1	ENSRNOG00000002989	2.42669	5.44216	0.00591609
Srr	ENSRNOG00000002991	1.98132	2.20294	0.328271
Slc9a3r2	ENSRNOG00000002997	4.72319	-7.30007	0.00718309
Timmdc1	ENSRNOG00000002999	1.08638	2.15855	0.26155
Tbc1d19	ENSRNOG00000003003	2.36292	3.95357	0.0803849
Rasgef1c	ENSRNOG00000003005	1.75541	4.09001	0.0363112
Gadd45gip1	ENSRNOG00000003011	0.465376	3.03222	0.113112
Poglut1	ENSRNOG00000003014	3.86308	1.89634	0.369147
Olfml2b	ENSRNOG00000003018	-0.0445062	-0.223553	0.883561
Ubn1	ENSRNOG00000003019	3.17181	-2.58818	0.277253
Nap1l2	ENSRNOG00000003025	2.26436	3.43819	0.119496
Rad23a	ENSRNOG00000003026	2.25082	0.648963	0.804794
Calr	ENSRNOG00000003029	5.92512	-1.51886	0.431901
Atp2b4	ENSRNOG00000003031	7.22805	3.31873	0.239208
Plcd3	ENSRNOG00000003033	2.74341	-1.61375	0.490542
Smg6	ENSRNOG00000003041	3.65103	0.365436	0.866819
Mettl13	ENSRNOG00000003042	0.184878	-1.40235	0.429187
Tiprl	ENSRNOG00000003048	3.27122	1.38012	0.519511
Tbc1d9b	ENSRNOG00000003050	5.97572	0.400998	0.823443
LOC679960	ENSRNOG00000003062	3.05046	1.9453	0.447459
Glyr1	ENSRNOG00000003065	4.71437	1.66694	0.449785
Cd38	ENSRNOG00000003069	0.0768506	-1.04205	0.550455
Vamp4	ENSRNOG00000003071	6.04621	2.67272	0.16395
Tmem39a	ENSRNOG00000003075	4.14433	-1.73385	0.66291
Dcaf6	ENSRNOG00000003078	1.27684	4.65995	0.0238593
Parp1	ENSRNOG00000003084	5.36888	3.75673	0.0757317
Cenpv	ENSRNOG00000003086	1.3736	3.3254	0.0852467
Prom1	ENSRNOG00000003098	2.97872	-6.33726	0.0139268
Ubqln2	ENSRNOG00000003099	4.37345	2.84642	0.168563
Trpv2	ENSRNOG00000003104	3.60634	4.91055	0.0410543
Acbd4	ENSRNOG00000003108	1.81875	-0.79785	0.788346
Ovca2	ENSRNOG00000003111	3.65859	-0.77058	0.728828
Psmd12	ENSRNOG00000003117	5.99383	3.64205	0.209666
Rtn4rl1	ENSRNOG00000003121	2.32606	1.17141	0.674207
Hdac8	ENSRNOG00000003122	1.04819	4.19374	0.031514
Rpa1	ENSRNOG00000003123	-0.31939	-0.171873	0.898333
Rogdi	ENSRNOG00000003125	4.86369	0.0601472	0.975996
Zfp496	ENSRNOG00000003129	0.300122	-4.2146	0.0421785
Traf7	ENSRNOG00000003131	2.13147	-2.32902	0.346638
Mip	ENSRNOG00000003132	4.2838	-0.373955	0.858602
Slc4a4	ENSRNOG00000003134	2.35164	1.83802	0.481164
Fcrla	ENSRNOG00000003136	2.23846	-0.0664456	0.975269
Smc1a	ENSRNOG00000003139	1.80391	1.47083	0.531061
Sqstm1	ENSRNOG00000003147	9.8432	1.22122	0.349202
Timp2	ENSRNOG00000003148	3.98656	2.20923	0.29491
Farsa	ENSRNOG00000003149	1.6541	5.42589	0.00872795
Mpc2	ENSRNOG00000003150	5.15628	1.19852	0.549359
Bfar	ENSRNOG00000003151	2.29811	4.1462	0.0493381
Gm8444	ENSRNOG00000003158	-0.440747	-0.401567	0.746745
Sdhc	ENSRNOG00000003163	5.81592	0.790949	0.686842
Serpinf1	ENSRNOG00000003172	2.08501	-3.94469	0.153004
Tapt1	ENSRNOG00000003174	3.86164	1.59765	0.562403
Mixl1	ENSRNOG00000003176	2.25922	-0.931717	0.6654
Mat2b	ENSRNOG00000003177	5.52042	0.995384	0.611759
Mageh1	ENSRNOG00000003178	3.06759	1.4067	0.523581
Acbd3	ENSRNOG00000003185	3.57681	0.53704	0.83018
Anks3	ENSRNOG00000003186	0.991233	4.08723	0.070955
Armcx5	ENSRNOG00000003187	3.05796	-0.0114455	0.995777
Bhlhb9	ENSRNOG00000003191	-0.228748	1.60448	0.310657
Caskin1	ENSRNOG00000003195	2.48011	-0.338865	0.909854
RGD1305733	ENSRNOG00000003198	5.67914	3.32979	0.12018
LOC100362640	ENSRNOG00000003201	7.73507	-2.96412	0.060633
Hexim1	ENSRNOG00000003203	5.47264	-1.17599	0.625442
Ldb2	ENSRNOG00000003205	7.14629	3.24356	0.144595
Actr3	ENSRNOG00000003206	8.33715	-0.0711198	0.96248
Fmnl1	ENSRNOG00000003207	5.1772	2.92666	0.23813
Pcp4l1	ENSRNOG00000003209	0.167493	-0.45717	0.768156
Srp9	ENSRNOG00000003211	3.13346	1.45196	0.505822
Helz	ENSRNOG00000003213	3.25929	3.16315	0.255913
H3f3b	ENSRNOG00000003220	6.09905	-0.342341	0.845744
Degs1	ENSRNOG00000003223	6.70527	3.27574	0.0763484
Mprip	ENSRNOG00000003226	8.7557	-2.43702	0.0760606
Mid1ip1	ENSRNOG00000003228	6.87697	-4.2234	0.0393604
Tspan7	ENSRNOG00000003229	10.4062	0.334378	0.718729
Slc9a3r1	ENSRNOG00000003232	2.59984	-3.56655	0.163522
Mgrn1	ENSRNOG00000003234	3.1462	3.68635	0.121557
Mgat4b	ENSRNOG00000003235	2.57367	-0.389381	0.888044
Tp53bp2	ENSRNOG00000003237	4.39453	-2.64685	0.302817
Cant1	ENSRNOG00000003239	4.73245	-2.70665	0.231074
Gabrg2	ENSRNOG00000003241	-0.440747	1.2481	0.374376
Wdr81	ENSRNOG00000003243	1.68481	-2.49893	0.243484
Sde2	ENSRNOG00000003247	3.35606	-0.442412	0.85243
Mpzl1	ENSRNOG00000003248	7.53881	-1.09184	0.485208
B3galt2	ENSRNOG00000003251	1.80429	4.1781	0.0369153
Qdpr	ENSRNOG00000003253	7.87826	-1.00509	0.567637
Ccng1	ENSRNOG00000003256	7.75131	0.151686	0.922927
Cdc73	ENSRNOG00000003258	2.40773	2.0143	0.408082
Nr1i3	ENSRNOG00000003260	0.742592	3.57997	0.0570708
Usp9x	ENSRNOG00000003261	7.17728	-0.0078866	0.995879
Cacng4	ENSRNOG00000003262	3.29182	1.69628	0.521131
Nat9	ENSRNOG00000003264	1.43448	1.11176	0.614224
Pycr2	ENSRNOG00000003267	0.184878	2.47528	0.166991
Maml1	ENSRNOG00000003268	0.63611	3.36876	0.0763102
Atp6v0e1	ENSRNOG00000003269	4.39134	-2.80305	0.215964
Syce2	ENSRNOG00000003279	2.44392	4.32757	0.0388321
Mcm9	ENSRNOG00000003281	0.484363	1.29644	0.54779
Rcsd1	ENSRNOG00000003283	2.443	-8.38744	0.000220091
Lap3	ENSRNOG00000003289	3.53306	-2.7089	0.252273
Creg1	ENSRNOG00000003291	3.21255	-3.98634	0.196319
Cd247	ENSRNOG00000003298	3.34602	1.11611	0.616004
Btg2	ENSRNOG00000003300	9.95749	-2.16248	0.242154
Flcn	ENSRNOG00000003302	5.69983	-1.67088	0.396636
Gcdh	ENSRNOG00000003307	1.27478	4.66572	0.0400282
LOC100910121	ENSRNOG00000003326	2.09836	-2.11796	0.520971
Cdip1	ENSRNOG00000003328	7.90898	-0.249741	0.861185
Ppm1d	ENSRNOG00000003329	2.02294	2.37607	0.290386
Acsf2	ENSRNOG00000003330	2.94235	-1.36514	0.534654
Nt5m	ENSRNOG00000003332	0.41526	-2.07902	0.321269
Klhl21	ENSRNOG00000003334	0.0881225	2.26184	0.192245
Mybph	ENSRNOG00000003336	1.56623	0.748206	0.752445
Pmp22	ENSRNOG00000003338	4.789	-5.82427	0.0188626
Canx	ENSRNOG00000003343	8.70327	-0.834729	0.502414
Fancb	ENSRNOG00000003346	0.673017	3.43915	0.0744543
Rasd1	ENSRNOG00000003348	3.71079	5.70233	0.0185798
Mospd2	ENSRNOG00000003350	0.720217	-1.47826	0.487394
Ogt	ENSRNOG00000003359	7.6693	1.94681	0.211537
Cadm3	ENSRNOG00000003365	2.11386	6.36345	0.00299179
Ccdc85a	ENSRNOG00000003374	0.149227	-0.903761	0.61721
Glrx2	ENSRNOG00000003385	1.6104	-2.92862	0.290254
Rbfox3	ENSRNOG00000003386	4.93976	2.23243	0.310827
Grsf1	ENSRNOG00000003392	2.42564	6.93654	0.00065617
Adprm	ENSRNOG00000003397	1.26642	-6.13846	0.00593204
Tomm40l	ENSRNOG00000003398	1.802	5.72078	0.00535626
Hnrnph1	ENSRNOG00000003399	7.69483	-1.8662	0.264304
Stx6	ENSRNOG00000003402	3.15362	3.79494	0.105384
Slc35f5	ENSRNOG00000003403	0.0881225	2.26184	0.192245
Elac2	ENSRNOG00000003424	1.41874	-2.44083	0.310905
Rufy3	ENSRNOG00000003428	6.63336	1.26044	0.504861
Trove2	ENSRNOG00000003434	6.12945	-2.33366	0.230248
Adora1	ENSRNOG00000003442	0.502401	1.07703	0.603251
Lypd1	ENSRNOG00000003453	2.86473	5.23533	0.0152373
Ccdc64b	ENSRNOG00000003457	2.05106	-0.972472	0.656644
Zfp330	ENSRNOG00000003461	1.99364	3.99398	0.0637413
Hid1	ENSRNOG00000003464	3.18961	-0.770607	0.763832
MAST1	ENSRNOG00000003469	4.12139	0.709401	0.811409
Fundc1	ENSRNOG00000003470	3.67337	-0.575158	0.802317
Prkca	ENSRNOG00000003491	1.13337	2.6429	0.308036
Ppfia4	ENSRNOG00000003494	2.51071	3.94217	0.0752381
Prpf8	ENSRNOG00000003495	5.02372	2.89722	0.207774
Tbc1d9	ENSRNOG00000003496	1.73419	2.39404	0.265878
Rnaseh2a	ENSRNOG00000003504	0.484363	-2.95045	0.126673
Gosr2	ENSRNOG00000003506	0.436994	2.95867	0.132926
Ergic1	ENSRNOG00000003508	3.43452	4.06171	0.0907424
Gabra1	ENSRNOG00000003512	9.54003	1.24803	0.271682
Prdx2	ENSRNOG00000003520	9.38783	0.600488	0.677399
Lrrc59	ENSRNOG00000003524	1.28937	4.66621	0.0200639
Clcn4	ENSRNOG00000003533	2.22403	3.36485	0.130993
Rufy1	ENSRNOG00000003536	5.4434	4.59694	0.0934272
Spta1	ENSRNOG00000003537	0.351734	-0.443628	0.773274
Adamts4	ENSRNOG00000003538	-0.135149	-0.396105	0.784397
Pggt1b	ENSRNOG00000003541	-0.31939	-1.74912	0.23266
Hcfc1r1	ENSRNOG00000003542	2.22887	3.15331	0.153737
Uchl5	ENSRNOG00000003545	1.7541	-1.7175	0.526472
Cnpy2	ENSRNOG00000003549	3.19241	-4.21477	0.0804672
Acbd6	ENSRNOG00000003550	2.85567	1.52238	0.480279
B4galt3	ENSRNOG00000003551	4.83829	0.251884	0.906208
Efemp1	ENSRNOG00000003553	-0.624988	-0.70639	0.527432
Ccdc112	ENSRNOG00000003559	1.40083	1.01884	0.613477
Susd4	ENSRNOG00000003562	3.19763	2.15443	0.433081
Blmh	ENSRNOG00000003563	0.880604	3.8565	0.0447357
Ints2	ENSRNOG00000003576	1.84529	-1.10519	0.643314
Fem1c	ENSRNOG00000003578	2.28965	1.03215	0.678385
Pou2f1	ENSRNOG00000003581	0.382449	2.85571	0.116999
Smyd2	ENSRNOG00000003583	2.75413	4.92374	0.0198764
Med28	ENSRNOG00000003592	3.44393	-0.296272	0.921674
Tmem183a	ENSRNOG00000003594	5.82628	-0.0403816	0.984415
Tuba4a	ENSRNOG00000003597	7.32645	0.876303	0.579214
Pnpt1	ENSRNOG00000003600	2.27857	-5.07589	0.0277471
Arhgap44	ENSRNOG00000003603	-0.135149	1.81935	0.261524
RGD1561381	ENSRNOG00000003606	1.85086	0.275838	0.910353
Dynlt3	ENSRNOG00000003611	3.77846	3.55065	0.168566
Grem2	ENSRNOG00000003616	1.14717	-0.998769	0.676404
Cybb	ENSRNOG00000003622	2.47873	0.142066	0.951217
Ubxn4	ENSRNOG00000003625	4.57299	6.46885	0.0225508
Atp5h	ENSRNOG00000003626	3.79797	0.786008	0.797093
Nvl	ENSRNOG00000003629	2.5118	-1.04831	0.660226
Zfp354a	ENSRNOG00000003634	3.24202	2.40013	0.297198
Hnrnpab	ENSRNOG00000003645	6.02302	-2.4781	0.26681
Fh	ENSRNOG00000003653	3.14558	3.12167	0.203137
Hn1	ENSRNOG00000003661	3.08798	3.55008	0.133171
	ENSRNOG00000003670	3.86417	0.68817	0.755929
Nup85	ENSRNOG00000003673	2.97368	6.29005	0.00284646
Ptchd1	ENSRNOG00000003675	0.9479	2.26475	0.26559
Med13	ENSRNOG00000003679	-0.31939	1.42162	0.344742
Hook2	ENSRNOG00000003682	0.932216	-3.88774	0.0509066
Tbl1x	ENSRNOG00000003686	0.473091	0.526768	0.769335
Rgs2	ENSRNOG00000003687	3.34284	-1.79429	0.418929
Nono	ENSRNOG00000003689	3.58754	-2.21479	0.387784
Tmed7	ENSRNOG00000003691	6.75336	-1.34496	0.447893
Fam184b	ENSRNOG00000003704	0.300122	-0.660714	0.698211
Ufc1	ENSRNOG00000003706	4.1462	1.65222	0.459086
Zmym3	ENSRNOG00000003707	1.04819	-0.524379	0.837887
Smek2	ENSRNOG00000003712	4.73128	-2.30844	0.271235
Clk4	ENSRNOG00000003714	5.08128	3.35357	0.105781
Cnih4	ENSRNOG00000003717	1.74546	-5.51797	0.00969902
Atpaf2	ENSRNOG00000003719	0.300122	1.14972	0.498177
Wdr26	ENSRNOG00000003723	7.2575	2.89812	0.0945915
Mrpl27	ENSRNOG00000003724	4.68207	-1.05079	0.733625
Xylt2	ENSRNOG00000003728	0.0768506	-3.67816	0.0499737
Nptx1	ENSRNOG00000003741	10.6318	1.89079	0.204704
Cdkl5	ENSRNOG00000003742	1.73035	3.84454	0.0686752
Dars	ENSRNOG00000003743	4.20309	1.67397	0.484918
Atf3	ENSRNOG00000003745	1.95124	-4.43564	0.0517104
Asna1	ENSRNOG00000003747	1.87809	-1.24648	0.641923
Xk	ENSRNOG00000003749	-0.0445062	2.01976	0.229079
Smarca1	ENSRNOG00000003762	-0.31939	-2.87986	0.0686313
Prdx4	ENSRNOG00000003763	4.52464	-7.93316	0.00266258
Rps6kc1	ENSRNOG00000003767	6.15213	1.70158	0.375341
Tmem163	ENSRNOG00000003769	0.581119	3.25703	0.078038
Csrp2	ENSRNOG00000003772	2.23083	-6.48802	0.00272619
Hmox2	ENSRNOG00000003773	1.83704	4.25987	0.0305621
Dedd	ENSRNOG00000003779	1.31798	1.55535	0.555137
Atp10b	ENSRNOG00000003781	0.184878	2.47528	0.166991
Acot9	ENSRNOG00000003782	5.01325	3.46372	0.139243
Tspan6	ENSRNOG00000003786	2.4496	2.09696	0.390113
Nmral1	ENSRNOG00000003794	-0.624988	0.853014	0.4932
Angel2	ENSRNOG00000003795	5.947	2.69531	0.227718
Mrps7	ENSRNOG00000003797	2.47998	5.26286	0.0262199
Wnt9b	ENSRNOG00000003807	0.0768506	-2.31655	0.158083
Sat1	ENSRNOG00000003809	7.53164	-3.01931	0.0734099
Nlgn3	ENSRNOG00000003812	2.96713	1.32955	0.541727
Slc25a11	ENSRNOG00000003815	7.03901	1.89214	0.256222
Tada1	ENSRNOG00000003816	2.32331	0.76082	0.724835
Rptor	ENSRNOG00000003821	1.26853	1.46106	0.495978
Slu7	ENSRNOG00000003822	0.300122	-0.377765	0.828469
Wdr75	ENSRNOG00000003825	2.54203	2.85871	0.215704
Ap3s1	ENSRNOG00000003829	5.9901	-0.204004	0.912949
Nenf	ENSRNOG00000003833	1.02582	-3.17169	0.136359
Map2k4	ENSRNOG00000003834	0.716349	0.300924	0.895539
Slc43a2	ENSRNOG00000003835	0.396878	2.87771	0.139727
Slit2	ENSRNOG00000003840	8.17504	-3.61851	0.314685
Kcnh1	ENSRNOG00000003841	5.19612	5.36703	0.0346869
Dhx15	ENSRNOG00000003844	4.31781	1.12256	0.585961
Pitpna	ENSRNOG00000003846	3.59397	4.27772	0.0507135
Gid4	ENSRNOG00000003847	7.51354	-0.58864	0.784331
Med12	ENSRNOG00000003848	-0.440747	-1.47991	0.271004
Stx8	ENSRNOG00000003849	7.83947	-0.205347	0.924408
Scoc	ENSRNOG00000003853	4.75066	2.2839	0.341488
Dnaja3	ENSRNOG00000003855	0.261092	1.01439	0.591831
Atp6ap2	ENSRNOG00000003858	5.60144	2.32388	0.235263
Gorab	ENSRNOG00000003861	3.64135	-3.70132	0.113723
LOC100910447	ENSRNOG00000003863	2.21024	1.34958	0.649922
Gipc1	ENSRNOG00000003864	3.45295	0.994442	0.721127
Tmigd1	ENSRNOG00000003865	2.09382	-0.592982	0.792783
LOC100911874	ENSRNOG00000003872	1.23228	-6.03971	0.00450946
Cpd	ENSRNOG00000003873	3.49532	1.50505	0.523227
Ocrl	ENSRNOG00000003875	2.70206	-0.0262319	0.992653
Rnf167	ENSRNOG00000003879	4.05765	1.08973	0.708292
Nit1	ENSRNOG00000003881	4.88964	2.95467	0.207462
Lgi2	ENSRNOG00000003887	-0.440747	1.19329	0.392022
Tbc1d15	ENSRNOG00000003889	3.08775	-1.23782	0.70959
Nap1l1	ENSRNOG00000003890	4.31229	2.62221	0.215739
Ccdc104	ENSRNOG00000003901	3.40138	-5.19634	0.054466
Nsf	ENSRNOG00000003905	5.05585	4.50163	0.100985
Tmem206	ENSRNOG00000003915	4.34913	3.19781	0.225837
Uck2	ENSRNOG00000003917	1.42967	-3.50566	0.219305
Rps6kb1	ENSRNOG00000003919	3.472	4.4378	0.0738392
Rab21	ENSRNOG00000003923	5.27733	0.829865	0.69954
Tmco1	ENSRNOG00000003928	6.019	-5.0256	0.0188736
Pcdh19	ENSRNOG00000003929	0.638531	3.3713	0.0704952
Arsg	ENSRNOG00000003931	3.59213	-6.77752	0.00549886
Pwwp2a	ENSRNOG00000003936	0.793118	-2.16398	0.33234
Asnsd1	ENSRNOG00000003942	3.09614	0.99258	0.750663
Llgl1	ENSRNOG00000003948	3.38686	-1.73329	0.452722
Psmc1	ENSRNOG00000003951	6.00387	-2.83853	0.188023
Spata7	ENSRNOG00000003955	2.23754	6.56964	0.00115433
Commd10	ENSRNOG00000003958	2.52822	5.06375	0.0139844
Nsmce2	ENSRNOG00000003964	2.5175	1.609	0.516447
Vmp1	ENSRNOG00000003967	6.66807	1.85197	0.367753
Tnpo2	ENSRNOG00000003970	4.13158	-0.898076	0.718988
Gosr1	ENSRNOG00000003971	2.96961	1.54341	0.591849
Cyb5r1	ENSRNOG00000003973	3.13158	-2.18764	0.427621
Pfn1	ENSRNOG00000003975	3.54728	1.81467	0.496704
Dusp1	ENSRNOG00000003977	8.3467	-0.325216	0.815923
Zranb3	ENSRNOG00000003979	3.97003	-1.03646	0.692882
Ttc1	ENSRNOG00000003980	3.13015	1.16012	0.592135
Pfdn2	ENSRNOG00000003983	4.50303	1.73579	0.412993
Tmem19	ENSRNOG00000003985	1.68388	5.44088	0.00809619
Dnajc27	ENSRNOG00000003988	4.1261	4.48999	0.0452348
Grb2	ENSRNOG00000003990	7.74725	4.15869	0.0221966
Pld5	ENSRNOG00000003997	0.21732	2.5145	0.176079
Adcy3	ENSRNOG00000003999	0.323977	2.75119	0.137317
Osgepl1	ENSRNOG00000004001	1.7819	4.13234	0.0406433
Dusp10	ENSRNOG00000004003	2.77011	-6.22303	0.0413981
Dnajb9	ENSRNOG00000004006	4.44855	-3.5862	0.100261
Chmp6	ENSRNOG00000004014	1.29488	-0.452719	0.850485
Msl3	ENSRNOG00000004016	3.48109	-2.88872	0.222967
Phlda1	ENSRNOG00000004019	1.27063	1.9803	0.335691
Atp2b1	ENSRNOG00000004026	8.37051	2.65066	0.0754847
Aldh9a1	ENSRNOG00000004027	2.92889	-1.64717	0.556015
2310067B10Rik	ENSRNOG00000004032	2.55416	7.22466	0.000494635
Sema6a	ENSRNOG00000004033	0.109662	2.29379	0.203152
Snx12	ENSRNOG00000004036	1.00108	4.09857	0.0345062
Lrrk2	ENSRNOG00000004048	2.83636	5.98501	0.00863772
Baiap2	ENSRNOG00000004049	5.27562	4.39562	0.0473778
Ccdc88a	ENSRNOG00000004057	1.90247	0.579082	0.811511
Ptrhd1	ENSRNOG00000004059	0.000636908	2.06979	0.234417
Calm1	ENSRNOG00000004060	10.4918	0.431296	0.636001
Pnn	ENSRNOG00000004061	1.03235	0.612906	0.772321
Nrcam	ENSRNOG00000004067	7.65679	0.635482	0.669775
Ncoa1	ENSRNOG00000004068	7.63212	0.327394	0.823151
Kcnc2	ENSRNOG00000004077	5.02951	5.10031	0.0192654
Zc3h14	ENSRNOG00000004083	2.67812	3.72298	0.129003
Fam84a	ENSRNOG00000004084	5.8475	3.53709	0.135583
Tcaim	ENSRNOG00000004085	0.139735	2.36487	0.178286
Enpp2	ENSRNOG00000004089	3.46371	0.984381	0.684759
AABR07016056.1	ENSRNOG00000004090	3.4277	2.63904	0.231836
Cwc25	ENSRNOG00000004091	1.27684	0.765755	0.688163
Rhot1	ENSRNOG00000004093	5.73677	-0.0629481	0.97345
Ptger1	ENSRNOG00000004094	-0.31939	-1.74912	0.23266
R3hdm1	ENSRNOG00000004099	6.40166	2.31079	0.201756
Trappc6b	ENSRNOG00000004103	3.2755	5.28345	0.0202121
Rpl23	ENSRNOG00000004107	4.9849	-1.08326	0.594998
Zfpm2	ENSRNOG00000004109	3.37241	3.29135	0.121663
Trib2	ENSRNOG00000004110	5.01836	4.72158	0.0370686
Kcnv1	ENSRNOG00000004117	5.41477	4.78609	0.0253008
Frmpd4	ENSRNOG00000004118	0.941708	-2.52176	0.315258
AABR07021840.1	ENSRNOG00000004127	2.82823	2.66521	0.273439
Anapc4	ENSRNOG00000004130	6.3028	0.420525	0.827984
Pkn1	ENSRNOG00000004131	1.22947	3.03983	0.117727
Lasp1	ENSRNOG00000004132	3.41199	-0.966874	0.66917
Slc7a3	ENSRNOG00000004133	0.261092	0.890085	0.612096
RGD1311745	ENSRNOG00000004135	1.80055	0.18681	0.943593
Ndel1	ENSRNOG00000004139	5.49645	2.56649	0.293414
Pacrgl	ENSRNOG00000004140	-0.440747	-1.39527	0.308849
Vasn	ENSRNOG00000004141	0.778689	-0.280236	0.902539
Adipor1	ENSRNOG00000004143	6.32608	0.00310429	0.99857
AABR07001435.1	ENSRNOG00000004144	0.445333	-1.81616	0.381138
Abca8a	ENSRNOG00000004147	0.657333	-3.32482	0.0852162
Cdk17	ENSRNOG00000004148	5.83439	2.37867	0.225438
Lrp12	ENSRNOG00000004152	2.12272	1.36376	0.519358
Hdac9	ENSRNOG00000004158	2.42949	-1.47201	0.522133
Flii	ENSRNOG00000004159	5.79836	3.26737	0.171447
Prps2	ENSRNOG00000004160	4.84305	-1.48572	0.465858
Mtif2	ENSRNOG00000004161	3.33771	1.92417	0.386035
Pfkfb2	ENSRNOG00000004162	4.32886	-2.35312	0.469401
Slc35e4	ENSRNOG00000004168	2.43199	2.27156	0.276316
Fzr1	ENSRNOG00000004169	1.33795	-0.0044751	0.998473
Dnah9	ENSRNOG00000004171	3.20349	-5.82119	0.0353938
Pdk2	ENSRNOG00000004172	0.960962	0.177719	0.940461
Fam19a2	ENSRNOG00000004180	0.469254	3.03236	0.0966798
Sdccag8	ENSRNOG00000004181	4.27837	5.5004	0.0115995
Ccdc59	ENSRNOG00000004183	2.60244	-5.80671	0.0325131
Mon2	ENSRNOG00000004185	1.62759	1.9551	0.362097
Snx13	ENSRNOG00000004186	-0.256505	-0.40557	0.76935
Helb	ENSRNOG00000004189	-0.0445062	0.0377013	0.980779
Klhl12	ENSRNOG00000004193	5.93202	1.84113	0.354517
Rps29	ENSRNOG00000004196	2.52248	-3.885	0.137439
Stxbp6	ENSRNOG00000004198	0.261092	1.11504	0.497624
Sybu	ENSRNOG00000004200	4.43118	0.517247	0.816088
Rims2	ENSRNOG00000004201	4.12828	1.6379	0.471748
Glrx5	ENSRNOG00000004206	5.01755	-1.38331	0.570538
Crim1	ENSRNOG00000004208	4.57763	1.07512	0.66489
Fbxw9	ENSRNOG00000004212	4.31471	2.26708	0.31886
Rpl26	ENSRNOG00000004214	5.19741	0.214259	0.918032
Klhl28	ENSRNOG00000004218	2.78527	2.88663	0.223409
Dhps	ENSRNOG00000004219	4.93144	2.15815	0.491273
Ebag9	ENSRNOG00000004220	1.30185	2.97602	0.139671
G2e3	ENSRNOG00000004232	2.41578	4.25765	0.0434086
Mgat2	ENSRNOG00000004234	4.00549	4.93108	0.0227568
Mgst3	ENSRNOG00000004245	4.47306	2.42207	0.296266
Spag7	ENSRNOG00000004246	-0.135149	1.83675	0.258578
Tlr7	ENSRNOG00000004249	0.63611	1.64487	0.384356
Eif3h	ENSRNOG00000004252	4.44855	0.54781	0.789247
Usf1	ENSRNOG00000004255	1.96062	-2.2175	0.376034
Ctps2	ENSRNOG00000004257	3.16139	-1.70282	0.500675
Dohh	ENSRNOG00000004259	1.10273	0.344172	0.876126
Ints7	ENSRNOG00000004263	4.06002	0.633122	0.771528
Zfp386	ENSRNOG00000004268	-0.624988	0.853014	0.4932
Myt1l	ENSRNOG00000004269	0.941708	3.98049	0.0432485
Egfl6	ENSRNOG00000004275	1.53688	-5.14764	0.0359802
Adgra3	ENSRNOG00000004279	0.735287	-1.17019	0.621813
Cobl	ENSRNOG00000004281	5.2683	5.01701	0.0178515
Arl4a	ENSRNOG00000004282	-0.135149	-0.700658	0.659297
Camta2	ENSRNOG00000004283	4.26271	4.07766	0.0562862
Btg1	ENSRNOG00000004284	6.68241	-1.65212	0.350658
Wdr83	ENSRNOG00000004287	0.708487	-3.30235	0.152928
Ptrh2	ENSRNOG00000004288	2.7032	-0.878838	0.716393
Grb10	ENSRNOG00000004290	7.04298	-1.52242	0.377834
Cltc	ENSRNOG00000004291	8.55871	0.690524	0.606027
Sptssa	ENSRNOG00000004292	4.52822	-1.40274	0.608485
Gtf2a1	ENSRNOG00000004300	2.24407	-1.29254	0.630953
Dcaf13	ENSRNOG00000004301	2.07115	6.23501	0.00197721
Timp3	ENSRNOG00000004303	0.0768506	-2.03974	0.213318
Syap1	ENSRNOG00000004304	4.39247	-0.254341	0.910595
Zbtb39	ENSRNOG00000004306	0.261092	-1.38202	0.407974
Tor3a	ENSRNOG00000004307	0.960962	4.01471	0.0389689
Caskin2	ENSRNOG00000004310	6.01245	-7.26093	0.0288429
Tmbim4	ENSRNOG00000004312	3.47717	5.14291	0.0122583
Ppm1h	ENSRNOG00000004314	0.581119	3.25172	0.111412
Tgm4	ENSRNOG00000004320	3.82387	-1.92393	0.400935
Sh3kbp1	ENSRNOG00000004322	4.32989	0.150846	0.946538
Flywch1	ENSRNOG00000004333	7.68502	-1.19182	0.423677
Fam20b	ENSRNOG00000004337	4.68049	1.38477	0.519075
Yy1	ENSRNOG00000004339	0.139735	-0.301941	0.854063
Ahr	ENSRNOG00000004342	2.07069	3.56065	0.10432
Zdhhc3	ENSRNOG00000004344	5.41924	-0.828475	0.783138
Daam1	ENSRNOG00000004345	5.8829	-0.476345	0.80771
Ppfia2	ENSRNOG00000004353	1.3472	-0.134327	0.956796
Wars	ENSRNOG00000004359	1.66477	3.91114	0.0442716
Rps6ka5	ENSRNOG00000004362	3.38685	-2.175	0.321624
Bre	ENSRNOG00000004364	5.20602	2.90025	0.178074
Elk3	ENSRNOG00000004367	1.33411	-6.26801	0.00426326
Ddx39a	ENSRNOG00000004373	0.484363	1.39017	0.527522
Arel1	ENSRNOG00000004382	6.42584	1.48285	0.480772
Alx1	ENSRNOG00000004390	0.335337	1.32956	0.505418
Aatk	ENSRNOG00000004392	7.09397	2.71533	0.111372
Fbxw11	ENSRNOG00000004395	2.35501	2.08607	0.382586
Dlx4	ENSRNOG00000004399	2.47145	-0.366458	0.864902
Mrpl13	ENSRNOG00000004401	2.82136	-0.485895	0.822331
Slc25a32	ENSRNOG00000004403	5.01019	3.0969	0.253491
Tspan8	ENSRNOG00000004411	3.45242	-6.71284	0.0102207
Fam179b	ENSRNOG00000004415	3.90166	3.89656	0.202466
Rad21	ENSRNOG00000004420	3.56177	3.24522	0.194762
Tmem5	ENSRNOG00000004421	2.5762	0.998077	0.701075
Rabif	ENSRNOG00000004424	1.02	2.61848	0.168826
Rps27a	ENSRNOG00000004426	4.33129	-0.589339	0.780946
Cep131	ENSRNOG00000004430	-0.624988	-0.621749	0.588309
Map2k6	ENSRNOG00000004437	3.99937	2.90203	0.167503
Cntn1	ENSRNOG00000004438	5.19218	-2.49313	0.226234
RGD1311756	ENSRNOG00000004442	-0.31939	-1.66448	0.265038
E2f6	ENSRNOG00000004449	0.372498	-1.3916	0.48974
Sdr9c7	ENSRNOG00000004459	3.46387	1.70951	0.429606
Sel1l	ENSRNOG00000004464	4.77808	-0.0724633	0.971239
Polr3h	ENSRNOG00000004471	-0.440747	-0.60912	0.646801
Klhdc2	ENSRNOG00000004474	3.32069	3.50728	0.151563
Wif1	ENSRNOG00000004476	1.03956	-4.04024	0.125597
Ublcp1	ENSRNOG00000004477	6.7154	0.462993	0.788933
Aurka	ENSRNOG00000004479	5.10839	0.447833	0.847788
Adss	ENSRNOG00000004481	3.5461	1.96074	0.390813
Ptprr	ENSRNOG00000004483	4.17741	3.87475	0.147747
Mterfd1	ENSRNOG00000004492	0.696362	0.183052	0.928035
Tasp1	ENSRNOG00000004493	-0.135149	-0.832605	0.567896
Lta4h	ENSRNOG00000004494	3.8401	4.17559	0.0918328
Rock2	ENSRNOG00000004496	10.8086	-2.0243	0.223143
Myc	ENSRNOG00000004500	0.261092	-4.08031	0.033485
L3hypdh	ENSRNOG00000004503	3.41712	0.368764	0.898497
Eapp	ENSRNOG00000004509	0.778689	-1.07726	0.620031
Slc35b1	ENSRNOG00000004510	6.88005	-2.31987	0.255976
Pes1	ENSRNOG00000004515	2.61333	-2.19827	0.475176
Itgbl1	ENSRNOG00000004516	-0.624988	0.853014	0.4932
Igf1	ENSRNOG00000004517	0.261092	-1.13729	0.505604
Cacnb1	ENSRNOG00000004518	3.96094	1.85706	0.519951
Atg2b	ENSRNOG00000004519	4.56429	-4.29525	0.139639
Wdr60	ENSRNOG00000004520	-0.256505	-3.09633	0.0584769
Prpf39	ENSRNOG00000004521	0.919159	-0.817075	0.703026
Desi2	ENSRNOG00000004524	2.8516	-1.51381	0.642289
Cox7a2l	ENSRNOG00000004526	5.30641	1.01649	0.599597
Fam69b	ENSRNOG00000004532	4.27691	0.489702	0.824563
Spdya	ENSRNOG00000004534	0.932216	1.08609	0.601628
Rxrg	ENSRNOG00000004537	1.85061	1.1944	0.648212
Brd1	ENSRNOG00000004538	5.63676	2.18901	0.26913
Ttc8	ENSRNOG00000004542	-0.0445062	1.99709	0.231901
Ube2e3	ENSRNOG00000004544	5.83995	3.57331	0.153499
Dhx40	ENSRNOG00000004549	1.1771	-2.66486	0.318114
Cox20	ENSRNOG00000004553	3.43982	3.13772	0.144301
Sec14l4	ENSRNOG00000004555	3.81302	0.146871	0.946133
Dcaf5	ENSRNOG00000004556	2.66153	-0.951651	0.745138
Cacna1b	ENSRNOG00000004560	1.67595	5.44019	0.00677949
Sec24a	ENSRNOG00000004563	1.24237	0.0340365	0.98973
Ofd1	ENSRNOG00000004574	1.29761	1.52344	0.462017
Fez2	ENSRNOG00000004577	1.00196	0.0495843	0.981911
Zdhhc9	ENSRNOG00000004581	6.74169	0.265354	0.919388
Galnt16	ENSRNOG00000004589	5.81532	3.70473	0.103683
Pou6f1	ENSRNOG00000004595	1.65926	-3.57473	0.233999
Rnf145	ENSRNOG00000004602	5.89211	-0.884639	0.703815
Slc38a10	ENSRNOG00000004604	-0.31939	-0.379426	0.79122
Pam16	ENSRNOG00000004608	5.14219	4.47904	0.0843684
Ppp1cb	ENSRNOG00000004612	8.40626	-0.0296223	0.983537
Gpm6b	ENSRNOG00000004613	5.53982	-4.15799	0.0482206
Npm1	ENSRNOG00000004616	2.16556	2.06756	0.387981
Rtn4	ENSRNOG00000004621	6.26265	0.981973	0.588678
Rnd3	ENSRNOG00000004624	4.12382	3.10706	0.154114
Fkbp3	ENSRNOG00000004629	5.17929	0.079812	0.968042
Fbxo7	ENSRNOG00000004637	3.60746	-0.415606	0.882803
Traf6	ENSRNOG00000004639	1.70768	-6.99371	0.00134654
Mtfp1	ENSRNOG00000004640	1.62976	5.37976	0.00992177
Sstr4	ENSRNOG00000004641	2.37947	0.314477	0.909006
Galnt5	ENSRNOG00000004645	1.90894	-1.93731	0.388849
Begain	ENSRNOG00000004650	8.34785	1.16266	0.635905
Creld2	ENSRNOG00000004659	1.08006	-5.69138	0.0239639
Fzd6	ENSRNOG00000004660	2.52307	-0.467442	0.828578
Sec14l2	ENSRNOG00000004672	7.04031	1.27434	0.5607
Pak3	ENSRNOG00000004676	6.69362	-0.308171	0.889002
Zeb2	ENSRNOG00000004677	4.11145	-7.03061	0.0090462
Kif5c	ENSRNOG00000004680	7.89749	-1.45557	0.32752
Eny2	ENSRNOG00000004681	1.4655	3.50836	0.0701828
Spop	ENSRNOG00000004686	4.72444	1.4213	0.540364
Thbd	ENSRNOG00000004687	0.554716	-3.15835	0.173982
Rbfox2	ENSRNOG00000004688	0.738958	3.57138	0.075786
Celf5	ENSRNOG00000004695	6.21974	4.69926	0.0300931
Arhgap5	ENSRNOG00000004696	4.70998	2.2293	0.348991
Baalc	ENSRNOG00000004697	6.36175	2.449	0.218354
Nxt1	ENSRNOG00000004700	1.66477	-1.3154	0.547379
Muc15	ENSRNOG00000004703	-0.624988	-0.913943	0.44715
Foxn3	ENSRNOG00000004709	3.51631	-0.115896	0.966519
Rbks	ENSRNOG00000004710	1.47202	-2.78949	0.331237
Mta1	ENSRNOG00000004711	5.52836	-0.58443	0.770102
Pp2d1	ENSRNOG00000004719	2.2471	1.19528	0.594565
Fcf1	ENSRNOG00000004723	3.84458	1.9453	0.358001
Meis2	ENSRNOG00000004730	4.17854	1.58057	0.484998
Ano3	ENSRNOG00000004731	5.93723	1.57017	0.420589
Ralgps2	ENSRNOG00000004736	-0.31939	0.0728641	0.957991
Cd48	ENSRNOG00000004737	1.87536	-5.71106	0.0128154
Mmadhc	ENSRNOG00000004740	3.35529	1.94924	0.368062
Rpl19	ENSRNOG00000004741	7.38788	0.323444	0.84376
Chp1	ENSRNOG00000004742	3.08669	4.65842	0.0376045
Jkamp	ENSRNOG00000004751	2.62891	4.79802	0.0212095
Nalcn	ENSRNOG00000004752	1.09872	4.28677	0.0307559
Commd9	ENSRNOG00000004755	6.03979	-1.50403	0.541499
Sirpa	ENSRNOG00000004763	8.19763	-0.424194	0.769989
Yaf2	ENSRNOG00000004773	3.29687	0.820699	0.714027
Ccdc175	ENSRNOG00000004774	1.36758	4.83222	0.0148845
Cstf1	ENSRNOG00000004775	3.37731	2.07021	0.448739
Ftsj1	ENSRNOG00000004776	0.925747	-0.182486	0.934259
Crmp1	ENSRNOG00000004781	5.56237	4.32038	0.0380227
Ndufaf5	ENSRNOG00000004784	0.351734	2.79113	0.130101
AABR07053185.1	ENSRNOG00000004787	0.941708	-1.8038	0.4102
Arf6	ENSRNOG00000004791	1.55557	2.65077	0.254779
Ncln	ENSRNOG00000004793	1.77823	-2.25592	0.361073
Rtn1	ENSRNOG00000004794	10.0989	1.15116	0.258915
Stac2	ENSRNOG00000004805	2.29871	-1.32989	0.654719
Arf2	ENSRNOG00000004807	2.99831	8.02783	0.000494692
Plcb1	ENSRNOG00000004810	1.43262	4.95866	0.0126804
Sema6d	ENSRNOG00000004812	3.65929	-0.730797	0.734083
Rtcb	ENSRNOG00000004813	3.0125	2.59132	0.295827
Tceb2	ENSRNOG00000004814	2.20915	1.05707	0.668221
Porcn	ENSRNOG00000004819	1.89477	0.904683	0.684039
Sar1b	ENSRNOG00000004820	3.52411	0.968833	0.667681
Sos2	ENSRNOG00000004826	8.2192	-0.760045	0.663271
Papola	ENSRNOG00000004827	6.46909	2.65744	0.176597
Acvr1c	ENSRNOG00000004828	0.926833	3.95156	0.0518235
Immp1l	ENSRNOG00000004829	5.00758	-4.85174	0.0409939
Arid2	ENSRNOG00000004831	1.60298	-1.14058	0.705875
B4galnt1	ENSRNOG00000004839	1.25525	2.88332	0.150497
Akap6	ENSRNOG00000004841	3.6263	4.46634	0.0751227
Med30	ENSRNOG00000004844	1.73661	2.40104	0.264706
Atp6v1c1	ENSRNOG00000004846	9.44474	-1.09787	0.334934
Mpped2	ENSRNOG00000004863	7.52415	-0.276615	0.907536
Prpf40a	ENSRNOG00000004864	1.21513	4.52172	0.0217629
Dyrk3	ENSRNOG00000004870	4.34022	4.93863	0.0859305
Flrt3	ENSRNOG00000004874	3.65789	1.29182	0.553446
Erh	ENSRNOG00000004883	4.68012	-0.225851	0.912751
Arl14ep	ENSRNOG00000004891	-0.440747	-0.930622	0.448522
Atp5s	ENSRNOG00000004893	0.661884	-1.31639	0.543167
Kcns3	ENSRNOG00000004899	0.688047	3.46933	0.0728048
Slc4a1ap	ENSRNOG00000004901	1.85402	3.69395	0.0668469
Ebp	ENSRNOG00000004903	2.29433	5.21123	0.0136567
Pa2g4	ENSRNOG00000004904	4.65589	3.01971	0.168897
Smc6	ENSRNOG00000004908	3.86244	-5.79254	0.0746508
Cnot2	ENSRNOG00000004909	1.20172	0.916198	0.67211
Eif2d	ENSRNOG00000004910	3.72396	2.74413	0.264698
Rasal2	ENSRNOG00000004917	1.66181	5.38491	0.011401
Kcna4	ENSRNOG00000004918	2.79617	1.75678	0.428165
Nusap1	ENSRNOG00000004921	2.7283	0.639315	0.770587
Ppp1r12a	ENSRNOG00000004925	5.17195	-0.732355	0.732517
Mettl15	ENSRNOG00000004926	1.55784	-0.208134	0.923004
Sel1l3	ENSRNOG00000004932	0.351734	0.80861	0.678149
Sdc2	ENSRNOG00000004936	4.18469	0.995846	0.698301
Rnf215	ENSRNOG00000004940	0.657333	1.67427	0.402206
Actr2	ENSRNOG00000004959	11.3722	-0.742356	0.368111
Erbb3	ENSRNOG00000004964	0.911318	-1.8468	0.380182
Snrpb2	ENSRNOG00000004967	1.65798	2.18906	0.250682
Ncapg2	ENSRNOG00000004968	0.820352	-5.21646	0.0123722
Txlng	ENSRNOG00000004971	1.13153	-1.11228	0.633805
Upp1	ENSRNOG00000004972	0.300122	-4.17511	0.0288358
Ppp2r5c	ENSRNOG00000004973	1.78068	1.80322	0.425257
Rangrf	ENSRNOG00000004980	0.306235	-0.601539	0.758229
Rab1a	ENSRNOG00000004992	6.53967	2.28787	0.23329
Zcrb1	ENSRNOG00000004996	2.88028	0.0301725	0.990305
Jakmip1	ENSRNOG00000004998	3.33961	7.08157	0.000846015
Ptprn2	ENSRNOG00000005003	4.62047	2.92428	0.313694
Ndufaf1	ENSRNOG00000005006	1.34037	2.21856	0.268114
Scn3a	ENSRNOG00000005007	3.36523	0.888886	0.686835
Utp14a	ENSRNOG00000005012	2.02336	-0.946066	0.725285
Rabep1	ENSRNOG00000005015	3.51923	3.22333	0.14665
Tmed4	ENSRNOG00000005016	6.39688	-1.20539	0.521096
Scn2a	ENSRNOG00000005018	7.18489	2.41931	0.162545
Orc4	ENSRNOG00000005021	0.820352	3.7354	0.0509279
Cdkn2aipnl	ENSRNOG00000005024	2.88481	3.28248	0.169552
Surf6	ENSRNOG00000005031	6.81928	0.468425	0.844704
Acvr1	ENSRNOG00000005033	2.65276	-0.0644228	0.977246
Arhgef25	ENSRNOG00000005034	5.93036	1.19048	0.578967
Tfpi	ENSRNOG00000005039	2.16324	3.24668	0.140374
Crip2	ENSRNOG00000005041	4.72168	-0.00649723	0.997939
Ppp2r5e	ENSRNOG00000005045	4.65789	0.923054	0.687916
Tspan13	ENSRNOG00000005046	9.4957	-0.708585	0.51667
Slc39a9	ENSRNOG00000005052	6.62179	0.974657	0.568968
Egln3	ENSRNOG00000005053	2.9206	5.79226	0.00640584
Lpcat4	ENSRNOG00000005058	0.864207	3.82265	0.0487505
Dlst	ENSRNOG00000005061	4.67712	-3.81038	0.114672
Atl1	ENSRNOG00000005063	3.01575	3.18394	0.16161
Ube2b	ENSRNOG00000005064	5.38077	2.58757	0.229461
LOC100911319	ENSRNOG00000005067	6.43395	-4.45901	0.0354763
Rtfdc1	ENSRNOG00000005083	1.87536	0.251203	0.912753
Cebpz	ENSRNOG00000005087	1.27146	-2.26078	0.316115
Bzw2	ENSRNOG00000005096	3.16373	3.30569	0.117227
Ctage5	ENSRNOG00000005101	1.08638	0.711606	0.742177
Ccdc53	ENSRNOG00000005102	0.939621	3.9758	0.0414914
Wfs1	ENSRNOG00000005108	4.94195	2.20801	0.268525
Nutm1	ENSRNOG00000005111	-0.624988	0.853014	0.4932
AABR07054332.1	ENSRNOG00000005116	-0.440747	-1.39527	0.308849
Emc2	ENSRNOG00000005123	2.3109	3.50858	0.0790655
Plekhh2	ENSRNOG00000005124	1.17164	4.41549	0.066134
Pqlc3	ENSRNOG00000005126	0.139735	-1.31794	0.445411
Dtx3	ENSRNOG00000005129	1.73901	-0.0471093	0.987772
Ogdh	ENSRNOG00000005130	4.92062	0.237132	0.907385
Mapt	ENSRNOG00000005133	9.42103	2.60786	0.103516
Pip4k2c	ENSRNOG00000005138	6.64636	-0.674917	0.746904
Hus1	ENSRNOG00000005141	6.2641	2.56195	0.183602
Tmem18	ENSRNOG00000005144	3.76241	2.10946	0.431448
Sacm1l	ENSRNOG00000005149	5.18084	1.39653	0.498221
Dync2li1	ENSRNOG00000005151	2.70553	0.510473	0.866805
LOC690422	ENSRNOG00000005153	3.13426	-0.95503	0.69117
Rbbp7	ENSRNOG00000005157	6.88222	1.68081	0.349884
Slc24a5	ENSRNOG00000005158	3.88625	1.25566	0.549964
Fam135b	ENSRNOG00000005159	-0.624988	-0.70639	0.527432
Sgpp1	ENSRNOG00000005175	2.71387	2.06817	0.403307
Map7d2	ENSRNOG00000005176	6.97373	1.80685	0.295274
Tp53i3	ENSRNOG00000005177	0.000636908	2.06979	0.234417
Rtf1	ENSRNOG00000005183	4.24786	4.41319	0.0726724
Nop10	ENSRNOG00000005184	4.479	1.70317	0.425641
Nipal2	ENSRNOG00000005190	3.29264	-0.431019	0.886234
Pfas	ENSRNOG00000005193	5.28092	1.57313	0.428267
Cst3	ENSRNOG00000005195	12.133	-4.25011	0.000415283
Slc12a6	ENSRNOG00000005196	4.89642	3.58285	0.13071
LOC100361694	ENSRNOG00000005203	2.87689	-0.0806199	0.971525
Spred1	ENSRNOG00000005209	1.26642	-2.48924	0.271867
Plek	ENSRNOG00000005214	0.747975	-1.2339	0.543592
Klhl4	ENSRNOG00000005215	-0.0445062	-0.0929261	0.946317
Sf3a1	ENSRNOG00000005218	1.96959	2.19185	0.353305
Hnmt	ENSRNOG00000005223	1.69886	1.38822	0.631234
Gnptab	ENSRNOG00000005228	2.84965	-1.74284	0.473742
Gxylt1	ENSRNOG00000005234	0.535976	3.16914	0.0893859
Slc1a4	ENSRNOG00000005248	7.7249	-4.02233	0.0202102
Snx6	ENSRNOG00000005249	3.00605	4.49381	0.0461386
Zc3h15	ENSRNOG00000005256	8.75567	-2.57611	0.0583807
Prkaca	ENSRNOG00000005257	4.71093	3.08878	0.133749
Myef2	ENSRNOG00000005258	0.396878	1.14053	0.542093
Acp1	ENSRNOG00000005260	3.84412	2.29319	0.349447
Fbxl5	ENSRNOG00000005261	2.99722	4.07428	0.0436264
LOC688906	ENSRNOG00000005263	3.57062	3.74555	0.135705
Sav1	ENSRNOG00000005264	1.29683	2.13567	0.313515
Sycp3	ENSRNOG00000005270	1.23367	-3.04248	0.260181
Rapgef5	ENSRNOG00000005271	5.94896	4.00419	0.0521153
Vrk1	ENSRNOG00000005274	0.995742	-0.148966	0.944341
Csnk2a1	ENSRNOG00000005276	3.36538	0.482848	0.83297
Trhde	ENSRNOG00000005278	1.29016	2.95892	0.262236
Ndufaf7	ENSRNOG00000005279	1.12595	2.83188	0.133867
Stx16	ENSRNOG00000005281	4.87024	6.5773	0.00700612
Itpka	ENSRNOG00000005284	5.66148	4.76675	0.0377821
Fbxo33	ENSRNOG00000005285	1.68521	3.7538	0.0761298
Coch	ENSRNOG00000005286	0.918049	0.0264351	0.991356
Ywhae	ENSRNOG00000005290	11.5379	-0.77427	0.321853
Slc38a1	ENSRNOG00000005291	0.0768506	2.24712	0.190605
Kif5a	ENSRNOG00000005299	11.0118	2.35471	0.0270047
Eif2b4	ENSRNOG00000005301	1.62634	5.37056	0.00957457
Tbc1d25	ENSRNOG00000005303	1.58856	2.6127	0.216203
Slc4a10	ENSRNOG00000005307	4.52641	4.23633	0.0455551
Tmx2	ENSRNOG00000005308	1.38778	0.115698	0.965681
Scn8a	ENSRNOG00000005309	3.95496	-6.44981	0.00885605
Cul1	ENSRNOG00000005310	7.01148	2.79252	0.172508
Syne2	ENSRNOG00000005323	4.54063	-3.4357	0.118276
Cnrip1	ENSRNOG00000005326	7.08002	1.38358	0.387869
Crebbp	ENSRNOG00000005330	5.74211	1.35107	0.500588
Csdc2	ENSRNOG00000005332	0.820352	-1.22262	0.594025
Azin1	ENSRNOG00000005333	5.9083	-1.35583	0.478154
Acvr2a	ENSRNOG00000005334	1.34989	1.61984	0.54162
Galnt13	ENSRNOG00000005335	0.469254	3.03505	0.0973154
Rassf5	ENSRNOG00000005342	3.98111	-1.2823	0.635394
Nol10	ENSRNOG00000005344	0.281135	2.64388	0.161976
Vsnl1	ENSRNOG00000005345	7.65977	2.60175	0.120498
Tmem128	ENSRNOG00000005346	7.11753	-1.23097	0.482822
Fjx1	ENSRNOG00000005347	1.23321	1.91167	0.466347
Pamr1	ENSRNOG00000005348	4.33387	1.68868	0.450685
Pwp1	ENSRNOG00000005350	1.37921	4.84149	0.0178266
Rybp	ENSRNOG00000005353	0.50937	-1.6641	0.438553
Ncstn	ENSRNOG00000005355	3.73516	2.47053	0.296322
Ctc1	ENSRNOG00000005357	1.14422	-2.19792	0.408157
Pmm1	ENSRNOG00000005358	0.797802	3.69053	0.0529618
Dhrs7b	ENSRNOG00000005360	1.62852	5.3408	0.00810842
Rab3ip	ENSRNOG00000005362	4.43454	3.31434	0.160065
Kcnip1	ENSRNOG00000005365	3.35428	-2.94018	0.292824
Klhl29	ENSRNOG00000005371	5.09544	1.58522	0.471739
Lyar	ENSRNOG00000005374	0.224994	-4.00759	0.0352176
Tmem11	ENSRNOG00000005377	0.139735	0.247349	0.870557
Gna15	ENSRNOG00000005378	2.38496	1.03777	0.639633
Kitlg	ENSRNOG00000005386	-0.440747	1.19329	0.392022
Rbm3	ENSRNOG00000005387	2.36871	0.0897736	0.967881
Rassf3	ENSRNOG00000005388	3.98983	-2.43651	0.317187
Ppp2ca	ENSRNOG00000005389	3.18817	0.0192544	0.993198
Nup210	ENSRNOG00000005390	6.0863	-2.34495	0.403598
Prex2	ENSRNOG00000005391	-0.440747	-1.47991	0.271004
Sertad2	ENSRNOG00000005393	1.77915	4.15333	0.0428265
Maea	ENSRNOG00000005397	5.44105	-1.68054	0.408135
Clint1	ENSRNOG00000005406	4.76745	-0.221754	0.912514
LOC100911674	ENSRNOG00000005408	2.96531	-0.236198	0.920884
Aftph	ENSRNOG00000005411	2.17128	4.31316	0.0375604
Trap1	ENSRNOG00000005418	3.78825	2.11991	0.313445
Odc1	ENSRNOG00000005424	3.8165	2.78986	0.277004
Ctbp1	ENSRNOG00000005428	11.093	-0.392676	0.658062
Shq1	ENSRNOG00000005433	0.424111	0.803759	0.645718
Sptbn1	ENSRNOG00000005434	7.91286	-1.00629	0.474945
Hrsp12	ENSRNOG00000005437	2.27857	-4.2792	0.0592309
Pcsk2	ENSRNOG00000005438	6.04294	4.99736	0.0217
Gna11	ENSRNOG00000005446	1.82779	1.86427	0.377558
Lamp5	ENSRNOG00000005457	4.26386	1.43691	0.492999
Lgalsl	ENSRNOG00000005464	7.27477	-1.3785	0.369018
Rbm28	ENSRNOG00000005468	5.27113	2.05126	0.390403
Fkbp9	ENSRNOG00000005478	5.05764	-3.21275	0.123109
Slc1a2	ENSRNOG00000005479	0.941708	-2.2705	0.366117
Ybx3	ENSRNOG00000005480	2.60863	3.22502	0.161353
Sap30bp	ENSRNOG00000005482	2.9042	0.353361	0.872789
Rpap1	ENSRNOG00000005483	1.28897	4.68635	0.0253805
Best3	ENSRNOG00000005491	2.65208	-1.33058	0.542583
Hpcal1	ENSRNOG00000005492	2.69342	2.77681	0.252823
Ing3	ENSRNOG00000005496	0.738958	3.57138	0.075786
Ankib1	ENSRNOG00000005502	2.85173	0.079108	0.974239
Pkp4	ENSRNOG00000005504	4.90028	-1.0875	0.62685
Wbp11	ENSRNOG00000005505	-0.135149	1.83675	0.258578
Pak7	ENSRNOG00000005509	4.67532	6.2231	0.00457315
Ndufa4	ENSRNOG00000005512	8.24475	1.08169	0.420409
Srsf5	ENSRNOG00000005513	8.5261	-4.00045	0.0714786
Rhbdl3	ENSRNOG00000005515	2.43558	1.26584	0.616651
Grm3	ENSRNOG00000005519	7.25814	0.126116	0.936034
Pno1	ENSRNOG00000005524	1.61814	2.16258	0.364153
Tbk1	ENSRNOG00000005528	2.1302	6.32971	0.00214479
Psmd11	ENSRNOG00000005538	2.77862	4.49924	0.0363471
AABR07057196.1	ENSRNOG00000005546	-0.228748	0.131306	0.918445
Lrfn5	ENSRNOG00000005550	3.01621	5.23562	0.0135845
Derl1	ENSRNOG00000005551	5.61497	5.13366	0.0344888
Snrpf	ENSRNOG00000005556	2.50307	-2.9631	0.178799
Brinp1	ENSRNOG00000005561	2.56562	5.74233	0.00501065
Ubn2	ENSRNOG00000005564	2.68836	2.21314	0.38215
Pcnxl4	ENSRNOG00000005568	4.26937	2.64604	0.237838
Phospho1	ENSRNOG00000005569	0.0881225	0.0302627	0.985356
Rpia	ENSRNOG00000005576	0.261092	2.62606	0.150042
Desi1	ENSRNOG00000005577	3.06681	-0.959636	0.683044
Suclg1	ENSRNOG00000005587	4.21785	2.39458	0.306833
Dhrs7	ENSRNOG00000005589	3.05778	-0.165903	0.939682
Brinp2	ENSRNOG00000005592	6.59024	2.32645	0.284766
Nr4a2	ENSRNOG00000005600	0.962931	-0.154432	0.948507
Med1	ENSRNOG00000005606	2.81305	1.67274	0.512009
Neurod1	ENSRNOG00000005609	0.473091	3.04547	0.103262
Yipf4	ENSRNOG00000005610	4.6207	-0.969923	0.653089
Txn2	ENSRNOG00000005614	1.91305	2.75867	0.207724
Fmc1	ENSRNOG00000005618	4.65322	-3.09436	0.151789
Lcp2	ENSRNOG00000005620	2.16786	1.42265	0.604672
Ankmy2	ENSRNOG00000005623	5.11872	2.27967	0.297279
Zfx	ENSRNOG00000005624	1.41847	-1.95796	0.472693
Zbtb49	ENSRNOG00000005633	0.696362	-2.15545	0.355273
Lingo2	ENSRNOG00000005634	1.47936	5.07314	0.0151853
Fbxl4	ENSRNOG00000005641	-0.228748	-1.29487	0.365088
Frs2	ENSRNOG00000005642	4.05361	0.294534	0.91493
Cntn4	ENSRNOG00000005652	3.83929	4.19709	0.0831741
Aurkb	ENSRNOG00000005659	3.8185	-1.47474	0.532233
Grm7	ENSRNOG00000005662	0.9479	3.98513	0.0627458
Astn1	ENSRNOG00000005667	3.75146	6.69013	0.00191733
Ndufa8	ENSRNOG00000005668	6.08057	-0.839579	0.633996
Car8	ENSRNOG00000005669	0.505902	1.34104	0.53668
Runx1t1	ENSRNOG00000005673	4.95426	3.39103	0.175805
Suclg2	ENSRNOG00000005686	5.07237	-3.38839	0.104677
Yeats4	ENSRNOG00000005689	5.73098	-5.1583	0.0195106
Lmcd1	ENSRNOG00000005690	4.02068	-3.66479	0.195801
Ndufa5	ENSRNOG00000005698	1.79707	-1.71628	0.473625
Nsg1	ENSRNOG00000005700	3.53988	6.52896	0.00179322
Arfgef1	ENSRNOG00000005703	5.9631	0.379264	0.847475
Mmp16	ENSRNOG00000005708	1.96741	3.47681	0.0949886
Rbm7	ENSRNOG00000005710	1.32307	0.851617	0.658338
Ptprd	ENSRNOG00000005711	7.83851	0.956019	0.550082
Ccdc82	ENSRNOG00000005713	1.01748	-1.61358	0.412542
AABR07065406.1	ENSRNOG00000005718	0.793118	3.68018	0.0876169
Emc4	ENSRNOG00000005719	0.861617	1.13648	0.63104
Map3k7	ENSRNOG00000005724	0.925747	-0.218624	0.929076
Pcmtd1	ENSRNOG00000005730	4.11542	-0.0349344	0.987361
Cpsf2	ENSRNOG00000005733	3.26243	-0.510251	0.864872
Eif1ax	ENSRNOG00000005736	2.39905	1.88867	0.44278
Foxred2	ENSRNOG00000005749	3.65964	-0.0270631	0.990094
Alg13	ENSRNOG00000005753	3.368	4.25086	0.0763825
Rab22a	ENSRNOG00000005762	5.64147	1.02519	0.696694
Arl1	ENSRNOG00000005763	0.8115	1.97689	0.401026
Ap4s1	ENSRNOG00000005765	1.94915	3.4379	0.097045
Smg8	ENSRNOG00000005769	3.16332	6.65009	0.00254744
Phf14	ENSRNOG00000005775	1.79444	0.590286	0.805915
Bcl11b	ENSRNOG00000005776	0.932216	2.23987	0.256678
Cdk5rap2	ENSRNOG00000005788	1.03235	4.14557	0.0745342
RGD1306474	ENSRNOG00000005790	-0.624988	0.853014	0.4932
Aasdhppt	ENSRNOG00000005795	0.985748	1.15484	0.578427
Ctnna1	ENSRNOG00000005796	4.25405	-3.01399	0.353848
Usp24	ENSRNOG00000005802	5.70545	-0.576539	0.786569
Eif3d	ENSRNOG00000005804	2.46129	1.36733	0.610593
Arhgdib	ENSRNOG00000005809	0.696362	-3.42952	0.0760247
Katnbl1	ENSRNOG00000005814	0.690144	1.96964	0.285224
Utp20	ENSRNOG00000005823	1.01152	4.11746	0.0330446
Lyz2	ENSRNOG00000005825	4.56735	-3.13514	0.294805
Skp1	ENSRNOG00000005828	7.76223	1.28274	0.375884
Cacfd1	ENSRNOG00000005840	1.12595	-1.37017	0.490436
Erp44	ENSRNOG00000005841	4.51637	2.17045	0.371538
Aco1	ENSRNOG00000005849	8.11304	-2.23293	0.124914
Gdap1	ENSRNOG00000005850	2.44518	3.1338	0.162462
Slc30a6	ENSRNOG00000005856	0.0278705	2.16406	0.207702
Lrrc3b	ENSRNOG00000005857	0.688047	3.46933	0.0728048
Hsd11b1	ENSRNOG00000005861	3.70612	-1.02528	0.663904
Ssfa2	ENSRNOG00000005865	4.46734	-5.06077	0.0353984
Lrpprc	ENSRNOG00000005877	3.82797	2.04427	0.466969
Tle1	ENSRNOG00000005882	1.92401	2.17627	0.329342
Emc7	ENSRNOG00000005884	9.19353	-1.42311	0.497479
Serbp1	ENSRNOG00000005890	3.8527	0.658496	0.771133
Slc2a6	ENSRNOG00000005900	-0.31939	1.42162	0.344742
Cdc27	ENSRNOG00000005904	0.261092	2.61334	0.142209
Pde4b	ENSRNOG00000005905	7.66333	0.840323	0.595346
Dmtf1	ENSRNOG00000005908	2.49433	3.1554	0.168033
Ppm1a	ENSRNOG00000005916	5.56519	2.00008	0.33852
Mtmr2	ENSRNOG00000005923	0.793118	1.94845	0.344134
Dstn	ENSRNOG00000005924	8.37809	-0.53298	0.689924
Cpsf6	ENSRNOG00000005927	8.05267	0.16751	0.903781
Them6	ENSRNOG00000005929	2.05407	4.46982	0.0310796
Mlip	ENSRNOG00000005934	0.167493	2.41239	0.188132
RGD1311744	ENSRNOG00000005960	1.58856	-1.30316	0.661003
Rab2a	ENSRNOG00000005963	3.32195	4.24242	0.0619151
Nr4a3	ENSRNOG00000005964	4.07576	-0.85212	0.717776
Irak4	ENSRNOG00000005965	-0.440747	-0.60912	0.646801
Gpr176	ENSRNOG00000005971	4.93365	-1.93891	0.614602
Rpl30	ENSRNOG00000005975	5.30008	0.0680697	0.973975
Nt5c3a	ENSRNOG00000005981	4.25569	5.74129	0.00869001
C1d	ENSRNOG00000005982	4.56801	2.09028	0.312038
Etv6	ENSRNOG00000005984	0.50937	-0.947504	0.639048
Kcnma1	ENSRNOG00000005985	4.0611	1.26102	0.661722
Suox	ENSRNOG00000005987	3.1523	-1.03381	0.650862
Arl8a	ENSRNOG00000005988	5.84036	-1.49301	0.418889
Wdsub1	ENSRNOG00000005990	0.865495	-0.0881773	0.970782
Cdk12	ENSRNOG00000006000	-0.440747	-0.388891	0.774933
Luc7l2	ENSRNOG00000006001	3.86584	0.625349	0.767325
Ctnna2	ENSRNOG00000006003	2.96054	2.27135	0.378987
Phc2	ENSRNOG00000006004	4.76828	-0.726607	0.725244
G0s2	ENSRNOG00000006019	0.473091	-4.51369	0.0224955
Eif2ak4	ENSRNOG00000006027	1.64355	-4.16892	0.058194
Tubgcp6	ENSRNOG00000006028	0.594993	3.28842	0.0954351
Ptprz1	ENSRNOG00000006030	6.02901	-7.68377	0.0294851
Snap25	ENSRNOG00000006037	8.18207	-0.153813	0.917017
Rfx1	ENSRNOG00000006049	2.55083	0.945894	0.713778
Med19	ENSRNOG00000006050	7.29908	0.017898	0.991078
AABR07016841.1	ENSRNOG00000006051	3.74441	3.38923	0.121993
Sulf2	ENSRNOG00000006052	8.12032	4.45729	0.0128924
Matn2	ENSRNOG00000006060	1.57979	3.55009	0.122299
Phf21a	ENSRNOG00000006063	0.167493	-1.11064	0.508745
Aifm1	ENSRNOG00000006067	0.849725	3.79538	0.0824301
Tmem117	ENSRNOG00000006068	2.33471	0.0509075	0.985441
Eif2ak3	ENSRNOG00000006069	0.621235	1.20641	0.517911
Fez1	ENSRNOG00000006075	7.08397	-0.842695	0.58523
Snx5	ENSRNOG00000006077	5.44251	0.762916	0.711504
Lynx1	ENSRNOG00000006086	3.10772	3.68573	0.119111
Rnf20	ENSRNOG00000006087	2.77525	2.96407	0.151154
LRRTM1	ENSRNOG00000006093	2.23783	6.62686	0.00317631
Pole4	ENSRNOG00000006102	3.29425	0.686038	0.749488
Tbc1d31	ENSRNOG00000006103	0.300122	2.69383	0.131039
Jph1	ENSRNOG00000006110	4.03744	1.58676	0.506557
LOC100910867	ENSRNOG00000006114	1.31834	4.71499	0.0270112
Hk2	ENSRNOG00000006116	0.0768506	-0.299732	0.839015
Klf10	ENSRNOG00000006118	4.30154	3.64766	0.099777
Slc7a15	ENSRNOG00000006119	-0.440747	-0.930622	0.448522
Nup88	ENSRNOG00000006126	7.08515	-1.74751	0.275081
Rab5b	ENSRNOG00000006130	5.64186	0.057103	0.975307
Mettl2b	ENSRNOG00000006131	1.69488	1.71665	0.450278
Pdpk1	ENSRNOG00000006136	5.54508	2.4278	0.233506
Arid1a	ENSRNOG00000006137	5.61391	-0.745251	0.693598
Stx18	ENSRNOG00000006139	1.43421	2.30828	0.325617
Ngly1	ENSRNOG00000006143	3.02798	5.22645	0.0167098
Cntn3	ENSRNOG00000006144	0.63611	3.36556	0.0743798
Trim54	ENSRNOG00000006146	0.473091	3.0388	0.0976378
RGD1310352	ENSRNOG00000006148	7.43938	1.43964	0.402664
Dync1h1	ENSRNOG00000006178	0.139735	2.36487	0.178286
Pum2	ENSRNOG00000006180	7.50607	-1.16459	0.446265
Etaa1l1	ENSRNOG00000006185	2.12034	4.53468	0.0794225
Calu	ENSRNOG00000006197	4.94977	-1.43298	0.482201
Slc30a3	ENSRNOG00000006204	3.93433	4.4421	0.0651367
Tmem106b	ENSRNOG00000006206	5.77463	2.2584	0.28881
Mbd6	ENSRNOG00000006209	2.83227	-1.02571	0.655743
Wiz	ENSRNOG00000006217	1.00459	2.37916	0.247176
Uba3	ENSRNOG00000006221	5.60456	2.55441	0.186872
Cacng2	ENSRNOG00000006226	3.96494	5.90157	0.0336133
Ifih1	ENSRNOG00000006227	0.0768506	-3.73192	0.0414273
Pdia4	ENSRNOG00000006228	3.33126	-1.63351	0.472249
Ptpro	ENSRNOG00000006231	1.70051	-3.12693	0.178902
Nell2	ENSRNOG00000006235	9.74555	-0.321285	0.853523
Gpr37l1	ENSRNOG00000006237	4.92336	-4.06805	0.0585521
2018-03-07	ENSRNOG00000006241	1.07935	1.69027	0.400942
Lztfl1	ENSRNOG00000006244	2.14394	6.3899	0.00158277
Copa	ENSRNOG00000006247	4.03482	0.632793	0.773133
Trim37	ENSRNOG00000006248	3.72912	-0.416628	0.869864
Fam83a	ENSRNOG00000006251	-0.256505	-0.625799	0.642813
Papolg	ENSRNOG00000006261	3.20485	3.43865	0.157774
Sh2d1a	ENSRNOG00000006263	0.7144	3.52473	0.0676822
Itfg2	ENSRNOG00000006264	-0.440747	1.19329	0.392022
LOC100360491	ENSRNOG00000006283	3.82638	-2.03188	0.398228
Tlk2	ENSRNOG00000006285	3.02284	3.81446	0.0641541
Cpne3	ENSRNOG00000006298	-0.135149	-0.832605	0.567896
Gclc	ENSRNOG00000006302	0.613561	1.57033	0.482733
Mdm2	ENSRNOG00000006304	6.53151	-5.80794	0.0136204
Slc38a2	ENSRNOG00000006305	7.00291	-2.50338	0.277695
Ptges	ENSRNOG00000006320	0.828991	-5.23021	0.027716
Trpc6	ENSRNOG00000006324	1.17765	4.44798	0.0232634
Atraid	ENSRNOG00000006326	4.20062	-3.08368	0.199591
Wwp1	ENSRNOG00000006328	0.572531	1.48315	0.502567
Peli1	ENSRNOG00000006329	5.91324	0.229123	0.912529
Elovl5	ENSRNOG00000006331	0.436994	1.22309	0.5181
Txndc16	ENSRNOG00000006334	-0.624988	-0.829303	0.500235
Klhl9	ENSRNOG00000006335	3.94559	-3.00799	0.169207
Fyco1	ENSRNOG00000006336	0.869332	0.629427	0.791835
Memo1	ENSRNOG00000006340	5.15245	1.96574	0.352558
Sec61b	ENSRNOG00000006345	0.43275	2.96078	0.102982
Akap8l	ENSRNOG00000006355	1.71931	5.52572	0.00602168
Sgip1	ENSRNOG00000006357	0.800892	3.6969	0.064859
Galk1	ENSRNOG00000006359	0.109662	2.33735	0.201136
Dld	ENSRNOG00000006364	6.5747	0.819775	0.717889
Lrrn3	ENSRNOG00000006368	5.36853	-3.43484	0.147224
Alg2	ENSRNOG00000006369	7.36111	2.64551	0.343972
Vdac1	ENSRNOG00000006375	5.76394	1.00958	0.583451
Srsf6	ENSRNOG00000006380	8.59758	-2.05498	0.135083
Smarcad1	ENSRNOG00000006391	2.31863	-2.89577	0.403046
Xrcc6	ENSRNOG00000006392	4.06065	3.62719	0.147044
Sirt6	ENSRNOG00000006393	2.71494	3.68117	0.0971864
Tbc1d10a	ENSRNOG00000006394	1.06485	2.50349	0.206646
Synj2bp	ENSRNOG00000006399	6.67971	1.52083	0.364688
Tbc1d14	ENSRNOG00000006400	5.1017	-5.15617	0.0362138
Pvrl1	ENSRNOG00000006403	8.22586	0.496634	0.733982
Zhx1	ENSRNOG00000006412	3.66504	0.89961	0.707282
Aven	ENSRNOG00000006419	1.32846	-0.932338	0.709367
Syt1	ENSRNOG00000006426	9.20683	3.49055	0.0192217
LOC100911093	ENSRNOG00000006432	2.91188	2.93862	0.225988
Tor1b	ENSRNOG00000006435	3.54789	0.790111	0.764334
Ift27	ENSRNOG00000006440	0.0881225	-1.93213	0.284338
Fkbp4	ENSRNOG00000006444	4.19874	0.93478	0.707376
Erbb2	ENSRNOG00000006450	0.281135	0.849913	0.672393
Amdhd2	ENSRNOG00000006460	0.805476	1.59108	0.398493
Ero1l	ENSRNOG00000006462	4.646	3.70653	0.0851892
Eif2b2	ENSRNOG00000006467	5.19767	5.47179	0.0175333
Camk1g	ENSRNOG00000006470	2.11447	1.81477	0.465375
Pvalb	ENSRNOG00000006471	3.2381	-0.526849	0.826353
Hspa2	ENSRNOG00000006472	1.16498	1.26028	0.539778
Heatr5a	ENSRNOG00000006483	1.67033	-2.14038	0.377729
Topors	ENSRNOG00000006485	3.33026	1.26455	0.587579
Casp8ap2	ENSRNOG00000006487	-0.0445062	1.99709	0.231901
Neo1	ENSRNOG00000006490	0.335337	2.75347	0.151037
Cops5	ENSRNOG00000006499	2.64733	5.6209	0.0102104
Snf8	ENSRNOG00000006500	4.01476	2.2256	0.379227
Loh12cr1	ENSRNOG00000006505	1.05357	2.68399	0.196552
Srgap3	ENSRNOG00000006509	5.61195	-6.20746	0.164455
Vezt	ENSRNOG00000006514	4.05821	3.06505	0.19074
Tmem107	ENSRNOG00000006519	2.14394	-5.27852	0.056757
Atl2	ENSRNOG00000006523	4.96832	1.47269	0.485435
Sema3c	ENSRNOG00000006526	-0.31939	-0.134689	0.926851
Slc6a1	ENSRNOG00000006527	8.38746	-1.11118	0.589899
H3f3b	ENSRNOG00000006532	7.02831	-2.97565	0.0942139
Crbn	ENSRNOG00000006534	0.926833	1.38428	0.479863
Pex16	ENSRNOG00000006539	-0.0961189	1.87143	0.265002
Atp6v0c	ENSRNOG00000006542	8.78134	0.604458	0.649614
2018-09-07	ENSRNOG00000006545	7.30198	0.260284	0.864086
Mrc2	ENSRNOG00000006548	1.47345	-6.38529	0.0202392
Dcaf15	ENSRNOG00000006551	1.1862	2.74523	0.170492
Fam149b1	ENSRNOG00000006554	0.657333	0.824641	0.664017
Cyfip2	ENSRNOG00000006557	11.8562	-0.466931	0.627341
Akap8	ENSRNOG00000006559	4.29725	0.134598	0.9573
Fstl4	ENSRNOG00000006565	1.71053	-0.249535	0.923113
Plekhg3	ENSRNOG00000006570	1.98773	-2.22819	0.31545
Bms1	ENSRNOG00000006576	4.41962	-0.933399	0.707141
Aptx	ENSRNOG00000006582	-0.135149	1.83675	0.258578
Hpgds	ENSRNOG00000006583	1.39732	-4.69447	0.101442
LOC100910833	ENSRNOG00000006587	4.50707	2.93968	0.222865
Mif	ENSRNOG00000006589	2.48633	-0.0973614	0.964291
Fam163b	ENSRNOG00000006591	1.53507	5.17994	0.0111317
Grpel1	ENSRNOG00000006593	4.57677	-3.0455	0.249758
Htr3a	ENSRNOG00000006595	0.473091	-0.353359	0.868694
Unk	ENSRNOG00000006600	2.29345	-6.49908	0.00321663
Thy1	ENSRNOG00000006604	7.48208	2.64389	0.124225
Tmem70	ENSRNOG00000006608	4.43511	0.85707	0.714572
Mtap	ENSRNOG00000006615	1.66477	1.34199	0.572052
LOC100364190	ENSRNOG00000006617	2.16904	4.33852	0.0349021
Dnajc9	ENSRNOG00000006619	2.75689	0.898915	0.740114
Cry1	ENSRNOG00000006622	1.41033	-1.4026	0.505277
Cd302	ENSRNOG00000006623	2.48906	-2.14635	0.482748
Rps6ka3	ENSRNOG00000006632	3.09365	-0.718979	0.754863
Yipf6	ENSRNOG00000006642	1.87536	-1.04627	0.662695
Kdm4c	ENSRNOG00000006644	1.98132	-0.588296	0.788543
Ryr3	ENSRNOG00000006645	1.07578	2.72993	0.167474
Vopp1	ENSRNOG00000006646	6.03733	2.58823	0.260525
Thrb	ENSRNOG00000006649	5.99137	2.4363	0.325998
Ddx1	ENSRNOG00000006652	3.77797	1.35174	0.53692
Plrg1	ENSRNOG00000006655	1.91655	-2.69575	0.365907
RGD1563015	ENSRNOG00000006658	1.89897	1.55655	0.463876
Usp2	ENSRNOG00000006663	3.13686	1.85161	0.421745
Rai2	ENSRNOG00000006670	1.23781	0.160025	0.950601
Rdh10	ENSRNOG00000006681	0.657333	-0.946405	0.584559
Chd7	ENSRNOG00000006689	0.869332	-3.76202	0.0564525
Rbck1	ENSRNOG00000006695	3.7261	1.55162	0.46927
Tmem55a	ENSRNOG00000006697	6.27075	-1.40125	0.445097
Rab33a	ENSRNOG00000006698	2.59304	1.68847	0.536474
Mlh3	ENSRNOG00000006699	1.5856	0.782122	0.734472
Wdyhv1	ENSRNOG00000006700	3.00055	2.23532	0.37433
Zfp398	ENSRNOG00000006703	1.32774	4.74997	0.0162601
Mkks	ENSRNOG00000006705	2.94891	1.92741	0.385511
Ankrd26	ENSRNOG00000006717	1.46109	3.30063	0.111442
Rnpep	ENSRNOG00000006720	4.5088	2.73157	0.234946
Zfp9	ENSRNOG00000006726	0.23987	0.892795	0.617871
Dtd2	ENSRNOG00000006727	1.75541	1.51703	0.513351
Srgap2	ENSRNOG00000006733	1.68798	-6.95463	0.00142413
Acyp1	ENSRNOG00000006744	1.0926	4.27813	0.0281388
Cc2d1a	ENSRNOG00000006747	1.26557	1.08182	0.621696
Tmtc3	ENSRNOG00000006749	0.351734	1.06783	0.55385
Psmd6	ENSRNOG00000006751	4.25259	-0.390229	0.857231
Maged1	ENSRNOG00000006756	8.12818	0.086075	0.948288
Ankrd24	ENSRNOG00000006759	0.0881225	-1.93213	0.284338
Sh3gl2	ENSRNOG00000006761	1.53346	1.7595	0.515754
Nhp2l1	ENSRNOG00000006762	0.880604	3.85527	0.0459324
Rbm18	ENSRNOG00000006763	6.8718	-2.00516	0.272108
Laptm4b	ENSRNOG00000006766	6.23454	-2.07185	0.291205
Brd4	ENSRNOG00000006770	3.70108	2.92084	0.191699
Smyd1	ENSRNOG00000006776	0.139735	-0.247132	0.880853
Crot	ENSRNOG00000006779	2.73947	-2.00836	0.463614
Neb	ENSRNOG00000006783	0.824697	2.00369	0.396234
Sema4f	ENSRNOG00000006784	2.22403	1.08683	0.660304
Dcaf8	ENSRNOG00000006785	1.9291	5.94347	0.00322145
Dhcr24	ENSRNOG00000006787	7.07477	0.484963	0.796388
Ddit3	ENSRNOG00000006789	2.25627	3.67736	0.137148
Cep57	ENSRNOG00000006792	1.75047	1.23502	0.596163
Apmap	ENSRNOG00000006795	2.9431	3.62119	0.135315
Tmem246	ENSRNOG00000006800	5.26678	0.713456	0.745026
Lrrn1	ENSRNOG00000006802	5.76625	-4.46578	0.0357861
Dnajc10	ENSRNOG00000006803	6.7265	-0.0220649	0.989676
Sumf1	ENSRNOG00000006813	1.90894	-1.11354	0.678627
Ubr5	ENSRNOG00000006816	3.5875	0.958167	0.672772
Arl6ip5	ENSRNOG00000006818	4.86038	3.98388	0.135843
Hdac11	ENSRNOG00000006824	1.08985	4.27781	0.0290994
Tmem198b	ENSRNOG00000006827	-0.624988	-2.37709	0.0746856
Pgr	ENSRNOG00000006831	0.410751	2.90559	0.13734
Zdhhc5	ENSRNOG00000006832	4.56654	-0.300846	0.883998
Rb1cc1	ENSRNOG00000006833	5.87993	1.72023	0.356996
Arl5a	ENSRNOG00000006839	0.63611	-1.64844	0.409594
Ano4	ENSRNOG00000006841	1.31019	0.859713	0.69827
Dnajc14	ENSRNOG00000006844	7.37007	-0.150898	0.929308
Ovol2	ENSRNOG00000006850	2.14204	1.7385	0.483816
Elavl2	ENSRNOG00000006853	3.82967	0.703606	0.740058
Pyurfl1	ENSRNOG00000006858	0.702476	1.96225	0.371
Insig1	ENSRNOG00000006859	7.97965	2.34027	0.186109
Scaper	ENSRNOG00000006864	1.94704	2.81376	0.211523
Laptm4a	ENSRNOG00000006865	5.45767	-3.56989	0.104449
Etv1	ENSRNOG00000006867	5.43556	2.94172	0.159691
Ube2z	ENSRNOG00000006868	5.01473	1.8036	0.377638
Mtdh	ENSRNOG00000006870	2.13923	4.85813	0.0136854
Slc25a14	ENSRNOG00000006871	3.36055	3.63384	0.0959917
Efnb1	ENSRNOG00000006877	3.12838	3.94006	0.11792
Ppm1k	ENSRNOG00000006893	4.00658	-1.0522	0.661818
Tor1a	ENSRNOG00000006894	5.87095	0.085068	0.973284
Vps53	ENSRNOG00000006895	5.22665	0.146312	0.941059
Cd320	ENSRNOG00000006901	3.25537	2.68533	0.30314
Hectd1	ENSRNOG00000006905	3.02619	5.56885	0.00843868
Pou3f2	ENSRNOG00000006908	0.63611	-3.30857	0.0833075
Rpain	ENSRNOG00000006913	2.14892	4.87008	0.0137398
Sardh	ENSRNOG00000006916	0.382449	-2.982	0.167798
Zfp786	ENSRNOG00000006925	2.29212	-0.378479	0.867272
Hnrnpll	ENSRNOG00000006929	0.0768506	0.492355	0.764075
Eepd1	ENSRNOG00000006931	2.19412	1.4918	0.541935
Acvr1b	ENSRNOG00000006934	4.17142	5.91741	0.0145568
Ndufa7	ENSRNOG00000006939	4.97456	-4.71941	0.14613
Thumpd3	ENSRNOG00000006941	2.2076	6.54945	0.00217467
Pdhx	ENSRNOG00000006947	2.37035	6.82476	0.000795168
C1qbp	ENSRNOG00000006949	6.62147	3.49739	0.120013
Prex1	ENSRNOG00000006952	1.16103	0.440149	0.86109
Adamtsl1	ENSRNOG00000006956	1.08985	2.16653	0.257554
Gria4	ENSRNOG00000006957	3.88022	4.65766	0.0333431
Zfp12	ENSRNOG00000006958	1.50623	-1.11352	0.702627
Snrpb	ENSRNOG00000006961	4.51779	-1.07729	0.607343
Stk32c	ENSRNOG00000006962	2.8378	1.10434	0.686041
Aff4	ENSRNOG00000006965	3.00172	-0.631175	0.787628
Nfia	ENSRNOG00000006966	5.34678	-2.99414	0.145604
RGD1307947	ENSRNOG00000006973	11.6115	0.181267	0.873223
Wasl	ENSRNOG00000006975	7.45838	2.2364	0.221325
Med6	ENSRNOG00000006976	0.74619	-0.610627	0.793521
Hpca	ENSRNOG00000006979	2.68836	-0.325465	0.913182
Nr2c1	ENSRNOG00000006983	5.21896	-2.88369	0.266569
Mapk11	ENSRNOG00000006984	1.45134	5.00129	0.0122199
RGD1304624	ENSRNOG00000006986	0.318159	2.74458	0.156876
Tmem263	ENSRNOG00000006987	3.46745	3.0564	0.223821
Vamp2	ENSRNOG00000006989	7.71269	2.31812	0.153659
Rpl7	ENSRNOG00000006992	7.31432	-0.144335	0.926081
Ano6	ENSRNOG00000006995	0.167493	0.675217	0.694314
App	ENSRNOG00000006997	9.37418	0.885113	0.440609
Wdr78	ENSRNOG00000006999	1.34243	2.67067	0.296037
Slc3a1	ENSRNOG00000007006	1.42859	3.23566	0.120787
Cnksr2	ENSRNOG00000007014	5.01874	1.96263	0.325868
Mapkbp1	ENSRNOG00000007018	2.09819	6.26828	0.00225747
Galm	ENSRNOG00000007023	2.98255	-0.500338	0.820502
Hgf	ENSRNOG00000007027	3.1178	3.56942	0.162144
Dnaja1	ENSRNOG00000007029	3.36812	4.00064	0.0908515
Trim9	ENSRNOG00000007031	5.9128	2.32235	0.38774
Amigo2	ENSRNOG00000007032	1.93471	0.971609	0.709644
Sorcs2	ENSRNOG00000007033	2.46441	7.03461	0.000574477
Hipk2	ENSRNOG00000007034	4.1797	-6.11611	0.020168
Tgfbr1	ENSRNOG00000007036	3.96965	-6.80827	0.0138922
Timm17a	ENSRNOG00000007040	3.27893	2.89162	0.24437
Abcg2	ENSRNOG00000007041	3.32275	-8.70332	9.38e-05
RGD1305089	ENSRNOG00000007043	7.43457	-3.34499	0.0757359
Cfap70	ENSRNOG00000007046	-0.135149	-1.4443	0.360072
Eps8	ENSRNOG00000007047	0.21732	-2.7542	0.17336
Rap1b	ENSRNOG00000007048	1.621	-2.45224	0.245277
Bcl11a	ENSRNOG00000007049	3.55315	7.68554	0.000150102
Rraga	ENSRNOG00000007051	2.4695	3.63962	0.098697
Med7	ENSRNOG00000007053	0.396878	1.14053	0.542093
Atp1b4	ENSRNOG00000007059	-0.624988	-0.70639	0.527432
Zfp746	ENSRNOG00000007064	1.03235	0.975055	0.645189
Adhfe1	ENSRNOG00000007069	-0.624988	0.853014	0.4932
Fem1b	ENSRNOG00000007077	0.484363	-0.17859	0.929735
Gpn2	ENSRNOG00000007083	2.57071	5.56702	0.0129801
Xpot	ENSRNOG00000007088	1.51334	1.0399	0.646819
Lgmn	ENSRNOG00000007089	5.82852	-3.52305	0.0842476
Cacna1c	ENSRNOG00000007090	3.78661	5.55533	0.0172742
Ly6e	ENSRNOG00000007091	8.62667	-2.09212	0.131947
Gtpbp10	ENSRNOG00000007098	-0.135149	1.83675	0.258578
[truncated: 7,742 more rows]

## Sheet: Regression-Analysis
Gene Name	Rat Ensembl	Log2(Pyr/Non-pyr)	Mouse Ensembl	Log2(Neuon/Non-Neuron)	Astrocytes	Neuron	Oligodendrocyte.Precursor.Cell	Newly.Formed.Oligodendrocyte	Myelinating.Oligodendrocytes	Microglia	Endothelial.Cells
Gad1	ENSRNOG00000000007	2.61769	ENSMUSG00000070880	4.60234	1.3	66.8	11.1	2.1	0.9	0.2	0.9
Cbln1	ENSRNOG00000000010	-2.39222	ENSMUSG00000031654	3.48875	0.1	5.8	1.8	0.5	0.3	0.3	0.1
Hebp1	ENSRNOG00000000024	3.42834	ENSMUSG00000042770	-2.84967	24.3	5.6	13.7	14.3	38.2	135.5	16.2
Tmcc2	ENSRNOG00000000033	1.66292	ENSMUSG00000042066	-0.26208	2.3	21	12	58.1	71.6	6.4	0.7
Klhdc8a	ENSRNOG00000000036	3.36556	ENSMUSG00000042115	3.54432	0.2	3.5	0.4	0.1	0.4	0.6	0.1
Xpr1	ENSRNOG00000000042	-0.829303	ENSMUSG00000026469	0.834082	23.6	22.7	23.5	14	1	3.2	11.1
Idua	ENSRNOG00000000043	-0.387665	ENSMUSG00000033540	-1.04551	5.1	1.3	2.9	1.2	0.7	5.4	0.8
Tmem175	ENSRNOG00000000044	3.32372	ENSMUSG00000013495	-0.0369942	13.3	7.7	10	7.2	4.4	9.5	3
Cd82	ENSRNOG00000000047	-0.74976	ENSMUSG00000027215	-6.027	6.40774	1.6	8	104.7	155.8	193.7	157.4
Gak	ENSRNOG00000000048	3.49966	ENSMUSG00000062234	-0.035877	13.2	13.9	14.4	13.2	10.4	19.7	14.6
Abhd8	ENSRNOG00000000054	2.14525	ENSMUSG00000007950	1.4186	17.3	45	26.9	6.8	13.6	24.6	11.8
Cplx1	ENSRNOG00000000060	1.04387	ENSMUSG00000033615	2.86867	1.6	74.5	23.4	6	14.7	14.6	0.9
Pcgf3	ENSRNOG00000000062	2.09618	ENSMUSG00000033623	0.887995	8.9	12.8	8.1	10.4	5.5	2.3	6.3
Atp5i	ENSRNOG00000000064	1.04357	ENSMUSG00000050856	0.123334	6.8	17.9	13.6	16.2	16.6	12.3	33.1
Fbxo28	ENSRNOG00000000066	2.89163	ENSMUSG00000047539	0.672255	7.5	13.2	8.8	9.2	7.2	3.7	13.3
Ppp2r5a	ENSRNOG00000000068	-4.95106	ENSMUSG00000026626	-1.0166	32.4	7.2	8	10.8	9.5	6	20.7
Mtf2	ENSRNOG00000000075	0.812954	ENSMUSG00000029267	1.07555	8.7	9.8	6.5	3.5	0.9	1.2	7.1
Hltf	ENSRNOG00000000082	-1.28437	ENSMUSG00000002428	-0.137504	3.3	3	6.2	3.9	1.1	1.9	3.4
Gpr89b	ENSRNOG00000000095	3.05317	ENSMUSG00000028096	-0.793997	8.1	6.2	14.4	14	10.1	8.5	9.4
Rnf115	ENSRNOG00000000098	2.77758	ENSMUSG00000028098	-0.141833	14.1	12.1	16.6	13.1	6.4	9.7	20.2
Thoc3	ENSRNOG00000000104	7.81218	ENSMUSG00000025872	0.295456	2.6	8.1	6.1	8.8	11.1	5.2	5.8
Cplx2	ENSRNOG00000000105	-2.41092	ENSMUSG00000025867	3.15724	7.8	62.3	11.8	3.4	9.9	7.1	1.9
Elac1	ENSRNOG00000000113	-0.925111	ENSMUSG00000036941	1.19068	2	3.5	2.5	1.3	0.5	1.4	1.5
Ak2	ENSRNOG00000000122	1.1894	ENSMUSG00000028792	-0.784941	24.9	13.9	24.6	18	15.3	33.3	27.6
Rnf19b	ENSRNOG00000000123	2.98654	ENSMUSG00000028793	-0.415037	8	21	18.7	8.3	3.1	120.4	9.5
Dnajb5	ENSRNOG00000000130	-2.24498	ENSMUSG00000036052	1.12996	13.2	26.7	17.3	6.7	4.1	11.1	20.8
Txndc15	ENSRNOG00000000133	-3.10835	ENSMUSG00000021497	0.227515	28.9	33.7	50.7	27.5	14.9	18.7	32
Dnajc1	ENSRNOG00000000150	-0.845981	ENSMUSG00000026740	-0.967263	6.2	2.6	5.9	4.7	1.6	3	9.1
Atg12	ENSRNOG00000000157	-4.53154	ENSMUSG00000032905	1.10407	22.8	36.4	19.9	13.1	7.6	8	30.2
Cdo1	ENSRNOG00000000158	0.124319	ENSMUSG00000033022	-1.68579	30.5	13.2	193.2	25.7	1.1	0.5	3.8
Chm	ENSRNOG00000000161	1.30572	ENSMUSG00000025531	0.222392	7	6.3	7.3	4.6	2	1	10.5
Lamp2	ENSRNOG00000000164	-1.38414	ENSMUSG00000016534	-2.00573	71.5	17.8	63.6	75.9	55.3	76.5	86.1
Alas2	ENSRNOG00000000167	-5.38396	ENSMUSG00000025270	-1.0974	0.4	10.5	82.3	1.2	11.3	6.2	33.4
Gatm	ENSRNOG00000000168	-2.63107	ENSMUSG00000027199	-3.4035	42	10.4	106.4	118.4	112	220.2	61.3
Slc30a4	ENSRNOG00000000170	2.31476	ENSMUSG00000005802	0.282216	8.6	10.6	10.2	11.4	4.5	1.8	15.8
Mier2	ENSRNOG00000000175	-1.91654	ENSMUSG00000042570	0.260123	10	9.9	9.8	7.7	6.3	14.8	1
Tst	ENSRNOG00000000186	-0.999389	ENSMUSG00000044986	-1.72489	73.3	4.8	7	2.1	9.1	2.5	1.2
Ep300	ENSRNOG00000000190	-0.625799	ENSMUSG00000055024	0.369366	9.2	7.6	9	7.1	1.5	3.2	5.3
Gsta5	ENSRNOG00000000201	-1.91724	ENSMUSG00000074183	3.20343e-16	0.1	0.1	0.1	0.1	0.1	0.1	0.1
Gsta5	ENSRNOG00000000201	-1.91724	ENSMUSG00000074179	3.20343e-16	0.1	0.1	0.1	0.1	0.1	0.1	0.1
Gsta5	ENSRNOG00000000201	-1.91724	ENSMUSG00000057933	3.20343e-16	0.1	0.1	0.1	0.1	0.1	0.1	0.1
Gsta5	ENSRNOG00000000201	-1.91724	ENSMUSG00000111709	3.20343e-16	0.1	0.1	0.1	0.1	0.1	0.1	0.1
Syncrip	ENSRNOG00000000204	-0.70639	ENSMUSG00000032423	0.537522	17.5	17.2	18.9	11.7	3.3	5.9	13.8
Ano10	ENSRNOG00000000219	3.0388	ENSMUSG00000037949	-1.22819	12.3	7.1	17.5	12.7	19.8	20.1	17.4
Lmf1	ENSRNOG00000000230	2.44242	ENSMUSG00000002279	-2.33628	13.6	5	22.7	41.2	35.3	25.8	12.9
Kctd17	ENSRNOG00000000231	3.05948	ENSMUSG00000033287	-0.271764	33.6	23.8	35.3	20.8	22.9	6.6	53.2
Grm6	ENSRNOG00000000233	2.16406	ENSMUSG00000000617	-0.222392	0.1	0.1	0.1	0.1	0.1	0.1	0.2
Zfp207	ENSRNOG00000000236	4.36635	ENSMUSG00000017421	-0.0489869	39.1	41.5	69	66.7	24.2	20.5	38.1
Coil	ENSRNOG00000000244	4.66436	ENSMUSG00000033983	0.858528	2.9	5.5	7.5	3.7	0.7	1.3	2.1
Slc16a6	ENSRNOG00000000245	2.82406	ENSMUSG00000041920	-2.29605	4.1	1.5	3.7	0.8	0.4	23.5	11.7
Amz2	ENSRNOG00000000246	0.839618	ENSMUSG00000020610	1.17542	7.3	23	16.5	11.6	9.9	6.8	9
Mfsd11	ENSRNOG00000000247	-2.38692	ENSMUSG00000020818	-0.779779	13.4	8.3	13.6	8.9	4	36.6	9
Srsf2	ENSRNOG00000000248	-2.63617	ENSMUSG00000034120	0.203589	112.2	104.6	97.3	85.3	26.1	144	80.1
Jmjd6	ENSRNOG00000000250	-2.0421	ENSMUSG00000056962	-0.805353	10.9	10.3	17.3	15.4	10.4	23.2	30.8
Smpd3	ENSRNOG00000000257	-1.72679	ENSMUSG00000031906	2.92057	2.4	10.6	3.7	0.6	0.8	0.7	0.2
Zfp821	ENSRNOG00000000262	2.6679	ENSMUSG00000031728	1.67112	8	27.6	15.7	10.2	4.9	5.6	7.6
Def8	ENSRNOG00000000264	6.77766	ENSMUSG00000001482	0.477249	9	12.9	17.7	10.9	7.9	4	6.1
Phyhipl	ENSRNOG00000000274	1.55607	ENSMUSG00000037747	-1.7691	125.6	20.2	24.7	140.4	119.9	1.3	1.2
Prodh	ENSRNOG00000000281	-5.37249	ENSMUSG00000003526	-2.16506	16.8	1.1	5	0.6	1.4	3.1	2.7
Sesn1	ENSRNOG00000000302	-1.3699	ENSMUSG00000038332	1.3727	12	34.7	13.6	4	2	14.5	34.3
Cep57l1	ENSRNOG00000000303	-4.52527	ENSMUSG00000019813	-0.314511	2.2	1.3	2.4	1.2	0.7	0.6	2.6
Cd164	ENSRNOG00000000304	-1.52192	ENSMUSG00000019818	-2.08217	57.6	15	68.3	27.2	12.3	148.9	66.8
Zbtb24	ENSRNOG00000000308	-1.71264	ENSMUSG00000019826	0.0360693	4.5	2.7	3.6	1.7	0.8	2.7	2.5
Fig4	ENSRNOG00000000312	-3.99134	ENSMUSG00000038417	-0.722466	4.8	4	10.1	10.1	4.9	3.8	5.9
Sec63	ENSRNOG00000000314	-2.23259	ENSMUSG00000019802	-0.217052	24.1	11.6	16.6	13.5	4.6	3.8	18.3
Sobp	ENSRNOG00000000316	6.40691	ENSMUSG00000038248	2.03973	2.4	13.5	6.1	3.7	1.4	0.6	5.5
Cd24	ENSRNOG00000000321	-1.69404	ENSMUSG00000047139	3.46873	13.7647	95.7	5.3	0.5	0.8	1.6	29.9
Atg5	ENSRNOG00000000322	-3.35868	ENSMUSG00000038160	-0.855943	7.3	5.7	10.2	8.7	5.7	11.1	18.9
Hace1	ENSRNOG00000000327	1.97074	ENSMUSG00000038822	0.290515	5.3	5.3	5.9	3.7	1.7	1.1	8.3
Grik2	ENSRNOG00000000368	5.93466	ENSMUSG00000056073	0.374603	5	8.6	14	16	4.5	0.1	0.2
Ctnna3	ENSRNOG00000000378	1.56951	ENSMUSG00000060843	-1.73697	0.1	0.1	0.1	0.5	1.1	0.1	0.1
Slc25a16	ENSRNOG00000000387	1.81382	ENSMUSG00000036875	-0.369234	1.1	0.4	1	0.1	0.1	0.2	0.6
Supv3l1	ENSRNOG00000000392	4.27781	ENSMUSG00000020079	-0.0130562	9.8	5.5	6	4.8	2.7	6.3	3.7
Srgn	ENSRNOG00000000394	-4.72405	ENSMUSG00000020077	-5.69542	1.5	1.2	5.1	0.4	0.8	66.4	298.9
Ddx50	ENSRNOG00000000396	2.6692	ENSMUSG00000020076	0.256843	13	9.3	8.2	4.8	1.2	2.7	16.8
Ccar1	ENSRNOG00000000397	-0.605679	ENSMUSG00000020074	0.180059	21.2	12.5	15.1	8.9	2.6	2.6	15.8
Zufsp	ENSRNOG00000000398	3.82071	ENSMUSG00000039531	-0.127756	6.4	2.7	3.4	2.3	0.4	1.1	4.1
Nus1	ENSRNOG00000000411	6.38595	ENSMUSG00000023068	0.426859	12.1	17.7	14.4	12.2	4.7	5.8	29.8
Slc35f1	ENSRNOG00000000412	-1.25187	ENSMUSG00000038602	0.687186	11.7	30.7	76.6	25.1	0.7	0.1	0.2
Asf1a	ENSRNOG00000000415	1.29882	ENSMUSG00000019857	-0.371969	9.1	5.1	9.1	6.9	3.6	1.2	9.7
Numa1	ENSRNOG00000000417	1.20265	ENSMUSG00000066306	-0.466466	18.6	9.3	18.7	9.4	4.2	16.6	9.6
Atf6b	ENSRNOG00000000431	-2.11334	ENSMUSG00000015461	-0.294061	20.4	23	32.4	33.8	20.6	43	19
Prrt1	ENSRNOG00000000433	0.72645	ENSMUSG00000015476	1.70178	0.6	13.5	7.3	6.4	8.6	1.8	0.2
Ppt2	ENSRNOG00000000435	-0.401567	ENSMUSG00000015474	-2.02509	15.1	5.7	23.3	20.9	10.8	34.2	34.9
Agpat1	ENSRNOG00000000437	0.567642	ENSMUSG00000034254	-0.126264	25.3	32.8	39.2	52.8	40.1	42.9	14.5
Rnf5	ENSRNOG00000000438	-0.715756	ENSMUSG00000015478	-0.27965	19.2	24.7	36.8	44.5	56.2	19.8	3.4
Ager	ENSRNOG00000000439	-4.87513	ENSMUSG00000015452	-0.678072	1.6	0.5	0.3	0.3	0.1	0.3	2.2
Pbx2	ENSRNOG00000000440	2.6685	ENSMUSG00000034673	-0.661924	9	7.3	8.6	6.6	6.2	24.4	14.5
Tap1	ENSRNOG00000000457	0.251543	ENSMUSG00000037321	-1.66297	2.6	1.3	3.5	1.2	0.2	9	8.2
Col11a2	ENSRNOG00000000463	0.737016	ENSMUSG00000024330	-2.41238	2.7	3.4	30.5	54.9	19.5	0.8	0.2
Rxrb	ENSRNOG00000000464	3.05142	ENSMUSG00000039656	-0.424609	7.8	16.9	22.8	15.3	15.4	52.8	22
Slc39a7	ENSRNOG00000000465	3.38739	ENSMUSG00000024327	-0.777725	49.4	34.2	55.7	61.2	38.3	99.5	47.7
Hsd17b8	ENSRNOG00000000466	4.2888	ENSMUSG00000073422	-0.934959	24.6	13.8	23.4	27.9	22.9	36.2	23.3
Ring1	ENSRNOG00000000467	6.51234	ENSMUSG00000024325	-0.385378	15.6	8.6	11.7	10.4	8.6	14.1	7
Vps52	ENSRNOG00000000470	0.0797514	ENSMUSG00000024319	-0.167563	19.7	24.9	31.1	32.5	32.2	28.9	23.4
Zbtb22	ENSRNOG00000000476	-0.64573	ENSMUSG00000051390	0.192645	6.8	12	8.7	7.4	7.3	18.4	14.4
Daxx	ENSRNOG00000000477	-3.74279	ENSMUSG00000002307	0.465381	5.3	8.1	7.5	5.2	3.2	7.8	6.2
Phf1	ENSRNOG00000000480	-6.4207	ENSMUSG00000024193	1.17304	7.8	17.4	5.7	3.5	2.2	19.3	7.8
Cuta	ENSRNOG00000000481	4.53724	ENSMUSG00000024194	-0.98749	24.9	22.2	39.4	46.5	46.6	65.4	41.3
Snrpc	ENSRNOG00000000493	1.74946	ENSMUSG00000024217	-0.206694	4.6	6.6	7.7	6.6	5.9	8.3	12.6
Anks1a	ENSRNOG00000000498	-1.78937	ENSMUSG00000024219	-0.683265	5.6	5.2	3.5	7.3	4.3	17.5	11.9
Zfp523	ENSRNOG00000000501	0.373217	ENSMUSG00000024220	0.201091	16.4	15.5	17.2	17.6	12.2	10.3	7.2
Def6	ENSRNOG00000000502	-3.95236	ENSMUSG00000002257	-3.8413	0.3	0.4	0.5	0.1	0.1	9.5	23.9
Ppard	ENSRNOG00000000503	-4.65694	ENSMUSG00000002250	-1.92892	5.4	3.9	7.9	8.9	6.9	25.2	34.8
Tead3	ENSRNOG00000000506	3.57997	ENSMUSG00000002249	1.69295	14.2	10.4	1.6	0.5	0.1	2.7	0.2
Srpk1	ENSRNOG00000000511	5.86059	ENSMUSG00000004865	0.314109	13.4	13.8	12.7	18.2	4.7	5.8	11.8
Mapk14	ENSRNOG00000000513	6.75695	ENSMUSG00000053436	-0.831775	11.4	10.6	20.4	11.5	5.7	46.7	17.5
Mapk13	ENSRNOG00000000515	-0.230126	ENSMUSG00000004864	-0.736966	0.2	0.1	0.1	0.1	0.1	0.4	0.1
Srsf3	ENSRNOG00000000520	1.91573	ENSMUSG00000071172	0.384067	36.8	42.5	46.4	37.2	11.8	23.5	39.7
Cpne5	ENSRNOG00000000522	3.30308	ENSMUSG00000024008	5.02554	0.1	7.6	0.4	0.1	0.4	0.3	0.1
Ppil1	ENSRNOG00000000523	-2.68131	ENSMUSG00000024007	0.358247	8.2	11.9	14.3	10.9	6.2	3.5	12.6
RGD735065	ENSRNOG00000000524	2.4805	ENSMUSG00000052712	-0.624169	9.1	12.1	19.9	20.6	22.3	22	18
Pi16	ENSRNOG00000000525	-0.40557	ENSMUSG00000024011	1.44746	0.1	0.5	0.1	0.1	0.1	0.3	0.4
Mtch1	ENSRNOG00000000527	1.94553	ENSMUSG00000024012	0.545489	53.8	141.5	89.8	112.1	126.4	91.1	108.5
Btbd9	ENSRNOG00000000540	1.57844	ENSMUSG00000062202	0.547968	4	7.7	6.6	7.1	3.1	7.9	2.9
Glo1	ENSRNOG00000000541	-0.430879	ENSMUSG00000024026	-0.594844	15	9.7	16.5	17.8	16.8	7	14.8
Nt5dc1	ENSRNOG00000000546	-3.40548	ENSMUSG00000039480	-1.78427	2.2	0.6	0.6	0.7	0.3	1.6	7
Tspyl4	ENSRNOG00000000547	2.18333	ENSMUSG00000039485	2.50954	4.4	91.3	35.3	25.4	28.2	1.9	1
Tspyl1	ENSRNOG00000000549	-1.91997	ENSMUSG00000047514	1.51129	19.1	54.4	29.4	15.2	11.6	20.1	19.1
Sar1a	ENSRNOG00000000557	1.05236	ENSMUSG00000020089	0.814739	13.7	25.3	25.7	14.7	7.5	5.8	18.9
Sgpl1	ENSRNOG00000000565	6.24993	ENSMUSG00000020097	-1.39635	31.8	17	54.2	26.3	7.1	142.4	6.7
Unc5b	ENSRNOG00000000567	-3.17437	ENSMUSG00000020099	0.0575773	0.7	21.3	0.6	31.3	54	0.4	35.8
Slc29a3	ENSRNOG00000000568	-2.65079	ENSMUSG00000020100	-3.27302	2.1	0.8	3.6	8.4	7.2	24.4	0.7
Psap	ENSRNOG00000000571	-1.55674	ENSMUSG00000004207	-0.446397	656	496.6	535.8	482.7	348	1796.5	241.1
Anapc16	ENSRNOG00000000576	1.42393	ENSMUSG00000020107	-0.781858	19.7	19.3	31.4	35.7	37.4	33.8	41.1
Marcks	ENSRNOG00000000579	-1.31174	ENSMUSG00000069662	0.387314	105.5	190.7	274.2	303.6	50.9	124.3	16.3
Cdc40	ENSRNOG00000000581	5.7057	ENSMUSG00000038446	-0.485427	10.7	4.5	7.8	8.1	1.5	2.6	7.1
Cdk19	ENSRNOG00000000583	-0.776305	ENSMUSG00000038481	-0.822973	7.6	7	7.2	21.9	15.5	9.6	12.5
Amd1	ENSRNOG00000000585	1.39759	ENSMUSG00000075232	-1.73697	0.1	0.1	0.1	1.5	0.1	0.1	0.1
Gtf3c6	ENSRNOG00000000586	0.880772	ENSMUSG00000019837	-0.0498889	7.7	9	14.9	11.4	9.6	3.4	8.9
Rpf2	ENSRNOG00000000587	1.48814	ENSMUSG00000038510	0.443607	3.3	3.4	3.7	3.2	1.6	0.8	2.4
Rev3l	ENSRNOG00000000593	2.54148	ENSMUSG00000019841	0.634351	12	10.4	18.8	4.8	0.4	0.2	4
Fyn	ENSRNOG00000000596	-2.61577	ENSMUSG00000019843	-1.3619	37	43.9	81.2	447.8	60.5	9.7	40.8
Lama4	ENSRNOG00000000599	-6.63371	ENSMUSG00000019846	-4.89077	6.6	0.7	3.7	1.5	0.2	0.2	112.4
Hdac2	ENSRNOG00000000604	1.60524	ENSMUSG00000019777	0.872527	27.7	43.3	38.3	30.6	10.7	5.8	28.8
Hs3st5	ENSRNOG00000000605	2.08035	ENSMUSG00000044499	5.81762	0.1	9.4	0.5	0.1	0.1	0.1	0.1
Ipmk	ENSRNOG00000000609	4.19401	ENSMUSG00000060733	-0.308508	5.8	7.2	6.8	8	3.3	7.5	22.1
Cisd1	ENSRNOG00000000610	4.53824	ENSMUSG00000037710	0.20633	23.1	45.9	37.3	66.9	79.4	10.8	21.2
Ube2d1	ENSRNOG00000000611	2.40831	ENSMUSG00000019927	0.655572	6.5	24.6	10.9	18.6	39.5	7.4	10.8
Tfam	ENSRNOG00000000613	3.41514	ENSMUSG00000003923	0.341037	5.3	5.7	6.5	4.3	3	2.5	5.4
Bicc1	ENSRNOG00000000614	-1.56914	ENSMUSG00000014329	-2.03953	1.8	0.3	2.2	1.5	1.2	0.1	0.6
Hint1-ps1	ENSRNOG00000000622	-0.0150076	ENSMUSG00000020267	0.361764	34.6	153.3	130.6	106.7	117.1	106	220.8
Rhobtb1	ENSRNOG00000000633	-4.73034	ENSMUSG00000019944	-1.46279	0.2	1.3	1.2	0.3	0.1	3.7	16
Zfp365	ENSRNOG00000000638	1.39105	ENSMUSG00000037855	-0.800776	0.9	15.7	28.1	87	43.5	4.2	0.4
Egr2	ENSRNOG00000000640	6.97489	ENSMUSG00000037868	-2.75918	4.1	2.9	6.2	0.9	0.8	103.3	2.5
LOC100363472	ENSRNOG00000000641	2.12741	ENSMUSG00000075000	0.364764	5.7	9.4	4.7	5.1	3.5	20.3	4.5
Reep3	ENSRNOG00000000645	-4.56627	ENSMUSG00000019873	-2.63654	31	5.8	28.3	58.7	52.4	14.6	31.4
Jmjd1c	ENSRNOG00000000648	2.02547	ENSMUSG00000037876	0.0501088	30.7	16.6	21.8	11.2	2.1	10.2	20.2
Hps4	ENSRNOG00000000661	1.80535	ENSMUSG00000042328	-1.78248	6.3	3.9	5.9	3.8	3.3	59.1	2.1
Srrd	ENSRNOG00000000662	-3.18388	ENSMUSG00000029346	-0.541146	7.7	7.8	7.9	6.1	5.9	34.5	6
Tfip11	ENSRNOG00000000663	0.454729	ENSMUSG00000029345	0.054743	7.1	9.4	7.9	8.6	7.1	14.8	8.8
Tpst2	ENSRNOG00000000664	0.233671	ENSMUSG00000029344	-2.06228	15	8.5	12.6	8.7	11.5	118.1	47.1
Pitpnb	ENSRNOG00000000665	1.82871	ENSMUSG00000050017	0.26157	14.2	19.7	20.2	17.3	11.5	10	25.4
Svop	ENSRNOG00000000693	1.36246	ENSMUSG00000042078	3.12908	0.3	29.6	12.8	1.7	2.5	2.7	0.3
Coro1c	ENSRNOG00000000697	-1.03683	ENSMUSG00000004530	0.29523	3.3	29	21.8	25.9	16.8	33.8	40.2
Tmem119	ENSRNOG00000000700	-8.36818	ENSMUSG00000054675	-9.57428	0.5	0.2	20.8	0.9	2.9	889.6	0.1
Iscu	ENSRNOG00000000701	2.54042	ENSMUSG00000025825	-0.356551	7.1	12.9	15.1	7.5	7.6	40	21.8
Sart3	ENSRNOG00000000702	4.31214	ENSMUSG00000018974	-0.0692145	11.1	7.8	9.6	7.8	5.3	10.8	4.5
Sgsm1	ENSRNOG00000000708	7.65119	ENSMUSG00000042216	3.53804	0.6	24.2	7.9	2	1.2	0.6	0.2
Cggbp1	ENSRNOG00000000718	-2.21048	ENSMUSG00000054604	-0.0430687	16	17.6	20.4	17.4	8.6	7.3	39.1
RT1-CE5	ENSRNOG00000000723	-7.19454	ENSMUSG00000054128	3.20343e-16	0.1	0.1	0.1	0.1	0.1	0.1	0.1
Tmlhe	ENSRNOG00000000729	-4.70509	ENSMUSG00000079834	3.20343e-16	0.1	0.1	0.1	0.1	0.1	0.1	0.1
RT1-M3-1	ENSRNOG00000000763	3.5537	ENSMUSG00000016206	-2.152	0.2	0.6	1.2	0.2	0.1	5.9	8.4
Gabbr1	ENSRNOG00000000774	-0.822433	ENSMUSG00000024462	0.964827	214.5	106.7	55.3	22	24.4	7.6	4.2
Mog	ENSRNOG00000000775	3.49445	ENSMUSG00000076439	-9.05509	0.1	0.7	2.4	509.8	1720.8	0.9	0.1
RT1-S3	ENSRNOG00000000777	-3.77147	ENSMUSG00000067212	-3.97728	1.3	0.8	3.4	0.4	0.5	53.6	16.4
Znrd1as1	ENSRNOG00000000778	-2.90624	ENSMUSG00000036214	-0.584963	1.3	0.4	0.6	0.4	0.6	0.2	0.5
Znrd1	ENSRNOG00000000779	0.690912	ENSMUSG00000036315	-0.52734	13.9	10.5	19.7	8.9	5.3	19.6	23.4
Ppp1r11	ENSRNOG00000000780	1.87687	ENSMUSG00000036398	-0.167206	4.3	11.8	12.1	11.7	15.3	14.7	21.4
Trim39	ENSRNOG00000000785	3.8343	ENSMUSG00000045409	0.623146	9.6	6.7	4.8	3.5	2.3	2.2	3.7
Ranbp2	ENSRNOG00000000796	-0.400987	ENSMUSG00000003226	0.558245	13.5	10.7	8.1	5.4	1.6	2.7	12.3
Gnl1	ENSRNOG00000000798	0.584844	ENSMUSG00000024429	0.550768	14.5	27.1	21.5	13	16.2	35.8	10
Abcf1	ENSRNOG00000000799	0.912635	ENSMUSG00000038762	0.0155969	11.6	15.5	14.6	14.7	12.7	19.8	18.6
Man1a1	ENSRNOG00000000800	3.03222	ENSMUSG00000003746	-1.68307	1.3	4.5	3.1	26.2	16.2	24	15.9
Mrps18b	ENSRNOG00000000804	1.37813	ENSMUSG00000024436	-0.329705	6.3	7.4	8.3	10	9.4	16.2	5.6
Gja1	ENSRNOG00000000805	-3.95701	ENSMUSG00000050953	-2.70162	500.7	15.7	37.6	0.9	5.7	3.9	64
Hsf2	ENSRNOG00000000808	2.49363	ENSMUSG00000019878	0.465499	15.6	13.9	20.7	13.2	3.3	2	5.6
Atat1	ENSRNOG00000000809	0.490158	ENSMUSG00000024426	0.52146	14.9	55	44.3	86.4	75.2	5.7	3.4
Fabp7	ENSRNOG00000000814	-3.9962	ENSMUSG00000019874	-1.05693	1604.1	156.1	262.9	53.9	7.6	5.4	14.7
Smpdl3a	ENSRNOG00000000815	-7.77783	ENSMUSG00000019872	-2.59711	96.8	6.9	16.6	4.7	5.5	8.2	118.7
Nrm	ENSRNOG00000000818	-1.57199	ENSMUSG00000059791	-2.80735	2.5	1.8	14.2	21.2	2.9	29	5.8
Dse	ENSRNOG00000000824	-5.92374	ENSMUSG00000039497	-0.0506261	0.7	1.4	3.3	0.8	0.2	3	0.7
Flot1	ENSRNOG00000000826	2.17288	ENSMUSG00000059714	0.898788	14.3	34.4	23.7	13.2	9.2	34.6	15.7
Ier3	ENSRNOG00000000827	-0.829303	ENSMUSG00000003541	-3.76183	14.9	8.7	10.9	1.9	0.7	517.8	161.9
Gtf2h4	ENSRNOG00000000831	-1.29487	ENSMUSG00000001524	-0.5025	4	2.6	5	2.9	2	4.5	3.7
Vars2	ENSRNOG00000000833	2.45459	ENSMUSG00000038838	0.467393	5	5.3	5.4	4.3	2.1	3.9	2.3
Atp6v1g2	ENSRNOG00000000840	1.33701	ENSMUSG00000024403	2.90974	3.5	50.6	13.8	6.2	9.3	5.9	1.7
Ddx39b	ENSRNOG00000000841	1.0927	ENSMUSG00000019432	0.144076	105.3	108.9	126	111.8	60.9	131	56.3
Csnk2b	ENSRNOG00000000847	-1.82088	ENSMUSG00000024387	-0.133492	28.6	50.2	53.8	54.9	45.9	62.8	84.4
Bag6	ENSRNOG00000000851	-1.03051	ENSMUSG00000024392	0.513429	29.3	60	50.2	50.2	30.8	57.9	33.8
Prrc2a	ENSRNOG00000000852	4.01229	ENSMUSG00000024393	0.424272	38.9	50.5	52.4	44.7	20.9	53.6	15.3
Aif1	ENSRNOG00000000853	-5.673	ENSMUSG00000024397	-3.06219	0.1	3.5	10.6	1.3	2.4	160.6	0.4
Zic3	ENSRNOG00000000861	-7.10391	ENSMUSG00000067860	-1.49033	1.1	2.1	0.2	0.1	0.1	0.1	33.8
Rbmx	ENSRNOG00000000866	2.11754	ENSMUSG00000031134	0.560647	41.4	35.3	50.2	24.2	2.9	3.5	21.4
Vars	ENSRNOG00000000867	3.90895	ENSMUSG00000007029	-0.0120584	15.7	13.9	19.4	15.9	5.6	20.5	7
Cd40lg	ENSRNOG00000000871	-0.401567	ENSMUSG00000031132	3.20343e-16	0.1	0.1	0.1	0.1	0.1	0.1	0.1
Fhl1	ENSRNOG00000000875	4.78583	ENSMUSG00000023092	1.69063	36.8	62.3	38.8	18.5	19.5	0.8	1.4
Slc9a6	ENSRNOG00000000879	4.98392	ENSMUSG00000060681	1.72045	11.7	35.7	18.2	18.7	9.9	2.7	3.8
Mmgt1	ENSRNOG00000000881	0.39557	ENSMUSG00000061273	-0.541475	15.9	11.6	25.3	29.3	18.1	3.1	9.6
Auts2	ENSRNOG00000000885	0.57013	ENSMUSG00000029673	2.21699	5	14.8	2.8	3.8	1.4	0.1	6
Caln1	ENSRNOG00000000886	2.5145	ENSMUSG00000060371	3.94486	0.1	7.7	1	0.3	0.5	0.6	0.5
Sbds	ENSRNOG00000000888	0.842745	ENSMUSG00000025337	-1.18903	13.7	12.5	21.7	39.6	41.9	17.8	36.3
Fry	ENSRNOG00000000894	-0.371294	ENSMUSG00000056602	0.236352	9.4	7.5	9.7	3.9	0.4	0.3	14.5
Rabgef1	ENSRNOG00000000895	4.94705	ENSMUSG00000025340	-0.417348	7.7	7.8	6.6	4.5	2.7	20.5	20.5
Tpst1	ENSRNOG00000000900	0.601282	ENSMUSG00000034118	-0.674839	11.4	12.1	17.7	26.6	30.1	3.9	26.2
Crcp	ENSRNOG00000000901	-3.71174	ENSMUSG00000025532	0.0955777	6.3	7.8	6.3	7.1	7	7.4	9.7
Hsph1	ENSRNOG00000000902	5.31092	ENSMUSG00000029657	-0.606123	20.7	18.8	61.2	45.4	17.3	13.3	13.8
Asl	ENSRNOG00000000903	2.79275	ENSMUSG00000025533	0.176086	5.2	13.2	8.4	4.6	3.9	31.7	16.3
Uspl1	ENSRNOG00000000909	5.21797	ENSMUSG00000041264	-0.415037	6.8	5.1	9.3	8.2	5.3	5.5	5.7
Ubl3	ENSRNOG00000000921	1.53187	ENSMUSG00000001687	-0.858208	29.2	51.1	54.9	217.3	111	71.5	71.9
Sumf2	ENSRNOG00000000922	3.4197	ENSMUSG00000025538	-1.30154	14.4	3.8	9	7.2	4	8.7	12.9
Slc7a1	ENSRNOG00000000924	-5.90886	ENSMUSG00000041313	-1.62285	6.1	11.9	5.7	6.1	0.8	8	193.2
Psph	ENSRNOG00000000925	-3.21234	ENSMUSG00000029446	-1.6977	27.9	5.4	21.3	20.5	21.6	6.4	7.4
Mrps17	ENSRNOG00000000926	-0.920508	ENSMUSG00000034211	-0.073358	13.6	13.1	18.4	16	12.3	9.7	12.7
Sfswap	ENSRNOG00000000931	4.45685	ENSMUSG00000029439	0.647657	26.3	19.4	14.5	12.1	4.1	8.5	8.8
Piwil1	ENSRNOG00000000934	0.481111	ENSMUSG00000029423	3.20343e-16	0.1	0.1	0.1	0.1	0.1	0.1	0.1
Stx2	ENSRNOG00000000936	0.468601	ENSMUSG00000029428	-1.39448	7.1	5.3	6.9	21.4	26.7	14.2	7.3
Slc46a3	ENSRNOG00000000937	3.50722	ENSMUSG00000029650	-4.40826	2.4	0.5	7.1	1.6	1.1	22.5	29
Ran	ENSRNOG00000000938	-0.151587	ENSMUSG00000029430	0.108404	21.1	37.3	45.1	39.6	20	34.5	47.3
Flt1	ENSRNOG00000000940	-4.85261	ENSMUSG00000029648	-6.14907	1.3	0.5	0.5	0.1	0.1	0.4	210.5
Lnx2	ENSRNOG00000000955	-0.866693	ENSMUSG00000016520	-2.36923	1	0.4	1.3	0.6	0.1	0.7	8.7
Rasl11a	ENSRNOG00000000956	1.57772	ENSMUSG00000029641	-1.1964	17.5	2	4.6	1	0.1	1.5	2.8
Glt1d1	ENSRNOG00000000961	-1.42328	ENSMUSG00000049971	1.82597	0.1	1.3	1.2	0.5	0.2	0.1	0.1
Slc15a4	ENSRNOG00000000962	3.51959	ENSMUSG00000029416	-2.62449	8.2	5.2	14.1	43.5	15.2	105.4	6
Aacs	ENSRNOG00000000967	3.82633	ENSMUSG00000029482	-0.747339	35.6	19.4	15.1	53.2	80.5	8.4	2.6
Rnf6	ENSRNOG00000000968	3.09676	ENSMUSG00000029634	0.866144	8.2	7.2	3.7	2.2	0.6	2.5	6.5
Zfp358	ENSRNOG00000000974	-1.64351	ENSMUSG00000047264	0.322714	4.7	15.3	14.9	11.5	12.2	10.7	19.4
Mcoln1	ENSRNOG00000000975	2.05937	ENSMUSG00000004567	0.0619368	16.8	23.4	17.3	26.9	25.4	20.8	27.3
Pnpla6	ENSRNOG00000000977	-0.742152	ENSMUSG00000004565	0.024453	14.8	11.9	7.7	9.2	9	3.2	26.3
Bri3bp	ENSRNOG00000000979	0.521038	ENSMUSG00000037905	0.915111	7.5	12.1	10.6	10.9	3.9	4.7	0.9
Scarb1	ENSRNOG00000000981	1.38428	ENSMUSG00000037936	-2.24542	37.2	9.1	23	15	7.1	29.1	147.5
Zfp394	ENSRNOG00000000983	-5.43631	ENSMUSG00000029627	0.0303736	1.5	1.6	1.4	1.2	1.2	1.9	2.2
Cpsf4	ENSRNOG00000000985	0.452154	ENSMUSG00000029625	0.59136	6.5	11.3	7.9	5.3	2.9	14.7	7.7
Ptcd1	ENSRNOG00000000987	1.97089	ENSMUSG00000029624	0.36995	4.1	5.6	5.5	3.7	2.4	5.8	4.5
Xab2	ENSRNOG00000000988	-2.53988	ENSMUSG00000019470	-0.445626	10.2	10.5	15.8	14.7	11.7	20.2	13.2
Bud31	ENSRNOG00000000989	0.500952	ENSMUSG00000038722	-0.944031	23.1	21.9	35.9	44.4	36.2	41.5	71.7
Pdap1	ENSRNOG00000000990	2.45674	ENSMUSG00000029623	0.48689	11	26.3	22.9	24.9	17.6	11.7	24.5
Arpc1b	ENSRNOG00000000991	-8.00307	ENSMUSG00000029622	-5.24031	3.3	1.5	8.8	73.4	80.6	98.8	75.3
Arpc1a	ENSRNOG00000000996	0.866539	ENSMUSG00000029621	-0.687849	18.7	48.1	52	159.4	160.5	36.2	38.1
Smurf1	ENSRNOG00000000999	-3.5695	ENSMUSG00000038780	-0.320041	9.5	15.3	5.8	35.5	26.9	22.8	14.1
Trappc5	ENSRNOG00000001003	-3.40501	ENSMUSG00000040236	0.455171	6.2	16.2	13.9	12.2	12.6	10	16
Ncor2	ENSRNOG00000001004	-3.4855	ENSMUSG00000029478	0.696459	15.7	27.9	12.2	38.1	14.8	17.5	5
Nptx2	ENSRNOG00000001006	2.34657	ENSMUSG00000059991	0.0703893	17.3	11.2	38.3	6.5	0.9	0.8	0.2
Bri3	ENSRNOG00000001009	4.25842	ENSMUSG00000047843	-0.567685	7.5	22.4	16.3	16.2	11.8	117.7	29.7
Tecpr1	ENSRNOG00000001010	-2.92108	ENSMUSG00000066621	0.0225426	9.1	12.9	10.6	10.5	9.8	10.8	25.4
Tsc22d1	ENSRNOG00000001030	0.808616	ENSMUSG00000022010	-0.437638	160.6	190.8	184.1	86.9	30.4	19.7	1068.8
Ccz1b	ENSRNOG00000001032	1.46166	ENSMUSG00000029617	-0.306889	12.5	13.5	16.4	18.5	13.4	9.2	30.2
Nufip1	ENSRNOG00000001033	1.24539	ENSMUSG00000022009	-0.0246621	3	2.9	3.5	3	1.4	2.5	4.3
Evi5l	ENSRNOG00000001034	1.35001	ENSMUSG00000011832	-0.191951	10.4	26	65.2	52.6	41.3	4.2	4.5
Gtf2h3	ENSRNOG00000001035	5.374	ENSMUSG00000029387	-0.908284	5.1	2.3	6.8	5.6	3.1	1.5	3.8
Eif2b1	ENSRNOG00000001039	-1.61058	ENSMUSG00000029388	-0.192645	5.6	7.7	9.5	12.6	10.5	4.9	9.7
Pms2	ENSRNOG00000001040	0.874029	ENSMUSG00000079109	0.561116	2.5	3	3	1.8	0.8	0.9	3.2
Ddx55	ENSRNOG00000001043	1.87444	ENSMUSG00000029389	0.584963	5.8	4.4	3.7	3.6	1.2	1.5	1.8
Aimp2	ENSRNOG00000001044	2.3565	ENSMUSG00000029610	0.41877	11.2	17.2	18.1	13.4	10	9.7	14.8
Tpt1	ENSRNOG00000001049	-0.72953	ENSMUSG00000060126	-1.5674	14.6	20.2	26.5	26.2	43.6	104.4	143.9
Eif2ak1	ENSRNOG00000001050	-2.32173	ENSMUSG00000029613	-0.177396	10.6	10.7	15.4	14.8	14.1	11.1	6.6
Slc25a30	ENSRNOG00000001052	3.27918	ENSMUSG00000022003	-0.27486	2	2.7	3.8	2.7	1.5	3.2	6.4
Tmed2	ENSRNOG00000001053	1.11485	ENSMUSG00000029390	-0.714741	41.5	31.4	51.3	72.4	44	41.6	58.4
Rilpl1	ENSRNOG00000001055	-0.129803	ENSMUSG00000029392	-2.07468	4.6	4	6.8	6.3	7.9	60.1	15.4
Snapc2	ENSRNOG00000001056	-5.60733	ENSMUSG00000011837	0.530693	9	15	19.4	6.9	5.7	7.1	14.2
Ctxn1	ENSRNOG00000001057	1.10216	ENSMUSG00000048644	1.74696	15.1	119.1	112	23.3	35.4	21	6.1
Timm44	ENSRNOG00000001058	0.437069	ENSMUSG00000002949	0.325627	26.3	17.9	14.7	11.4	6.6	11.8	14.9
Usp42	ENSRNOG00000001059	4.78724	ENSMUSG00000051306	0.739472	7.6	6.4	4.9	4.1	1.1	2	3.3
Snrnp35	ENSRNOG00000001060	-1.79057	ENSMUSG00000029402	-0.392317	2.5	3.2	3.7	3.1	4.4	9.1	2.4
Rilpl2	ENSRNOG00000001061	-1.34985	ENSMUSG00000029401	-1.85357	9	9.8	15.9	7.9	4.7	166.6	8.4
Sbno1	ENSRNOG00000001064	1.69228	ENSMUSG00000038095	0.207993	13.6	7.2	7	5.9	1.7	3.5	5.7
Cyth3	ENSRNOG00000001065	2.753	ENSMUSG00000018001	0.745635	6.3	10.2	4.9	1.7	1.6	5.4	16.6
Rac1	ENSRNOG00000001068	5.13957	ENSMUSG00000001847	-0.756625	84	103.5	167.7	296.4	200.1	138.3	162.7
Elavl1	ENSRNOG00000001069	1.95561	ENSMUSG00000040028	0.0458037	10.2	11.2	18	11.9	4.7	10	10.3
Cdk2ap1	ENSRNOG00000001070	0.930091	ENSMUSG00000029394	-1.09973	50.1	33.3	99.4	90.1	55.6	81	52
RGD1563482	ENSRNOG00000001073	0.032378	ENSMUSG00000047635	-0.369234	2.1	2	4.4	2.1	1.5	2.6	2.8
Daglb	ENSRNOG00000001079	0.399378	ENSMUSG00000039206	-3.01095	6.5	4.1	11.6	6	7.5	165	1.7
Arl6ip4	ENSRNOG00000001080	4.31226	ENSMUSG00000029404	0.201634	8.6	13.8	12.3	9.9	10	15.1	16.1
Ogfod2	ENSRNOG00000001081	-2.84931	ENSMUSG00000023707	3.20343e-16	7.6	8.5	6	12.1	12.1	6.9	6.3
Abcb9	ENSRNOG00000001082	-1.2258	ENSMUSG00000029408	0.103311	14.4	4.1	1.7	1.3	2.3	2.4	0.8
Kdelr2	ENSRNOG00000001083	1.83326	ENSMUSG00000079111	-0.964397	34.3	14.7	41.3	24.7	8.2	30.1	33.5
Vps37b	ENSRNOG00000001086	2.0194	ENSMUSG00000066278	-1.22367	49.6	24.2	25.2	55	18.4	171.6	19.3
Stard13	ENSRNOG00000001090	-4.27669	ENSMUSG00000016128	-3.59637	3.6	0.7	6.8	10.2	2.5	0.1	27.6
Hip1r	ENSRNOG00000001091	3.78625	ENSMUSG00000000915	0.0625996	7.7	31.4	56.3	60.9	43.6	2.4	9.5
Pds5b	ENSRNOG00000001098	0.914245	ENSMUSG00000034021	0.484436	10.7	9.7	12.1	5.9	1.7	1.3	9.9
Rbak	ENSRNOG00000001099	-0.445844	ENSMUSG00000061898	0.819428	4.7	3.5	2.8	1.7	0.6	0.4	1.7
Rnf216	ENSRNOG00000001101	1.11133	ENSMUSG00000045078	-0.121991	9.6	8.5	15	6.8	3.5	9	11.6
Denr	ENSRNOG00000001106	4.4848	ENSMUSG00000023106	0.562869	7.7	16.2	14	10.6	6.1	12.4	15
N4bp2l2	ENSRNOG00000001108	3.08519	ENSMUSG00000029655	-0.0310269	8.2	4.6	6.2	3.4	1.2	2.5	6.7
Brca2	ENSRNOG00000001111	-2.67203	ENSMUSG00000041147	-0.0931094	1.2	0.5	1	0.2	0.1	0.1	0.6
Mmd2	ENSRNOG00000001113	-3.03772	ENSMUSG00000039533	-2.26005	258	21.2	139.7	119	83	7.3	2.3
Wipi2	ENSRNOG00000001114	5.47627	ENSMUSG00000029578	0.445647	14.4	21.7	17.9	22.2	20.5	7.7	12.9
Slc29a4	ENSRNOG00000001115	-2.53633	ENSMUSG00000050822	1.78351	0.8	17.5	14	2	0.6	0.8	12.3
Med13l	ENSRNOG00000001120	4.80936	ENSMUSG00000018076	0.760173	6.1	9.4	9.3	6.3	1.2	6.2	4.2
Rnft2	ENSRNOG00000001124	5.12854	ENSMUSG00000032850	0.95335	11.7	14.2	14.3	11.8	5	0.8	0.4
Fbxw8	ENSRNOG00000001126	3.79904	ENSMUSG00000032867	-0.59655	9.9	12.4	15.7	26.3	21.2	21.6	17.8
Tesc	ENSRNOG00000001128	2.11936	ENSMUSG00000029359	0.429684	0.1	1.1	1	0.2	1.4	2.1	0.1
Rfc5	ENSRNOG00000001134	-2.90325	ENSMUSG00000029363	-0.306661	1.5	1.9	5	1.4	0.9	1.8	3.5
Wsb2	ENSRNOG00000001135	-4.60974	ENSMUSG00000029364	0.59561	9.8	51	30.7	32.9	33	60.6	35.5
Pebp1	ENSRNOG00000001136	1.98477	ENSMUSG00000032959	0.688048	62.3	166.4	143.7	129.4	88.9	119.4	76
Taok3	ENSRNOG00000001138	5.14804	ENSMUSG00000061288	0.820341	4.6	9.3	8.6	6.9	4.4	4.8	2.3
Suds3	ENSRNOG00000001139	3.55967	ENSMUSG00000066900	-0.21544	14.7	20.8	30.6	17.5	17.2	28.9	36
Cit	ENSRNOG00000001143	2.01363	ENSMUSG00000029516	2.16993	2.1	5.7	3.3	0.6	0.3	0.4	0.9
Pxn	ENSRNOG00000001149	-2.00008	ENSMUSG00000029528	-1.99855	10	8.3	13.4	28.1	7.3	104	36.2
Msi1	ENSRNOG00000001156	4.40654	ENSMUSG00000054256	1.27812	24.8	17.3	12.9	3.6	0.9	0.5	0.1
Abcg1	ENSRNOG00000001158	0.253349	ENSMUSG00000024030	-0.751741	0.2	6.8	19	8	9.8	18.9	12.8
Gatc	ENSRNOG00000001161	-0.0414175	ENSMUSG00000029536	1.0037	6.7	13	12	7.5	3.7	5.1	3.9
Srsf9	ENSRNOG00000001163	0.477761	ENSMUSG00000029538	-0.926471	17	16.1	28.7	23.9	15.1	72.8	26.1
Slc37a1	ENSRNOG00000001169	-2.13873	ENSMUSG00000024036	1.58496	0.2	1	0.4	0.5	0.1	0.6	0.2
Cox6a1	ENSRNOG00000001170	-0.841238	ENSMUSG00000041697	-0.599363	83.7	160.6	197.5	270.6	434.3	189.2	284.6
Rnf10	ENSRNOG00000001172	1.0066	ENSMUSG00000041740	0.163992	26.8	54.6	60.5	52.7	46.1	50	56.3
Cabp1	ENSRNOG00000001173	2.38408	ENSMUSG00000029544	0.672425	0.4	5.1	4.8	1.2	3.6	7.4	1.8
Pde9a	ENSRNOG00000001174	1.21065	ENSMUSG00000041119	-1.01707	37.9	4.9	5.1	12.3	1.6	0.5	2.1
Sppl3	ENSRNOG00000001178	-1.46999	ENSMUSG00000029550	0.473719	16.5	31.5	43.3	28.7	9.3	25.6	12.7
Ndufv3	ENSRNOG00000001182	-0.246408	ENSMUSG00000024038	0.130231	23.1	58.7	44.4	69.6	74.3	51.3	59.1
Pknox1	ENSRNOG00000001184	5.63532	ENSMUSG00000006705	-0.0866544	2.8	3.5	3.8	3	2.4	6.9	3.4
RGD1311899	ENSRNOG00000001185	0.950999	ENSMUSG00000029559	1.49537	7.7	35.9	21.1	13.5	15.1	7.3	11.7
Oasl	ENSRNOG00000001187	-0.227594	ENSMUSG00000041827	-1.60171e-16	0.1	0.2	0.1	0.1	0.1	0.7	0.1
Sik1	ENSRNOG00000001189	-1.29536	ENSMUSG00000024042	1.43639	42.1	59	3.6	2.4	1.3	15.4	66
Git2	ENSRNOG00000001190	-0.0630152	ENSMUSG00000041890	-1.04867	6	5.1	6.8	6	2.7	21	20.8
Gltp	ENSRNOG00000001192	0.666226	ENSMUSG00000011884	-5.11548	7.5	4.5	97.1	386.3	380.3	48.5	16.3
Rrp1b	ENSRNOG00000001194	0.891629	ENSMUSG00000058392	0.388565	3.3	3.6	2.8	2.1	0.8	4.7	2.8
Cstb	ENSRNOG00000001201	6.28183	ENSMUSG00000005054	-1.85347	13.3	17.3	32.6	27.3	42.1	153.9	105.9
Rrp1	ENSRNOG00000001203	-4.14102	ENSMUSG00000061032	0.572362	43	68.4	57.5	43.6	31	55.2	45.7
Ankrd13a	ENSRNOG00000001204	-3.92592	ENSMUSG00000041870	-1.04459	8.8	14.6	21.2	37.2	42.2	40.5	30.8
Agpat3	ENSRNOG00000001205	1.42346	ENSMUSG00000001211	-1.07266	100.7	31.3	75.6	61.8	67.6	60.7	28.6
Pwp2	ENSRNOG00000001210	3.2245	ENSMUSG00000032834	0.202913	3.7	4.7	5.2	3.9	1.9	7.2	2.6
RGD1303003	ENSRNOG00000001211	1.08443	ENSMUSG00000053329	-0.49173	17.4	17.4	22.1	31.3	28.5	26.9	20.6
Pfkl	ENSRNOG00000001214	0.817739	ENSMUSG00000020277	-0.0496308	12.9	20	18.1	15	9.2	37.5	31.5
RGD1309594	ENSRNOG00000001215	3.7193	ENSMUSG00000020284	0.737887	5.7	8.7	5	2.6	2.3	9.9	5.8
Ube2g2	ENSRNOG00000001222	-0.532888	ENSMUSG00000009293	-0.508429	11.2	20	19.1	17.4	11.1	83.8	28.1
Pttg1ip	ENSRNOG00000001223	-8.46472	ENSMUSG00000009291	-1.7927	62.7	24.5	75.2	38.1	25.2	118.4	189.7
Itgb2	ENSRNOG00000001224	-1.26479	ENSMUSG00000000290	-6.12928	0.1	0.4	5.8	0.4	0.9	160	0.8
Adarb1	ENSRNOG00000001227	1.6233	ENSMUSG00000020262	2.39402	0.7	10.6	4.5	1.5	1.6	2.5	1.3
Slc19a1	ENSRNOG00000001232	-0.913943	ENSMUSG00000001436	0.756331	8.6	12.5	9.2	4	1.6	11.3	9.7
Gna12	ENSRNOG00000001235	-4.22338	ENSMUSG00000000149	-2.04469	35.3	19.6	42.8	95.7	184.1	104.4	22.9
Cabin1	ENSRNOG00000001237	3.29937	ENSMUSG00000020196	0.277908	11	7.8	7.3	6.1	2.9	7.5	3.8
Rsrc2	ENSRNOG00000001238	-0.491659	ENSMUSG00000029422	0.22099	40.3	25.7	26.5	25.6	8.2	6.7	25
Ddt	ENSRNOG00000001239	4.54289	ENSMUSG00000001666	-0.54988	17.5	11.1	17.5	12.4	10.7	16.6	22.8
Gstt3	ENSRNOG00000001242	-1.97494	ENSMUSG00000001665	-2.58496	0.7	0.1	0.1	0.1	0.1	1.3	1.3
Zcchc8	ENSRNOG00000001243	-0.575879	ENSMUSG00000029427	0.251062	9.2	7.2	8.6	4.6	1.5	5.8	6.6
Pcbp3	ENSRNOG00000001245	3.45164	ENSMUSG00000001120	3.32277	2.8	57.2	15.4	5.7	1.8	1.1	7.5
Clip1	ENSRNOG00000001247	3.58351	ENSMUSG00000049550	0.63964	9.1	12.1	3.4	2.4	1.2	12.9	17.6
Chst12	ENSRNOG00000001252	2.69762	ENSMUSG00000036599	-1.39967	8.8	5.9	10.2	2.8	3.7	67.1	0.8
Eif3b	ENSRNOG00000001253	1.08607	ENSMUSG00000056076	-0.33228	27.3	28.7	38.1	36	26.1	45.6	43.7
Atxn2	ENSRNOG00000001256	0.613989	ENSMUSG00000042605	0.790473	20	17.7	9.7	12.2	10	4.6	4.9
Snx8	ENSRNOG00000001258	1.83675	ENSMUSG00000029560	-0.734454	5.6	11.5	12.7	11.6	7.9	74.4	2.6
Cux2	ENSRNOG00000001259	2.35112	ENSMUSG00000042589	0.201048	0.7	4.1	6	7.4	4.6	2.6	0.1
Ppp1cc	ENSRNOG00000001269	-2.19351	ENSMUSG00000004455	0.130332	20.5	30.1	28.2	21.1	9.1	19.8	66.3
Card6	ENSRNOG00000001271	-0.583437	ENSMUSG00000041849	-2.80735	0.2	0.1	0.2	0.1	0.1	1.8	1.8
Mcm3ap	ENSRNOG00000001272	4.2225	ENSMUSG00000001150	0.209096	6.9	6.3	7.4	6.3	3.4	4.5	4.2
Psmg3	ENSRNOG00000001273	0.515537	ENSMUSG00000029551	-0.507122	5.6	5.5	12.2	7.7	5.9	8.3	7.2
Vps29	ENSRNOG00000001274	3.22868	ENSMUSG00000029462	-0.308827	25.7	35.4	41.2	46.2	49.9	41.9	58.2
Pcnt	ENSRNOG00000001276	3.5047	ENSMUSG00000001151	0.0577155	2.7	1.7	2.1	1.9	0.5	1	1.6
Mafk	ENSRNOG00000001277	-2.50831	ENSMUSG00000018143	-3.03793	23	6.1	18.4	15	11.5	133.6	99.1
Gpn3	ENSRNOG00000001278	0.225333	ENSMUSG00000029464	0.51916	4.5	7.5	6.4	5.3	3.9	2.7	8.6
Anapc7	ENSRNOG00000001283	1.37957	ENSMUSG00000029466	-0.353096	9.5	11.6	17.3	12	9.5	23.3	17.3
Atp2a2	ENSRNOG00000001285	0.648636	ENSMUSG00000029467	0.800411	96.4	66.5	42.8	44.9	26.7	8	10.3
LOC498154	ENSRNOG00000001289	5.19246	ENSMUSG00000053553	-0.463947	3	2.9	3.4	1.9	1.2	8.2	6.3
Get4	ENSRNOG00000001293	2.26181	ENSMUSG00000025858	-0.0825626	8.5	13.3	12	17.3	18.5	11.4	16.8
Ift81	ENSRNOG00000001294	0.254495	ENSMUSG00000029469	1.16697	5.2	6.1	5.9	2.3	0.9	0.4	1.6
S100b	ENSRNOG00000001295	-3.55253	ENSMUSG00000033208	-4.4093	31.2	6.3	98.9	252.6	416.1	3.7	0.7
Prmt2	ENSRNOG00000001297	2.07517	ENSMUSG00000020230	1.81394	16.2	49.4	28.5	12.8	9.2	9.9	7.7
Sun1	ENSRNOG00000001299	0.63378	ENSMUSG00000036817	0.485427	19.6	16.1	14.2	9.9	5.4	7	12.9
P2rx4	ENSRNOG00000001300	-4.62394	ENSMUSG00000029470	-1.76907	3.7	2	5.6	4.6	6.8	17.9	2.3
Adora2a	ENSRNOG00000001302	-4.36603	ENSMUSG00000020178	-1.93161	4.3	1.8	0.9	0.1	0.2	0.7	35
Specc1l	ENSRNOG00000001303	5.85158	ENSMUSG00000033444	0.0347654	11.8	11.2	10.3	8.2	4.4	5.8	25.1
Bcr	ENSRNOG00000001304	4.45642	ENSMUSG00000009681	1.6256	11.8	21.6	7	4	2.7	2.3	14.2
Camkk2	ENSRNOG00000001309	1.56304	ENSMUSG00000029471	1.09638	3.9	9.8	7.5	2.1	2.8	7.1	4.1
Rab36	ENSRNOG00000001311	-0.277723	ENSMUSG00000020175	1.78898	8.8	9.1	3.8	2	0.6	0.5	0.1
Pdgfa	ENSRNOG00000001312	3.37438	ENSMUSG00000025856	0.882164	2	32.9	8.5	37.1	23	34.8	1.7
Gnaz	ENSRNOG00000001313	5.5827	ENSMUSG00000040009	2.8548	1.4	17	6.9	3.7	1.3	0.6	0.2
Fam20c	ENSRNOG00000001314	3.08664	ENSMUSG00000025854	1.50785	20.8	25.5	12.6	4.8	1	7.6	7
Anapc5	ENSRNOG00000001316	-0.198555	ENSMUSG00000029472	0.874776	35	78.3	50.2	38.8	42.3	31.2	58.7
Zfp68	ENSRNOG00000001317	3.21911	ENSMUSG00000058291	0.435736	3.2	3.9	4.6	2.5	0.6	0.7	5.7
Zfp157	ENSRNOG00000001323	0.668227	ENSMUSG00000036898	0.532495	3.2	2.7	3.7	2.1	0.5	0.5	1.2
Il3ra	ENSRNOG00000001325	-0.43036	ENSMUSG00000068758	-1.91754	0.4	0.6	0.3	0.6	0.2	2.9	9.2
Rnf34	ENSRNOG00000001331	4.31672	ENSMUSG00000029474	-0.215143	10.6	11.4	15.1	18.5	20.3	8.6	6.3
Psmd9	ENSRNOG00000001339	-1.57683	ENSMUSG00000029440	-0.119685	5.1	7.9	10.3	10.4	8.2	7	10.5
Aldh2	ENSRNOG00000001344	-2.39171	ENSMUSG00000029455	-0.766043	24.9	16.7	33.5	13	4.4	45.8	48.8
Mapkapk5	ENSRNOG00000001345	4.70522	ENSMUSG00000029454	-0.199492	15.3	12.7	12.4	17.1	14.3	10.7	17.7
Cops6	ENSRNOG00000001346	-1.41514	ENSMUSG00000019494	-0.216177	22.5	43.2	55	55.5	54.5	43.3	70.3
Erp29	ENSRNOG00000001348	-0.462453	ENSMUSG00000029616	-0.731334	37.2	53.9	70.4	52.3	41.1	268.3	67.6
Mcm7	ENSRNOG00000001349	-4.46741	ENSMUSG00000029730	0.177459	2.6	3.6	7.1	3.2	1.3	2.2	2.7
Naa25	ENSRNOG00000001350	4.92749	ENSMUSG00000042719	0.67929	8.2	7.9	6.3	6	1.2	2.6	5.3
Trafd1	ENSRNOG00000001351	3.06169	ENSMUSG00000042726	1.12108	9.9	29.4	17.7	8.8	3.2	33.2	8.3
Taf6	ENSRNOG00000001355	1.28969	ENSMUSG00000036980	0.232661	8.6	9.4	12.5	5.9	2.6	10.1	8.3
Mblac1	ENSRNOG00000001357	2.56128	ENSMUSG00000049285	0.555215	0.8	1.2	1	0.4	0.7	1	1
Rasal1	ENSRNOG00000001374	4.25842	ENSMUSG00000029602	-0.188762	0.1	3.1	1.2	8.2	9.5	2	0.2
Mettl7a	ENSRNOG00000001376	-4.44978	ENSMUSG00000054619	-0.575773	4.6	3.5	4.8	1.3	2.4	17.2	1
Mettl7a	ENSRNOG00000001376	-4.44978	ENSMUSG00000056487	-0.584963	0.1	0.1	0.1	0.1	0.1	0.4	0.1
Plbd2	ENSRNOG00000001385	-1.27115	ENSMUSG00000029598	0.533949	18.1	25.7	10	9.7	10.7	43.4	14.6
LOC100910540	ENSRNOG00000001387	0.656895	ENSMUSG00000029726	0.343205	6.2	14.8	11.2	9.7	5.5	16.9	20.5
Agfg2	ENSRNOG00000001404	2.53916	ENSMUSG00000029722	0.589594	13.3	7.8	6.3	3.4	3.1	3.1	1.9
Actl6b	ENSRNOG00000001408	2.76406	ENSMUSG00000029712	4.28352	0.2	38.3	5.2	1.5	1.9	2.6	0.4
Gnb2	ENSRNOG00000001409	-0.947725	ENSMUSG00000029713	-0.497465	74.7	143.5	157.8	281.7	248.5	242.8	210
Gigyf1	ENSRNOG00000001410	5.73346	ENSMUSG00000029714	1.33942	13	15.9	7.3	5.9	1.7	7.2	2.6
Serpine1	ENSRNOG00000001414	-2.87986	ENSMUSG00000037411	-3.14714	0.2	1.3	1.7	0.1	0.1	45.6	21.4
Ap1s1	ENSRNOG00000001415	-1.26199	ENSMUSG00000004849	-0.0546721	13.4	39.7	47	53.9	53.1	36.2	43.8
LOC100909521	ENSRNOG00000001416	-0.515611	ENSMUSG00000037428	5.36287	2.5	67.9	2.8	0.4	2	1.5	0.7
Znhit1	ENSRNOG00000001418	0.87245	ENSMUSG00000059518	0.658192	4.8	19.7	11.3	11.5	13.1	17.6	16.6
Cldn15	ENSRNOG00000001419	1.2348	ENSMUSG00000001739	0.847997	0.1	0.3	0.1	0.2	0.1	0.1	0.4
Fis1	ENSRNOG00000001420	5.26685	ENSMUSG00000019054	-0.853597	29.8	51.9	69.7	117	167.9	84.3	94
Prkrip1	ENSRNOG00000001426	0.953404	ENSMUSG00000039737	0.335791	4.7	6.1	4	4.3	5.4	5.2	5.4
Orai2	ENSRNOG00000001427	1.11203	ENSMUSG00000039747	1.50941	0.4	27.9	5.7	5.6	3.8	41.5	1.8
Alkbh4	ENSRNOG00000001428	0.890924	ENSMUSG00000039754	0.176878	2	2.6	4	2.9	1.4	2	1.5
Lrwd1	ENSRNOG00000001429	4.25084	ENSMUSG00000029703	-0.399931	4.7	4.8	6.8	2.8	1.1	17.4	5.2
Polr2j	ENSRNOG00000001430	-2.60765	ENSMUSG00000039771	-0.00576502	16.1	33.3	41.8	41.5	33.1	20.9	47.2
Ywhag	ENSRNOG00000001436	0.0841705	ENSMUSG00000051391	3.01193	17.8	275.2	46.9	35.7	38	48.9	17.4
RGD1307391	ENSRNOG00000001439	-0.229988	ENSMUSG00000039860	3.09954	0.1	12	6.3	1.1	0.2	0.6	0.1
Mdh2	ENSRNOG00000001440	0.186046	ENSMUSG00000019179	0.423457	62	120.3	104	110.7	78.9	85.4	97.2
Por	ENSRNOG00000001442	1.39352	ENSMUSG00000005514	-1.20451	35.3	17.4	29.2	25.4	24.5	91.9	34.3
Rhbdd2	ENSRNOG00000001443	4.37081	ENSMUSG00000039917	0.135883	8.3	8.9	13.3	11.7	7.7	4.9	2.7
Hip1	ENSRNOG00000001448	-6.99952	ENSMUSG00000039959	-1.55095	17.4	6.2	38.4	14.9	7.9	2	28.4
Pom121	ENSRNOG00000001449	6.88069	ENSMUSG00000053293	0.458955	9.6	12.6	9.6	13.3	5.5	13.3	3.7
Fzd9	ENSRNOG00000001452	-4.31439	ENSMUSG00000049551	-2.02975	22.3	1.8	16.8	3.8	0.7	0.3	0.2
Baz1b	ENSRNOG00000001453	2.50363	ENSMUSG00000002748	-0.0214797	15.7	10	13.7	9.6	3.7	5.5	12.7
Eif4h	ENSRNOG00000001454	3.33793	ENSMUSG00000040731	-0.0322995	44.2	87.6	90.7	86	114.7	111.7	90.2
Kif13a	ENSRNOG00000001455	-2.03831	ENSMUSG00000021375	-0.933505	7	3.7	17.7	7.5	3.9	1.9	4.4
Nup153	ENSRNOG00000001456	1.34441	ENSMUSG00000021374	0.505007	15.5	13.6	12.2	9.2	2.2	6.6	11.8
Rfc2	ENSRNOG00000001457	4.08078	ENSMUSG00000023104	-0.230006	11.4	16.2	24	14.8	20	19.5	24.3
Limk1	ENSRNOG00000001470	1.50377	ENSMUSG00000029674	0.612133	4.8	13.4	10.9	3.5	4.5	25.9	3
Gtf2i	ENSRNOG00000001479	0.27003	ENSMUSG00000060261	-0.247375	58.3	45.8	66.6	69.6	38	36.6	57.1
Ncf1	ENSRNOG00000001480	-0.681268	ENSMUSG00000015950	-9.4182	0.3	0.1	6.4	0.4	0.9	401.7	0.8
Psmb1	ENSRNOG00000001488	-0.13281	ENSMUSG00000014769	-0.655636	34.7	64.4	86.5	115.6	134	88.4	149.5
Tbp	ENSRNOG00000001489	2.80235	ENSMUSG00000014767	0.61193	11.4	10.8	9.6	5.7	2.7	3.1	9.9
Pdcd2	ENSRNOG00000001490	4.12392	ENSMUSG00000014771	0.288721	4.5	6.8	6.9	5.5	4.7	6.7	5.1
Slc8a2	ENSRNOG00000001492	4.35894	ENSMUSG00000030376	1.1709	11.1	18.5	24.2	9.1	2.6	2	0.3
Kptn	ENSRNOG00000001493	3.21868	ENSMUSG00000006021	0.13978	5.7	7.4	9.4	5.2	5.2	4.7	10.1
Napa	ENSRNOG00000001494	-2.35495	ENSMUSG00000006024	-0.136156	26.9	35.7	28.2	37.1	42.2	70.2	30.8
Rab4b	ENSRNOG00000001500	3.10564	ENSMUSG00000053291	-0.770266	21.7	19.7	15.4	39.2	54.1	41	30.2
Snrpa	ENSRNOG00000001501	4.37034	ENSMUSG00000061479	0.110703	12.7	17.6	23.2	16.5	10.8	20.8	13.8
Rapgef4	ENSRNOG00000001516	-2.18335	ENSMUSG00000049044	-1.69353	1.6	5.9	5.1	20.3	59.4	2.4	25.7
Pdk1	ENSRNOG00000001517	3.58128	ENSMUSG00000006494	-0.428584	6.1	5.3	4	9.7	4	9.9	9.1
Itga6	ENSRNOG00000001518	-3.94979	ENSMUSG00000027111	-2.40047	47.5	2.8	3.2	0.3	0.3	15.1	22.3
Dlx1	ENSRNOG00000001520	-2.41173	ENSMUSG00000041911	7.92125	0.7	60.6	0.2	0.1	0.3	0.1	0.1
Hat1	ENSRNOG00000001524	-3.42085	ENSMUSG00000027018	-0.156342	11.8	8.3	11.9	5.2	3.7	8	14.9
Igsf11	ENSRNOG00000001525	-2.89813	ENSMUSG00000022790	-1.34314	26	3.6	2.6	16.7	9.2	0.2	0.1
Cd80	ENSRNOG00000001527	1.2755	ENSMUSG00000075122	-2.96963	0.1	0.1	0.5	0.1	0.1	3.5	0.4
Gap43	ENSRNOG00000001528	5.90113	ENSMUSG00000047261	4.88136	2.5	347.3	49	7.7	7	2.3	2.2
Chac2	ENSRNOG00000001531	-1.74521	ENSMUSG00000020309	0.747516	4.5	6.1	3.6	4.8	5	0.3	3.6
Cyyr1	ENSRNOG00000001544	-8.11075	ENSMUSG00000041134	-5.62936	0.2	0.1	0.1	0.1	0.1	0.2	29
Nfe2l2	ENSRNOG00000001548	-3.437	ENSMUSG00000015839	-3.31619	11.9	2.1	3.2	2.2	5	55.7	47.5
Atp5j	ENSRNOG00000001551	-0.589085	ENSMUSG00000022890	0.0947175	43.5	75.8	77.9	61.3	61.8	36.4	145
Btg3	ENSRNOG00000001555	1.42409	ENSMUSG00000022863	-0.222392	0.1	0.1	0.1	0.1	0.1	0.2	0.1
Mtx2	ENSRNOG00000001559	6.47406	ENSMUSG00000027099	0.917135	12.4	26.5	14.8	12.7	15	6.8	22.5
Usp25	ENSRNOG00000001573	0.319585	ENSMUSG00000022867	-1.4355	9.9	3.5	6.2	13.3	8.4	3.9	15.1
Nrip1	ENSRNOG00000001585	2.43815	ENSMUSG00000048490	-0.722936	4.5	3.1	3.9	1.8	0.5	5.8	14.2
Cct8	ENSRNOG00000001592	1.19313	ENSMUSG00000025613	0.523994	33.6	55.6	60.2	48.7	18.6	24.2	46.7
Atp5g3	ENSRNOG00000001596	0.985055	ENSMUSG00000018770	0.531923	143.3	243	197.8	178.2	145.2	110	233.9
Atf2	ENSRNOG00000001597	-1.80169	ENSMUSG00000027104	1.18763	13.3	20.5	13.3	10	3.9	2.6	10.9
Usp16	ENSRNOG00000001598	-0.152621	ENSMUSG00000025616	-0.494961	15.1	7.9	13.8	15.1	5.1	5.4	12.3
Ltn1	ENSRNOG00000001602	2.5925	ENSMUSG00000052299	0.117094	8.1	6.2	9.1	6.9	2.3	1.2	6.7
N6amt1	ENSRNOG00000001603	0.0147376	ENSMUSG00000044442	0.409876	1.8	3.1	3.6	2.2	1.5	0.7	4.2
Adamts1	ENSRNOG00000001607	-3.74787	ENSMUSG00000022893	-4.09496	57.3	3.2	28.1	4.5	1.1	111.3	125.8
Cep97	ENSRNOG00000001609	-0.181338	ENSMUSG00000022604	-0.154886	4.2	2.5	3.6	3.8	2.3	0.3	2.5
Rpl24	ENSRNOG00000001611	-0.35229	ENSMUSG00000098274	-0.877828	2.2	3.9	5.7	4.4	5.5	9.9	15.3
Zbtb11	ENSRNOG00000001613	2.61299	ENSMUSG00000022601	0.783508	11.8	10.5	6.8	4.7	1	1.8	10.5
Senp7	ENSRNOG00000001616	5.86336	ENSMUSG00000052917	0.912914	6.2	7.5	7	4.1	1.4	1.2	4
C2cd2	ENSRNOG00000001621	0.853014	ENSMUSG00000045975	-1.0313	2.5	1.9	2.4	4.4	3.8	2	8.2
Pcp4	ENSRNOG00000001628	0.98419	ENSMUSG00000090223	3.58353	0.9	301.9	79.9	24	28.4	13.8	4.1
Wrb	ENSRNOG00000001629	1.37491	ENSMUSG00000023147	0.738054	9.7	22.1	22.5	21.4	14.8	6.6	4.5
Brwd1	ENSRNOG00000001632	-1.79924	ENSMUSG00000022914	0.668218	15.4	21.4	19.5	20	9.7	5.9	10.3
Tfg	ENSRNOG00000001633	0.552194	ENSMUSG00000022757	0.271834	19.8	29.6	34	38.4	23.5	8.9	22.5
Tbc1d23	ENSRNOG00000001642	-0.449501	ENSMUSG00000022749	-0.0202724	10.1	10.6	14.8	20.6	3.8	4.4	10.8
Psmg1	ENSRNOG00000001643	4.7427	ENSMUSG00000022913	-0.241251	7	7.6	12	10.7	6.9	6.4	10.9
Filip1l	ENSRNOG00000001645	-0.861818	ENSMUSG00000043336	0.757143	0.2	4	2.1	0.4	0.3	3.5	7.7
Ets2	ENSRNOG00000001647	1.67076	ENSMUSG00000022895	0.096676	8.6	19.8	9	3.5	0.5	27.3	62.2
St3gal6	ENSRNOG00000001653	-6.18887	ENSMUSG00000022747	-5.56188	3	0.7	17.9	3.4	1.1	53.1	119.9
Cpox	ENSRNOG00000001654	-0.949995	ENSMUSG00000022742	-2.8645	2.5	3.3	6.6	68.9	61.3	2.5	2.4
Cldnd1	ENSRNOG00000001657	2.44819	ENSMUSG00000022744	-1.04449	43.9	29.8	64.8	113.2	96.2	19.9	30.8
Dyrk1a	ENSRNOG00000001662	1.89528	ENSMUSG00000022897	0.574923	22.2	17.9	13	12.3	3.8	11	9.8
Dscr3	ENSRNOG00000001681	2.90588	ENSMUSG00000022898	-0.717718	16.3	8.3	12.4	13	10.4	14.9	14.9
Ttc3	ENSRNOG00000001682	0.360069	ENSMUSG00000040785	1.95093	35.7	81.9	49.1	18.4	5.6	3.1	15.2
Arl6	ENSRNOG00000001689	3.79325	ENSMUSG00000022722	0.919627	7.8	12.8	11.2	6.8	5.8	0.6	8.4
Setd4	ENSRNOG00000001699	0.910534	ENSMUSG00000022948	0.49304	2.4	1.9	1.8	1.4	0.4	1.2	0.9
Dfnb31	ENSRNOG00000001700	0.148034	ENSMUSG00000039137	1.89691	5.9	10.8	2.1	0.9	1.2	6.1	1.2
Kalrn	ENSRNOG00000001706	4.78101	ENSMUSG00000061751	0.110183	20.3	6.8	7.4	1.7	3.4	2.9	2.1
Dvl3	ENSRNOG00000001708	1.78619	ENSMUSG00000003233	1.25526	14.7	25.9	15.6	20.1	9.7	2.7	2.3
Ap2m1	ENSRNOG00000001709	1.49032	ENSMUSG00000022841	0.661008	18.2	70.6	50.4	49.5	48.5	56.5	44.8
Abcf3	ENSRNOG00000001710	4.41387	ENSMUSG00000003234	0.012824	10.9	11.3	14.2	11.1	8.6	13.1	9.3
Hrasls	ENSRNOG00000001711	1.79958	ENSMUSG00000022525	-0.479168	0.1	1.1	6.4	2.3	0.2	0.1	0.1
Alg3	ENSRNOG00000001712	2.70578	ENSMUSG00000033809	-1.23739	14.7	4.1	15.1	8.2	4.4	9.6	6
AABR07034532.1	ENSRNOG00000001713	-2.37709	ENSMUSG00000017057	-2.66676	4	1	3.3	0.2	0.2	10.7	19.7
Opa1	ENSRNOG00000001717	-0.930622	ENSMUSG00000038084	0.323349	11.5	12.7	12.1	17.1	8.6	3.1	8.5
Psmd2	ENSRNOG00000001719	1.20567	ENSMUSG00000006998	0.0359751	20.7	29.1	36.7	40	22.6	22.2	28.1
Hes1	ENSRNOG00000001720	-0.447458	ENSMUSG00000022528	-3.85638	131	3.1	7.8	0.9	0.2	22.1	107.4
Tmem44	ENSRNOG00000001726	4.43221	ENSMUSG00000022537	-1.7084	33.9	5.1	5.5	1.7	0.5	20.6	37.8
Lsg1	ENSRNOG00000001727	-2.76737	ENSMUSG00000022538	-0.36257	9	5.6	7.3	7.1	3.4	6.8	9.6
Fam43a	ENSRNOG00000001728	-0.0185561	ENSMUSG00000046546	-0.320976	2.4	10.1	1.3	10.8	2.3	14	44.9
Acap2	ENSRNOG00000001730	5.86562	ENSMUSG00000049076	-0.415037	19	9.7	12.4	13.5	10.9	12	9.8
Ppp1r2	ENSRNOG00000001733	0.315844	ENSMUSG00000047714	0.730924	11.6	27.8	10.7	8.5	5.9	7.4	56.4
Bdh1	ENSRNOG00000001736	2.79147	ENSMUSG00000046598	0.206003	29.9	24.8	18.1	48.1	31	1.3	0.6
Eif4g1	ENSRNOG00000001738	-0.822179	ENSMUSG00000045983	0.29799	53.3	51.8	45.3	52.2	28	26.9	47.1
Ncbp2	ENSRNOG00000001746	3.39614	ENSMUSG00000022774	-0.0835343	8.2	13.7	19.5	25.8	16.9	5	11.7
Pak2	ENSRNOG00000001747	3.71324	ENSMUSG00000022781	-0.697172	16.6	13.6	21.7	26	12.7	20.2	35.1
LOC100912534	ENSRNOG00000001748	4.17685	ENSMUSG00000021018	-0.131759	6.8	6.1	6.4	7.4	3.3	7.7	8.5
Chrd	ENSRNOG00000001750	-1.03484	ENSMUSG00000006958	1.83551	3.6	6.9	5.6	1.3	0.2	0.7	0.2
Wdr53	ENSRNOG00000001754	6.13108	ENSMUSG00000022787	-0.0310269	3.2	2.3	3.1	2.3	2	1.5	2
Tm4sf19	ENSRNOG00000001757	-1.22835	ENSMUSG00000079625	3.20343e-16	0.1	0.1	0.1	0.1	0.1	0.1	0.1
Tctex1d2	ENSRNOG00000001758	-0.503843	ENSMUSG00000014075	0.415037	5.8	11	7.4	7.1	8.3	7.2	13.7
Pcyt1a	ENSRNOG00000001762	-1.43676	ENSMUSG00000005615	-0.809722	11.5	8.7	18.2	19.9	13.3	14.3	14.3
Vps8	ENSRNOG00000001764	2.62563	ENSMUSG00000033653	-0.744958	5	5.4	11.8	14.7	9.4	8.7	4.7
Tfrc	ENSRNOG00000001766	-2.97731	ENSMUSG00000022797	-3.18493	28.8	16.3	17.5	24.3	15.1	5.5	798.2
Tnk2	ENSRNOG00000001769	-3.38157	ENSMUSG00000022791	-0.0762836	35.6	22.1	30.3	30.7	11.3	10.1	21.8
Ehhadh	ENSRNOG00000001770	0.104649	ENSMUSG00000022853	-2.51658	1.9	0.3	1	3	2.9	0.5	1
Senp2	ENSRNOG00000001773	2.3394	ENSMUSG00000022855	0.303069	10.1	9.5	8.4	6.7	2.8	10.4	7.8
Lrch3	ENSRNOG00000001774	-2.61579	ENSMUSG00000022801	-0.726624	10.9	5.6	9.7	16	1.4	4.8	12.8
Lmln	ENSRNOG00000001781	-0.0475376	ENSMUSG00000022802	1.37084	1.6	2.5	0.8	1.3	0.5	1	0.6
Osbpl11	ENSRNOG00000001782	0.306861	ENSMUSG00000022807	-0.677356	8.8	4.2	6.6	3.6	1.7	12.1	7.5
Tra2b	ENSRNOG00000001783	-1.41984	ENSMUSG00000022858	0.483379	27.6	30.5	29	25.9	8.2	9.1	31.1
Etv5	ENSRNOG00000001785	4.44985	ENSMUSG00000013089	-1.58642	31.6	5.5	34.8	4.2	1.1	25.8	1.6
Snx4	ENSRNOG00000001786	2.21675	ENSMUSG00000022808	-0.00311934	13.8	15.4	19	19	8.9	9.3	22.6
Zfp148	ENSRNOG00000001789	2.476	ENSMUSG00000022811	0.320259	8.8	7.2	7.5	4.3	1.2	1.7	11.1
Dgkg	ENSRNOG00000001796	1.6419	ENSMUSG00000022861	3.51096	0.1	1.9	0.4	0.1	0.2	0.1	0.1
Umps	ENSRNOG00000001797	3.23493	ENSMUSG00000022814	-0.0671142	4.2	4.2	5.5	1.6	1.2	11.1	2.8
Dnajb11	ENSRNOG00000001803	2.73325	ENSMUSG00000004460	-0.897629	35.1	19.1	44.3	52.2	23.5	28.5	29.9
Sspn	ENSRNOG00000001807	-5.65407	ENSMUSG00000030255	-2.81307	4.1	0.6	5.7	5.9	9	0.3	0.3
Fgfr1op2	ENSRNOG00000001811	-3.66764	ENSMUSG00000040242	-0.166217	12.9	10.1	15.4	11.6	7.6	7.3	13.2
Dnm1l	ENSRNOG00000001813	0.109248	ENSMUSG00000022789	1.42642	33.4	39.6	18.6	12.3	3.5	1.8	18.8
Eif4a2	ENSRNOG00000001815	0.161742	ENSMUSG00000022884	1.38493	102.1	192.3	98.4	84.6	32.5	27.1	97.1
Rfc4	ENSRNOG00000001816	0.257735	ENSMUSG00000022881	-0.817136	2.6	2.1	8.2	2.6	2	1.3	5.5
Tm7sf3	ENSRNOG00000001817	6.23667	ENSMUSG00000040234	-2.06393	24.6	10.3	63.6	95.6	46.5	8.4	19.7
Med21	ENSRNOG00000001820	0.211892	ENSMUSG00000030291	-0.718952	12.4	13.7	18.9	24.4	31.2	10.3	38.1
Adipoq	ENSRNOG00000001821	0.359881	ENSMUSG00000022878	3.20343e-16	0.1	0.1	0.1	0.1	0.1	0.1	0.1
St6gal1	ENSRNOG00000001823	-3.04155	ENSMUSG00000022885	-1.10281	6.4	4.4	13.7	4.8	5.8	12.4	13.6
Stk38l	ENSRNOG00000001828	3.72645	ENSMUSG00000001630	-0.882164	10.7	1.7	1.8	1.1	0.6	3.2	1.4
Ube2v2	ENSRNOG00000001829	3.93151	ENSMUSG00000022674	1.8036	1	3.2	1.6	1.3	0.5	0.1	1
Mzt2b	ENSRNOG00000001834	3.04395	ENSMUSG00000022671	-0.78508	12.1	11.5	20.8	15.1	11.6	41.6	17.7
Sst	ENSRNOG00000001837	0.453661	ENSMUSG00000004366	8.09674	2.1	707.2	3.7	0.6	4.1	2.5	2.5
Mrps35	ENSRNOG00000001842	-0.527462	ENSMUSG00000040112	0.163499	11	11.2	11.7	7.6	3.6	8.1	18
Bcl6	ENSRNOG00000001843	-0.60912	ENSMUSG00000022508	-0.135883	12.4	5.4	12.4	1.9	0.5	7	1.4
Top3b	ENSRNOG00000001845	-0.953922	ENSMUSG00000022779	-0.130308	9.8	6.7	8.2	6	3.1	8.8	8.1
Ccdc91	ENSRNOG00000001847	-2.92491	ENSMUSG00000030301	-0.562344	3.2	5	6.9	8.3	8.7	5.3	11.9
Far2	ENSRNOG00000001851	5.30638	ENSMUSG00000030303	0.0259952	2.4	2.8	1.6	0.8	0.2	0.2	11.3
Ergic2	ENSRNOG00000001852	-0.0334004	ENSMUSG00000030304	-0.0102392	16.6	11.7	15.6	12.9	6	5	14.6
Sdf2l1	ENSRNOG00000001859	-6.50544	ENSMUSG00000022769	-2.49399	3.7	3.5	27.1	27.1	9.8	44.7	5.9
Ydjc	ENSRNOG00000001861	1.83675	ENSMUSG00000041774	3.31832	0.1	13.3	1.8	1.4	2.1	1.7	0.9
Tmem191c	ENSRNOG00000001864	2.16406	ENSMUSG00000055692	1.12423	2.7	10.1	11.6	5.5	3.3	3.9	0.8
Snap29	ENSRNOG00000001867	-2.08802	ENSMUSG00000022765	-0.943073	4.4	5.6	8.8	12.9	11.8	20.2	6.5
Lztr1	ENSRNOG00000001870	-1.18309	ENSMUSG00000022761	0.247928	21	28.5	26.2	31.8	35.3	15.1	14.6
Slc7a4	ENSRNOG00000001874	2.24712	ENSMUSG00000022756	2.18955	3.5	11.1	5.5	2.7	1.4	1.3	0.2
Smpd4	ENSRNOG00000001875	6.39757	ENSMUSG00000005899	0.516067	9.7	9.2	9.6	5.9	2.3	6.3	4.8
Klhl22	ENSRNOG00000001878	4.58779	ENSMUSG00000022750	1.16993	11.2	19.5	14.2	7.6	4.8	8.8	5.4
Dgcr6	ENSRNOG00000001880	0.652843	ENSMUSG00000003531	0.197071	14.7	17.1	19.3	15	15	8.2	17.3
RGD1565297	ENSRNOG00000001884	0.25052	ENSMUSG00000005732	0.235769	19.7	30.4	37.3	31.1	13.8	19	34
Dgcr8	ENSRNOG00000001886	4.11472	ENSMUSG00000022718	0.163006	3.6	3.9	4.9	4.5	3	1.3	3.6
Arvcf	ENSRNOG00000001888	1.53605	ENSMUSG00000000325	0.603375	3.4	13.8	17.1	12.8	3.3	16.1	1.8
Comt	ENSRNOG00000001889	1.37471	ENSMUSG00000000326	-1.31487	15.2	12.3	31.1	22.6	16.4	76.4	21.9
AABR07034742.1	ENSRNOG00000001893	0.0615374	ENSMUSG00000020349	0.000390076	68	123.3	132.9	202.7	135.7	91.4	108.9
Map6d1	ENSRNOG00000001911	2.64388	ENSMUSG00000041205	-4.71333	0.8	1	7	68.4	80.2	0.9	0.1
Tp63	ENSRNOG00000001924	-2.37709	ENSMUSG00000022510	-0.415037	0.3	0.1	0.1	0.1	0.1	0.1	0.1
Il1rap	ENSRNOG00000001928	2.56231	ENSMUSG00000022514	-3.69067	6	1.9	44.2	58.4	33.3	0.4	4.9
Fgf12	ENSRNOG00000001931	1.61347	ENSMUSG00000022523	1.82129	5.3	18.2	17.9	5	1.6	0.5	0.6
Dzip3	ENSRNOG00000001956	2.22063	ENSMUSG00000064061	1.4777	12.8	14.9	11	5.5	0.6	0.3	1.9
Ift57	ENSRNOG00000001958	0.788557	ENSMUSG00000032965	1.16993	8.4	9.6	8.6	3.9	2.2	0.7	1.8
Mx2	ENSRNOG00000001963	-0.261529	ENSMUSG00000023341	-0.736966	1.3	1	0.3	4.8	1.6	0.5	1.5
Cd47	ENSRNOG00000001964	0.258772	ENSMUSG00000055447	0.759623	21.4876	37.3	19.1	33.2	34.7	9.7	14
Bbx	ENSRNOG00000001971	4.30933	ENSMUSG00000022641	1	4.5	4.9	2.6	2.9	1.1	0.7	2.9
Rcan1	ENSRNOG00000001979	1.93684	ENSMUSG00000022951	-2.59315	9.6	21	28.7	12.8	13.6	679.4	16.2
Cblb	ENSRNOG00000001982	2.04268	ENSMUSG00000022637	0.708111	10	5.5	3.3	1.9	1.2	1.7	2.1
Alcam	ENSRNOG00000001989	1.21832	ENSMUSG00000022636	-0.323863	53	14.9	45.2	10.6	1	0.3	1.8
Atp5o	ENSRNOG00000001991	-0.927401	ENSMUSG00000022956	0.289871	25	58.6	52.3	43.6	46.9	42	77.8
Atp6v1a	ENSRNOG00000001992	0.799569	ENSMUSG00000052459	0.917702	21.2	65.3	42.1	42.4	24.7	39.6	37.4
Ythdc1	ENSRNOG00000001996	1.31471	ENSMUSG00000035851	0.467966	31.3	21.9	17.3	13.1	4.3	4.6	24.4
Itsn1	ENSRNOG00000002001	3.17292	ENSMUSG00000022957	0.328949	23.4	10.3	9.7	5.1	2.1	4	4.9
Tmprss11f	ENSRNOG00000002005	-2.37709	ENSMUSG00000048764	3.20343e-16	0.1	0.1	0.1	0.1	0.1	0.1	0.1
Gnrhr	ENSRNOG00000002011	-1.39527	ENSMUSG00000029255	3.20343e-16	0.1	0.1	0.1	0.1	0.1	0.1	0.1
Sidt1	ENSRNOG00000002013	1.54935	ENSMUSG00000022696	2.41504	0.1	1.6	0.8	0.1	0.3	0.4	0.1
Son	ENSRNOG00000002021	-2.07095	ENSMUSG00000022961	-0.540427	139.8	31.8	44	35.9	9.4	23.8	24.6
Epha5	ENSRNOG00000002024	0.387536	ENSMUSG00000029245	1.94386	5.2	8.4	6.4	1.2	0.1	0.1	0.1
Tmem50b	ENSRNOG00000002028	5.10668	ENSMUSG00000022964	-0.114115	35.2	32.6	38	52.1	49	23.1	14.3
Ifngr2	ENSRNOG00000002032	0.648325	ENSMUSG00000022965	0.543882	8.7	25.1	10.7	5.2	4.9	57.5	16.3
Paqr3	ENSRNOG00000002035	1.30429	ENSMUSG00000055725	1.21681	3.4	4.3	3.3	1.9	0.9	0.6	1
Evi5	ENSRNOG00000002039	-2.55608	ENSMUSG00000011831	-0.132104	17.1	7.3	11.3	7.3	0.9	1.4	10
Bmp2k	ENSRNOG00000002040	-6.05294	ENSMUSG00000034663	-1.3599	8.1	2	2.9	1.5	1.8	10.4	6.1
Boc	ENSRNOG00000002041	0.628485	ENSMUSG00000022687	-0.655352	12.4	2	3.1	0.4	0.1	0.2	2.7
Gtpbp8	ENSRNOG00000002044	-3.06762	ENSMUSG00000022668	0.507886	5	4.1	4.5	2.7	1.9	0.8	2.4
Anxa3	ENSRNOG00000002045	-5.66417	ENSMUSG00000029484	-6.43185	0.9	0.3	3.2	0.2	0.8	41.3	109
Igfbp7	ENSRNOG00000002050	-3.34969	ENSMUSG00000036256	-4.98618	9.4	5.3	11.1	9.8	2.1	4.7	970.8
Synj1	ENSRNOG00000002051	0.97861	ENSMUSG00000022973	1.45457	13.3	22.2	13	8.8	3.5	4	6
Glmn	ENSRNOG00000002054	2.37277	ENSMUSG00000029276	0.292181	7.8	4	3.4	2.4	0.9	0.4	4.7
Ptpn13	ENSRNOG00000002061	-0.342653	ENSMUSG00000034573	-2.46815	11.5	0.5	3.4	1	0.3	0.1	0.3
Slc35a5	ENSRNOG00000002069	2.53702	ENSMUSG00000022664	-0.707819	11	6	14.6	15.5	13.8	2.5	1.4
Cnot6l	ENSRNOG00000002075	2.1953	ENSMUSG00000034724	0.394406	5.6	10.8	7.6	3.2	0.9	3.2	28.8
Mapk10	ENSRNOG00000002079	2.65112	ENSMUSG00000046709	2.29546	3.1	13.5	9.1	2.3	1.5	0.4	0.1
Urb1	ENSRNOG00000002080	4.13335	ENSMUSG00000039929	0.125531	2.7	1.6	1.8	1.5	0.3	1.4	1.1
Ccng2	ENSRNOG00000002089	-3.36954	ENSMUSG00000029385	-0.315596	15.1	27.4	15.1	11.3	6.6	23.3	133.2
Gtf3c3	ENSRNOG00000002091	2.28824	ENSMUSG00000041303	0.140178	5.5	3.6	4.3	3.4	1.3	0.6	4.5
Tgfbr3	ENSRNOG00000002093	-2.084	ENSMUSG00000029287	-2.05889	0.1	0.2	0.7	0.1	0.1	0.3	3.7
Atg3	ENSRNOG00000002094	-4.61808	ENSMUSG00000022663	-0.332575	16.9	13.5	21.1	22.8	18.8	10.2	12.2
Rasl11b	ENSRNOG00000002097	2.2295	ENSMUSG00000049907	-0.321928	26.3	5.8	4.8	3.1	6.1	1.9	1.3
Srp72	ENSRNOG00000002100	3.14296	ENSMUSG00000036323	0.104045	17.9	20.6	20.3	17.3	9.5	12.6	37.4
Paics	ENSRNOG00000002101	-2.0156	ENSMUSG00000029247	-0.253541	25.9	21.6	33	18.6	24.3	11.9	40.8
Scaf4	ENSRNOG00000002104	0.382881	ENSMUSG00000022983	0.223775	8.9	5.8	5.4	4.7	1.7	4.8	4.3
Usp46	ENSRNOG00000002106	-0.936627	ENSMUSG00000054814	0.458993	11.4	13.7	13.5	7.9	7.8	1.9	17.3
Zfp644	ENSRNOG00000002112	2.51813	ENSMUSG00000049606	0.22542	7.8	5.3	6.3	4.3	1.7	1	6.1
Sod1	ENSRNOG00000002115	-0.914627	ENSMUSG00000022982	-0.268543	22.6	33.4	36.3	28.7	30	33.5	90.3
Lrrc8d	ENSRNOG00000002121	-0.230546	ENSMUSG00000046079	0.704453	5.2	19.5	15.8	16	11.1	16.9	6.8
Lrrc8c	ENSRNOG00000002122	-1.20279	ENSMUSG00000054720	0.3614	3.9	8.8	3	3.2	3.8	1.8	25.4
Ccni	ENSRNOG00000002125	-1.64266	ENSMUSG00000063015	0.155265	23.7	82	63.3	49.9	79.2	124.1	101.6
Ncam2	ENSRNOG00000002126	0.571501	ENSMUSG00000022762	0.0927571	9.7	9.1	16.1	20.6	4.6	0.1	0.1
Ppat	ENSRNOG00000002128	0.992638	ENSMUSG00000029246	0.273761	2.8	2.7	3.4	1.4	1.1	1.5	3.2
Lrrc8b	ENSRNOG00000002129	-3.50346	ENSMUSG00000070639	0.338802	1.6	12.9	8.2	25	13.5	2.6	10.3
Sgcb	ENSRNOG00000002135	2.48405	ENSMUSG00000029156	-0.0931094	24.1	14	22.5	25.4	14	1.5	2.1
Aasdh	ENSRNOG00000002137	-0.3472	ENSMUSG00000055923	0.346176	5	2.5	3	1.6	0.4	1	0.8
RGD1311575	ENSRNOG00000002139	3.17177	ENSMUSG00000036377	2.29278	1.4	14.7	7	2.6	1.7	0.1	5.2
Cd200	ENSRNOG00000002141	2.74726	ENSMUSG00000022661	3.23546	4.9	130.6	30.1	7.4	2.5	0.3	38
Cds1	ENSRNOG00000002142	4.84542	ENSMUSG00000029330	0.872888	0.5	7.6	1.8	0.7	2.1	19.7	0.1
Pkd2	ENSRNOG00000002146	4.2236	ENSMUSG00000034462	-0.0284284	12.5	6.7	14.3	5.9	0.5	0.6	7.2
Dcun1d4	ENSRNOG00000002152	4.08828	ENSMUSG00000051674	1.0665	9.2	14.8	7.5	12	7.8	1.3	4.6
Cep135	ENSRNOG00000002153	-3.21423	ENSMUSG00000036403	0.36257	3.3	2.1	2.3	0.7	0.2	0.6	2.7
Klf3	ENSRNOG00000002163	-7.93808	ENSMUSG00000029178	-1.72814	19.5	4.1	9.6	5.2	3.5	10.9	32.8
Clock	ENSRNOG00000002175	4.58556	ENSMUSG00000029238	-0.359542	13.9	5.3	7.9	5.7	1.7	1.8	9.8
Gnpda2	ENSRNOG00000002177	2.44945	ENSMUSG00000029209	-0.728815	10.7	7.1	16.8	10.1	7.5	3.3	22.2
Mrps18c	ENSRNOG00000002178	1.83675	ENSMUSG00000016833	-0.268935	7.1	12.2	19	14.3	17.7	8.4	21.7
Tbc1d1	ENSRNOG00000002180	-0.0124597	ENSMUSG00000029174	-0.89377	3.9	2.7	3.9	1.8	0.5	6.8	13.2
Helq	ENSRNOG00000002181	-7.13132	ENSMUSG00000035266	0.509674	3.1	2.8	3.2	2.8	0.8	0.5	1.4
Pgm2	ENSRNOG00000002185	-0.707193	ENSMUSG00000029171	-0.924051	6.1	6.5	7.8	5	1.4	6	47.7
Nudt9	ENSRNOG00000002186	2.20676	ENSMUSG00000029310	-1.10639	18.7	9.8	25.7	16	14.3	20.3	31.6
LOC498368	ENSRNOG00000002191	-1.94359	ENSMUSG00000060512	-3.75352	13.9	1.3	33.5	6.9	4.4	46.4	0.1
Rell1	ENSRNOG00000002192	0.0611029	ENSMUSG00000047881	-1.13812	6	10.7	13.1	43.5	10.1	1.1	67.5
Coq2	ENSRNOG00000002194	2.18695	ENSMUSG00000029319	-1.15258	14.6	6.2	11.5	17.8	16.8	11.6	10.4
Ociad2	ENSRNOG00000002196	0.853014	ENSMUSG00000029153	0.786596	0.2	2.3	3.1	1.2	2.3	1	0.2
Tmem165	ENSRNOG00000002199	2.2964	ENSMUSG00000029234	-0.643345	26.4	11.3	21.6	13.8	11.8	7.7	24.6
Lin54	ENSRNOG00000002203	-0.829303	ENSMUSG00000035310	-0.852443	2.5	1.8	4.8	4.1	1.3	2.8	4
Ociad1	ENSRNOG00000002205	2.13617	ENSMUSG00000029152	0.208678	45.3	82.3	75.9	78.6	67.7	78	81.8
Guf1	ENSRNOG00000002207	0.782062	ENSMUSG00000029208	0.486077	12.6	7.4	8.1	4	1.2	0.7	5.1
Shroom3	ENSRNOG00000002208	5.81097	ENSMUSG00000029381	-0.115477	0.3	0.4	0.2	0.5	1.2	0.1	0.3
Klhl8	ENSRNOG00000002214	6.16918	ENSMUSG00000029312	1.20282	3.6	6.1	3.6	2.2	2.6	1.3	2.6
Srd5a3	ENSRNOG00000002216	-5.1969	ENSMUSG00000029233	-2.08838	7	3.1	11.1	11.3	15.7	27.8	6.2
Kit	ENSRNOG00000002227	0.879007	ENSMUSG00000005672	3.19824	0.4	28.3	6.4	0.9	0.4	0.1	10.3
Adcy5	ENSRNOG00000002229	-0.578377	ENSMUSG00000022840	0.838957	0.7	17.5	15.9	16.1	24.5	1.3	0.2
Aff1	ENSRNOG00000002232	-1.19295	ENSMUSG00000029313	-2.67243	13	0.8	2.6	0.7	0.6	6.3	7.4
Dirc2	ENSRNOG00000002240	1.42025	ENSMUSG00000022848	0.0276122	13.9	21.1	25.7	25.2	18.9	26.3	14.2
Hspbap1	ENSRNOG00000002241	-3.61411	ENSMUSG00000022849	0.206451	0.6	0.5	0.3	0.4	0.3	0.6	0.4
Pdgfra	ENSRNOG00000002244	-9.85433	ENSMUSG00000029231	-3.68119	0.1	8.8	596.2	79.6	0.7	0.3	0.4
Nup54	ENSRNOG00000002247	-1.01629	ENSMUSG00000034826	0.81405	7.3	6.3	3.4	2.8	0.9	2.3	4.8
Fryl	ENSRNOG00000002248	-1.29487	ENSMUSG00000070733	-1.44805	7.8	2.7	9.3	15	5.4	1.8	4.9
Sec31a	ENSRNOG00000002251	-0.70639	ENSMUSG00000035325	-0.0478596	15.3	16.8	15	16.2	8.9	22.6	26.2
Tmem33	ENSRNOG00000002254	0.174027	ENSMUSG00000037720	-0.512167	15.5	14	23.6	34.7	24.1	9.7	12.2
Art3	ENSRNOG00000002256	-4.31773	ENSMUSG00000034842	-1.47681	1.9	1	0.4	0.1	0.1	0.3	13.9
Tmem150c	ENSRNOG00000002258	4.09462	ENSMUSG00000050640	2.152	0.5	6	2	1	3.2	1.2	0.2
Enoph1	ENSRNOG00000002262	0.246625	ENSMUSG00000029326	-1.2936	7.6	12	14.2	51.3	80.4	15.3	7.7
Casr	ENSRNOG00000002265	-0.783903	ENSMUSG00000051980	-4.91488	0.1	0.1	0.1	15.5	2.2	0.1	0.1
Chic2	ENSRNOG00000002267	3.07429	ENSMUSG00000029229	-0.755763	14.1	12.2	19.8	9.9	2.8	20.2	56.8
Slain2	ENSRNOG00000002271	1.4163	ENSMUSG00000036087	0.123829	6.2	7.7	7.2	5.6	2.5	3.8	17.1
Lnx1	ENSRNOG00000002272	0.729758	ENSMUSG00000029228	-0.793549	4.7	7	58.8	8.2	0.4	0.3	0.4
Naaa	ENSRNOG00000002273	-2.40312	ENSMUSG00000029413	-1.96829	22.4	2.3	4	3	9.2	13.9	1.5
Fip1l1	ENSRNOG00000002275	5.87266	ENSMUSG00000029227	-0.2852	12.4	12.2	40	12.1	4.5	6.8	13.4
Phf6	ENSRNOG00000002276	-1.94487	ENSMUSG00000025626	0.321928	7.1	8.5	16.6	7.6	2	0.8	6.7
Tec	ENSRNOG00000002278	3.56846	ENSMUSG00000029217	-5.00749	0.3	0.1	0.9	0.1	0.1	10.7	7.2
Sh3bgrl	ENSRNOG00000002280	-2.37709	ENSMUSG00000031246	0.665025	32.6	47.7	28.8	11.3	13	1.3	93.5
Hnrpd	ENSRNOG00000002292	5.41704	ENSMUSG00000000568	1.23087	15.5	27.5	20.9	10.7	2.5	9	11.7
Uso1	ENSRNOG00000002301	0.274927	ENSMUSG00000029407	-0.007268	17.1	13.2	14.6	16.3	7.1	6.8	17.7
Kcnj12	ENSRNOG00000002303	4.85896	ENSMUSG00000042529	1.6845	0.1	1.5	0.2	1.4	0.6	0.2	0.3
Slc15a2	ENSRNOG00000002305	-4.95978	ENSMUSG00000022899	-2.53436	160.6	5.4	18.6	2.1	1.2	2.3	2.9
Hlx	ENSRNOG00000002309	-6.00853	ENSMUSG00000039377	-5.88264	1.5	0.1	0.5	0.1	0.1	19.4	13.8
Limch1	ENSRNOG00000002318	3.7851	ENSMUSG00000037736	-1.42609	49.1	6.5	8.1	14.8	15	0.3	17.5
Tsn	ENSRNOG00000002319	-0.171183	ENSMUSG00000026374	1.44345	18.5	49	28.7	19.8	10.9	13.6	16.6
Commd8	ENSRNOG00000002320	-2.37324	ENSMUSG00000029213	-0.3858	6.5	8.1	10.5	7.3	5.3	14.7	19.2
RGD1566265	ENSRNOG00000002323	-1.31678	ENSMUSG00000031242	1.65605	1.1	5.2	3.5	1.8	0.8	0.5	2.2
Gabrb1	ENSRNOG00000002327	-0.506481	ENSMUSG00000029212	-0.788496	18.1	2.2	3.4	0.5	0.4	0.3	0.1
Gabra4	ENSRNOG00000002336	2.44567	ENSMUSG00000029211	-0.0947782	12.4	2.7	3.8	0.3	0.4	0.2	0.2
Dgke	ENSRNOG00000002338	5.42984	ENSMUSG00000000276	0.891476	3.4	6.4	3.5	3.4	1.1	0.2	9.1
Mark1	ENSRNOG00000002339	5.68967	ENSMUSG00000026620	1.3065	10.6	15.5	13.7	6.8	4.7	0.7	1.1
Aldh3a2	ENSRNOG00000002342	2.96657	ENSMUSG00000010025	-0.630427	16.6	11.8	22.5	23.7	15.9	11.5	19.4
Uchl1	ENSRNOG00000002343	2.41631	ENSMUSG00000029223	3.53505	7	460.2	56.5	30.4	64.6	14.5	65.2
Rasgef1b	ENSRNOG00000002345	1.87143	ENSMUSG00000089809	-2.65678	11.7	8	25	104.8	30.1	130	1.1
Rgl1	ENSRNOG00000002347	6.051	ENSMUSG00000026482	-2.004	9.6	3	5	1.1	0.9	19.7	35.9
Tsen15	ENSRNOG00000002352	-2.42216	ENSMUSG00000014980	0.0694648	5.6	3.9	5.5	1.3	0.7	2.4	6.8
Rab3gap2	ENSRNOG00000002353	1.49127	ENSMUSG00000039318	-0.312278	25.9	10	16.4	11.6	6.3	6.4	7.9
Scpep1	ENSRNOG00000002358	3.18144	ENSMUSG00000000278	-1.20645	10.9	7.8	14.2	4.2	2.4	65.6	10.7
Prkg2	ENSRNOG00000002361	6.6217	ENSMUSG00000029334	-1.80735	0.1	0.4	6.8	1.2	0.1	0.1	0.1
Rnf112	ENSRNOG00000002364	5.13173	ENSMUSG00000010086	1.81943	0.3	23	9.6	11.1	13.5	4.3	0.3
Itm2a	ENSRNOG00000002365	-10.3611	ENSMUSG00000031239	-3.99462	10.5	22.1	19.2	19.9	5.2	4.5	2054.4
Iars2	ENSRNOG00000002368	0.917042	ENSMUSG00000026618	-0.154577	15.3	8.4	10.5	8.6	6.3	4.1	11.3
Rgs8	ENSRNOG00000002369	1.00061	ENSMUSG00000042671	4.93074	0.1	6.1	0.3	0.1	0.3	0.3	0.1
Akap1	ENSRNOG00000002373	1.11015	ENSMUSG00000018428	0.620296	6.5	9.3	8.3	7.6	4.4	3.4	6.1
Bpnt1	ENSRNOG00000002378	3.61476	ENSMUSG00000026617	0.0443941	12.9	17.6	15.5	25.2	32.6	7.1	9.1
Bmp3	ENSRNOG00000002381	6.59248	ENSMUSG00000029335	2	0.1	0.6	0.4	0.1	0.1	0.1	0.1
Tceal1	ENSRNOG00000002387	0.175184	ENSMUSG00000049536	1.48447	5.8	20.1	13.5	7	5.2	3.1	8.5
Trim41	ENSRNOG00000002388	5.27986	ENSMUSG00000040365	-0.199123	17.8	12.5	11	12.3	19.3	16.6	9.1
Morf4l2	ENSRNOG00000002389	1.47225	ENSMUSG00000031422	0.665956	55.7	132.8	92.6	135.2	71.8	37.4	109.5
Eprs	ENSRNOG00000002393	-0.504117	ENSMUSG00000026615	0.0790125	22.1	17.2	20.8	23.2	9.3	8	14.3
Tpr	ENSRNOG00000002394	0.115728	ENSMUSG00000006005	0.0475284	13.4	7.2	9.2	4.7	1.1	1.8	11.6
Slc30a10	ENSRNOG00000002397	-2.63891	ENSMUSG00000026614	-1.53478	64.7	3.9	1.4	0.1	0.2	0.1	1.3
Pdxdc1	ENSRNOG00000002407	-0.865917	ENSMUSG00000022680	-0.850606	13.5	13.3	19	29.4	35.5	14.6	31.9
Gpc4	ENSRNOG00000002413	-0.73218	ENSMUSG00000031119	-0.930395	21.5	2.3	2.9	0.2	0.2	0.1	1.4
Tgfb2	ENSRNOG00000002418	2.11395	ENSMUSG00000039239	-1.19555	27.7	3.1	3.7	0.7	0.1	0.1	10.3
Plp1	ENSRNOG00000002419	-5.85987	ENSMUSG00000031425	-9.25748	4.2	5.5	54.3	9674.1	10457.8	6.6	0.3
Zc3h7a	ENSRNOG00000002420	-2.89962	ENSMUSG00000037965	-0.886991	24.8	7.3	15.6	9.8	2.1	4.9	23.8
Lpar4	ENSRNOG00000002428	-0.670652	ENSMUSG00000049929	-2.1964	3.5	0.4	1.3	0.4	0.1	0.1	5.6
G3bp2	ENSRNOG00000002433	1.64993	ENSMUSG00000029405	0.822324	20.1	44	39.7	32.7	13.7	12.1	31
Tmem100	ENSRNOG00000002434	-5.08899	ENSMUSG00000069763	-3.82443	28.2	1.7	87.7	15.5	0.8	8	4.3
Mmd	ENSRNOG00000002436	0.523013	ENSMUSG00000003948	0.666998	45.8	39.8	27	5.8	6.2	10.4	55.2
Ralb	ENSRNOG00000002440	1.28841	ENSMUSG00000004451	-2.13561	11.6	5.2	14.8	6.2	3.4	47.6	53.5
Mfap3	ENSRNOG00000002443	1.39908	ENSMUSG00000020522	-0.459432	12.3	6.4	11.5	9.4	2.5	7.4	9.7
Maged2	ENSRNOG00000002449	-1.08482	ENSMUSG00000025268	0.833331	26.2	46	42.8	25.3	10.7	14.7	35.2
Rrp15	ENSRNOG00000002450	1.09847	ENSMUSG00000001305	0.0489096	4.6	4	6.1	3.7	0.5	2.3	6
Fndc3c1	ENSRNOG00000002451	-0.913943	ENSMUSG00000033737	3.20343e-16	0.1	0.1	0.1	0.1	0.1	0.1	0.1
Fndc3c1	ENSRNOG00000002451	-0.913943	ENSMUSG00000073012	3.20343e-16	0.1	0.1	0.1	0.1	0.1	0.1	0.1
Txndc11	ENSRNOG00000002452	2.34153	ENSMUSG00000022498	0.0396837	14.9	8.6	9	5.9	1.8	7.7	10.9
Rnf2	ENSRNOG00000002454	-2.07599	ENSMUSG00000026484	-0.0877046	11.4	11.7	10.5	6.2	1.6	17.6	27.3
Nid1	ENSRNOG00000002461	-2.05802	ENSMUSG00000005397	-3.6763	3.9	1.7	7.5	0.6	1.2	0.3	116.9
LOC100911746	ENSRNOG00000002462	-1.44007	ENSMUSG00000001039	0.134301	7.7	6	4.7	3.5	3.3	1.1	12.5
Tnr	ENSRNOG00000002468	-4.76447	ENSMUSG00000015829	-3.7575	0.7	3.4	111.4	158.6	5	0.1	0.1
Tom1l1	ENSRNOG00000002474	1.60448	ENSMUSG00000020541	-0.325359	27.3	5.6	7.5	1.9	0.7	4.1	0.6
Gpr137b	ENSRNOG00000002480	-1.91654	ENSMUSG00000021306	-1.42196	6.2	5.2	12.8	8.3	6.7	45.9	3.7
Cdkl2	ENSRNOG00000002506	1.27218	ENSMUSG00000029403	3.95777	0.2	10.1	0.5	1.4	1.2	0.2	0.4
Gnl3l	ENSRNOG00000002509	-0.196652	ENSMUSG00000025266	2.04134	8.2	47.2	16.1	17.3	12.6	2.1	12.5
Flt4	ENSRNOG00000002511	-1.66448	ENSMUSG00000020357	-5.39803	0.2	0.1	0.1	0.1	0.1	0.1	24.7
Mtm1	ENSRNOG00000002516	-1.64351	ENSMUSG00000031337	-1.02554	3.6	1.4	3.4	2.4	2.2	0.6	4.9
Gpr37	ENSRNOG00000002524	-0.79323	ENSMUSG00000039904	-5.12042	5.5	1.4	1.1	92.7	192.6	0.2	0.1
Ptgs2	ENSRNOG00000002525	3.91793	ENSMUSG00000032487	-2.92961	6.3	0.7	1.3	0.2	0.1	6	18.1
Rap2c	ENSRNOG00000002529	-0.655144	ENSMUSG00000050029	0.114269	11.4	11.6	11.7	14.7	6	5.1	15.4
C1galt1c1	ENSRNOG00000002536	-1.07521	ENSMUSG00000048970	-0.815658	8.8	6.6	13	15.2	11.9	4.1	16.7
Kifap3	ENSRNOG00000002544	2.89533	ENSMUSG00000026585	1.39855	11.6	40.6	37.5	24.9	9.2	2.4	6.8
RGD1309748	ENSRNOG00000002545	3.75842	ENSMUSG00000022507	0.560633	21.4	14.7	10	8.1	3.7	4.1	12.5
Rchy1	ENSRNOG00000002546	-2.88245	ENSMUSG00000029397	0.355675	13.1	16.4	13.5	14.3	13	8.5	14.5
Htr5b	ENSRNOG00000002549	2.42536	ENSMUSG00000050534	1.58496	0.1	0.3	0.1	0.1	0.1	0.1	0.1
Tsr2	ENSRNOG00000002556	2.34615	ENSMUSG00000025264	0.9855	4.7	13.2	12.5	10.5	6.1	2.9	3.3
Mcts1	ENSRNOG00000002563	1.06084	ENSMUSG00000042814	0.301002	6.4	7.7	5.1	5.9	5.6	3.1	11.4
Mrps14	ENSRNOG00000002569	-0.791893	ENSMUSG00000058267	-0.489656	8.5	7.3	11.8	8.3	5.7	9	18.2
Cacybp	ENSRNOG00000002572	-0.00281883	ENSMUSG00000014226	0.951956	15.1	31.5	25.4	18.6	11.9	4.9	21.8
Nubp1	ENSRNOG00000002574	5.35975	ENSMUSG00000022503	-0.744345	4.9	3.9	6.5	4.9	4.1	9.9	8.9
Sap30l	ENSRNOG00000002575	0.712386	ENSMUSG00000020519	0.207029	6.8	9.6	12.2	8	8	8.2	6.7
Parm1	ENSRNOG00000002579	6.95887	ENSMUSG00000034981	0.710493	0.3	7.5	4	10.1	12.7	0.1	0.3
Cul4b	ENSRNOG00000002585	1.59802	ENSMUSG00000031095	0.861395	10.9	11.9	10.4	5.9	1.8	1.5	8.8
Rps6ka6	ENSRNOG00000002592	0.853014	ENSMUSG00000025665	1.54146	2.9	4.9	5.4	1.4	0.1	0.1	0.2
Sox9	ENSRNOG00000002607	-5.41609	ENSMUSG00000000567	-1.05262	93.2	8.3	5.5	1	0.3	0.3	3
Carhsp1	ENSRNOG00000002610	2.68562	ENSMUSG00000008393	-0.525202	12.1	29.3	14	76.9	117.4	10.3	22.3
Ddx52	ENSRNOG00000002612	4.08825	ENSMUSG00000020677	-0.533035	9.2	4.4	8.1	6.1	2.5	3.8	8.5
Ivns1abp	ENSRNOG00000002618	-0.514388	ENSMUSG00000023150	0.277799	39.5	55	61.3	32.6	3.6	77.4	57.8
Ptpn4	ENSRNOG00000002625	4.0028	ENSMUSG00000026384	0.475045	10.3	6	7.4	3.8	0.5	0.3	3.6
Kctd3	ENSRNOG00000002627	-4.52913	ENSMUSG00000026608	0.0387324	9.1	15.1	16.8	16.3	28.7	2.9	14.4
Cnot8	ENSRNOG00000002630	0.199075	ENSMUSG00000020515	-0.373289	12	14.9	18.5	11.9	7.8	31.9	33.7
Naca	ENSRNOG00000002632	1.93536	ENSMUSG00000061315	-0.0524674	6.1	5.4	5.6	4.7	1.8	3.9	11.5
Dexi	ENSRNOG00000002635	3.76115	ENSMUSG00000038055	-0.384265	15	7.7	16.1	7.6	4.1	11.3	6.2
Abat	ENSRNOG00000002636	-0.155048	ENSMUSG00000057880	1.0099	53.3	53.6	32.6	49	20.5	2.1	2.2
Ptges3	ENSRNOG00000002642	-1.24177	ENSMUSG00000071072	0.440393	26.1	28.7	27.2	22.2	18.7	12.8	19.9
Ugdh	ENSRNOG00000002643	2.08339	ENSMUSG00000029201	-0.912537	14	10.2	73.8	16.4	1.5	4	5.5
Utp18	ENSRNOG00000002644	2.8275	ENSMUSG00000054079	0.0944647	9.3	7.1	7.8	5.8	2.2	4.8	10
Rap1gap2	ENSRNOG00000002652	-0.400193	ENSMUSG00000038807	0.499795	4.3	7.4	13.6	4.3	3	6.1	0.1
Kcnk2	ENSRNOG00000002653	4.28303	ENSMUSG00000037624	0.875891	21.1	14.1	19.6	3.5	0.8	0.8	0.3
Magee1	ENSRNOG00000002660	4.06579	ENSMUSG00000031227	3.05097	5.1	60.5	19.9	9.8	7	1.1	0.9
Lamc2	ENSRNOG00000002667	3.26275	ENSMUSG00000026479	1.58496	0.1	0.3	0.1	0.1	0.1	0.1	0.1
Nme2	ENSRNOG00000002671	4.55579	ENSMUSG00000020857	-0.54005	10.2	23.2	17.3	23.8	23.9	30.2	97
Lamc1	ENSRNOG00000002680	-0.112775	ENSMUSG00000026478	-3.37868	16	2.7	22.2	23.3	9.7	2.1	95.2
Zfp692	ENSRNOG00000002682	2.7449	ENSMUSG00000037243	0.623251	13.5	10.5	11.8	8.2	1.7	2.8	2.9
Nme1	ENSRNOG00000002693	-0.0689189	ENSMUSG00000037601	0.543424	14.7	65.9	63.5	77.1	40.8	32.4	42.8
Mtmr1	ENSRNOG00000002697	3.15585	ENSMUSG00000015214	0.433897	7.7	7.7	10.8	5.7	2.2	2.2	5.6
Vps4b	ENSRNOG00000002705	1.47249	ENSMUSG00000009907	0.0411052	10.6	8.9	8.5	7.8	4.1	7.3	13.6
Zfp672	ENSRNOG00000002713	-1.277	ENSMUSG00000049755	-0.0320104	7	5.2	5.9	5.5	4.4	4.3	4.8
Mettl22	ENSRNOG00000002714	-2.725	ENSMUSG00000039345	0.442005	5.3	8.4	10.7	9.6	6.8	2.1	2.6
LOC688963	ENSRNOG00000002721	0.179525	ENSMUSG00000022820	-0.457749	6.7	10.4	17.7	12.7	16.9	12.1	19.6
Sec14l1	ENSRNOG00000002722	-0.828423	ENSMUSG00000020823	0.114864	23.3	29.4	18.6	13.5	19.3	52	36.2
Prpsap2	ENSRNOG00000002724	2.85512	ENSMUSG00000020528	-0.557331	4.8	4.1	7.9	6.4	3.7	10	3.4
Rgs5	ENSRNOG00000002730	-6.14999	ENSMUSG00000026678	-2.55322	8.6	6	6.7	0.5	0.6	0.5	194.4
Dhx9	ENSRNOG00000002735	0.0290595	ENSMUSG00000042699	0.615336	28.9	36	31.2	27.7	9.9	11.5	31.8
Fstl1	ENSRNOG00000002746	2.19888	ENSMUSG00000022816	-0.711875	27.6	5.8	10.1	0.6	0.4	0.5	17.8
Ccdc43	ENSRNOG00000002748	4.57488	ENSMUSG00000020925	-0.0544478	6.3	5.2	6.4	5.8	2.3	3.9	7.7
Spag9	ENSRNOG00000002749	-0.650964	ENSMUSG00000020859	-0.557647	143.3	39.1	74	50.2	24.4	6.9	46.5
Adam11	ENSRNOG00000002753	3.13757	ENSMUSG00000020926	0.0784266	4.7	6.3	8.4	17.1	3.4	1.7	0.5
Pafah1b1	ENSRNOG00000002755	7.77695	ENSMUSG00000020745	1.08846	55.9	93.6	53.7	66.7	31.7	19.7	36.4
Tada2a	ENSRNOG00000002757	-0.577017	ENSMUSG00000018651	0.233633	11.9	6.8	7.1	6.2	3.1	1.9	4.5
Lias	ENSRNOG00000002759	1.84507	ENSMUSG00000029199	0.206451	9.6	8.5	8.5	6.5	5.4	4.5	9.7
Ulk2	ENSRNOG00000002763	-5.89225	ENSMUSG00000004798	0.410508	12.3	21.2	20.9	23.9	15.3	14	9.3
Dlg3	ENSRNOG00000002767	2.83169	ENSMUSG00000000881	1.50514	9.2	16.7	14.8	5	2.5	2.8	1
Rgs4	ENSRNOG00000002773	-0.656959	ENSMUSG00000038530	3.01943	7	57.3	7.2	1.3	3.4	3.8	19.7
Aatf	ENSRNOG00000002778	4.56987	ENSMUSG00000018697	1.48543	5.6	14	6.9	6.8	3	4.6	3.1
Kdsr	ENSRNOG00000002781	4.57131	ENSMUSG00000009905	0.246161	7	6.8	7	7.1	5.9	2.9	4.5
Serpinc1	ENSRNOG00000002783	-0.70639	ENSMUSG00000026715	3.20343e-16	0.1	0.1	0.1	0.1	0.1	0.1	0.1
Dars2	ENSRNOG00000002813	-0.423435	ENSMUSG00000026709	-0.787006	2.6	1.7	4.4	3.9	2.5	1.7	2.5
Eftud2	ENSRNOG00000002818	2.78619	ENSMUSG00000020929	-0.363591	16	15.7	28.6	18.6	11.4	16.8	29.8
LOC24906	ENSRNOG00000002820	-2.01005	ENSMUSG00000058287	3.20343e-16	0.1	0.1	0.1	0.1	0.1	0.1	0.1
Phlpp1	ENSRNOG00000002821	-0.786405	ENSMUSG00000044340	-1.23289	32.5	8.8	25	31	28.1	2	5.5
Mapk9	ENSRNOG00000002823	2.75203	ENSMUSG00000020366	1.5503	13.3	32.9	18.3	14.3	6.5	4.8	10.2
Hsd17b7	ENSRNOG00000002826	1.33735	ENSMUSG00000026675	-0.795529	26.6	7	9.4	21.2	12.8	0.5	2.4
Rbfox1	ENSRNOG00000002827	4.09468	ENSMUSG00000008658	3.26987	0.3	12.7	4.9	0.9	0.8	0.7	0.3
Tob1	ENSRNOG00000002828	-1.38644	ENSMUSG00000037573	0.606214	99.8	53	25.4	24.5	13	3	43.2
Slc16a2	ENSRNOG00000002832	4.00197	ENSMUSG00000033965	-0.795282	18.7	8	20.6	4.4	1.4	0.6	37.6
Gsk3b	ENSRNOG00000002833	0.750062	ENSMUSG00000022812	1.58124	22.4	38.7	18.3	15.1	4	4.2	13.6
Luc7l3	ENSRNOG00000002835	3.67585	ENSMUSG00000020863	0.798528	63.4	38.7	31.6	19.5	5.1	6.8	7.1
Pdzd11	ENSRNOG00000002838	2.90175	ENSMUSG00000015668	-0.207595	14.3	15.4	20.2	18.9	18.5	10.4	24.4
Slc19a2	ENSRNOG00000002839	3.71389	ENSMUSG00000040918	1.22507	4.8	6	5.1	2.7	1	0.5	1.3
Atp5b	ENSRNOG00000002840	-0.9161	ENSMUSG00000025393	0.215172	215.6	384.8	423.5	427.6	277	280.6	364.6
Cdc42bpa	ENSRNOG00000002841	-1.69836	ENSMUSG00000026490	1.06439	11.8	16.8	10.6	11.4	6.6	1.1	6.7
Cxcl6	ENSRNOG00000002843	-0.629374	ENSMUSG00000029371	0.584963	0.1	0.3	0.6	0.2	0.1	0.1	0.1
Maoa	ENSRNOG00000002848	1.31888	ENSMUSG00000025037	-1.67724	14.5	9	13.2	9.4	8	0.9	126.7
Myo19	ENSRNOG00000002852	-0.969943	ENSMUSG00000020527	0.16273	5.9	2.5	3.1	1.5	0.2	0.8	1.9
Rfc1	ENSRNOG00000002855	2.35761	ENSMUSG00000029191	0.342392	12.2	7.1	7.7	4.4	2	1.7	5.6
Nacc1	ENSRNOG00000002864	1.95037	ENSMUSG00000001910	-0.306726	15.4	15.9	26.3	20.7	14.8	24.2	16.6
Rassf6	ENSRNOG00000002866	-0.487758	ENSMUSG00000029370	3.45943	0.1	1.1	0.1	0.1	0.1	0.1	0.1
Rbm25l1	ENSRNOG00000002871	2.06965	ENSMUSG00000010608	0.444785	43.3	24.5	22.5	16.1	3.5	5.3	17.3
Rbm25	ENSRNOG00000002874	1.94011	ENSMUSG00000010608	0.444785	43.3	24.5	22.5	16.1	3.5	5.3	17.3
Klhl20	ENSRNOG00000002875	-1.71567	ENSMUSG00000026705	0.115966	6.3	4.1	3.9	3.8	2.4	1	5.3
Psen2	ENSRNOG00000002879	5.81835	ENSMUSG00000010609	0.82415	6.2	10.8	6.7	4.9	5.2	8.2	5.4
Ddr2	ENSRNOG00000002881	0.305209	ENSMUSG00000026674	-0.273018	3.9	0.8	0.6	0.1	0.1	0.1	1
Blzf1	ENSRNOG00000002884	-2.37709	ENSMUSG00000026577	-0.415037	5.4	2.8	3.8	5.2	2.3	0.7	5
Myh10	ENSRNOG00000002886	-0.317417	ENSMUSG00000020900	0.337513	7.4	15.9	13.2	3.1	0.5	1.4	49.9
Nagpa	ENSRNOG00000002895	1.50377	ENSMUSG00000023143	-3.17477	2.6	1.1	5.5	4	3.4	37	7.1
Prdx6	ENSRNOG00000002896	-3.02146	ENSMUSG00000026701	-2.15153	164.7	15.2	87.1	35.8	65.7	22.5	29.4
Nme7	ENSRNOG00000002898	-2.19379	ENSMUSG00000026575	0.377158	14.1	7.1	5.5	1.7	1.4	2	8.1
Akap10	ENSRNOG00000002899	2.57409	ENSMUSG00000047804	-0.0482552	6.4	4.9	5.4	7	1.9	4.8	4.9
Specc1	ENSRNOG00000002903	-5.1359	ENSMUSG00000042331	-2.95031	32.9	2.4	14.3	34.3	21.4	7.7	0.7
Slc35a4	ENSRNOG00000002908	2.89707	ENSMUSG00000033272	-1.33009	16.3	9.4	29.8	30.3	25.6	25.9	13.9
Alb	ENSRNOG00000002911	-5.79905	ENSMUSG00000029368	-0.415037	0.1	0.1	0.1	0.1	0.1	0.3	0.1
Parn	ENSRNOG00000002912	1.779	ENSMUSG00000022685	-0.0524674	8	7.2	8.6	7.3	4.8	7.2	8.9
Trmt1	ENSRNOG00000002914	3.95892	ENSMUSG00000001909	0.305132	14	15.3	11.9	10.9	7.4	14.3	15.8
Car4	ENSRNOG00000002916	-9.92458	ENSMUSG00000000805	-5.40443	2.6	2.4	2	0.2	0.7	3	601.4
Gfap	ENSRNOG00000002919	-5.46306	ENSMUSG00000020932	-2.23457	126.9	5.9	6.4	4.3	18.4	7	3.6
Adora2b	ENSRNOG00000002922	-0.845981	ENSMUSG00000018500	-2.41504	33.3	1.4	8.8	1.3	0.4	0.7	0.3
Uap1	ENSRNOG00000002926	1.82256	ENSMUSG00000026670	0.527568	11.3	15.4	10.8	13.6	12	4.9	11.5
Guk1	ENSRNOG00000002928	-2.6884	ENSMUSG00000020444	-0.387767	17.3	24.7	24	41.1	66.8	17.4	27.3
Atp1b1	ENSRNOG00000002934	0.778696	ENSMUSG00000026576	2.28155	167.9	205.5	53.7	8.5	8.7	4.4	10.4
Ankrd40	ENSRNOG00000002935	5.03916	ENSMUSG00000020864	-1.52632	23	10.6	21.2	43.1	56.9	16.9	22.1
Ankrd17	ENSRNOG00000002940	1.70341	ENSMUSG00000055204	0.460634	13.1	10	9.5	7.5	2.5	3	8
Uhmk1	ENSRNOG00000002941	1.58596	ENSMUSG00000026667	0.920383	6.1	14.1	7.6	11.6	9.8	3.5	6.1
Mrpl55	ENSRNOG00000002943	0.644307	ENSMUSG00000036860	-0.291302	6.9	7.3	7.7	10.5	10	5.6	12.9
RGD1304587	ENSRNOG00000002944	1.21175	ENSMUSG00000020441	-0.189971	4.8	4.5	4.2	3.5	3	9.1	6.2
Pgs1	ENSRNOG00000002949	0.587404	ENSMUSG00000017715	0.26018	9.5	20.2	12.4	15.3	22.8	30.5	10.7
Stim2	ENSRNOG00000002956	-3.56076	ENSMUSG00000039156	-0.603483	4.4	4.3	14.9	7	1.3	1.8	9.8
LOC100909913	ENSRNOG00000002960	-2.85838	ENSMUSG00000040138	-2.29278	16.7	1	8.6	1.5	2.1	0.4	0.1
C1ql1	ENSRNOG00000002963	-3.76418	ENSMUSG00000045532	-3.15508	0.6	8.5	358.2	93	1.7	0.7	0.1
Ttc19	ENSRNOG00000002977	3.2758	ENSMUSG00000042298	1.36565	10.5	13.4	8.7	5.4	1.9	1.8	2.9
Tsr1	ENSRNOG00000002980	2.93634	ENSMUSG00000038335	0.0460964	8.3	5.3	6.8	6	1.4	5.3	3
Nmt1	ENSRNOG00000002989	5.44216	ENSMUSG00000020936	-1.12661	15.5	14.9	23.7	21.7	13.1	89.3	31.9
Srr	ENSRNOG00000002991	2.20294	ENSMUSG00000001323	-0.582852	12.1	7.6	18.7	16.7	11.4	2.7	6.7
Slc9a3r2	ENSRNOG00000002997	-7.30007	ENSMUSG00000002504	-2.47259	3.1	8.6	7.6	35.7	72	4.6	163.4
Tbc1d19	ENSRNOG00000003003	3.95357	ENSMUSG00000039178	-0.754643	19.4	7.3	18.4	16	8.4	1.9	9.8
Rasgef1c	ENSRNOG00000003005	4.09001	ENSMUSG00000020374	2.96047	0.1	4.8	0.9	0.5	1.2	0.9	0.1
Gadd45gip1	ENSRNOG00000003011	3.03222	ENSMUSG00000033751	0.907606	4.2	12.6	10.5	7.3	5.4	7.9	5
Poglut1	ENSRNOG00000003014	1.89634	ENSMUSG00000034064	-0.679632	11	7.7	20.6	12.2	14.8	5.4	10
Olfml2b	ENSRNOG00000003018	-0.223553	ENSMUSG00000038463	-1.53973	3.3	0.9	1.4	1.8	3.3	5.3	0.6
Ubn1	ENSRNOG00000003019	-2.58818	ENSMUSG00000039473	-0.134037	12.8	10.1	9	7.9	3.2	18.1	15.5
Rad23a	ENSRNOG00000003026	0.648963	ENSMUSG00000003813	-0.19008	10.2	12.9	14.9	17.7	19.9	13.2	12.4
Calr	ENSRNOG00000003029	-1.51886	ENSMUSG00000003814	-0.901815	217.7	156.3	358.8	289.6	130.1	435.1	320.9
Atp2b4	ENSRNOG00000003031	3.31873	ENSMUSG00000026463	0.791729	19.6	8.8	8	1.7	0.4	0.3	0.5
Plcd3	ENSRNOG00000003033	-1.61375	ENSMUSG00000020937	2.53766	0.7	3	0.6	0.2	0.4	0.7	0.5
Smg6	ENSRNOG00000003041	0.365436	ENSMUSG00000038290	0.213707	7.4	6.9	7	4.5	2.1	6.5	8.2
Tiprl	ENSRNOG00000003048	1.38012	ENSMUSG00000040843	0.186151	8.6	9.5	10.4	7.9	4.3	4.8	14.1
Tbc1d9b	ENSRNOG00000003050	0.400998	ENSMUSG00000036644	-1.55106	11.1	12.2	20.2	33.7	105.9	26.6	17
Glyr1	ENSRNOG00000003065	1.66694	ENSMUSG00000022536	0.318918	30.8	37.9	39.5	34.1	17.6	30.1	30.2
Cd38	ENSRNOG00000003069	-1.04205	ENSMUSG00000029084	-2.8848	13.3582	0.5	1	0.1	0.2	1.7	5.8
Vamp4	ENSRNOG00000003071	2.67272	ENSMUSG00000026696	0.959214	12.2	18.6	16.6	10.4	4.9	5	8.3
Tmem39a	ENSRNOG00000003075	-1.73385	ENSMUSG00000002845	-0.899749	11.8	3.6	6.8	5.4	2	5.8	8.5
Dcaf6	ENSRNOG00000003078	4.65995	ENSMUSG00000026571	-0.118905	11.5	9.7	11.5	8.6	4.8	3.7	23.1
Parp1	ENSRNOG00000003084	3.75673	ENSMUSG00000026496	-0.682165	9.2	11	27.2	34.1	10.9	14.9	9.6
Cenpv	ENSRNOG00000003086	3.3254	ENSMUSG00000018509	0.507271	7.2	12.2	26.5	7.7	2.5	5.7	1.9
Prom1	ENSRNOG00000003098	-6.33726	ENSMUSG00000029086	-4.91754	14.9	1.2	1.8	39.5	9.1	0.4	151.9
Ubqln2	ENSRNOG00000003099	2.84642	ENSMUSG00000050148	2.38054	20	80.8	33.2	16.4	9.7	6.4	7.4
Trpv2	ENSRNOG00000003104	4.91055	ENSMUSG00000018507	-0.492041	0.1	5.7	1.6	0.1	0.3	45.5	0.5
Acbd4	ENSRNOG00000003108	-0.79785	ENSMUSG00000056938	1.11018	3.7	6.8	5.5	1.5	1.2	2.5	4.5
Psmd12	ENSRNOG00000003117	3.64205	ENSMUSG00000020720	0.18737	18.8	20.8	22.3	20.9	11.8	13.4	22.4
Rtn4rl1	ENSRNOG00000003121	1.17141	ENSMUSG00000045287	-2.04525	0.1	1.7	2.1	0.1	0.4	38.7	0.7
Hdac8	ENSRNOG00000003122	4.19374	ENSMUSG00000067567	-0.426503	12.5	4.7	8.9	5.1	3.3	2.6	5.5
Rpa1	ENSRNOG00000003123	-0.171873	ENSMUSG00000000751	-0.742803	17.4	7.4	16.4	10.1	11.2	8.4	10.8
Rogdi	ENSRNOG00000003125	0.0601472	ENSMUSG00000022540	-0.539115	8.5	23.8	26.7	21.2	19.3	123.7	8.1
Zfp496	ENSRNOG00000003129	-4.2146	ENSMUSG00000020472	-0.834263	7.4	4.3	10.7	4.1	0.7	11.3	11.8
Traf7	ENSRNOG00000003131	-2.32902	ENSMUSG00000052752	-0.0381351	35	22.4	23.6	14.5	5.3	21.5	38.1
Mip	ENSRNOG00000003132	-0.373955	ENSMUSG00000025389	3.20343e-16	0.1	0.1	0.1	0.1	0.1	0.1	0.1
Slc4a4	ENSRNOG00000003134	1.83802	ENSMUSG00000060961	-1.95308	266.3	12.5	19.2	1.6	1.8	0.8	0.7
Fcrla	ENSRNOG00000003136	-0.0664456	ENSMUSG00000038421	-0.222392	0.1	0.1	0.1	0.1	0.1	0.2	0.1
Smc1a	ENSRNOG00000003139	1.47083	ENSMUSG00000041133	-0.228441	16.8	10.2	18.6	8.9	3.8	4.2	19.4
Sqstm1	ENSRNOG00000003147	1.22122	ENSMUSG00000015837	-0.296556	63.6	145.7	96	81.4	79.7	415.7	337.3
Timp2	ENSRNOG00000003148	2.20923	ENSMUSG00000017466	1.63555	21.2	142.2	51	61.5	31.9	106.5	2.5
Farsa	ENSRNOG00000003149	5.42589	ENSMUSG00000003808	0.35435	14.4	22.5	21.9	19.6	8.6	24	17.1
Bfar	ENSRNOG00000003151	4.1462	ENSMUSG00000022684	-0.0208874	12.6	8	13.2	5.9	2.5	6	8.5
Sdhc	ENSRNOG00000003163	0.790949	ENSMUSG00000058076	-0.321243	51.8	56.2	82.2	66.6	71.6	66.3	82.8
Serpinf1	ENSRNOG00000003172	-3.94469	ENSMUSG00000000753	-3.0852	9.4	2.5	10.8	0.5	1.4	97.5	7.7
Tapt1	ENSRNOG00000003174	1.59765	ENSMUSG00000046985	-0.303519	30.9	16.3	17.1	28	17	7.8	19.9
Mixl1	ENSRNOG00000003176	-0.931717	ENSMUSG00000026497	3.20343e-16	0.1	0.1	0.1	0.1	0.1	0.1	0.1
Mat2b	ENSRNOG00000003177	0.995384	ENSMUSG00000042032	0.055558	11.2	15	14	13.2	7.9	9.6	30.7
Mageh1	ENSRNOG00000003178	1.4067	ENSMUSG00000047238	-0.25991	35.2	24.4	72.3	32.7	9.3	0.8	25
Acbd3	ENSRNOG00000003185	0.53704	ENSMUSG00000026499	-0.161919	12.8	8.7	10	10.7	3.8	8.2	12.9
Anks3	ENSRNOG00000003186	4.08723	ENSMUSG00000022515	-0.222392	13.2	7.5	9	8.1	5.3	10.4	6.5
Armcx5	ENSRNOG00000003187	-0.0114455	ENSMUSG00000072969	1.75372	5.6	15.4	8.3	7.2	1.7	0.9	3.7
Bhlhb9	ENSRNOG00000003191	1.60448	ENSMUSG00000072964	0.925453	15	22	26.7	12.1	1	1.8	12.9
Caskin1	ENSRNOG00000003195	-0.338865	ENSMUSG00000033597	0.998062	40.5	24.8	20.6	9	2.3	1.8	0.3
RGD1305733	ENSRNOG00000003198	3.32979	ENSMUSG00000044117	1.81639	2	64.1	48.7	34.8	19	3.9	0.8
LOC100362640	ENSRNOG00000003201	-2.96412	ENSMUSG00000031320	-1.21456	20.6	40.9	68.7	49.8	50.8	192.1	187.5
Hexim1	ENSRNOG00000003203	-1.17599	ENSMUSG00000048878	0.70803	16.3	26.6	18.9	7.8	5.2	21.3	28.2
Ldb2	ENSRNOG00000003205	3.24356	ENSMUSG00000039706	1.43472	0.9	4.1	3.5	1	0.6	0.2	2.9
Actr3	ENSRNOG00000003206	-0.0711198	ENSMUSG00000026341	-0.388565	10.7	22	19.6	17.8	11.3	34.2	79.2
Fmnl1	ENSRNOG00000003207	2.92666	ENSMUSG00000055805	-1.5407	0.6	5.7	8	1	1.6	88	0.3
Pcp4l1	ENSRNOG00000003209	-0.45717	ENSMUSG00000038370	0.0166787	0.5	5.8	2.5	0.6	1.6	1.6	27.6
Srp9	ENSRNOG00000003211	1.45196	ENSMUSG00000026511	1.17304	6.1	17.4	9.7	8.4	5.7	4.8	11.6
Helz	ENSRNOG00000003213	3.16315	ENSMUSG00000020721	0.0979752	4.9	3.3	3.7	2	0.3	3.2	4.4
H3f3b	ENSRNOG00000003220	-0.342341	ENSMUSG00000016559	0.255647	347.7	276.6	187.6	160.4	104.6	282.9	306.9
H3f3b	ENSRNOG00000003220	-0.342341	ENSMUSG00000060743	0.114348	60.5	147.2	155.4	123	101.6	80.6	294.8
Degs1	ENSRNOG00000003223	3.27574	ENSMUSG00000038633	-1.65533	38.8	36.9	90	196.9	235.9	53.9	81.9
Mid1ip1	ENSRNOG00000003228	-4.2234	ENSMUSG00000008035	-0.883186	86.7	36	69.7	54.3	131	49.1	7.6
Tspan7	ENSRNOG00000003229	0.334378	ENSMUSG00000058254	-0.821147	1144.7	209.2	554.8	161.7	134.1	212.8	9.6
Slc9a3r1	ENSRNOG00000003232	-3.56655	ENSMUSG00000020733	-2.36768	103.1	6	18.1	2.9	7.6	45.2	8.9
Mgrn1	ENSRNOG00000003234	3.68635	ENSMUSG00000022517	0.205883	24.6	39.1	35.5	38.8	28.8	56.9	18.8
Mgat4b	ENSRNOG00000003235	-0.389381	ENSMUSG00000036620	1.03872	8.1	36.5	19.1	9.5	5.4	31.5	33
Tp53bp2	ENSRNOG00000003237	-2.64685	ENSMUSG00000026510	-0.365825	17.6	8.2	7.3	17.8	9.4	6.8	4.5
Cant1	ENSRNOG00000003239	-2.70665	ENSMUSG00000025575	-0.505235	13.5	12.4	17.9	18.6	13.6	33	9
Gabrg2	ENSRNOG00000003241	1.2481	ENSMUSG00000020436	4.79141	0.1	24	3.7	0.5	0.5	0.2	0.2
Wdr81	ENSRNOG00000003243	-2.49893	ENSMUSG00000045374	-2.00782	5.3	2.3	4.7	4.4	2.9	37	1.2
Mpzl1	ENSRNOG00000003248	-1.09184	ENSMUSG00000026566	-2.37498	28.2	28.3	90.9	322.4	54.6	2.7	382
B3galt2	ENSRNOG00000003251	4.1781	ENSMUSG00000033849	2.7318	4.4	9.3	2.4	1	0.3	0.1	0.2
Qdpr	ENSRNOG00000003253	-1.00509	ENSMUSG00000015806	-2.30581	16.6	28.8	31.6	232.7	509.1	31.2	33.2
Ccng1	ENSRNOG00000003256	0.151686	ENSMUSG00000020326	-0.63743	7.9	6	9.5	15.2	11.5	4.2	7.7
Cdc73	ENSRNOG00000003258	2.0143	ENSMUSG00000026361	-0.280108	12.8	6.3	9	6.7	2.2	2.4	12.8
Nr1i3	ENSRNOG00000003260	3.57997	ENSMUSG00000005677	3.20343e-16	0.1	0.1	0.1	0.1	0.1	0.1	0.1
Usp9x	ENSRNOG00000003261	-0.0078866	ENSMUSG00000031010	1.60728	12.2	22.8	9	7.6	2.7	2.5	10.9
Cacng4	ENSRNOG00000003262	1.69628	ENSMUSG00000020723	-1.01951	14.7	30.6	275.8	79.4	1.5	0.6	0.2
Nat9	ENSRNOG00000003264	1.11176	ENSMUSG00000015542	-1.20997	1.2	2.5	3.2	4.7	6	13.1	6.5
Pycr2	ENSRNOG00000003267	2.47528	ENSMUSG00000026520	-1.71693	9	5.8	16.1	21.2	29.7	28.5	9.9
Maml1	ENSRNOG00000003268	3.36876	ENSMUSG00000050567	-0.446516	3.6	3.4	3.5	4	1.8	6.9	8
Atp6v0e1	ENSRNOG00000003269	-2.80305	ENSMUSG00000015575	-2.59708	38	13.5	96.6	67	27.8	140.5	120.2
Syce2	ENSRNOG00000003279	4.32757	ENSMUSG00000003824	0.546827	1.3	2.8	5.3	0.9	0.2	2.7	1.1
Mcm9	ENSRNOG00000003281	1.29644	ENSMUSG00000058298	-0.95109	4.2	1	2.6	1.7	0.7	0.6	1.8
Rcsd1	ENSRNOG00000003283	-8.38744	ENSMUSG00000040723	-7.21189	0.3	0.2	4.7	0.2	0.4	155.8	16.5
Lap3	ENSRNOG00000003289	-2.7089	ENSMUSG00000039682	-2.41715	41.3	6.4	20.7	48.6	45.6	36.7	12.2
Creg1	ENSRNOG00000003291	-3.98634	ENSMUSG00000040713	-1.87553	12.3	6.2	19.2	7.5	3.2	77.7	16.6
Cd247	ENSRNOG00000003298	1.11611	ENSMUSG00000005763	0.621263	12.5738	6.3	5.3	2.4	0.2	1.7	2.4
Btg2	ENSRNOG00000003300	-2.16248	ENSMUSG00000020423	-1.80012	112.7	33.3	21	1.1	2.2	364.7	194.1
Flcn	ENSRNOG00000003302	-1.67088	ENSMUSG00000032633	-0.995456	21.3	15.9	18.6	26.2	11.8	99.5	12.8
Gcdh	ENSRNOG00000003307	4.66572	ENSMUSG00000003809	-0.118473	12.4	7.4	10.6	10.1	7.5	5.1	2.5
LOC100910121	ENSRNOG00000003326	-2.11796	ENSMUSG00000022682	0.429251	10.2	13.6	13.1	12.5	8.2	6.2	10.4
Ppm1d	ENSRNOG00000003329	2.37607	ENSMUSG00000020525	1.59461	6.3	15	8.3	5.8	2.2	2.6	4.6
Acsf2	ENSRNOG00000003330	-1.36514	ENSMUSG00000076435	-1.77259	8.7	0.6	0.6	0.1	0.3	1.2	1.4
Nt5m	ENSRNOG00000003332	-2.07902	ENSMUSG00000032615	0.329821	11.9	16.8	16.5	14	15	11.2	11.6
Klhl21	ENSRNOG00000003334	2.26184	ENSMUSG00000073700	0.294285	3	5.6	4.2	4.7	2	10.6	2.9
Mybph	ENSRNOG00000003336	0.748206	ENSMUSG00000042451	-0.874469	0.1	0.1	0.1	0.1	0.1	0.6	0.1
Pmp22	ENSRNOG00000003338	-5.82427	ENSMUSG00000018217	-5.1219	48.4	2.8	53.5	6.9	9.4	421.3	45.5
Canx	ENSRNOG00000003343	-0.834729	ENSMUSG00000020368	-0.593923	129.3	64.2	136.1	129.2	54.2	53.1	79.5
Fancb	ENSRNOG00000003346	3.43915	ENSMUSG00000047757	-0.0339473	0.9	0.7	1.4	1	0.3	0.3	0.4
Rasd1	ENSRNOG00000003348	5.70233	ENSMUSG00000049892	-0.786293	2.3	4.6	3.7	0.1	0.1	1.8	39.6
Mospd2	ENSRNOG00000003350	-1.47826	ENSMUSG00000061778	-0.912708	10.4	4.4	6.1	10.3	6.8	2.2	13.9
Ogt	ENSRNOG00000003359	1.94681	ENSMUSG00000034160	0.953473	60.9	47.8	39.5	21	5.3	5.9	15.5
Cadm3	ENSRNOG00000003365	6.36345	ENSMUSG00000005338	2.8035	5.4	106	34.1	39.4	10	1.8	0.4
Ccdc85a	ENSRNOG00000003374	-0.903761	ENSMUSG00000032878	1.04891	3.7	8	2.1	0.3	0.4	0.1	16.6
Glrx2	ENSRNOG00000003385	-2.92862	ENSMUSG00000018196	0.759358	6.7	10.1	8	7.7	5.6	1.6	6.2
Rbfox3	ENSRNOG00000003386	2.23243	ENSMUSG00000025576	3.64981	0.3	18.2	2.7	0.4	2.3	2.5	0.5
Grsf1	ENSRNOG00000003392	6.93654	ENSMUSG00000044221	1.1394	14	30.4	15.9	15.2	5.7	11.1	20.9
Tomm40l	ENSRNOG00000003398	5.72078	ENSMUSG00000005674	-0.282677	6.3	7.7	12.2	7.9	9.6	7.9	12.3
Hnrnph1	ENSRNOG00000003399	-1.8662	ENSMUSG00000007850	0.990329	121.1	123.9	103.4	62	8.3	22.9	56.5
Stx6	ENSRNOG00000003402	3.79494	ENSMUSG00000026470	-1.27854	8.9	14.4	25.1	26.5	57.2	41.5	50.4
Slc35f5	ENSRNOG00000003403	2.26184	ENSMUSG00000026342	-0.0780025	14.1	12.3	14.8	11.3	4.5	7	26.2
Elac2	ENSRNOG00000003424	-2.44083	ENSMUSG00000020549	-0.288376	6.9	5.8	10.2	8.5	5.6	6.8	4.5
Rufy3	ENSRNOG00000003428	1.26044	ENSMUSG00000029291	2.18527	7.4	52	26.4	18.8	11	2.2	2.8
Trove2	ENSRNOG00000003434	-2.33366	ENSMUSG00000018199	0.674759	6.3	8.7	7.5	5.5	1.9	0.3	11.2
Adora1	ENSRNOG00000003442	1.07703	ENSMUSG00000042429	-1.35189	10.5	5.4	41.9	10.2	17.1	2.8	0.2
Lypd1	ENSRNOG00000003453	5.23533	ENSMUSG00000026344	0.455171	1.5	16.2	41.7	8.7	6	2.1	10.9
Zfp330	ENSRNOG00000003461	3.99398	ENSMUSG00000031711	0.204539	10.2	8.7	8.2	7.3	3.6	6.1	9.9
MAST1	ENSRNOG00000003469	0.709401	ENSMUSG00000053693	3.66868	0.6	33.7	8.4	2.2	1.2	3.3	0.2
Fundc1	ENSRNOG00000003470	-0.575158	ENSMUSG00000025040	0.113054	9.8	15.7	26.3	18.4	10	9.9	12.7
Prkca	ENSRNOG00000003491	2.6429	ENSMUSG00000050965	0.710493	1.6	4.2	5.6	4.1	1.9	2	0.2
Ppfia4	ENSRNOG00000003494	3.94217	ENSMUSG00000026458	4.32437	0.4	19.7	1.9	0.5	0.9	2.1	0.1
Prpf8	ENSRNOG00000003495	2.89722	ENSMUSG00000020850	0.131006	23.4	24	33.6	22.8	9.5	21.3	20.9
Tbc1d9	ENSRNOG00000003496	2.39404	ENSMUSG00000031709	1.81493	2.4	20.7	7.8	2.2	0.6	19.1	3.2
Rnaseh2a	ENSRNOG00000003504	-2.95045	ENSMUSG00000052926	-0.0312961	2.4	3.8	5.9	3.2	3.3	4.6	3.9
Gosr2	ENSRNOG00000003506	2.95867	ENSMUSG00000020946	-0.772753	18.3	21.5	39.2	39.7	30	57.8	35.4
Ergic1	ENSRNOG00000003508	4.06171	ENSMUSG00000001576	0.652632	22.6	37.1	42.6	17.4	5.7	39.3	14
Gabra1	ENSRNOG00000003512	1.24803	ENSMUSG00000010803	2.72514	0.1	5.4	3.6	0.4	0.5	0.1	0.2
Prdx2	ENSRNOG00000003520	0.600488	ENSMUSG00000005161	0.389653	54.3	147.1	159.4	148	94.4	48.9	168.7
Lrrc59	ENSRNOG00000003524	4.66621	ENSMUSG00000020869	0.0751992	21.9	33.8	32.7	28.7	13.1	45.8	50.3
Rufy1	ENSRNOG00000003536	4.59694	ENSMUSG00000020375	-1.10274	6.1	3.5	10.7	7.4	5.8	9.5	5.6
Adamts4	ENSRNOG00000003538	-0.396105	ENSMUSG00000006403	-4.88708	0.5	1.1	1.5	127.6	61.4	0.4	3.9
Pggt1b	ENSRNOG00000003541	-1.74912	ENSMUSG00000024477	-0.476814	9.8	4	5.7	3.7	1.2	1.8	11.2
Hcfc1r1	ENSRNOG00000003542	3.15331	ENSMUSG00000023904	0.61078	12	29.6	15.7	19.7	26.1	22	20.8
Uchl5	ENSRNOG00000003545	-1.7175	ENSMUSG00000018189	0.564785	4.4	7.1	5.7	3.7	2.2	3.4	9.4
Cnpy2	ENSRNOG00000003549	-4.21477	ENSMUSG00000025381	-0.867497	13.4	13.2	32.8	25	13.7	25.2	34.4
Acbd6	ENSRNOG00000003550	1.52238	ENSMUSG00000033701	0.284077	8.7	22.1	22.3	20	14.5	21.1	22.3
B4galt3	ENSRNOG00000003551	0.251884	ENSMUSG00000052423	0.389758	12.9	17.6	19.6	13.7	4.1	23.9	6.4
Efemp1	ENSRNOG00000003553	-0.70639	ENSMUSG00000020467	-0.874469	0.4	0.2	1.1	0.2	0.1	0.1	0.3
Ccdc112	ENSRNOG00000003559	1.01884	ENSMUSG00000071855	1.96829	1.2	3	2	0.7	0.4	0.1	0.2
Susd4	ENSRNOG00000003562	2.15443	ENSMUSG00000038576	-0.754718	2	10.5	43.6	53.6	5	1.3	0.8
Blmh	ENSRNOG00000003563	3.8565	ENSMUSG00000020840	0.107617	13.3	21.1	25	22.7	18.1	13.9	24.5
Ints2	ENSRNOG00000003576	-1.10519	ENSMUSG00000018068	-0.15978	8.8	3.7	5.8	5.8	0.9	0.4	3.1
Fem1c	ENSRNOG00000003578	1.03215	ENSMUSG00000033319	0.197322	9.9	10.3	10.2	4.8	2	4.4	22.6
Pou2f1	ENSRNOG00000003581	2.85571	ENSMUSG00000026565	0.534336	8.7	4.2	3.4	1.7	0.4	1.6	1.6
Smyd2	ENSRNOG00000003583	4.92374	ENSMUSG00000026603	0.114333	8.4	21	31	19.1	12.9	5.3	39.7
Med28	ENSRNOG00000003592	-0.296272	ENSMUSG00000015804	-0.387381	4.1	7.9	10.9	10.1	7.9	15	14
Tmem183a	ENSRNOG00000003594	-0.0403816	ENSMUSG00000042305	0.584963	18	22.8	18.4	15	9.8	9.2	20.8
Tuba4a	ENSRNOG00000003597	0.876303	ENSMUSG00000026202	0.434403	13.4	22.5	12.9	2.9	10.6	57	3.1
Pnpt1	ENSRNOG00000003600	-5.07589	ENSMUSG00000020464	0.345135	13.2	9.4	10.5	7.6	2.8	0.9	9.4
Arhgap44	ENSRNOG00000003603	1.81935	ENSMUSG00000033389	3.07354	2.4	27.5	8.3	3.8	2.4	1.8	0.9
Dynlt3	ENSRNOG00000003611	3.55065	ENSMUSG00000031176	-0.418919	20.8	23.2	29.2	41.7	20.6	6.8	67
Grem2	ENSRNOG00000003616	-0.998769	ENSMUSG00000050069	7.01959	0.1	17.3	0.3	0.1	0.1	0.1	0.1
Cybb	ENSRNOG00000003622	0.142066	ENSMUSG00000015340	-2.62449	0.1	0.1	0.4	0.1	0.1	2.9	0.1
Ubxn4	ENSRNOG00000003625	6.46885	ENSMUSG00000026353	0.0530903	18.4	14.3	17.3	11.6	5.4	9.8	20.2
Atp5h	ENSRNOG00000003626	0.786008	ENSMUSG00000034566	-0.516757	4.7	7.7	9.7	10.6	12	8.2	20.9
Nvl	ENSRNOG00000003629	-1.04831	ENSMUSG00000026516	0.127112	18.5	8.3	9.4	9.2	3.1	2.1	3.3
Zfp354a	ENSRNOG00000003634	2.40013	ENSMUSG00000020364	0.0303736	1.5	0.8	1.2	0.5	0.2	0.1	1.2
Hnrnpab	ENSRNOG00000003645	-2.4781	ENSMUSG00000020358	0.359564	32.4	85.6	73.1	77.7	35.9	87.2	94
Fh	ENSRNOG00000003653	3.12167	ENSMUSG00000026526	-0.415037	23.4	17.5	35.8	21.8	12.8	13.4	32.8
Nup85	ENSRNOG00000003673	6.29005	ENSMUSG00000020739	0.182864	10.2	11.9	17.9	10.7	4.8	6.4	12.9
Ptchd1	ENSRNOG00000003675	2.26475	ENSMUSG00000041552	2.58496	0.1	0.9	0.3	0.1	0.1	0.2	0.1
Med13	ENSRNOG00000003679	1.42162	ENSMUSG00000034297	0.526664	11.5	9.7	9	7.5	1.6	3	7.8
Hook2	ENSRNOG00000003682	-3.88774	ENSMUSG00000052566	2.29373	2.8	7.6	3.1	1.1	0.2	1.7	0.4
Tbl1x	ENSRNOG00000003686	0.526768	ENSMUSG00000025246	0.511933	16.9	13	10.4	4.2	1.9	9.5	11.8
Rgs2	ENSRNOG00000003687	-1.79429	ENSMUSG00000026360	-0.731406	18.6	15.6	18.1	1.6	1.1	99.9	16.1
Nono	ENSRNOG00000003689	-2.21479	ENSMUSG00000031311	0.0918796	24.1	44.3	64.6	46.5	20.6	34.3	59.3
Tmed7	ENSRNOG00000003691	-1.34496	ENSMUSG00000033184	-0.510013	53.3	33.8	68.6	67.6	33	20.4	45.9
Fam184b	ENSRNOG00000003704	-0.660714	ENSMUSG00000015879	2.68012	2.5	4.7	1.1	0.5	0.1	0.1	0.1
Ufc1	ENSRNOG00000003706	1.65222	ENSMUSG00000062963	0.0253532	17.2	35.4	38.9	39.1	34.6	30.7	48.2
Zmym3	ENSRNOG00000003707	-0.524379	ENSMUSG00000031310	1.81266	17.4	36.3	14.4	9.3	6.5	9.1	5.3
Clk4	ENSRNOG00000003714	3.35357	ENSMUSG00000020385	-0.265894	57.9	22.4	31.6	27.7	10.8	9.5	24.1
Cnih4	ENSRNOG00000003717	-5.51797	ENSMUSG00000062169	-1.36034	5.7	4.2	12.5	12.7	13.2	9	11.6
Atpaf2	ENSRNOG00000003719	1.14972	ENSMUSG00000042709	-0.128391	9.1	7.7	9.7	7.5	4.1	7	13.1
Wdr26	ENSRNOG00000003723	2.89812	ENSMUSG00000038733	0.174498	24.1	23.7	19.8	17.8	9.3	23.7	31.3
Mrpl27	ENSRNOG00000003724	-1.05079	ENSMUSG00000024414	-0.0267173	7.1	10.7	12.1	11.3	9.7	5.7	19.5
Xylt2	ENSRNOG00000003728	-3.67816	ENSMUSG00000020868	-0.439285	8.9	5.9	13.5	6.1	3.2	6.9	9.4
Nptx1	ENSRNOG00000003741	1.89079	ENSMUSG00000025582	2.79553	3.7	24.3	7.4	6.2	3.1	0.5	0.1
Cdkl5	ENSRNOG00000003742	3.84454	ENSMUSG00000031292	1.74543	0.6	3.8	3.1	1.2	0.7	0.1	1.1
Dars	ENSRNOG00000003743	1.67397	ENSMUSG00000026356	-0.568938	26.7	17.1	32.6	36.4	23.1	7	26.4
Atf3	ENSRNOG00000003745	-4.43564	ENSMUSG00000026628	-4.68205	151.9	12.7	61.9	7.1	9	1217.3	508.9
Asna1	ENSRNOG00000003747	-1.24648	ENSMUSG00000052456	-0.549211	22.8	34.5	51.7	61.4	48.2	67.3	51.5
Xk	ENSRNOG00000003749	2.01976	ENSMUSG00000015342	0.92785	1.3	1.3	1.4	0.7	0.3	0.1	0.3
Smarca1	ENSRNOG00000003762	-2.87986	ENSMUSG00000031099	2.19689	1.5	8.1	7.3	1.4	0.1	0.1	0.2
Prdx4	ENSRNOG00000003763	-7.93316	ENSMUSG00000025289	-1.27394	17.9	10.8	33.8	13.4	13.5	24.3	53.8
Rps6kc1	ENSRNOG00000003767	1.70158	ENSMUSG00000089872	-0.0112273	5.1	6.4	8.9	7.1	5.6	8.4	3.6
Tmem163	ENSRNOG00000003769	3.25703	ENSMUSG00000026347	0.127917	0.3	77	47.5	277.4	96.6	0.5	0.5
Csrp2	ENSRNOG00000003772	-6.48802	ENSMUSG00000020186	-2.74979	3.5	12.6	5.8	0.8	0.7	1.8	495.9
Hmox2	ENSRNOG00000003773	4.25987	ENSMUSG00000004070	-0.894745	8.3	16.7	24.6	26	65.9	42.5	19
Dedd	ENSRNOG00000003779	1.55535	ENSMUSG00000013973	-0.18353	8.8	8.6	10.9	8.4	8.2	12.3	10
Atp10b	ENSRNOG00000003781	2.47528	ENSMUSG00000055415	-3.98489	0.1	0.1	0.5	5.8	2.9	0.1	0.1
Acot9	ENSRNOG00000003782	3.46372	ENSMUSG00000047565	-0.255559	2.1	4.3	2.5	1	1.1	3	21.1
Acot9	ENSRNOG00000003782	3.46372	ENSMUSG00000025287	-0.406817	1.3	2.2	1.2	0.5	0.6	1.2	12.7
Tspan6	ENSRNOG00000003786	2.09696	ENSMUSG00000067377	-0.652697	27.9	28.2	84.2	55.6	13.4	0.3	84.6
Nmral1	ENSRNOG00000003794	0.853014	ENSMUSG00000063445	-1.32855	2	5.8	13.5	12.7	46.9	10.2	2.1
Angel2	ENSRNOG00000003795	2.69531	ENSMUSG00000026634	0.0319901	13.9	11.4	13	11.1	6.8	6.3	15.8
Mrps7	ENSRNOG00000003797	5.26286	ENSMUSG00000046756	-1.09169	9	12.7	49.1	46	25.1	16.3	16.9
Wnt9b	ENSRNOG00000003807	-2.31655	ENSMUSG00000018486	3.20343e-16	0.1	0.1	0.1	0.1	0.1	0.1	0.1
Sat1	ENSRNOG00000003809	-3.01931	ENSMUSG00000025283	-4.01662	159.8	9.8	40.9	19.4	17.3	459.1	255.2
Nlgn3	ENSRNOG00000003812	1.32955	ENSMUSG00000031302	-0.364864	16.9	12.8	49.8	25	6.7	0.3	0.2
Slc25a11	ENSRNOG00000003815	1.89214	ENSMUSG00000014606	0.167797	19.8	38.1	31.8	36.8	29	55.6	30.5
Tada1	ENSRNOG00000003816	0.76082	ENSMUSG00000026563	-0.107959	10.2	14.8	18.2	22.6	13.5	12.6	18.6
Rptor	ENSRNOG00000003821	1.46106	ENSMUSG00000025583	-0.573127	6.2	6.8	7.8	4.9	3.2	35.1	3.5
Slu7	ENSRNOG00000003822	-0.377765	ENSMUSG00000020409	-0.385222	7.5	5.5	9	9.1	5.6	2.7	9.2
Wdr75	ENSRNOG00000003825	2.85871	ENSMUSG00000025995	-0.149514	11	5.8	8	6.9	2.4	2.5	7.8
Nenf	ENSRNOG00000003833	-3.17169	ENSMUSG00000037499	0.193232	10.3	35.1	43.3	34.2	34.9	20.6	40.9
Map2k4	ENSRNOG00000003834	0.300924	ENSMUSG00000033352	0.901936	10	21.8	16.1	12.7	9.2	6	16
Slc43a2	ENSRNOG00000003835	2.87771	ENSMUSG00000038178	-1.68557	3	4	9.5	9.9	10.3	28.9	15.6
Slit2	ENSRNOG00000003840	-3.61851	ENSMUSG00000031558	0.17897	0.4	1	1.2	1.6	0.7	0.1	1.3
Kcnh1	ENSRNOG00000003841	5.36703	ENSMUSG00000058248	3.82597	0.1	2.6	0.4	0.1	0.2	0.2	0.1
Dhx15	ENSRNOG00000003844	1.12256	ENSMUSG00000029169	0.0839261	41.7	34.8	39.3	33.8	8.5	14.7	59
Pitpna	ENSRNOG00000003846	4.27772	ENSMUSG00000017781	0.471765	15.7	53.6	33.6	29.8	28.4	43.5	80.9
Med12	ENSRNOG00000003848	-1.47991	ENSMUSG00000079487	0.0520222	18	8	8.5	6.8	2.3	5.6	5.1
Stx8	ENSRNOG00000003849	-0.205347	ENSMUSG00000020903	-0.80408	1.9	2.1	4.1	3	2.9	4.3	5.8
Scoc	ENSRNOG00000003853	2.2839	ENSMUSG00000063253	1.21549	5	19.7	7.6	7.3	5.2	9.3	16.5
Dnaja3	ENSRNOG00000003855	1.01439	ENSMUSG00000004069	0.0813883	8.4	7.9	10.8	5.4	6.3	6.8	7.1
Atp6ap2	ENSRNOG00000003858	2.32388	ENSMUSG00000031007	0.865453	48.2	74	44.9	32.3	30.2	52	36.1
Gorab	ENSRNOG00000003861	-3.70132	ENSMUSG00000040124	-0.0565835	4.5	2.5	4.8	2.6	1.2	0.4	2.1
Gipc1	ENSRNOG00000003864	0.994442	ENSMUSG00000019433	-1.56772	13.2	17.3	22.6	129.2	74.9	37.9	29.9
Tmigd1	ENSRNOG00000003865	-0.592982	ENSMUSG00000020839	-1	0.1	0.1	0.1	0.1	0.1	0.1	0.7
LOC100911874	ENSRNOG00000003872	-6.03971	ENSMUSG00000025993	-5.71195	1.3	0.6	4.1	0.3	0.3	31.8	150.9
Cpd	ENSRNOG00000003873	1.50505	ENSMUSG00000020841	-1.41504	9.4	6.1	12.1	17.9	17.7	7.8	32.7
Ocrl	ENSRNOG00000003875	-0.0262319	ENSMUSG00000001173	1.28063	15.3	13.2	7	3.6	1.1	1	4.6
Rnf167	ENSRNOG00000003879	1.08973	ENSMUSG00000040746	-0.628999	20.5	19	28.1	23.8	26.5	57.7	19.7
Nit1	ENSRNOG00000003881	2.95467	ENSMUSG00000013997	-0.190331	10.1	10.4	15.7	14.8	12.3	9.3	9
Lgi2	ENSRNOG00000003887	1.19329	ENSMUSG00000039252	2.85148	0.2	8.3	4.2	1	0.3	1.1	0.1
Tbc1d15	ENSRNOG00000003889	-1.23782	ENSMUSG00000020130	-0.774035	10.7	7.3	10.5	12.7	6.3	14.2	20.5
Nap1l1	ENSRNOG00000003890	2.62221	ENSMUSG00000058799	0.285754	12.5	19.2	27.8	20	7.8	4.4	22
Nsf	ENSRNOG00000003905	4.50163	ENSMUSG00000034187	1.98712	6.2	40.9	22	7.2	5.1	9.2	12.2
Tmem206	ENSRNOG00000003915	3.19781	ENSMUSG00000026627	-2.05517	7	3.1	9	4.7	2.6	45.8	8.2
Uck2	ENSRNOG00000003917	-3.50566	ENSMUSG00000026558	-0.03827	4.1	9.3	9.7	13.6	13.6	4.8	11.5
Rps6kb1	ENSRNOG00000003919	4.4378	ENSMUSG00000020516	0.418526	10.9	9.2	10.2	7.5	2.2	1.6	8.9
Rab21	ENSRNOG00000003923	0.829865	ENSMUSG00000020132	0.194625	18.8	24.3	23.6	29.7	27.1	11.9	16.3
Tmco1	ENSRNOG00000003928	-5.0256	ENSMUSG00000052428	-1.05195	7.5	5	11.2	9.3	7.5	8.4	18.3
Pcdh19	ENSRNOG00000003929	3.3713	ENSMUSG00000051323	0.425091	2.9	3.2	2.3	2	0.6	0.1	6.4
Arsg	ENSRNOG00000003931	-6.77752	ENSMUSG00000020604	-1.86227	2.3	2.7	3.3	12.3	35.4	3.3	2.3
Pwwp2a	ENSRNOG00000003936	-2.16398	ENSMUSG00000044950	0.422455	6.4	6.5	6.8	4.2	1.3	5.5	4.9
Asnsd1	ENSRNOG00000003942	0.99258	ENSMUSG00000026095	-0.45831	5.6	7.8	13.3	11.4	9.4	5.2	19.4
Llgl1	ENSRNOG00000003948	-1.73329	ENSMUSG00000020536	-2.25105	26.7	8.9	28.5	90.6	81.3	11.5	15.6
Psmc1	ENSRNOG00000003951	-2.83853	ENSMUSG00000021178	0.252119	13.3	23.7	23.3	22.5	18.1	13.2	29
Spata7	ENSRNOG00000003955	6.56964	ENSMUSG00000021007	1.43149	3.1	4.9	3	1.4	0.8	0.3	2.3
Commd10	ENSRNOG00000003958	5.06375	ENSMUSG00000042705	-0.315042	9.1	11.2	15.9	13.1	9.7	13.7	22.1
Nsmce2	ENSRNOG00000003964	1.609	ENSMUSG00000059586	0.089907	5.8	8	11	8.2	6.1	4.5	9.5
Vmp1	ENSRNOG00000003967	1.85197	ENSMUSG00000018171	-1.54349	20.3	14.9	25	54.8	95.8	24.4	40.3
Tnpo2	ENSRNOG00000003970	-0.898076	ENSMUSG00000031691	1.43649	13.5	42.9	18.5	18.3	12.3	21.6	10.9
Gosr1	ENSRNOG00000003971	1.54341	ENSMUSG00000010392	0.148702	8.6	9.7	10.6	10.9	9.1	4.3	9
Cyb5r1	ENSRNOG00000003973	-2.18764	ENSMUSG00000026456	0.891538	5.5	11.1	5.1	3	3.9	4.6	13.8
Pfn1	ENSRNOG00000003975	1.81467	ENSMUSG00000018293	-1.93662	76.9	82.6	163.6	216.9	203.5	766.5	469.8
Dusp1	ENSRNOG00000003977	-0.325216	ENSMUSG00000024190	-1.45659	425.5	149.3	66	11.8	13.1	1234.2	708
Zranb3	ENSRNOG00000003979	-1.03646	ENSMUSG00000036086	-0.415037	2.1	0.7	1.1	0.7	0.4	0.2	1.1
Ttc1	ENSRNOG00000003980	1.16012	ENSMUSG00000041278	-0.370491	10.9	11.1	14.2	17.9	16.3	13.7	13.1
Pfdn2	ENSRNOG00000003983	1.73579	ENSMUSG00000006412	0.468913	19.6	38.8	40.4	35.6	27.3	26	19.3
Tmem19	ENSRNOG00000003985	5.44088	ENSMUSG00000069520	-0.0344335	15.5	13.8	13.5	23.3	21.3	5.9	5.3
Dnajc27	ENSRNOG00000003988	4.48999	ENSMUSG00000020657	2.21387	8.4	22.5	5.9	4.1	3.3	4.6	2.8
Grb2	ENSRNOG00000003990	4.15869	ENSMUSG00000059923	0.451479	11.5	49	27.3	29.6	30.4	86.5	29.7
Pld5	ENSRNOG00000003997	2.5145	ENSMUSG00000055214	2.07039	0.1	0.7	0.5	0.1	0.1	0.1	0.1
Adcy3	ENSRNOG00000003999	2.75119	ENSMUSG00000020654	0.384265	6.2	6.7	17.4	3.8	0.4	2	1
Osgepl1	ENSRNOG00000004001	4.13234	ENSMUSG00000026096	-0.935294	4.7	1.9	6.3	2.5	1.7	0.6	6
Dusp10	ENSRNOG00000004003	-6.22303	ENSMUSG00000039384	-0.332844	20.9	7.9	9.1	11.3	13.8	0.9	3.7
Dnajb9	ENSRNOG00000004006	-3.5862	ENSMUSG00000014905	-0.852747	72.4	29.2	36.3	27.3	16.7	43.8	119.9
Chmp6	ENSRNOG00000004014	-0.452719	ENSMUSG00000025371	-0.669979	8.1	10.8	17.1	9.7	6.2	31.1	30.9
Msl3	ENSRNOG00000004016	-2.88872	ENSMUSG00000031358	-0.5281	9.3	6.9	13.5	10.2	7.5	6.8	12.4
Phlda1	ENSRNOG00000004019	1.9803	ENSMUSG00000020205	-2.04156	10.5	6.7	48.8	26.6	16.1	17.1	46.4
Atp2b1	ENSRNOG00000004026	2.65066	ENSMUSG00000019943	1.59065	12.8	25.4	13.3	7	3	5.2	9.3
Aldh9a1	ENSRNOG00000004027	-1.64717	ENSMUSG00000026687	-1.7846	32.7	7	15.7	17.9	24.6	18.6	35.2
Sema6a	ENSRNOG00000004033	2.29379	ENSMUSG00000019647	-0.978492	28.3	10.7	12.6	49.4	19.1	0.2	16.9
Snx12	ENSRNOG00000004036	4.09857	ENSMUSG00000046032	0.195551	12.2	21.3	19.7	22.3	14.7	24.8	17.9
Lrrk2	ENSRNOG00000004048	5.98501	ENSMUSG00000036273	-0.768674	6.4	0.9	1	0.2	0.1	0.1	1.4
Baiap2	ENSRNOG00000004049	4.39562	ENSMUSG00000025372	1.06373	5.2	37.8	13.2	13.8	5.1	23	48.2
Ccdc88a	ENSRNOG00000004057	0.579082	ENSMUSG00000032740	0.381748	25.6	11.9	15.7	5.5	1.3	0.3	6.4
Calm1	ENSRNOG00000004060	0.431296	ENSMUSG00000019370	1.26663	35.5	305.6	126.7	117.9	315.9	87.5	78.6
Pnn	ENSRNOG00000004061	0.612906	ENSMUSG00000020994	0.509472	45.8	24.2	26.4	14.4	1.9	1.9	11.6
Nrcam	ENSRNOG00000004067	0.635482	ENSMUSG00000020598	-0.68001	56.3	12.4	37.3	22.7	1.3	0.6	1
Ncoa1	ENSRNOG00000004068	0.327394	ENSMUSG00000020647	1.26632	14.9	17.6	12.5	5.6	1.2	1.2	8.5
Kcnc2	ENSRNOG00000004077	5.10031	ENSMUSG00000035681	5.31879	0.3	15.3	1.1	0.2	0.2	0.4	0.1
Zc3h14	ENSRNOG00000004083	3.72298	ENSMUSG00000021012	0.440847	18.4	18.8	21.1	11	5.4	5.2	22
Fam84a	ENSRNOG00000004084	3.53709	ENSMUSG00000020607	1.73252	10.7	7.2	1.3	0.3	0.3	0.2	0.2
Enpp2	ENSRNOG00000004089	0.984381	ENSMUSG00000022425	-5.16806	3	6.8	146.5	599.6	638.8	1	78
AABR07016056.1	ENSRNOG00000004090	2.63904	ENSMUSG00000109324	0.47405	16.8	56	52.9	51.3	19.6	55.2	46.1
Cwc25	ENSRNOG00000004091	0.765755	ENSMUSG00000018541	0.933432	11.1	12	6.2	5.9	3.1	5.9	5.5
Rhot1	ENSRNOG00000004093	-0.0629481	ENSMUSG00000017686	-0.177174	17.3	12.5	14.8	16.2	9.4	7.1	20
Ptger1	ENSRNOG00000004094	-1.74912	ENSMUSG00000019464	-0.780388	4.5	7.2	5.8	8.8	4.1	32.9	18.1
R3hdm1	ENSRNOG00000004099	2.31079	ENSMUSG00000056211	0.719892	18.4	18.2	16.8	15.7	6.2	3.2	6
Trappc6b	ENSRNOG00000004103	5.28345	ENSMUSG00000020993	1.67977	11	28.3	10.9	6.3	4.3	4.8	15.7
Rpl23	ENSRNOG00000004107	-1.08326	ENSMUSG00000071415	-0.372809	0.7	2.6	2.6	1.9	1.8	2.8	10.4
Zfpm2	ENSRNOG00000004109	3.29135	ENSMUSG00000022306	-1.14543	6	1.1	6.2	1.9	0.3	0.1	0.1
Trib2	ENSRNOG00000004110	4.72158	ENSMUSG00000020601	-0.963017	77.3	13.5	38	16.3	1.1	0.6	24.6
Kcnv1	ENSRNOG00000004117	4.78609	ENSMUSG00000022342	1.93289	0.1	0.7	0.5	0.1	0.2	0.1	0.1
Frmpd4	ENSRNOG00000004118	-2.52176	ENSMUSG00000049176	3.41504	0.1	1.6	0.4	0.1	0.1	0.1	0.1
AABR07021840.1	ENSRNOG00000004127	2.66521	ENSMUSG00000057335	1.53724	9	22.3	11.9	10.3	3.7	3.3	7.9
Anapc4	ENSRNOG00000004130	0.420525	ENSMUSG00000029176	0.707645	18.9	18.4	12.6	11	6.4	3.7	15
Pkn1	ENSRNOG00000004131	3.03983	ENSMUSG00000057672	-1.06736	10.3	13.6	18.1	12.9	10.7	92.7	26.3
Lasp1	ENSRNOG00000004132	-0.966874	ENSMUSG00000038366	-0.401491	32.2	32.1	50.4	11.9	6.6	132.1	21.2
Slc7a3	ENSRNOG00000004133	0.890085	ENSMUSG00000031297	-0.628225	2.2	7.3	33.6	6.7	0.1	0.1	25
RGD1311745	ENSRNOG00000004135	0.18681	ENSMUSG00000032551	0.0614005	1.7	2	2.6	1.3	1.3	0.8	3.8
Ndel1	ENSRNOG00000004139	2.56649	ENSMUSG00000018736	0.5589	23.7	38.4	16.9	13.7	6.9	57.8	37.4
Vasn	ENSRNOG00000004141	-0.280236	ENSMUSG00000039646	0.685029	5.8	9.7	3.2	3.8	1.4	15.4	6.6
Adipor1	ENSRNOG00000004143	0.00310429	ENSMUSG00000026457	-1.20822	31.9	33.6	33.9	64.7	80.4	81.3	173.6
Abca8a	ENSRNOG00000004147	-3.32482	ENSMUSG00000041828	1.45943	1	1.1	0.8	0.2	0.2	0.1	0.1
Cdk17	ENSRNOG00000004148	2.37867	ENSMUSG00000020015	-0.403409	24.7	10.9	14.5	10.1	7.2	3.6	26.4
Lrp12	ENSRNOG00000004152	1.36376	ENSMUSG00000022305	0.844722	6.7	13.2	8.3	12.9	7.9	7.3	1
Hdac9	ENSRNOG00000004158	-1.47201	ENSMUSG00000004698	0.736966	4.4	3.5	2.3	1.7	1.7	1.4	1.1
Flii	ENSRNOG00000004159	3.26737	ENSMUSG00000002812	-0.546535	9.6	9.3	11.5	6.8	6.9	28.5	18.2
Prps2	ENSRNOG00000004160	-1.48572	ENSMUSG00000025742	-0.669027	6.2	5	13.9	8.5	5.9	12.6	0.6
Mtif2	ENSRNOG00000004161	1.92417	ENSMUSG00000020459	-0.118056	7.4	4.3	7.3	4.7	1.6	1.4	5.6
Pfkfb2	ENSRNOG00000004162	-2.35312	ENSMUSG00000026409	0.907508	23.5	14.6	10	7.2	1.7	1.5	2.8
Slc35e4	ENSRNOG00000004168	2.27156	ENSMUSG00000048807	-0.82103	12.8	6.5	18.1	11.2	14.8	5.3	6.7
Fzr1	ENSRNOG00000004169	-0.0044751	ENSMUSG00000020235	0.779482	10.6	22	18.2	9.3	7.6	24.9	6.3
Pdk2	ENSRNOG00000004172	0.177719	ENSMUSG00000038967	-0.504331	17.5	13.9	16.9	36.8	33.7	7.3	6.1
Fam19a2	ENSRNOG00000004180	3.03236	ENSMUSG00000044071	1.96285	0.1	11.5	14.4	2.8	0.2	0.1	0.1
Sdccag8	ENSRNOG00000004181	5.5004	ENSMUSG00000026504	0.22456	3.1	3.7	4	3.9	2.4	3.2	2.4
Ccdc59	ENSRNOG00000004183	-5.80671	ENSMUSG00000019897	0.0328646	15.8	11.1	13.2	10.6	5.4	5.2	14.9
Mon2	ENSRNOG00000004185	1.9551	ENSMUSG00000034602	-1.36591	13.6	8.4	13.1	38.6	43.2	10	11.4
Snx13	ENSRNOG00000004186	-0.40557	ENSMUSG00000020590	-0.485427	12.1	7	12.6	11.2	4.2	3.5	15.2
Helb	ENSRNOG00000004189	0.0377013	ENSMUSG00000020228	-0.777608	2.3	0.7	1.6	0.9	0.3	0.9	1.2
Klhl12	ENSRNOG00000004193	1.84113	ENSMUSG00000026455	1.67594	4.8	9	4.2	3	2.7	0.6	1.6
Rps29	ENSRNOG00000004196	-3.885	ENSMUSG00000034892	-0.169925	0.4	0.8	0.6	1.4	0.8	0.9	1.3
Stxbp6	ENSRNOG00000004198	1.11504	ENSMUSG00000046314	-0.336182	7.1	4.7	7.9	9.5	8.9	0.1	2.1
Sybu	ENSRNOG00000004200	0.517247	ENSMUSG00000022340	0.883649	25.3	12.7	10.4	3.5	1	0.6	0.5
Rims2	ENSRNOG00000004201	1.6379	ENSMUSG00000037386	0.992505	3.2	6.4	4.4	6.6	4.9	0.1	0.1
Glrx5	ENSRNOG00000004206	-1.38331	ENSMUSG00000021102	-0.284934	12.2	31.6	41.3	46.2	34	36.3	61
Crim1	ENSRNOG00000004208	1.07512	ENSMUSG00000024074	0.436099	5	4.6	4.1	2.3	0.6	3.1	5.3
Fbxw9	ENSRNOG00000004212	2.26708	ENSMUSG00000008167	1.1343	9.9	21	11.2	6.9	7.5	5.7	16.2
Rpl26	ENSRNOG00000004214	0.214259	ENSMUSG00000060938	-1.89482	1.8	1.6	12.3	8.7	3.7	5.6	3.6
Klhl28	ENSRNOG00000004218	2.88663	ENSMUSG00000020948	0.535332	6.5	5	4.6	4	1.5	0.5	3.6
Dhps	ENSRNOG00000004219	2.15815	ENSMUSG00000060038	0.567787	6.9	16.7	10.6	12.5	12.4	15	10.2
Ebag9	ENSRNOG00000004220	2.97602	ENSMUSG00000022339	0.0734622	6.4	4.7	7.1	5.1	3	1.9	3.3
G2e3	ENSRNOG00000004232	4.25765	ENSMUSG00000035293	0.0995357	5.6	4	5.7	5.3	1.4	0.2	4.2
Mgat2	ENSRNOG00000004234	4.93108	ENSMUSG00000043998	0.350371	10.2	14.3	10.3	6.7	5	9	26.1
Mgst3	ENSRNOG00000004245	2.42207	ENSMUSG00000026688	0.668521	3.9	27.1	13.4	11	40.8	11.6	21.6
Spag7	ENSRNOG00000004246	1.83675	ENSMUSG00000018287	0.363963	15.7	22.2	18.5	19.6	11.3	15	23.4
Tlr7	ENSRNOG00000004249	1.64487	ENSMUSG00000044583	-7.05528	0.1	0.1	7.1	0.2	0.3	72	0.1
Eif3h	ENSRNOG00000004252	0.54781	ENSMUSG00000022312	-0.702378	23.8	51.5	63	48.9	47.5	92.9	226.7
Usf1	ENSRNOG00000004255	-2.2175	ENSMUSG00000026641	0.111725	10.2	20.8	27.2	22.4	22.8	22	10.9
Ctps2	ENSRNOG00000004257	-1.70282	ENSMUSG00000031360	0.933658	4.9	8.5	4.2	1.9	1.7	9.4	4.6
Dohh	ENSRNOG00000004259	0.344172	ENSMUSG00000078440	0.0931094	8.2	20	17.6	19	16.3	35.8	15.6
Dohh	ENSRNOG00000004259	0.344172	ENSMUSG00000113262	0.0931094	8.2	20	17.6	19	16.3	35.8	15.6
Ints7	ENSRNOG00000004263	0.633122	ENSMUSG00000037461	-0.176323	6.7	5	5.7	6.1	6.3	5.2	3.9
Zfp386	ENSRNOG00000004268	0.853014	ENSMUSG00000042063	-0.229482	4.8	2.9	5.2	2.4	0.9	0.4	6.7
Myt1l	ENSRNOG00000004269	3.98049	ENSMUSG00000061911	4.97323	0.1	17.8	2.1	0.6	0.3	0.2	0.1
Egfl6	ENSRNOG00000004275	-5.14764	ENSMUSG00000000402	0.206451	4.1	1	0.7	0.1	0.1	0.1	0.1
Cobl	ENSRNOG00000004281	5.01701	ENSMUSG00000020173	-0.552541	0.1	2	13.5	3.3	0.4	0.2	0.1
Arl4a	ENSRNOG00000004282	-0.700658	ENSMUSG00000047446	-1.36806	21.7	11.9	26.8	14.4	4	1.7	115.7
Camta2	ENSRNOG00000004283	4.07766	ENSMUSG00000040712	0.602713	15.2	18.4	12.8	7	8.6	24.9	4.2
Btg1	ENSRNOG00000004284	-1.65212	ENSMUSG00000036478	-0.651478	61.7	36.5	25.3	12.2	5.3	187.6	51.9
Wdr83	ENSRNOG00000004287	-3.30235	ENSMUSG00000005150	-0.203533	5.6	7.7	9	10.6	11.6	5.8	10.6
Ptrh2	ENSRNOG00000004288	-0.878838	ENSMUSG00000072582	0.139163	2.8	2.9	4	2.3	2.4	1.4	2.9
Grb10	ENSRNOG00000004290	-1.52242	ENSMUSG00000020176	-0.155069	1.1	4.7	2.2	0.2	0.2	0.3	27.4
Cltc	ENSRNOG00000004291	0.690524	ENSMUSG00000047126	-0.0108505	59.4	57.4	64.4	49.9	19.7	58.7	94.9
Gtf2a1	ENSRNOG00000004300	-1.29254	ENSMUSG00000020962	0.2978	5.8	4.2	4.2	4.5	2.3	2.2	1.5
Dcaf13	ENSRNOG00000004301	6.23501	ENSMUSG00000022300	-0.31797	12.2	7.3	10.6	8	4	6.4	13.4
Timp3	ENSRNOG00000004303	-2.03974	ENSMUSG00000020044	-2.39408	144.7	7.8	34.6	17.7	1.7	0.9	46.4
Syap1	ENSRNOG00000004304	-0.254341	ENSMUSG00000031357	-0.060968	15.2	13.9	12.9	10.1	5.7	4.8	38.3
Zbtb39	ENSRNOG00000004306	-1.38202	ENSMUSG00000044617	-0.26748	3.6	2.7	4.2	4.4	1.6	3.1	2.6
Tor3a	ENSRNOG00000004307	4.01471	ENSMUSG00000060519	-4.16099	8.5	0.6	7.7	1.6	0.7	42.2	3.7
Caskin2	ENSRNOG00000004310	-7.26093	ENSMUSG00000034471	-3.73697	13	2.3	105.3	38.1	10.5	0.5	16.6
Tmbim4	ENSRNOG00000004312	5.14291	ENSMUSG00000020225	-1.31377	30.1	20.1	55	57.3	55	54.9	47.5
Ppm1h	ENSRNOG00000004314	3.25172	ENSMUSG00000034613	0.590356	1.3	6.7	4.4	1.4	1.5	10.3	7.8
Tgm4	ENSRNOG00000004320	-1.92393	ENSMUSG00000025787	-1.95936	0.7	0.3	0.7	1.6	1.6	1.1	1.3
Sh3kbp1	ENSRNOG00000004322	0.150846	ENSMUSG00000040990	0.880019	3.4	12.3	5.8	4.5	7.2	9.8	9.4
Flywch1	ENSRNOG00000004333	-1.19182	ENSMUSG00000040097	0.711897	13.7	18.7	17.3	14.5	10.8	5.3	6.9
Fam20b	ENSRNOG00000004337	1.38477	ENSMUSG00000033557	0.448328	9.3	15.1	21.1	12.1	5.3	8.4	10.2
Yy1	ENSRNOG00000004339	-0.301941	ENSMUSG00000021264	0.350582	12.9	21.4	19.2	18.5	8.5	10.9	30.7
Ahr	ENSRNOG00000004342	3.56065	ENSMUSG00000019256	0.234465	1	1	0.3	0.2	0.1	0.3	3.2
Zdhhc3	ENSRNOG00000004344	-0.828475	ENSMUSG00000025786	0.196892	4	8.1	10.7	8.9	5.4	5.8	7.6
Daam1	ENSRNOG00000004345	-0.476345	ENSMUSG00000034574	1.6563	25.3	34.2	8.1	14	7.8	0.9	9
Ppfia2	ENSRNOG00000004353	-0.134327	ENSMUSG00000053825	2.82938	0.3	7.7	3.6	1.3	0.7	0.1	0.5
Wars	ENSRNOG00000004359	3.91114	ENSMUSG00000021266	-0.319636	10.4	16.8	26.3	23.7	17.8	22.2	25.4
Rps6ka5	ENSRNOG00000004362	-2.175	ENSMUSG00000021180	0.548437	4.2	3.9	1.7	3.7	3.2	1.5	1.7
Elk3	ENSRNOG00000004367	-6.26801	ENSMUSG00000008398	-3.8437	3.9	0.7	4.2	0.8	0.2	16.6	34.6
Ddx39a	ENSRNOG00000004373	1.39017	ENSMUSG00000005481	-0.88033	10.2	6.7	9.4	10.1	4.2	17	23.1
Alx1	ENSRNOG00000004390	1.32956	ENSMUSG00000036602	3.20343e-16	0.1	0.1	0.1	0.1	0.1	0.1	0.1
Aatk	ENSRNOG00000004392	2.71533	ENSMUSG00000025375	-1.36641	10.1	19.8	13.1	142.7	135.2	4.8	0.4
Fbxw11	ENSRNOG00000004395	2.08607	ENSMUSG00000020271	-0.261462	26.3	25.5	28	29.5	17.2	39.2	43.2
Dlx4	ENSRNOG00000004399	-0.366458	ENSMUSG00000020871	3.20343e-16	0.1	0.1	0.1	0.1	0.1	0.1	0.1
Mrpl13	ENSRNOG00000004401	-0.485895	ENSMUSG00000022370	0.0813001	15	21.9	23	15.3	16.5	14.7	39.7
Slc25a32	ENSRNOG00000004403	3.0969	ENSMUSG00000022299	-0.133856	3.7	2.4	2.7	1.9	1.2	1.2	5.1
Tspan8	ENSRNOG00000004411	-6.71284	ENSMUSG00000034127	-1.11548	0.1	0.1	0.2	0.1	0.1	0.7	0.1
Rad21	ENSRNOG00000004420	3.24522	ENSMUSG00000022314	0.111223	21.6	30.1	43.2	26.1	21.9	11.7	42.7
Tmem5	ENSRNOG00000004421	0.998077	ENSMUSG00000034620	-0.817339	12.9	9.6	21.5	21.3	24.7	5.7	15.4
Rabif	ENSRNOG00000004424	2.61848	ENSMUSG00000042229	0.49834	4.6	10.1	7.3	8.8	9.8	3.9	8.5
Rps27a	ENSRNOG00000004426	-0.589339	ENSMUSG00000020460	-0.482782	0.5	1.3	1.3	3	1.8	2.1	2.2
Map2k6	ENSRNOG00000004437	2.90203	ENSMUSG00000020623	0.473931	9.1	5	1.7	0.6	0.5	3.4	6.3
Cntn1	ENSRNOG00000004438	-2.49313	ENSMUSG00000055022	-0.932313	1.5	38	281.1	131.4	20.3	0.4	0.4
E2f6	ENSRNOG00000004449	-1.3916	ENSMUSG00000057469	1.41724	10.6	14.6	9.7	2.4	0.7	2.8	6.6
Sdr9c7	ENSRNOG00000004459	1.70951	ENSMUSG00000040127	3.20343e-16	0.1	0.1	0.1	0.1	0.1	0.1	0.1
Sel1l	ENSRNOG00000004464	-0.0724633	ENSMUSG00000020964	-0.462209	25	17.3	42.5	34.9	14.7	11.7	14.2
Polr3h	ENSRNOG00000004471	-0.60912	ENSMUSG00000022476	-0.881737	47.1	10.8	23.3	30.6	8.9	5.1	4.4
Klhdc2	ENSRNOG00000004474	3.50728	ENSMUSG00000020978	1.42152	15.2	49.6	30.5	27.2	12.9	8.5	16.8
Wif1	ENSRNOG00000004476	-4.04024	ENSMUSG00000020218	2.58496	0.1	0.8	0.2	0.1	0.1	0.1	0.2
Ublcp1	ENSRNOG00000004477	0.462993	ENSMUSG00000041231	-0.655089	5.9	2.9	4.1	4.5	3.1	2.2	7.6
Aurka	ENSRNOG00000004479	0.447833	ENSMUSG00000027496	-0.237039	1.9	1.4	3.5	0.8	0.4	0.8	2.5
Adss	ENSRNOG00000004481	1.96074	ENSMUSG00000015961	0.801586	15.6	26	14.5	6.9	3.5	6.4	42.6
Ptprr	ENSRNOG00000004483	3.87475	ENSMUSG00000020151	0.935149	0.7	2.9	4.4	0.8	0.1	0.1	3
Tasp1	ENSRNOG00000004493	-0.832605	ENSMUSG00000039033	1.72247	2.5	4.4	2.2	1	0.5	0.5	1.3
Lta4h	ENSRNOG00000004494	4.17559	ENSMUSG00000015889	-0.456306	16.7	11.2	13.7	10.8	5.1	10.9	35
Rock2	ENSRNOG00000004496	-2.0243	ENSMUSG00000020580	0.148099	9.5	8.2	9.2	4.1	1.9	3	16.7
Myc	ENSRNOG00000004500	-4.08031	ENSMUSG00000022346	-0.749457	17.5	6.9	8.3	3.9	1	36.3	2.6
Eapp	ENSRNOG00000004509	-1.07726	ENSMUSG00000054302	-0.188345	8	9.8	11.1	13	13.3	6.9	14.7
Slc35b1	ENSRNOG00000004510	-2.31987	ENSMUSG00000020873	-0.67013	49.5	29.6	51.6	59.5	38.8	24.3	58.9
Pes1	ENSRNOG00000004515	-2.19827	ENSMUSG00000020430	-1.06711	3	3.5	7.3	5.7	5.2	16	6.8
Itgbl1	ENSRNOG00000004516	0.853014	ENSMUSG00000032925	3.94753	0.1	1.8	0.2	0.1	0.1	0.1	0.1
Igf1	ENSRNOG00000004517	-1.13729	ENSMUSG00000020053	4.14975	0.1	7.1	0.3	0.1	0.1	1.5	0.3
Cacnb1	ENSRNOG00000004518	1.85706	ENSMUSG00000020882	1.91674	17.7	20.2	7.2	2.6	2	2.1	0.5
Atg2b	ENSRNOG00000004519	-4.29525	ENSMUSG00000041341	0.427421	5.2	5.2	4.4	5.7	2.6	2.1	3.2
Wdr60	ENSRNOG00000004520	-3.09633	ENSMUSG00000042050	0.469485	4.9	2.7	2.6	1.9	0.6	0.4	1.3
Prpf39	ENSRNOG00000004521	-0.817075	ENSMUSG00000035597	0.572214	30.4	16.9	13.6	9.9	1.4	1.9	11
Cox7a2l	ENSRNOG00000004526	1.01649	ENSMUSG00000024248	-0.574541	20.6	49.4	53.1	39.3	72.4	140	116
Fam69b	ENSRNOG00000004532	0.489702	ENSMUSG00000036186	1.53207	5.8	24.1	27.5	8	1.3	2.2	5.2
Spdya	ENSRNOG00000004534	1.08609	ENSMUSG00000052525	0.874469	1.6	1.1	1	0.4	0.1	0.2	0.3
Rxrg	ENSRNOG00000004537	1.1944	ENSMUSG00000015843	0.380604	2.6	2.3	6.5	1	0.2	0.2	0.1
Brd1	ENSRNOG00000004538	2.18901	ENSMUSG00000022387	0.782353	14.2	17.4	10.8	11.6	5	7.7	11.4
Ttc8	ENSRNOG00000004542	1.99709	ENSMUSG00000021013	0.820591	8.7	7.3	7	3.9	1.7	0.8	2.7
Ube2e3	ENSRNOG00000004544	3.57331	ENSMUSG00000027011	0.376271	18.5	46.1	45.1	44.1	31.5	19.7	54.2
Dhx40	ENSRNOG00000004549	-2.66486	ENSMUSG00000018425	-0.594645	11.9	6.6	8.3	6.3	4.7	2.1	26.5
Sec14l4	ENSRNOG00000004555	0.146871	ENSMUSG00000019368	3.20343e-16	0.1	0.1	0.1	0.1	0.1	0.1	0.1
Dcaf5	ENSRNOG00000004556	-0.951651	ENSMUSG00000049106	1.12465	6.4	14.9	8.7	6	4.1	6.3	9.5
Cacna1b	ENSRNOG00000004560	5.44019	ENSMUSG00000004113	4.4441	0.1	15.6	2.2	0.7	1	0.2	0.1
Sec24a	ENSRNOG00000004563	0.0340365	ENSMUSG00000036391	0.12821	7.3	4.9	4.9	5.6	1.3	3.7	4.1
Ofd1	ENSRNOG00000004574	1.52344	ENSMUSG00000040586	-0.0671142	2.6	2.1	2.4	1.2	0.3	0.9	5.8
Fez2	ENSRNOG00000004577	0.0495843	ENSMUSG00000056121	-2.26192	9.4	5.4	17.3	14.1	18.2	77.6	18.8
Zdhhc9	ENSRNOG00000004581	0.265354	ENSMUSG00000036985	-1.59743	9.4	16	18.2	94.7	130.5	15.3	22.4
Pou6f1	ENSRNOG00000004595	-3.57473	ENSMUSG00000009739	0.801249	14	16.7	22.1	7.9	2.9	8.3	2.3
Rnf145	ENSRNOG00000004602	-0.884639	ENSMUSG00000019189	-0.0971254	23.6	21.3	32.8	29.2	19.1	24	8
Slc38a10	ENSRNOG00000004604	-0.379426	ENSMUSG00000061306	-0.664633	12.1	18.2	17.2	25.6	25.9	67	25.3
Pam16	ENSRNOG00000004608	4.47904	ENSMUSG00000014301	0.283793	1.1	1.4	1.3	0.9	1	0.9	1.7
Ppp1cb	ENSRNOG00000004612	-0.0296223	ENSMUSG00000014956	0.371392	33.2	53.9	37	75.8	26.9	7.8	69.3
Gpm6b	ENSRNOG00000004613	-4.15799	ENSMUSG00000031342	-0.518998	332.6	116.1	257.9	183.3	213.5	3.8	7.1
Npm1	ENSRNOG00000004616	2.06756	ENSMUSG00000057113	0.387466	9.5	16.7	10.6	9.2	5.5	5	36.8
Rtn4	ENSRNOG00000004621	0.981973	ENSMUSG00000020458	0.383689	27.7	87	35.4	149	92.5	49	46.5
Rnd3	ENSRNOG00000004624	3.10706	ENSMUSG00000017144	2.13828	6.5	12.4	3.4	1.8	0.3	0.2	4.7
Fkbp3	ENSRNOG00000004629	0.079812	ENSMUSG00000020949	1.61029	18.4	54.6	21.7	17.6	13.7	5.3	30.6
Fbxo7	ENSRNOG00000004637	-0.415606	ENSMUSG00000001786	-2.05364	7.7	3.3	22.3	24.9	6	11.4	9.9
Traf6	ENSRNOG00000004639	-6.99371	ENSMUSG00000027164	-1.23654	4.7	2.9	11.4	8.2	3	6.2	7.5
Mtfp1	ENSRNOG00000004640	5.37976	ENSMUSG00000004748	1.62619	2.8	7.1	3.8	0.6	2.1	4.1	0.4
Sstr4	ENSRNOG00000004641	0.314477	ENSMUSG00000037014	3.21299	0.1	1.7	0.3	0.1	0.2	0.1	0.3
Galnt5	ENSRNOG00000004645	-1.93731	ENSMUSG00000026828	3.20343e-16	0.1	0.1	0.1	0.1	0.1	0.1	0.1
Begain	ENSRNOG00000004650	1.16266	ENSMUSG00000040867	2.7879	0.8	22.1	4.2	1.7	6.4	5.8	0.3
Creld2	ENSRNOG00000004659	-5.69138	ENSMUSG00000023272	-1.60486	16.6	5.2	19.5	14.7	4.7	16.8	22.6
Fzd6	ENSRNOG00000004660	-0.467442	ENSMUSG00000022297	-4.81103	5.9	0.7	1.3	0.2	0.1	0.2	110.2
Sec14l2	ENSRNOG00000004672	1.27434	ENSMUSG00000003585	-1.0681	26.3	5	11.7	9.6	10.2	4.6	0.5
Pak3	ENSRNOG00000004676	-0.308171	ENSMUSG00000031284	2.71794	0.4	15.9	6	6.3	1.6	0.1	0.1
Zeb2	ENSRNOG00000004677	-7.03061	ENSMUSG00000026872	0.0433564	10	15.2	16.5	31.1	19.1	9.7	2.1
Kif5c	ENSRNOG00000004680	-1.45557	ENSMUSG00000026764	2.98406	3.3	72	9.2	13.5	26.7	1.6	0.3
Spop	ENSRNOG00000004686	1.4213	ENSMUSG00000057522	0.505596	24.3	47.3	24.4	50.4	60	12.1	28.7
Thbd	ENSRNOG00000004687	-3.15835	ENSMUSG00000074743	-3.63743	0.4	0.3	1.1	0.1	0.1	2.3	18.4
Rbfox2	ENSRNOG00000004688	3.57138	ENSMUSG00000033565	3.10143	9.7	54.5	11.3	4.5	1.8	1.9	8.9
Celf5	ENSRNOG00000004695	4.69926	ENSMUSG00000034818	4.42597	0.7	41.2	6.1	1.3	1.5	1.7	0.2
Arhgap5	ENSRNOG00000004696	2.2293	ENSMUSG00000035133	-0.69586	42.4	8.9	8.7	16.1	2.8	3.1	13.4
Baalc	ENSRNOG00000004697	2.449	ENSMUSG00000022296	-0.244622	108.4	23	35	5.1	9.1	4.9	1
Nxt1	ENSRNOG00000004700	-1.3154	ENSMUSG00000036992	-0.477773	5.3	4.5	10.3	4.9	3.1	4.7	9.3
Muc15	ENSRNOG00000004703	-0.913943	ENSMUSG00000050808	3.20343e-16	0.1	0.1	0.1	0.1	0.1	0.1	0.1
Foxn3	ENSRNOG00000004709	-0.115896	ENSMUSG00000033713	-0.111031	7.3	10	6.7	19.4	12.2	11	8.2
Rbks	ENSRNOG00000004710	-2.78949	ENSMUSG00000029136	-2.30256	1.3	0.5	0.4	2.9	4.1	3.4	2.7
Mta1	ENSRNOG00000004711	-0.58443	ENSMUSG00000021144	0.537028	22.5	25.9	24.5	19.4	9.1	14	17.6
Fcf1	ENSRNOG00000004723	1.9453	ENSMUSG00000021243	-0.387023	1.4	1.3	1.4	1.4	1.3	1.7	3
Meis2	ENSRNOG00000004730	1.58057	ENSMUSG00000027210	1.97386	22.1	23.7	11	2.3	0.4	0.2	0.2
Ano3	ENSRNOG00000004731	1.57017	ENSMUSG00000074968	-0.0780025	0.1	0.3	1.3	0.2	0.1	0.1	0.1
Ralgps2	ENSRNOG00000004736	0.0728641	ENSMUSG00000026594	2.03922	4.1	17.4	9.9	3.1	0.4	2.5	5.4
Cd48	ENSRNOG00000004737	-5.71106	ENSMUSG00000015355	-3.71882	0.1	0.1	0.4	0.1	0.1	7.1	0.1
Mmadhc	ENSRNOG00000004740	1.94924	ENSMUSG00000026766	-0.490172	18.2	15.9	20.4	30	22.6	15.7	27.1
Jkamp	ENSRNOG00000004751	4.79802	ENSMUSG00000005078	-0.0707958	19.9	16.9	20.5	26.3	15.7	6.9	17.2
Nalcn	ENSRNOG00000004752	4.28677	ENSMUSG00000000197	1.76841	0.4	20.1	19.2	11.5	4.1	0.1	0.1
Commd9	ENSRNOG00000004755	-1.50403	ENSMUSG00000027163	-0.331299	6.6	13.3	15.6	15.9	25	24.1	13.2
Sirpa	ENSRNOG00000004763	-0.424194	ENSMUSG00000037902	-2.56388	85.7	22.4	56.3	7.8	5.9	620.9	18.1
Yaf2	ENSRNOG00000004773	0.820699	ENSMUSG00000022634	-0.367962	14.2	18.3	24.6	30	20.6	10.2	42.1
Cstf1	ENSRNOG00000004775	2.07021	ENSMUSG00000027498	-0.183066	8.8	8.5	10.6	7.3	5.9	17.2	8.1
Ftsj1	ENSRNOG00000004776	-0.182486	ENSMUSG00000031171	-0.291105	3.4	4.1	6.2	6.1	5	3.1	6.3
Crmp1	ENSRNOG00000004781	4.32038	ENSMUSG00000029121	5.01895	3.8	224.8	22.8	6.4	4.5	2.3	1.8
AABR07053185.1	ENSRNOG00000004787	-1.8038	ENSMUSG00000027167	0.0984626	8.4	4.8	6.2	4.9	2.8	0.7	3.9
Arf6	ENSRNOG00000004791	2.65077	ENSMUSG00000044147	-0.697562	17.4	19.3	15.4	14.8	10.1	55.2	74.9
Ncln	ENSRNOG00000004793	-2.25592	ENSMUSG00000020238	-0.89298	29.7	17.6	27.1	37	29.8	52	20.5
Rtn1	ENSRNOG00000004794	1.15116	ENSMUSG00000021087	2.52376	45.6	609.2	216.5	273.1	64.8	30.8	4.8
Stac2	ENSRNOG00000004805	-1.32989	ENSMUSG00000017400	1.4975	0.1	2.4	0.9	0.4	2.2	1.3	0.2
Arf2	ENSRNOG00000004807	8.02783	ENSMUSG00000062421	-0.161735	12.9	22.9	24.8	21	12.3	31.1	51.6
Plcb1	ENSRNOG00000004810	4.95866	ENSMUSG00000051177	1.50901	2.6	11.1	7.7	7.6	0.8	0.1	4.6
Sema6d	ENSRNOG00000004812	-0.730797	ENSMUSG00000027200	-1.6298	77.3	8.8	19.1	27.7	6.8	1.9	30.6
Porcn	ENSRNOG00000004819	0.904683	ENSMUSG00000031169	0.257676	19.2	21.5	34.1	30	15.5	4.6	4.5
Sar1b	ENSRNOG00000004820	0.968833	ENSMUSG00000020386	-0.666623	33.6	31.1	61.6	72.3	44.5	22.3	61.9
Sos2	ENSRNOG00000004826	-0.760045	ENSMUSG00000034801	0.396517	6.7	8.6	6.1	8.1	4.7	1.3	12.3
Papola	ENSRNOG00000004827	2.65744	ENSMUSG00000021111	-0.038889	18.1	18.3	24.9	15.7	6.6	9.6	37.9
Acvr1c	ENSRNOG00000004828	3.95156	ENSMUSG00000026834	-0.584963	0.4	0.1	0.1	0.1	0.1	0.1	0.1
Immp1l	ENSRNOG00000004829	-4.85174	ENSMUSG00000042670	-0.931613	1.1	0.9	1.8	2.1	2	0.4	2.9
Arid2	ENSRNOG00000004831	-1.14058	ENSMUSG00000033237	0.589654	10.3	7.7	6.7	4.5	1.2	2.4	5.6
B4galnt1	ENSRNOG00000004839	2.88332	ENSMUSG00000006731	0.653099	0.4	16.8	21.2	5.2	1.8	35.1	0.4
Akap6	ENSRNOG00000004841	4.46634	ENSMUSG00000061603	1.66335	7.8	10.4	4.6	2.7	4.3	0.2	0.1
Med30	ENSRNOG00000004844	2.40104	ENSMUSG00000038622	-0.818091	4.7	10.2	20.8	31.4	25.4	10.9	14.7
Atp6v1c1	ENSRNOG00000004846	-1.09787	ENSMUSG00000022295	0.630995	18	40.6	22.7	21.9	19.1	57.2	18.4
Mpped2	ENSRNOG00000004863	-0.276615	ENSMUSG00000016386	1.13217	4.7	9.9	11.7	5.9	1.2	0.2	3.4
Prpf40a	ENSRNOG00000004864	4.52172	ENSMUSG00000061136	-0.212304	15.7	8.2	11	9.4	3	3	14.9
Dyrk3	ENSRNOG00000004870	4.93863	ENSMUSG00000016526	1.52083	3.3	5.5	4.8	1.5	0.1	1.7	0.1
Flrt3	ENSRNOG00000004874	1.29182	ENSMUSG00000051379	2.88174	3.7	19.9	9.6	2.2	0.2	0.2	0.3
Erh	ENSRNOG00000004883	-0.225851	ENSMUSG00000021131	-0.090792	25.9	33.1	45.6	49.2	21.4	21.8	47.6
Atp5s	ENSRNOG00000004893	-1.31639	ENSMUSG00000054894	0.531325	4.5	6.6	7.9	5.5	4.2	1.4	3.9
Kcns3	ENSRNOG00000004899	3.46933	ENSMUSG00000043673	0.263034	0.2	0.2	0.4	0.1	0.1	0.1	0.1
Slc4a1ap	ENSRNOG00000004901	3.69395	ENSMUSG00000029141	0.660251	5.3	5.9	5.1	3.4	2.4	2.1	4.1
Ebp	ENSRNOG00000004903	5.21123	ENSMUSG00000031168	-2.27117	4.6	5.4	10.3	45.4	49.9	29.5	16.7
Pa2g4	ENSRNOG00000004904	3.01971	ENSMUSG00000025364	-0.022431	13.5	23.4	37.2	28.2	14.4	22	27.3
Smc6	ENSRNOG00000004908	-5.79254	ENSMUSG00000020608	0.195016	7.9	5.8	8.1	3.9	1.5	0.7	8.3
Cnot2	ENSRNOG00000004909	0.916198	ENSMUSG00000020166	0.0806185	18.8	13.8	19	10.1	2.4	10.2	17.8
Eif2d	ENSRNOG00000004910	2.74413	ENSMUSG00000026427	-0.136137	9.3	9.6	14.9	10.7	8.4	6.7	13.3
Rasal2	ENSRNOG00000004917	5.38491	ENSMUSG00000070565	0.179549	6.2	4.7	4.3	3.2	2.4	0.8	8
Kcna4	ENSRNOG00000004918	1.75678	ENSMUSG00000042604	4.36923	0.2	6.2	0.7	0.4	0.3	0.1	0.1
Nusap1	ENSRNOG00000004921	0.639315	ENSMUSG00000027306	-1.1565	2.6	0.8	3.7	0.4	0.1	0.3	3.6
Ppp1r12a	ENSRNOG00000004925	-0.732355	ENSMUSG00000019907	-0.608641	44	9.4	12.4	8.8	2.1	4.1	14.6
Mettl15	ENSRNOG00000004926	-0.208134	ENSMUSG00000057234	-0.874469	2.9	1.3	3.7	1.6	1.2	1.3	3.6
Sel1l3	ENSRNOG00000004932	0.80861	ENSMUSG00000029189	1.32013	7	6.7	7.2	0.9	0.5	0.4	0.1
Sdc2	ENSRNOG00000004936	0.995846	ENSMUSG00000022261	-0.49304	28.2	9	30.1	8.5	1.8	0.3	7.1
Rnf215	ENSRNOG00000004940	1.67427	ENSMUSG00000003581	-0.917211	88.5	13	12	4.8	3.6	17.2	21.2
Actr2	ENSRNOG00000004959	-0.742356	ENSMUSG00000020152	0.348298	27.6	46.7	45	41.5	16.6	35.8	53.6
Erbb3	ENSRNOG00000004964	-1.8468	ENSMUSG00000018166	-6.62449	0.1	0.1	13.3	23.2	22.4	0.1	0.1
Snrpb2	ENSRNOG00000004967	2.18906	ENSMUSG00000008333	0.22896	10.3	15.9	11.8	11.4	6.9	6.3	34.7
Ncapg2	ENSRNOG00000004968	-5.21646	ENSMUSG00000042029	-0.0473057	2.6	1.5	3.8	1	0.3	0.3	1.3
Txlng	ENSRNOG00000004971	-1.11228	ENSMUSG00000038344	0.813587	2.6	2.9	3.3	1.4	0.2	0.1	2.3
Upp1	ENSRNOG00000004972	-4.17511	ENSMUSG00000020407	-1.79355	6.8	0.5	0.9	0.2	0.3	0.4	1.8
Ppp2r5c	ENSRNOG00000004973	1.80322	ENSMUSG00000017843	0.269113	18.7	33.3	33.5	33.6	25	15.4	39.6
Rangrf	ENSRNOG00000004980	-0.601539	ENSMUSG00000032892	0.777608	0.1	0.2	0.2	0.1	0.1	0.1	0.1
Zcrb1	ENSRNOG00000004996	0.0301725	ENSMUSG00000022635	0.133536	16.5	23	19.4	25	28.5	7.6	28.8
Jakmip1	ENSRNOG00000004998	7.08157	ENSMUSG00000063646	3.09686	1.1	7.7	0.6	2.6	0.5	0.5	0.1
Ptprn2	ENSRNOG00000005003	2.92428	ENSMUSG00000056553	3.15654	6.2	59	23	7.6	1.8	0.8	0.3
Ndufaf1	ENSRNOG00000005006	2.21856	ENSMUSG00000027305	0.0168738	7.2	4.3	6.7	4.2	3.3	2	2.1
Scn3a	ENSRNOG00000005007	0.888886	ENSMUSG00000057182	1.88835	0.1	8.7	11.3	2.4	0.1	0.1	0.1
Utp14a	ENSRNOG00000005012	-0.946066	ENSMUSG00000063785	-0.996833	6.7	3.8	6.9	6.4	2.3	5.1	18.1
Rabep1	ENSRNOG00000005015	3.22333	ENSMUSG00000020817	0.324335	19.8	12.5	12.8	10.1	5.6	2.7	8.9
Tmed4	ENSRNOG00000005016	-1.20539	ENSMUSG00000004394	-0.710221	34.3	24.5	57.7	43	26.8	32.9	45.8
Orc4	ENSRNOG00000005021	3.7354	ENSMUSG00000026761	0.505605	9.6	8.4	7.8	5.3	2.5	2	8.3
Cdkn2aipnl	ENSRNOG00000005024	3.28248	ENSMUSG00000020392	-0.47794	3.2	11.5	14.5	9.3	10.6	28.4	30.1
Surf6	ENSRNOG00000005031	0.468425	ENSMUSG00000036160	0.0725125	3.8	5.1	4.5	5.6	4.5	4.3	6.4
Acvr1	ENSRNOG00000005033	-0.0644228	ENSMUSG00000026836	-0.187257	12.5	9.5	11.7	6.5	3.5	11.6	19.1
Arhgef25	ENSRNOG00000005034	1.19048	ENSMUSG00000019467	1.12688	21.9	19.4	14.8	8	2.4	4.8	1.4
Tfpi	ENSRNOG00000005039	3.24668	ENSMUSG00000027082	-2.99799	1.2	1.5	5.1	1.6	0.4	6.4	57.2
Crip2	ENSRNOG00000005041	-0.00649723	ENSMUSG00000006356	0.561262	33.8	64.9	22.1	11.6	25.1	9	162.3
Ppp2r5e	ENSRNOG00000005045	0.923054	ENSMUSG00000021051	0.660794	10.6	16.6	17.5	13.8	4.4	3.7	13
Tspan13	ENSRNOG00000005046	-0.708585	ENSMUSG00000020577	-0.0639601	18.1	61.4	94.1	19.5	2.7	27.2	223.5
Slc39a9	ENSRNOG00000005052	0.974657	ENSMUSG00000048833	-0.264621	12.1	10.1	17	19.1	9.8	8	6.8
Egln3	ENSRNOG00000005053	5.79226	ENSMUSG00000035105	1.02346	9.9	6.2	3.3	3.8	0.5	0.5	0.3
Lpcat4	ENSRNOG00000005058	3.82265	ENSMUSG00000027134	0.620586	3.3	8.2	4.5	8.7	7.9	2.4	5.2
Dlst	ENSRNOG00000005061	-3.81038	ENSMUSG00000004789	0.207413	38.7	34.6	33.4	24.6	20.4	41.2	21.5
Atl1	ENSRNOG00000005063	3.18394	ENSMUSG00000021066	2.42321	2.5	23.6	8.5	7.3	4.4	0.7	3
Ube2b	ENSRNOG00000005064	2.58757	ENSMUSG00000020390	0.932886	28.2	58.8	28.6	26.1	19.8	20.5	61.6
LOC100911319	ENSRNOG00000005067	-4.45901	ENSMUSG00000045817	-0.769945	173.8	33.3	49.3	13.9	1.8	88.9	13
Cebpz	ENSRNOG00000005087	-2.26078	ENSMUSG00000024081	-0.268196	8.5	6.2	10.5	7.3	2.3	4.9	11.3
Bzw2	ENSRNOG00000005096	3.30569	ENSMUSG00000020547	0.638061	17.7	33.9	40.1	28.4	10.9	13.2	20.4
Ctage5	ENSRNOG00000005101	0.711606	ENSMUSG00000021000	-0.107915	12.1	10.3	12.2	14.1	6.8	8.4	13
Wfs1	ENSRNOG00000005108	2.20801	ENSMUSG00000039474	0.902534	7	6.2	2.9	3.6	2.7	1.3	2.4
Plekhh2	ENSRNOG00000005124	4.41549	ENSMUSG00000040852	-1.09311	1.2	0.5	0.5	0.6	0.7	0.5	2.9
Pqlc3	ENSRNOG00000005126	-1.31794	ENSMUSG00000045679	1.76553	0.7	1.7	0.3	0.2	0.6	0.5	0.7
Dtx3	ENSRNOG00000005129	-0.0471093	ENSMUSG00000040415	0.911894	79.6	70.4	59.4	37.2	16.3	14	18
Ogdh	ENSRNOG00000005130	0.237132	ENSMUSG00000020456	0.118563	15.4	16.9	15.8	12.6	14.9	16.6	18.1
Mapt	ENSRNOG00000005133	2.60786	ENSMUSG00000018411	2.44183	15.4	153.4	34.5	69.1	46.7	2.9	0.8
Pip4k2c	ENSRNOG00000005138	-0.674917	ENSMUSG00000025417	-0.949016	10.9	7.2	12.8	22.1	14.1	16.1	7.4
Hus1	ENSRNOG00000005141	2.56195	ENSMUSG00000020413	-2.01381	10	1.3	8.1	6.2	2.7	0.8	3.7
Tmem18	ENSRNOG00000005144	2.10946	ENSMUSG00000043061	-0.412694	12.9	7.7	18.3	11.5	5.4	4.7	8.7
Sacm1l	ENSRNOG00000005149	1.39653	ENSMUSG00000025240	0.623558	16.3	16.1	10.2	9.6	4.8	4.1	17.7
Dync2li1	ENSRNOG00000005151	0.510473	ENSMUSG00000024253	0.409704	5.8	6	10.8	4.8	1.9	0.8	3
Rbbp7	ENSRNOG00000005157	1.68081	ENSMUSG00000031353	0.632149	17.4	30.3	23.8	13.6	5.9	12.9	43.7
Slc24a5	ENSRNOG00000005158	1.25566	ENSMUSG00000035183	1	1	1	0.9	0.3	0.2	0.4	0.2
Fam135b	ENSRNOG00000005159	-0.70639	ENSMUSG00000036800	1.16993	0.1	0.6	1	0.2	0.1	0.1	0.1
Sgpp1	ENSRNOG00000005175	2.06817	ENSMUSG00000021054	-0.573226	12.6	9.6	26	24.1	14	4.5	4.5
Tp53i3	ENSRNOG00000005177	2.06979	ENSMUSG00000033488	-2.89482	8.8	0.8	6.7	2.9	1.8	14.3	1.2
Rtf1	ENSRNOG00000005183	4.41319	ENSMUSG00000027304	1.10207	7.2	12.2	8.3	4.5	1.6	3.6	8.9
Nop10	ENSRNOG00000005184	1.70317	ENSMUSG00000027133	0.465107	10.7	32.9	32.6	20.5	16	23.2	40
Nipal2	ENSRNOG00000005190	-0.431019	ENSMUSG00000038879	1.90689	0.2	2	1.3	0.5	0.1	0.1	1
Pfas	ENSRNOG00000005193	1.57313	ENSMUSG00000020899	0.0356239	8.4	4.1	5.7	4.8	2.2	1.5	1.4
Cst3	ENSRNOG00000005195	-4.25011	ENSMUSG00000027447	-4.45578	3309.3	430.7	2527	327.7	655.3	49168	721.2
Slc12a6	ENSRNOG00000005196	3.58285	ENSMUSG00000027130	0.963241	7.2	15.5	10	7	4.4	12	7.1
LOC100361694	ENSRNOG00000005203	-0.0806199	ENSMUSG00000078974	-0.485427	0.3	0.5	0.8	0.4	0.5	0.3	1.9
Spred1	ENSRNOG00000005209	-2.48924	ENSMUSG00000027351	-1.17944	42.9	11.2	51.2	29.4	8.6	13.9	6.2
Plek	ENSRNOG00000005214	-1.2339	ENSMUSG00000020120	-4.31792	0.6	1.5	21.7	0.7	1	155.2	0.3
Klhl4	ENSRNOG00000005215	-0.0929261	ENSMUSG00000025597	-4.45505	0.2	0.5	0.4	8.3	16.2	0.1	40.6
Sf3a1	ENSRNOG00000005218	2.19185	ENSMUSG00000002129	0.428144	19	17.2	15	10.1	5.8	13	13.8
Hnmt	ENSRNOG00000005223	1.38822	ENSMUSG00000026986	1.25909	2.2	7.3	6.9	2.5	2.2	4.3	0.2
Gnptab	ENSRNOG00000005228	-1.74284	ENSMUSG00000035311	-0.741082	13	10.5	16.5	38.7	31.4	1.9	3.8
Gxylt1	ENSRNOG00000005234	3.16914	ENSMUSG00000036197	-0.215937	7.1	3.2	3.1	4.1	1.2	2.3	4.5
Slc1a4	ENSRNOG00000005248	-4.02233	ENSMUSG00000020142	-0.928134	303.1	39.1	43.4	9.7	1.6	3.9	84.7
Snx6	ENSRNOG00000005249	4.49381	ENSMUSG00000005656	-0.849188	17.8	15.7	25	35.9	29.3	27.6	34.1
Zc3h15	ENSRNOG00000005256	-2.57611	ENSMUSG00000027091	0.775127	13.1	16.6	12.9	10.2	4.8	3.1	14.1
Prkaca	ENSRNOG00000005257	3.08878	ENSMUSG00000005469	1.10203	14.9	53.7	38.8	32.8	29.9	21.5	12.2
Myef2	ENSRNOG00000005258	1.14053	ENSMUSG00000027201	0.960953	15.7	24.3	26.5	15.3	4.9	1.5	11
Acp1	ENSRNOG00000005260	2.29319	ENSMUSG00000044573	0.392317	0.6	0.7	1	0.5	0.2	0.2	0.7
Fbxl5	ENSRNOG00000005261	4.07428	ENSMUSG00000039753	-0.0906025	21.9	21.6	24.9	29.9	35.3	8	18
LOC688906	ENSRNOG00000005263	3.74555	ENSMUSG00000033228	-0.38247	10.8	5.6	8.7	7.2	3.1	3.8	10.2
Sav1	ENSRNOG00000005264	2.13567	ENSMUSG00000021067	-1.21205	12.7	4	6.5	4.7	3	6.2	22.5
Sycp3	ENSRNOG00000005270	-3.04248	ENSMUSG00000020059	0.263034	0.5	0.6	1.4	0.5	0.1	0.3	0.2
Rapgef5	ENSRNOG00000005271	4.00419	ENSMUSG00000041992	-2.886	0.5	1.7	4.9	4.7	6.6	18.9	39.8
Vrk1	ENSRNOG00000005274	-0.148966	ENSMUSG00000021115	0.327165	2.8	4.6	5.3	2.2	1.4	6.4	3.9
Trhde	ENSRNOG00000005278	2.95892	ENSMUSG00000050663	4.42146	0.1	2.5	0.2	0.1	0.1	0.1	0.1
Stx16	ENSRNOG00000005281	6.5773	ENSMUSG00000027522	-0.246345	30.4	12.8	18.3	20.5	4.6	6.6	10.7
Itpka	ENSRNOG00000005284	4.76675	ENSMUSG00000027296	-0.657112	0.7	1.3	3.3	0.3	2.8	4.7	0.5
Fbxo33	ENSRNOG00000005285	3.7538	ENSMUSG00000035329	0.424315	15	10.4	9.8	6.6	1.7	5	8.4
Coch	ENSRNOG00000005286	0.0264351	ENSMUSG00000020953	3.07039	0.1	2.1	0.5	0.1	0.3	0.3	0.2
Ywhae	ENSRNOG00000005290	-0.77427	ENSMUSG00000020849	0.436275	172.9	345.2	360.7	373.5	241.4	146.6	235.6
Slc38a1	ENSRNOG00000005291	2.24712	ENSMUSG00000023169	2.18878	1.8	23.1	9.4	6.5	0.6	10.7	1.4
Kif5a	ENSRNOG00000005299	2.35471	ENSMUSG00000074657	0.536328	1.8	70	24.3	57.1	191.2	14.9	0.3
Eif2b4	ENSRNOG00000005301	5.37056	ENSMUSG00000029145	0.0367216	10.2	12.6	14.9	10.7	10.3	15.6	12
Tbc1d25	ENSRNOG00000005303	2.6127	ENSMUSG00000039201	0.93546	2.7	5.1	2.1	1.6	2.1	5.2	2.3
Slc4a10	ENSRNOG00000005307	4.23633	ENSMUSG00000026904	1.77987	0.2	9.1	12.8	2.3	0.3	0.2	0.1
Tmx2	ENSRNOG00000005308	0.115698	ENSMUSG00000050043	-0.113173	35.5	24.1	42.2	35.4	21.8	9.9	11.6
Scn8a	ENSRNOG00000005309	-6.44981	ENSMUSG00000023033	0.873823	8.9	6.2	4.9	4.8	0.9	0.6	0.2
Cul1	ENSRNOG00000005310	2.79252	ENSMUSG00000029686	-0.161789	24.6	19.1	26.8	22.8	14.5	11.4	28.1
Cnrip1	ENSRNOG00000005326	1.38358	ENSMUSG00000044629	2.69588	8.2	50	19.8	6.6	3.4	5.9	2.4
Crebbp	ENSRNOG00000005330	1.35107	ENSMUSG00000022521	1.10273	8.6	9.7	6.6	4.9	0.9	2	4.1
Csdc2	ENSRNOG00000005332	-1.22262	ENSMUSG00000042109	2.26925	78.1	83.8	10.1	3.1	7.6	4.3	1.1
Azin1	ENSRNOG00000005333	-1.35583	ENSMUSG00000037458	0.53898	64.1	44	36.5	20.9	10.3	30.8	19.1
Acvr2a	ENSRNOG00000005334	1.61984	ENSMUSG00000052155	1.69095	5.3	12	7.3	3.2	0.3	0.7	5.5
Galnt13	ENSRNOG00000005335	3.03505	ENSMUSG00000060988	-0.521953	0.1	2.6	14.3	6.1	1.7	0.1	0.1
Rassf5	ENSRNOG00000005342	-1.2823	ENSMUSG00000026430	-0.847997	0.3	2.5	2.6	0.3	0.3	23.2	0.3
Nol10	ENSRNOG00000005344	2.64388	ENSMUSG00000061458	0.0365259	8.4	4	4	3.2	1	2.1	4.7
Vsnl1	ENSRNOG00000005345	2.60175	ENSMUSG00000054459	3.35933	0.6	50.8	16.2	3.5	5.4	2.5	1.5
Tmem128	ENSRNOG00000005346	-1.23097	ENSMUSG00000067365	-0.34032	23.5	26.5	30.1	44.1	40.5	13.6	49.5
Fjx1	ENSRNOG00000005347	1.91167	ENSMUSG00000075012	-0.194269	169.6	29.6	16.6	5.2	4.8	4.1	2.9
Pamr1	ENSRNOG00000005348	1.68868	ENSMUSG00000027188	-2.34577	41.1	1.6	5.5	0.8	0.6	0.7	0.1
Pwp1	ENSRNOG00000005350	4.84149	ENSMUSG00000001785	-0.156869	6.2	7.4	13.6	9.7	4.2	7.5	8.3
Rybp	ENSRNOG00000005353	-1.6641	ENSMUSG00000072872	0.333519	10.1	15.1	9.5	16.4	7	5.6	23.3
Ncstn	ENSRNOG00000005355	2.47053	ENSMUSG00000003458	-0.543164	29.2	21.4	29.8	22.6	20.1	52.2	33.2
Pmm1	ENSRNOG00000005358	3.69053	ENSMUSG00000022474	0.319104	74.1	40.4	26.1	24.7	53.8	11.4	4.2
Dhrs7b	ENSRNOG00000005360	5.3408	ENSMUSG00000042569	-0.959358	8.3	6.9	11.8	11.9	16.5	19.5	12.5
Rab3ip	ENSRNOG00000005362	3.31434	ENSMUSG00000064181	0.381679	3.4	7.6	11.5	6.3	4.2	4.9	4.7
Kcnip1	ENSRNOG00000005365	-2.94018	ENSMUSG00000053519	2.5805	1.8	32.3	24.4	5.1	0.7	0.2	0.2
Klhl29	ENSRNOG00000005371	1.58522	ENSMUSG00000020627	3.44057	0.1	3.8	0.9	0.5	0.3	0.2	0.1
Lyar	ENSRNOG00000005374	-4.00759	ENSMUSG00000067367	-0.142958	3.5	3.2	4	3	1.3	2.3	7.1
Tmem11	ENSRNOG00000005377	0.247349	ENSMUSG00000043284	-0.0316182	13.1	17.3	14.4	13.3	8.1	27.1	30.1
Gna15	ENSRNOG00000005378	1.03777	ENSMUSG00000034792	-7.42906	0.1	0.1	2.2	0.1	0.2	100.7	0.1
Kitlg	ENSRNOG00000005386	1.19329	ENSMUSG00000019966	-2.65929	3.2	3.1	0.5	0.1	0.2	0.9	112.6
Rbm3	ENSRNOG00000005387	0.0897736	ENSMUSG00000031167	0.389947	5.2	7.6	5.4	5.2	1.4	4.7	12.9
Rassf3	ENSRNOG00000005388	-2.43651	ENSMUSG00000025795	-1.89185	1.8	4.5	3.3	1.1	1.5	22.4	70.1
Ppp2ca	ENSRNOG00000005389	0.0192544	ENSMUSG00000020349	0.000390076	68	123.3	132.9	202.7	135.7	91.4	108.9
Nup210	ENSRNOG00000005390	-2.34495	ENSMUSG00000030091	0.39486	3.6	7.1	14.5	5.8	0.7	1.1	6.7
Prex2	ENSRNOG00000005391	-1.47991	ENSMUSG00000048960	-4.54432	6.2	0.2	2.9	0.5	0.3	0.1	18
Sertad2	ENSRNOG00000005393	4.15333	ENSMUSG00000049800	-0.0874628	10.3	7.2	8.8	10.5	2.1	5.4	8.8
Maea	ENSRNOG00000005397	-1.68054	ENSMUSG00000079562	0.184083	20.2	25.6	18.8	18.1	13.4	29	35.7
Clint1	ENSRNOG00000005406	-0.221754	ENSMUSG00000006169	-0.962157	11.5	10.3	17.9	13.8	6.8	25.5	44.9
Aftph	ENSRNOG00000005411	4.31316	ENSMUSG00000049659	0.691878	8.6	11.9	9.7	5.9	2.3	8.9	8.8
Trap1	ENSRNOG00000005418	2.11991	ENSMUSG00000005981	-0.647931	20	13.2	22.6	25	19.2	16.2	21.1
Odc1	ENSRNOG00000005424	2.78986	ENSMUSG00000011179	-1.67934	18.4	8.3	16.2	8.9	3.6	16.8	95.6
Ctbp1	ENSRNOG00000005428	-0.392676	ENSMUSG00000037373	0.0732338	35.7	66	69.7	92.8	76.4	54	47.8
Shq1	ENSRNOG00000005433	0.803759	ENSMUSG00000035378	-0.754888	0.4	0.8	1.6	0.7	0.5	2.1	2.8
Pcsk2	ENSRNOG00000005438	4.99736	ENSMUSG00000027419	1.74991	0.1	19.9	26.9	5.3	2.1	0.9	0.2
Gna11	ENSRNOG00000005446	1.86427	ENSMUSG00000034781	0.167442	13.2	25.4	28.8	34.8	21.7	6.1	31.1
Lgalsl	ENSRNOG00000005464	-1.3785	ENSMUSG00000048398	3.20343e-16	0.1	0.1	0.1	0.1	0.1	0.1	0.1
Rbm28	ENSRNOG00000005468	2.05126	ENSMUSG00000029701	-0.0588937	12.4	6.8	9.4	8.3	3.8	3.1	5.5
Fkbp9	ENSRNOG00000005478	-3.21275	ENSMUSG00000029781	0.8665	30.2	66.7	23.2	69.2	26.2	12.6	58.1
Slc1a2	ENSRNOG00000005479	-2.2705	ENSMUSG00000005089	-2.43733	731.7	29.3	172	15.7	23.2	7.9	1.7
Sap30bp	ENSRNOG00000005482	0.353361	ENSMUSG00000020755	-0.0498652	5.8	10.9	11.9	12.5	15.5	12.1	9.9
Rpap1	ENSRNOG00000005483	4.68635	ENSMUSG00000034032	-0.456065	6.4	3.9	7.5	6.2	3.8	4.1	4.1
Best3	ENSRNOG00000005491	-1.33058	ENSMUSG00000020169	3.20343e-16	0.1	0.1	0.1	0.1	0.1	0.1	0.1
Hpcal1	ENSRNOG00000005492	2.77681	ENSMUSG00000071379	0.616671	0.8	11.5	4	4.1	7.5	10.5	18.1
Ing3	ENSRNOG00000005496	3.57138	ENSMUSG00000029670	-0.253757	12.9	5.2	8	5	1.4	2	7.9
Ankib1	ENSRNOG00000005502	0.079108	ENSMUSG00000040351	-0.345198	10.3	8.2	10.7	18.8	13.4	1.9	7.4
Pkp4	ENSRNOG00000005504	-1.0875	ENSMUSG00000026991	0.102161	5.5	33.4	8.8	50.5	81	6.4	34.5
Wbp11	ENSRNOG00000005505	1.83675	ENSMUSG00000030216	0.352586	17.4	21.6	17.7	23.4	13.4	14.7	14.9
Pak7	ENSRNOG00000005509	6.2231	ENSMUSG00000039913	1.58496	0.1	4.7	2.6	3.6	2.9	0.1	0.1
Ndufa4	ENSRNOG00000005512	1.08169	ENSMUSG00000029632	0.290545	75.4	167.3	176.3	143.4	116.5	64.6	244.5
Srsf5	ENSRNOG00000005513	-4.00045	ENSMUSG00000021134	0.334807	123.8	64.7	46.1	34.3	13.5	41.3	48.8
Rhbdl3	ENSRNOG00000005515	1.26584	ENSMUSG00000017692	0.115477	1.7	1.3	3	1.4	0.7	0.3	0.1
Grm3	ENSRNOG00000005519	0.126116	ENSMUSG00000003974	-2.3086	158.4	5.8	7.7	0.9	2.9	0.8	1.7
Pno1	ENSRNOG00000005524	2.16258	ENSMUSG00000020116	-0.163976	8.3	9	8.3	18	14.3	4.4	7.2
Tbk1	ENSRNOG00000005528	6.32971	ENSMUSG00000020115	0.531664	10.7	9.3	7.3	4.3	1.2	5.4	9.7
Psmd11	ENSRNOG00000005538	4.49924	ENSMUSG00000017428	0.407424	4.7	6.3	6.2	4.9	2.8	5.1	4.8
Lrfn5	ENSRNOG00000005550	5.23562	ENSMUSG00000035653	3.46211	0.1	9	3.5	0.9	0.2	0.1	0.1
Derl1	ENSRNOG00000005551	5.13366	ENSMUSG00000022365	-0.764767	30	22.1	27	35	23.4	83.6	26.3
Snrpf	ENSRNOG00000005556	-2.9631	ENSMUSG00000020018	-0.773724	3.1	3.1	7.1	4.8	2.1	6.1	8.6
Ubn2	ENSRNOG00000005564	2.21314	ENSMUSG00000038538	0.698056	10.4	6.3	4.9	3.5	0.9	1.2	2.4
Phospho1	ENSRNOG00000005569	0.0302627	ENSMUSG00000050860	-2.0133	0.5	0.9	1.4	2.8	12.9	1.4	2.8
Rpia	ENSRNOG00000005576	2.62606	ENSMUSG00000053604	-0.0435016	5.6	4.9	5.7	4.2	2	8.9	3.9
Suclg1	ENSRNOG00000005587	2.39458	ENSMUSG00000052738	-0.599994	33.6	24.4	49.4	35.9	30.4	23.8	48.8
Dhrs7	ENSRNOG00000005589	-0.165903	ENSMUSG00000021094	-2.78543	18.3	3	26.5	35.3	12.2	13.6	18.2
Nr4a2	ENSRNOG00000005600	-0.154432	ENSMUSG00000026826	0.456638	52.8	17.2	2.3	1.2	0.5	0.4	18
Med1	ENSRNOG00000005606	1.67274	ENSMUSG00000018160	0.361625	13.8	10.9	10.1	9.6	2.1	5.4	9.9
Neurod1	ENSRNOG00000005609	3.04547	ENSMUSG00000034701	5.08746	0.1	3.4	0.1	0.1	0.1	0.1	0.1
Yipf4	ENSRNOG00000005610	-0.969923	ENSMUSG00000024072	0.237169	18.7	19.9	18.8	16.4	8.8	8.2	30.4
Txn2	ENSRNOG00000005614	2.75867	ENSMUSG00000005354	-0.0965976	28.8	42.6	55.1	50.2	36.6	45.8	56.8
Lcp2	ENSRNOG00000005620	1.42265	ENSMUSG00000002699	-5.28129	0.1	0.3	2.9	0.1	0.3	52.3	14.3
Ankmy2	ENSRNOG00000005623	2.27967	ENSMUSG00000036188	0.420843	14.3	8.3	9.8	4.1	1.8	2.1	5.1
Zfx	ENSRNOG00000005624	-1.95796	ENSMUSG00000079509	-0.0798533	8.3	4.1	4.9	4.2	0.8	1.7	6.1
Zbtb49	ENSRNOG00000005633	-2.15545	ENSMUSG00000029127	0.819428	2.9	3	2.5	1.5	0.4	1.7	1.2
Lingo2	ENSRNOG00000005634	5.07314	ENSMUSG00000045083	3.06362	0.1	8.5	1.6	3.2	1	0.1	0.1
Fbxl4	ENSRNOG00000005641	-1.29487	ENSMUSG00000040410	-0.445626	8.7	3.5	6.7	4.4	1.8	2.3	4.7
Frs2	ENSRNOG00000005642	0.294534	ENSMUSG00000020170	0.701477	9.8	8.7	5.8	6.9	4.3	2.2	3.1
Cntn4	ENSRNOG00000005652	4.19709	ENSMUSG00000064293	-0.459432	0.1	1.6	10.4	2.3	0.2	0.1	0.1
Aurkb	ENSRNOG00000005659	-1.47474	ENSMUSG00000020897	-0.982722	2.3	0.7	2.9	0.3	0.1	0.6	2.1
Grm7	ENSRNOG00000005662	3.98513	ENSMUSG00000056755	2.05772	0.1	3.4	1.8	1.9	0.7	0.1	0.3
Ndufa8	ENSRNOG00000005668	-0.839579	ENSMUSG00000026895	-0.341341	18.2	37.4	50.1	56.8	63	32.5	63.7
Car8	ENSRNOG00000005669	1.34104	ENSMUSG00000041261	-1.32193	31.2	3.5	15.2	5.1	0.5	0.2	0.3
Runx1t1	ENSRNOG00000005673	3.39103	ENSMUSG00000006586	3.65535	0.3	4.2	1.1	0.3	0.1	0.1	0.1
Suclg2	ENSRNOG00000005686	-3.38839	ENSMUSG00000061838	-2.21809	7.3	1.2	9.2	2	0.8	6	8.2
Yeats4	ENSRNOG00000005689	-5.1583	ENSMUSG00000020171	1.03706	10.6	27.6	21.3	11.2	5.5	13.3	18.8
Lmcd1	ENSRNOG00000005690	-3.66479	ENSMUSG00000057604	2.07926	8.2	21.2	13	4.2	0.4	0.4	3.9
Ndufa5	ENSRNOG00000005698	-1.71628	ENSMUSG00000023089	0.537971	16.7	37	38.6	28.2	27.7	11	30.7
Nsg1	ENSRNOG00000005700	6.52896	ENSMUSG00000029126	3.34562	5.8	212.8	83.6	20.2	5.1	2.9	8
Arfgef1	ENSRNOG00000005703	0.379264	ENSMUSG00000067851	0.495957	9.1	11	10.5	8.8	3	1.5	13.9
Mmp16	ENSRNOG00000005708	3.47681	ENSMUSG00000028226	0.609485	2.5	8.9	27.4	4.5	0.4	0.1	0.1
Rbm7	ENSRNOG00000005710	0.851617	ENSMUSG00000042396	-0.224919	26.6	16.3	22.3	17.4	7.4	6.8	33.8
Ptprd	ENSRNOG00000005711	0.956019	ENSMUSG00000028399	-0.753018	6.2	14.3	18.6	64.8	47	1.1	6.9
Ccdc82	ENSRNOG00000005713	-1.61358	ENSMUSG00000079084	3.20343e-16	0.1	0.1	0.1	0.1	0.1	0.1	0.1
Map3k7	ENSRNOG00000005724	-0.218624	ENSMUSG00000028284	-0.224473	13.1	9.9	13.5	15	7.5	4.6	15.7
Pcmtd1	ENSRNOG00000005730	-0.0349344	ENSMUSG00000051285	0.303676	19.2	14.4	12.5	13.9	5.3	1.5	17.6
Cpsf2	ENSRNOG00000005733	-0.510251	ENSMUSG00000041781	0.366128	4.9	5.8	7.3	3.8	1.6	3.2	6.2
Eif1ax	ENSRNOG00000005736	1.88867	ENSMUSG00000067194	0.59306	22.4	40.2	38.1	30.5	22.8	9.1	37
Foxred2	ENSRNOG00000005749	-0.0270631	ENSMUSG00000016552	0.856265	4.4	3.5	4.7	1.4	0.3	0.6	0.2
Alg13	ENSRNOG00000005753	4.25086	ENSMUSG00000031286	0.415037	0.1	0.2	0.1	0.1	0.1	0.1	0.4
Alg13	ENSRNOG00000005753	4.25086	ENSMUSG00000041718	0.385025	3.7	3.7	5	2.7	1.8	0.7	3.1
Rab22a	ENSRNOG00000005762	1.02519	ENSMUSG00000027519	-0.640894	11.9	10.4	13.9	17.3	13.6	18.8	21.8
Arl1	ENSRNOG00000005763	1.97689	ENSMUSG00000060904	-0.0210059	7.6	12.5	14.2	15.1	7.4	11.1	20.7
Ap4s1	ENSRNOG00000005765	3.4379	ENSMUSG00000020955	0.327333	10.5	15.6	21.2	13.7	12.3	5.7	11.2
Phf14	ENSRNOG00000005775	0.590286	ENSMUSG00000029629	0.391021	14.1	13.9	14.6	9	3.5	4.8	17.6
Bcl11b	ENSRNOG00000005776	2.23987	ENSMUSG00000048251	5.32912	0.1	6.7	0.5	0.1	0.1	0.1	0.1
Cdk5rap2	ENSRNOG00000005788	4.14557	ENSMUSG00000039298	-1.62749	11.3	1.3	5.7	2.4	1.5	1.4	1.8
RGD1306474	ENSRNOG00000005790	0.853014	ENSMUSG00000020177	3.20343e-16	0.1	0.1	0.1	0.1	0.1	0.1	0.1
Aasdhppt	ENSRNOG00000005795	1.15484	ENSMUSG00000025894	0.123515	7.5	6.5	6.9	7.3	4.4	1.4	8.3
Ctnna1	ENSRNOG00000005796	-3.01399	ENSMUSG00000037815	-3.29649	42.7	4.1	10.1	25.7	31.5	14.8	116.9
Usp24	ENSRNOG00000005802	-0.576539	ENSMUSG00000028514	-0.472753	20.7	9.8	37.7	9.4	1.5	6.5	5.8
Eif3d	ENSRNOG00000005804	1.36733	ENSMUSG00000016554	-0.724415	24.4	25.4	49.6	39.7	30.9	52.2	55
Arhgdib	ENSRNOG00000005809	-3.42952	ENSMUSG00000030220	-5.46605	0.5	1.4	13.9	1.2	3.5	314.7	37.5
Utp20	ENSRNOG00000005823	4.11746	ENSMUSG00000004356	-0.328326	4	1.5	2.4	1.7	0.6	0.9	1.7
Lyz2	ENSRNOG00000005825	-3.13514	ENSMUSG00000069516	-6.26616	0.1	0.5	10.4	0.6	1.5	216.2	2.1
Lyz2	ENSRNOG00000005825	-3.13514	ENSMUSG00000069515	-4.23522	0.1	0.1	0.5	0.1	0.1	10.4	0.1
Skp1	ENSRNOG00000005828	1.28274	ENSMUSG00000036309	0.724408	64.9	148.7	124.8	124	87.6	31.2	107.5
Erp44	ENSRNOG00000005841	2.17045	ENSMUSG00000028343	-0.617594	22.4	13.6	26.8	22.7	12.7	9.2	31.4
Aco1	ENSRNOG00000005849	-2.23293	ENSMUSG00000028405	-1.29172	23.3	7.4	24.2	21.7	12	11.6	15.9
Gdap1	ENSRNOG00000005850	3.1338	ENSMUSG00000025777	3.18569	0.5	27.6	11.2	3.6	2.3	0.3	0.3
Slc30a6	ENSRNOG00000005856	2.16406	ENSMUSG00000024069	-0.523562	9.2	4	6.7	4.2	3.5	5.5	5.4
Lrrc3b	ENSRNOG00000005857	3.46933	ENSMUSG00000045201	5.39232	0.1	4.2	0.1	0.1	0.1	0.1	0.1
Ssfa2	ENSRNOG00000005865	-5.06077	ENSMUSG00000027007	-2.50877	26.4	2.7	22.3	11.8	2.4	14.8	14.5
Lrpprc	ENSRNOG00000005877	2.04427	ENSMUSG00000024120	0.790281	8.5	9.8	7	6.4	2.9	4.5	4.7
Tle1	ENSRNOG00000005882	2.17627	ENSMUSG00000008305	-0.0728629	13.5	7.4	4	5.5	6.1	1.5	16.1
Serbp1	ENSRNOG00000005890	0.658496	ENSMUSG00000036371	0.496985	17	33	29.9	20.4	9.9	18	45.1
Slc2a6	ENSRNOG00000005900	1.42162	ENSMUSG00000036067	1.43929	2.6	8	6.5	4.2	1.3	2.4	0.7
Cdc27	ENSRNOG00000005904	2.61334	ENSMUSG00000020687	0.269921	15.5	12.6	11.3	10	2.4	2.5	21
Pde4b	ENSRNOG00000005905	0.840323	ENSMUSG00000028525	-2.53227	90.4	7.9	29.2	33.5	31.5	8.1	81.5
Dmtf1	ENSRNOG00000005908	3.1554	ENSMUSG00000042508	0.0951145	24.6	12.8	15.5	13.2	3	3.3	12.3
Ppm1a	ENSRNOG00000005916	2.00008	ENSMUSG00000021096	0.483798	19.8	41.3	26	36.8	35.3	12.8	46.5
Mtmr2	ENSRNOG00000005923	1.94845	ENSMUSG00000031918	-0.97152	10.7	8.1	10.2	20.4	18.3	6.1	29.6
Dstn	ENSRNOG00000005924	-0.53298	ENSMUSG00000015932	-0.107226	48.8	121.4	114.5	212.3	151.3	36.7	221
Cpsf6	ENSRNOG00000005927	0.16751	ENSMUSG00000055531	0.998393	25.2	29.9	27.4	18.3	3.4	5.7	9.8
RGD1311744	ENSRNOG00000005960	-1.30316	ENSMUSG00000038112	4.49825	0.1	11.3	2.2	0.3	0.1	0.1	0.2
Rab2a	ENSRNOG00000005963	4.24242	ENSMUSG00000047187	0.81093	50.7	92.6	63.9	76.1	46.6	19.4	60
Nr4a3	ENSRNOG00000005964	-0.85212	ENSMUSG00000028341	0.911191	46.5	21	5.2	1.8	0.2	7.4	5.9
Irak4	ENSRNOG00000005965	-0.60912	ENSMUSG00000059883	-3.70044	0.7	0.1	1.2	1	0.9	2.6	1.4
Gpr176	ENSRNOG00000005971	-1.93891	ENSMUSG00000040133	0.628906	0.1	2.5	2.1	4.2	3.1	0.1	0.1
Nt5c3a	ENSRNOG00000005981	5.74129	ENSMUSG00000029780	1.14471	9.6	24.1	17.4	13.7	7.7	2.6	14.4
C1d	ENSRNOG00000005982	2.09028	ENSMUSG00000000581	0.796205	7.8	14.5	9.5	8.5	5.6	2.3	16.4
Etv6	ENSRNOG00000005984	-0.947504	ENSMUSG00000030199	-2.43423	4.8	1.4	6.3	10.3	2	9.2	12.8
Kcnma1	ENSRNOG00000005985	1.26102	ENSMUSG00000063142	1.33039	5.3	5.7	6.2	1.7	0.2	0.1	0.1
Suox	ENSRNOG00000005987	-1.03381	ENSMUSG00000049858	-0.874469	5.2	2.1	5	3.1	3.1	4	2.7
Arl8a	ENSRNOG00000005988	-1.49301	ENSMUSG00000026426	0.556418	81.1	115.1	84.6	120.8	98.3	69.4	15.4
Wdsub1	ENSRNOG00000005990	-0.0881773	ENSMUSG00000026988	-1.98272	6.1	1.4	3.5	6.9	4.2	4.6	7.9
Cdk12	ENSRNOG00000006000	-0.388891	ENSMUSG00000003119	0.371367	6.6	4.7	3.8	3.3	0.8	2.1	5.2
Luc7l2	ENSRNOG00000006001	0.625349	ENSMUSG00000029823	0.979612	48	44.5	25.1	23.8	12.6	5.5	20.4
Ctnna2	ENSRNOG00000006003	2.27135	ENSMUSG00000063063	1.18728	21.4	34.5	35.6	19.1	13.4	1	0.4
Phc2	ENSRNOG00000006004	-0.726607	ENSMUSG00000028796	-1.43937	20.9	16.9	27.9	54.8	66.2	39.4	65.8
G0s2	ENSRNOG00000006019	-4.51369	ENSMUSG00000009633	-3.339	30.2	2.1	57.2	13.5	3	20.9	2.7
Eif2ak4	ENSRNOG00000006027	-4.16892	ENSMUSG00000005102	-0.227667	7.6	3.9	5	3.8	1.3	2.9	6.8
Tubgcp6	ENSRNOG00000006028	3.28842	ENSMUSG00000051786	0.57842	6.1	5.5	5	2.8	1.7	3.8	2.7
Ptprz1	ENSRNOG00000006030	-7.68377	ENSMUSG00000068748	-2.49352	1021.1	45.5	416.6	94.5	2.7	1.7	0.8
Snap25	ENSRNOG00000006037	-0.153813	ENSMUSG00000027273	4.11209	2.1	146.7	27.1	6.3	9.8	3.6	2
Rfx1	ENSRNOG00000006049	0.945894	ENSMUSG00000031706	1.63029	4.7	9.7	3.9	3	0.5	5	1.7
Med19	ENSRNOG00000006050	0.017898	ENSMUSG00000027080	0.77365	5.9	10.4	10.9	6.8	4.8	3.2	4.9
Sulf2	ENSRNOG00000006052	4.45729	ENSMUSG00000006800	-2.50278	1.3	15.3	262.5	197.6	50.9	7.6	0.4
Matn2	ENSRNOG00000006060	3.55009	ENSMUSG00000022324	-0.431339	0.4	1.1	2.2	3.9	2.2	0.1	0.1
Phf21a	ENSRNOG00000006063	-1.11064	ENSMUSG00000058318	0.487049	12.3	8.9	8.8	5.9	3.6	3.2	4.3
Aifm1	ENSRNOG00000006067	3.79538	ENSMUSG00000036932	-0.26637	13.6	6	8.6	8.4	2.8	3	6.9
Tmem117	ENSRNOG00000006068	0.0509075	ENSMUSG00000063296	-1.65076	0.4	2.5	1	17.1	28.3	0.1	0.2
Eif2ak3	ENSRNOG00000006069	1.20641	ENSMUSG00000031668	-0.842048	6.7	4.5	11.8	11.3	5.5	3.1	10
Fez1	ENSRNOG00000006075	-0.842695	ENSMUSG00000032118	-1.32144	104.5	59.5	132.2	177.7	471.2	3.3	3.3
Snx5	ENSRNOG00000006077	0.762916	ENSMUSG00000027423	-2.03014	31	15	56.2	60.9	33.3	132.8	53.4
Lynx1	ENSRNOG00000006086	3.68573	ENSMUSG00000022594	0.279382	3.7	7.1	10.9	2.8	7.8	6	3.9
Rnf20	ENSRNOG00000006087	2.96407	ENSMUSG00000028309	-0.185323	18.7	10.7	15.1	12.7	7.8	5	13.7
LRRTM1	ENSRNOG00000006093	6.62686	ENSMUSG00000060780	0.559427	0.3	7	20.6	6.4	0.9	0.2	0.1
Pole4	ENSRNOG00000006102	0.686038	ENSMUSG00000030042	0.73192	12.9	22.2	16.6	8.6	4.3	14.2	23.6
Jph1	ENSRNOG00000006110	1.58676	ENSMUSG00000042686	0.667425	0.4	1.8	0.3	2	3	0.1	1
Hk2	ENSRNOG00000006116	-0.299732	ENSMUSG00000000628	-4.96	4.5	0.4	6.1	1.2	0.5	62.3	0.1
Klf10	ENSRNOG00000006118	3.64766	ENSMUSG00000037465	-0.916527	39.9	12.6	8.5	16.4	5.9	46.6	25.4
Slc7a15	ENSRNOG00000006119	-0.930622	ENSMUSG00000020600	3.20343e-16	0.1	0.1	0.1	0.1	0.1	0.1	0.1
Nup88	ENSRNOG00000006126	-1.74751	ENSMUSG00000040667	0.401825	14.2	15.7	14.3	13.1	6	8.9	14.8
Rab5b	ENSRNOG00000006130	0.057103	ENSMUSG00000000711	0.217175	12.1	32.2	29.7	33.6	32.2	26.9	31.7
Mettl2b	ENSRNOG00000006131	1.71665	ENSMUSG00000020691	0	3.8	3.9	5.1	4.2	3.7	2.1	4.5
Pdpk1	ENSRNOG00000006136	2.4278	ENSMUSG00000024122	1.14501	8.1	12.2	7.9	6.3	2.2	3.4	5.2
Arid1a	ENSRNOG00000006137	-0.745251	ENSMUSG00000007880	0.672797	18.7	18.2	11.6	13.2	3.8	14	7.2
Stx18	ENSRNOG00000006139	2.30828	ENSMUSG00000029125	-0.643856	8	5.6	9.9	6.8	6.4	7.6	13.8
Ngly1	ENSRNOG00000006143	5.22645	ENSMUSG00000021785	-0.384664	11	4.8	6.8	4.2	1.9	2	11.7
Cntn3	ENSRNOG00000006144	3.36556	ENSMUSG00000030075	3.41504	0.1	1.6	0.4	0.1	0.1	0.1	0.1
Trim54	ENSRNOG00000006146	3.0388	ENSMUSG00000062077	3.20343e-16	0.1	0.1	0.1	0.1	0.1	0.1	0.1
RGD1310352	ENSRNOG00000006148	1.43964	ENSMUSG00000036275	-0.421146	34.3	38.3	59.3	46.9	48	55.1	64.1
Dync1h1	ENSRNOG00000006178	2.36487	ENSMUSG00000018707	0.24041	22.6	32.9	32.6	45.3	31.2	15.2	20.2
Pum2	ENSRNOG00000006180	-1.16459	ENSMUSG00000020594	0.512246	20.8	29.5	28.5	19.2	8	7.9	39.7
Etaa1l1	ENSRNOG00000006185	4.53468	ENSMUSG00000016984	-0.29956	5.3	1.3	1.7	0.7	0.3	0.2	1.4
Calu	ENSRNOG00000006197	-1.43298	ENSMUSG00000029767	-0.873441	73.8	38.3	62.8	67.3	27.3	32	157.8
Slc30a3	ENSRNOG00000006204	4.4421	ENSMUSG00000029151	0.0186157	0.2	1.3	1.5	0.2	1.6	4.1	0.1
Tmem106b	ENSRNOG00000006206	2.2584	ENSMUSG00000029571	-0.221302	27.9	18.9	40.1	30.5	13.5	4.1	16.1
Mbd6	ENSRNOG00000006209	-1.02571	ENSMUSG00000025409	0.0991332	15.9	12.8	10.1	11	4.7	23.5	6.5
Wiz	ENSRNOG00000006217	2.37916	ENSMUSG00000024050	1.08854	6.2	16.8	9.5	10	7.7	9.1	4.9
Uba3	ENSRNOG00000006221	2.55441	ENSMUSG00000030061	0.259387	24.3	15.8	15	15.9	6.9	2.5	14.6
Cacng2	ENSRNOG00000006226	5.90157	ENSMUSG00000019146	4.98185	0.1	7.9	0.4	0.1	0.4	0.4	0.1
Ifih1	ENSRNOG00000006227	-3.73192	ENSMUSG00000026896	-0.415037	0.2	0.4	0.2	0.1	0.1	0.5	2.1
Pdia4	ENSRNOG00000006228	-1.63351	ENSMUSG00000025823	-1.83191	50.5	8.6	33.1	25.1	13.1	27.8	34.1
Ptpro	ENSRNOG00000006231	-3.12693	ENSMUSG00000030223	-1.2476	0.3	7.7	30.2	47.9	7.1	24	0.2
Nell2	ENSRNOG00000006235	-0.321285	ENSMUSG00000022454	1.33208	1.4	32.1	57.8	11.2	3.8	1.7	0.6
Gpr37l1	ENSRNOG00000006237	-4.06805	ENSMUSG00000026424	-3.6568	374	14.2	396.2	237	53.8	12.5	1.1
Lztfl1	ENSRNOG00000006244	6.3899	ENSMUSG00000025245	0.736966	2.7	4.5	3.6	3.7	1.8	0.4	4
Copa	ENSRNOG00000006247	0.632793	ENSMUSG00000026553	-0.263896	25.6	27.9	41.2	34.2	17.6	36.3	46.1
Trim37	ENSRNOG00000006248	-0.416628	ENSMUSG00000018548	1.44883	12	19.2	14.2	4.9	4.1	2.2	4.8
Fam83a	ENSRNOG00000006251	-0.625799	ENSMUSG00000051225	-0.222392	0.2	0.1	0.1	0.1	0.1	0.1	0.1
Papolg	ENSRNOG00000006261	3.43865	ENSMUSG00000020273	-0.0114048	3.3	2.1	4	1.8	0.5	0.6	2.5
Sh2d1a	ENSRNOG00000006263	3.52473	ENSMUSG00000005696	-0.222392	0.1	0.1	0.1	0.1	0.1	0.2	0.1
Itfg2	ENSRNOG00000006264	1.19329	ENSMUSG00000001518	0.498548	7.1	8.1	8.7	6.5	3.7	2.7	5.7
Tlk2	ENSRNOG00000006285	3.81446	ENSMUSG00000020694	0.300081	7.8	7.1	5.9	5.8	2.6	2.3	10.2
Cpne3	ENSRNOG00000006298	-0.832605	ENSMUSG00000028228	-0.305808	5.8	3.6	9	2.9	0.4	2.6	6
Gclc	ENSRNOG00000006302	1.57033	ENSMUSG00000032350	-0.774933	10.7	6	11.7	12.2	12.1	6.9	8
Mdm2	ENSRNOG00000006304	-5.80794	ENSMUSG00000020184	0.568284	16.8	21.5	14.4	23.3	11.7	4.9	15.9
Slc38a2	ENSRNOG00000006305	-2.50338	ENSMUSG00000022462	0.181305	40.7	105	73.8	69.5	38.5	35.1	298
Ptges	ENSRNOG00000006320	-5.23021	ENSMUSG00000050737	-2.86716	6.4	0.9	2.4	0.3	0.3	0.4	29.6
Trpc6	ENSRNOG00000006324	4.44798	ENSMUSG00000031997	2.80735	0.1	0.7	0.1	0.1	0.1	0.1	0.1
Wwp1	ENSRNOG00000006328	1.48315	ENSMUSG00000041058	-0.584963	7	3.3	6.2	5.9	3.8	1.4	5.4
Peli1	ENSRNOG00000006329	0.229123	ENSMUSG00000020134	0.0898606	19.1	20.7	12.9	42.9	12.2	10.8	18.8
Elovl5	ENSRNOG00000006331	1.22309	ENSMUSG00000032349	-1.19584	301.9	42.7	84.7	54.4	81.6	20.4	43.9
Txndc16	ENSRNOG00000006334	-0.829303	ENSMUSG00000021830	-1.04315	13.5	12.9	41.9	57.1	34.6	4.7	7.7
Klhl9	ENSRNOG00000006335	-3.00799	ENSMUSG00000070923	0.0584167	23.4	14.7	16.3	11.2	3.6	4.2	26
Fyco1	ENSRNOG00000006336	0.629427	ENSMUSG00000025241	-1.44746	4	1.1	2.2	2.4	2.5	0.7	6.2
Memo1	ENSRNOG00000006340	1.96574	ENSMUSG00000058704	0.0163018	21	17.8	18.4	15.6	12.5	12.8	25.3
Sec61b	ENSRNOG00000006345	2.96078	ENSMUSG00000053317	-0.723086	4.8	9.4	13.2	11.8	8.4	14.5	40.4
Akap8l	ENSRNOG00000006355	5.52572	ENSMUSG00000002625	0.214545	27.5	27.5	26.2	20.5	11.3	34.3	22.4
Sgip1	ENSRNOG00000006357	3.6969	ENSMUSG00000028524	2.71583	16.1	36.9	8.3	5.9	2.7	0.3	0.4
Galk1	ENSRNOG00000006359	2.33735	ENSMUSG00000020766	-0.0553271	4.4	8.1	8.8	8.1	9.8	10.2	9.2
Dld	ENSRNOG00000006364	0.819775	ENSMUSG00000020664	0.341715	32.8	26	31.4	22.4	8.9	5.7	21.9
Lrrn3	ENSRNOG00000006368	-3.43484	ENSMUSG00000036295	-0.282202	3.6	5.4	22.7	10.7	1.4	0.1	0.9
Alg2	ENSRNOG00000006369	2.64551	ENSMUSG00000039740	1.45346	21.4	48.2	33.2	27.8	10.3	5.5	7.4
Vdac1	ENSRNOG00000006375	1.00958	ENSMUSG00000020402	1.16516	75	147.3	91.7	65.9	44.9	44.4	72.2
Srsf6	ENSRNOG00000006380	-2.05498	ENSMUSG00000016921	-0.00575927	110.8	62.5	65.5	73.8	22	57.2	47.2
Smarcad1	ENSRNOG00000006391	-2.89577	ENSMUSG00000029920	0.552119	10.2	7.6	8	4.5	0.9	1.3	6.2
Xrcc6	ENSRNOG00000006392	3.62719	ENSMUSG00000022471	-0.84944	7.5	3.7	11.7	7.5	6.8	2.9	3.6
Sirt6	ENSRNOG00000006393	3.68117	ENSMUSG00000034748	0.736966	6.1	7	5.7	4	2	3.5	3.9
Tbc1d10a	ENSRNOG00000006394	2.50349	ENSMUSG00000034412	-2.13041	46	8.5	5.7	1.6	1.9	160.7	7.4
Synj2bp	ENSRNOG00000006399	1.52083	ENSMUSG00000090935	0.0230836	1.8	2.1	2	1.4	1.4	0.9	4.9
Tbc1d14	ENSRNOG00000006400	-5.15617	ENSMUSG00000029192	-1.19418	9.2	16.6	36.2	54.5	50.4	32.6	45
Zhx1	ENSRNOG00000006412	0.89961	ENSMUSG00000022361	-0.23725	13.9	6.9	10.1	5.8	2.6	1.6	14.8
Aven	ENSRNOG00000006419	-0.932338	ENSMUSG00000003604	-1.10535	2.1	2.2	4.6	5	3.7	6	7
Syt1	ENSRNOG00000006426	3.49055	ENSMUSG00000035864	5.55577	0.8	122.3	8.4	1.4	3.1	1	0.9
LOC100911093	ENSRNOG00000006432	2.93862	ENSMUSG00000013736	-0.278246	10.6	7.6	9.1	15.7	11.4	1.4	7.1
Tor1b	ENSRNOG00000006435	0.790111	ENSMUSG00000026848	-1.21205	12.8	6	22.2	14.3	7	15.5	11.6
Ift27	ENSRNOG00000006440	-1.93213	ENSMUSG00000016637	0.263034	10.4	12.7	17.9	9.1	10.7	7.8	7.6
Fkbp4	ENSRNOG00000006444	0.93478	ENSMUSG00000030357	0.340594	19.6	47	60.9	35.4	27.1	38.4	41.3
Erbb2	ENSRNOG00000006450	0.849913	ENSMUSG00000062312	-1.926	8.3	0.5	0.3	0.1	0.1	0.1	2.5
Amdhd2	ENSRNOG00000006460	1.59108	ENSMUSG00000036820	-1.35677	3.6	3	4.2	6.8	5.8	15.1	10.6
Ero1l	ENSRNOG00000006462	3.70653	ENSMUSG00000021831	0.612042	7.7	12.1	10.7	10.6	5.2	2.4	10.9
Eif2b2	ENSRNOG00000006467	5.47179	ENSMUSG00000004788	-0.137961	14.4	19.1	18.3	17.2	21.5	16.4	38.3
Camk1g	ENSRNOG00000006470	1.81477	ENSMUSG00000016179	2.25432	2	6.6	4.5	0.7	0.3	0.7	0.1
Pvalb	ENSRNOG00000006471	-0.526849	ENSMUSG00000005716	-3.1964	0.1	0.1	0.6	1.4	2.3	0.9	0.2
Hspa2	ENSRNOG00000006472	1.26028	ENSMUSG00000059970	-1.2338	16.9	3.6	4.9	13.6	9.5	1.7	4.2
Heatr5a	ENSRNOG00000006483	-2.14038	ENSMUSG00000035181	-2.47524	3.4	1.1	4.1	8	6	8.5	6.7
Topors	ENSRNOG00000006485	1.26455	ENSMUSG00000036822	-0.497931	21.8	9.3	11.1	7.6	2	4	32.3
Casp8ap2	ENSRNOG00000006487	1.99709	ENSMUSG00000028282	-0.321928	5.2	1.6	2.3	1.5	0.2	0.2	2.6
Neo1	ENSRNOG00000006490	2.75347	ENSMUSG00000032340	-0.361213	39.3	25.6	38.1	81.5	29.8	1.4	7.2
Cops5	ENSRNOG00000006499	5.6209	ENSMUSG00000025917	-0.0282289	28.2	38.8	46.4	61.3	42.2	15.6	43.7
Snf8	ENSRNOG00000006500	2.2256	ENSMUSG00000006058	-0.538814	4.2	6	9.8	10.1	10.6	10.6	7
Srgap3	ENSRNOG00000006509	-6.20746	ENSMUSG00000030257	2.88362	26.1	61.5	12.1	6.6	4	1	0.2
Vezt	ENSRNOG00000006514	3.06505	ENSMUSG00000036099	0.606024	7.7	6.9	6.9	3.9	2.3	1.8	4.6
Tmem107	ENSRNOG00000006519	-5.27852	ENSMUSG00000020895	0.888969	2.1	2.5	2	0.8	0.8	0.5	1.9
Atl2	ENSRNOG00000006523	1.47269	ENSMUSG00000059811	-0.684971	60.6	11.3	7.8	3.5	1	6.1	30
Sema3c	ENSRNOG00000006526	-0.134689	ENSMUSG00000028780	1.70922	0.4	10.3	0.4	0.2	0.1	0.1	17.7
Slc6a1	ENSRNOG00000006527	-1.11118	ENSMUSG00000030310	0.183918	424.7	129.5	144.7	87.7	23	3.2	0.7
Crbn	ENSRNOG00000006534	1.38428	ENSMUSG00000005362	0.49078	9.3	12.6	12.8	8.7	6.5	2.8	13.7
Pex16	ENSRNOG00000006539	1.87143	ENSMUSG00000027222	0.229331	8.7	11	9	9.1	11	7.4	11.1
Atp6v0c	ENSRNOG00000006542	0.604458	ENSMUSG00000024121	0.862496	2.9	16	10.2	10.6	7.1	17	5
Mrc2	ENSRNOG00000006548	-6.38529	ENSMUSG00000020695	-1.80735	0.9	0.4	2.2	0.1	0.1	3.6	1.5
Dcaf15	ENSRNOG00000006551	2.74523	ENSMUSG00000037103	0.464333	17.4	17.2	16.8	12.6	7.2	12	8.8
Fam149b1	ENSRNOG00000006554	0.824641	ENSMUSG00000039599	0.343612	8.4	8.1	8.2	5.8	3.4	3.8	8.7
Cyfip2	ENSRNOG00000006557	-0.466931	ENSMUSG00000020340	0.499983	2.6	34.2	36.5	91.4	11.5	2.4	0.7
Akap8	ENSRNOG00000006559	0.134598	ENSMUSG00000024045	1.05484	28.8	28.6	18	13.1	3	6.6	13.1
Fstl4	ENSRNOG00000006565	-0.249535	ENSMUSG00000036264	3.42146	0.1	2.5	0.9	0.1	0.1	0.1	0.1
Plekhg3	ENSRNOG00000006570	-2.22819	ENSMUSG00000052609	-5.76377	1.1	0.1	1.9	14	14.3	0.6	0.7
Bms1	ENSRNOG00000006576	-0.933399	ENSMUSG00000030138	0.172837	13.2	6.2	6.4	3.6	1.4	2.5	5.9
Aptx	ENSRNOG00000006582	1.83675	ENSMUSG00000028411	0.169925	2.8	2.7	2.7	3	2.8	1.8	1.3
Hpgds	ENSRNOG00000006583	-4.69447	ENSMUSG00000029919	-3.24793	0.1	0.3	3.5	0.1	0.1	13.2	0.1
LOC100910833	ENSRNOG00000006587	2.93968	ENSMUSG00000056770	-0.0431859	16.1	18.1	12.8	18.9	30.9	15.7	17.5
Fam163b	ENSRNOG00000006591	5.17994	ENSMUSG00000009216	3.36457	0.2	10.3	1.5	0.3	1.7	2.1	0.2
Grpel1	ENSRNOG00000006593	-3.0455	ENSMUSG00000029198	-0.217418	4.4	8.3	8.9	9.5	7	8.9	19.2
Htr3a	ENSRNOG00000006595	-0.353359	ENSMUSG00000032269	5.35755	0.1	4.1	0.1	0.1	0.1	0.1	0.1
Unk	ENSRNOG00000006600	-6.49908	ENSMUSG00000020770	0.36257	10.8	9	8.9	6.9	2.7	8.8	3.9
Thy1	ENSRNOG00000006604	2.64389	ENSMUSG00000032011	3.23651	7.5	77.6	13.2	2.8	12.1	11.5	2.3
Tmem70	ENSRNOG00000006608	0.85707	ENSMUSG00000025940	0.572435	7.4	8.6	8.1	5.6	3.6	3	7
Mtap	ENSRNOG00000006615	1.34199	ENSMUSG00000062937	-1.95936	5	2.1	10	15.6	1.8	2.8	13.8
Dnajc9	ENSRNOG00000006619	0.898915	ENSMUSG00000021811	0.696384	8	14.8	18.1	8.9	6.6	3.7	9.5
Cry1	ENSRNOG00000006622	-1.4026	ENSMUSG00000020038	-0.552098	11.8	7.4	8.6	9.2	3.6	24.1	7.8
Cd302	ENSRNOG00000006623	-2.14635	ENSMUSG00000060703	-1.3397	11.3736	4.7	27.5	5.3	1.1	16.6	9.5
Rps6ka3	ENSRNOG00000006632	-0.718979	ENSMUSG00000031309	-0.830719	7.2	7	8.2	3	0.9	5.7	49.7
Yipf6	ENSRNOG00000006642	-1.04627	ENSMUSG00000047694	0.225258	11.2	9.8	12.6	14.3	3	2	7.2
Kdm4c	ENSRNOG00000006644	-0.588296	ENSMUSG00000028397	-0.506536	8.6	4.2	7.2	5.5	1.6	1.5	11.4
Ryr3	ENSRNOG00000006645	2.72993	ENSMUSG00000057378	0.584963	0.1	0.9	2.6	0.6	0.1	0.1	0.1
Vopp1	ENSRNOG00000006646	2.58823	ENSMUSG00000037788	1.92296	10.9	39.5	22.4	9.3	3.2	2.7	14
Thrb	ENSRNOG00000006649	2.4363	ENSMUSG00000021779	0.378512	2.5	1.3	2.6	0.5	0.2	0.1	0.1
Ddx1	ENSRNOG00000006652	1.35174	ENSMUSG00000037149	-0.412041	24.5	24.1	53.2	49.3	29.6	9.2	26.6
Plrg1	ENSRNOG00000006655	-2.69575	ENSMUSG00000027998	-0.180909	12.7	12.6	20	14.5	10.9	11.3	16.3
Usp2	ENSRNOG00000006663	1.85161	ENSMUSG00000032010	-0.0995357	31.8	15.4	13.7	7.8	2.6	42.7	0.4
Rai2	ENSRNOG00000006670	0.160025	ENSMUSG00000043518	3.38466	0.1	4.7	1.9	0.4	0.1	0.1	0.1
Rdh10	ENSRNOG00000006681	-0.946405	ENSMUSG00000025921	-0.264062	8.2	3.9	7.6	2.7	1.1	2.9	5.6
Chd7	ENSRNOG00000006689	-3.76202	ENSMUSG00000041235	0.139652	8.6	5.6	8.8	6	1.3	3.3	2.5
Rbck1	ENSRNOG00000006695	1.55162	ENSMUSG00000027466	-0.51275	19	19.8	21.7	29.4	26.3	43	30.1
Tmem55a	ENSRNOG00000006697	-1.40125	ENSMUSG00000028221	0.512554	23.8	17	20.7	9.4	2.2	4.6	10.8
Rab33a	ENSRNOG00000006698	1.68847	ENSMUSG00000031104	-1.74223	2.9	8.2	7.5	77.2	76.1	0.6	0.3
Mlh3	ENSRNOG00000006699	0.782122	ENSMUSG00000021245	-0.194647	2.1	1.5	2.3	2.2	1.3	0.3	2.1
Wdyhv1	ENSRNOG00000006700	2.23532	ENSMUSG00000022359	-0.0238467	5.7	4	5.3	2.6	2.2	5.2	3.4
Zfp398	ENSRNOG00000006703	4.74997	ENSMUSG00000062519	0.799087	4.1	2.9	2.3	1.6	0.4	0.8	0.8
Mkks	ENSRNOG00000006705	1.92741	ENSMUSG00000027274	-0.731982	3.9	2.9	6.9	5.3	4.2	1.7	6.9
Ankrd26	ENSRNOG00000006717	3.30063	ENSMUSG00000007827	-0.174029	3.4	1.3	2.5	1.4	0.7	0.2	0.6
Rnpep	ENSRNOG00000006720	2.73157	ENSMUSG00000041926	-1.32387	13.4	9.9	17.5	18.4	12.3	44.1	43
Zfp9	ENSRNOG00000006726	0.892795	ENSMUSG00000072623	1.16993	1.7	3.6	2.9	2.4	1	0.1	1.5
Srgap2	ENSRNOG00000006733	-6.95463	ENSMUSG00000026425	-0.188618	14.7	14.2	9.9	3.7	2.8	43.8	22.2
Acyp1	ENSRNOG00000006744	4.27813	ENSMUSG00000008822	-0.375867	4.6	7	6.2	11.5	14	2.9	15.3
Cc2d1a	ENSRNOG00000006747	1.08182	ENSMUSG00000036686	1.67935	6.8	15	5.8	3.2	1.8	7.2	3.3
Tmtc3	ENSRNOG00000006749	1.06783	ENSMUSG00000036676	0.164631	7	3.4	4.1	1.9	0.3	0.4	4.5
Psmd6	ENSRNOG00000006751	-0.390229	ENSMUSG00000021737	0.174295	30.6	37.2	46	40.6	22.9	15.8	41.9
Maged1	ENSRNOG00000006756	0.086075	ENSMUSG00000025151	1.12604	66.1	207.2	215.9	138.9	37.3	52.9	58.5
Ankrd24	ENSRNOG00000006759	-1.93213	ENSMUSG00000054708	2.152	2.7	6	1.6	1.3	0.8	0.7	1
Sh3gl2	ENSRNOG00000006761	1.7595	ENSMUSG00000028488	3.05799	5.2	53.3	15.1	10.2	5.7	1.6	0.6
Rbm18	ENSRNOG00000006763	-2.00516	ENSMUSG00000026889	0.229011	18.9	17.6	17.9	16.5	7	6.1	23.7
Laptm4b	ENSRNOG00000006766	-2.07185	ENSMUSG00000022257	-2.30378	17.4	6.4	45.9	38.2	29.1	15	44
Brd4	ENSRNOG00000006770	2.92084	ENSMUSG00000024002	0.98626	13.6	20.9	10.2	10.6	3.8	13.1	12
Smyd1	ENSRNOG00000006776	-0.247132	ENSMUSG00000055027	-1.05889	1.5	0.2	0.3	0.2	0.3	0.1	0.1
Crot	ENSRNOG00000006779	-2.00836	ENSMUSG00000003623	-1.55117	43.7	4.8	17	6.6	3	5.2	8.9
Neb	ENSRNOG00000006783	2.00369	ENSMUSG00000026950	1.58496	0.1	0.3	0.1	0.1	0.1	0.1	0.1
Sema4f	ENSRNOG00000006784	1.08683	ENSMUSG00000000627	1.02129	0.1	9.1	4.9	16.5	4.9	0.4	0.1
Dcaf8	ENSRNOG00000006785	5.94347	ENSMUSG00000026554	-0.215268	28.1	20.3	24.1	21.7	22.6	20.5	24.4
Dhcr24	ENSRNOG00000006787	0.484963	ENSMUSG00000034926	-1.52997	76.8	35.8	38.9	241.4	253.6	3.7	5.9
Ddit3	ENSRNOG00000006789	3.67736	ENSMUSG00000025408	-0.860954	42.4	15.6	11.8	23.5	17.2	52.2	22.9
Cep57	ENSRNOG00000006792	1.23502	ENSMUSG00000031922	-0.100604	12.3	6	9.4	4.3	1.1	1.3	10.2
Lrrn1	ENSRNOG00000006802	-4.46578	ENSMUSG00000034648	-2.27423	2.8	8.2	99.8	71.4	63.4	0.1	0.5
Dnajc10	ENSRNOG00000006803	-0.0220649	ENSMUSG00000027006	-0.888503	11.8	9.3	13.3	8	4.1	4.2	61.9
Sumf1	ENSRNOG00000006813	-1.11354	ENSMUSG00000030101	-1.09374	4.5	3.6	8.3	4.7	1.8	16.1	10.7
Ubr5	ENSRNOG00000006816	0.958167	ENSMUSG00000037487	1.17688	47.4	36.4	14.4	12.4	4.1	4.9	13.4
Arl6ip5	ENSRNOG00000006818	3.98388	ENSMUSG00000035199	-0.792091	31.3	45.7	77.8	70.4	52.8	93.2	149.3
Hdac11	ENSRNOG00000006824	4.27781	ENSMUSG00000034245	1.60865	5.9	61.4	17.5	25.6	57.2	13.5	1.1
Pgr	ENSRNOG00000006831	2.90559	ENSMUSG00000031870	3	0.3	1.6	0.5	0.1	0.1	0.1	0.1
Zdhhc5	ENSRNOG00000006832	-0.300846	ENSMUSG00000034075	0.101445	8.6	10.8	11.8	6.7	3.1	16.9	13.3
Rb1cc1	ENSRNOG00000006833	1.72023	ENSMUSG00000025907	0.877143	6.1	7.5	5.9	3.9	1	0.5	7.1
Arl5a	ENSRNOG00000006839	-1.64844	ENSMUSG00000036093	-0.570463	7.2	10	14.4	25.1	10.6	2.5	29.3
Ano4	ENSRNOG00000006841	0.859713	ENSMUSG00000035189	-1.47999	0.1	1.9	5.2	12.8	13.2	0.1	0.4
Dnajc14	ENSRNOG00000006844	-0.150898	ENSMUSG00000025354	-0.287866	6.5	8	9.5	9.2	11.8	10	11.6
Ovol2	ENSRNOG00000006850	1.7385	ENSMUSG00000037279	0.584963	0.1	0.2	0.1	0.1	0.2	0.2	0.1
Elavl2	ENSRNOG00000006853	0.703606	ENSMUSG00000008489	5.23767	0.8	32.7	2.9	0.7	0.4	0.1	0.3
Insig1	ENSRNOG00000006859	2.34027	ENSMUSG00000045294	-0.503223	266.6	70.4	80.3	104.5	58.3	61.4	27.6
Scaper	ENSRNOG00000006864	2.81376	ENSMUSG00000034007	1.04891	5.6	7	5.6	2.8	1.1	0.6	4.6
Laptm4a	ENSRNOG00000006865	-3.56989	ENSMUSG00000020585	-0.964442	155.7	86.6	210.9	89.2	35.7	166.3	356.1
Etv1	ENSRNOG00000006867	2.94172	ENSMUSG00000004151	0.429251	4.3	6.8	13.8	4.4	5.3	2	0.5
Ube2z	ENSRNOG00000006868	1.8036	ENSMUSG00000014349	0.441543	8.4	17.7	12.5	7.4	5.9	22.4	21.6
Mtdh	ENSRNOG00000006870	4.85813	ENSMUSG00000022255	-0.518268	30.7	18.2	34.6	29.8	9	28	24.3
Slc25a14	ENSRNOG00000006871	3.63384	ENSMUSG00000031105	1.04679	5.4	9.4	8.7	5.5	3.4	1.7	2.6
Efnb1	ENSRNOG00000006877	3.94006	ENSMUSG00000031217	-0.0882272	7.2	3.7	4.2	1	0.8	7.6	2.8
Ppm1k	ENSRNOG00000006893	-1.0522	ENSMUSG00000037826	-0.305249	8.3	2.9	6.4	3.3	1.3	0.5	1.7
Tor1a	ENSRNOG00000006894	0.085068	ENSMUSG00000026849	-0.239466	12.3	13.2	18.4	13.8	10.4	18.7	19.9
Vps53	ENSRNOG00000006895	0.146312	ENSMUSG00000017288	0.365284	5.5	11.4	11.7	11.5	9.4	6.4	8.6
Cd320	ENSRNOG00000006901	2.68533	ENSMUSG00000002308	-2.15437	9.68668	3.5	9.7	8.4	8.5	4.9	52.3
Hectd1	ENSRNOG00000006905	5.56885	ENSMUSG00000035247	-0.0281635	14.7	9.3	9	6.3	1.7	2.8	22.4
Pou3f2	ENSRNOG00000006908	-3.30857	ENSMUSG00000095139	0.635003	19.1	6.6	5	1.1	0.1	0.1	0.1
Rpain	ENSRNOG00000006913	4.87008	ENSMUSG00000018449	-0.549258	9.5	5	7.7	4.7	3.5	8	10.5
Sardh	ENSRNOG00000006916	-2.982	ENSMUSG00000009614	-2.09217	14.8	1.2	3.2	1.4	1	6.1	4.2
Zfp786	ENSRNOG00000006925	-0.378479	ENSMUSG00000051499	1.20645	0.3	0.5	0.4	0.3	0.1	0.1	0.1
Eepd1	ENSRNOG00000006931	1.4918	ENSMUSG00000036611	-1.47592	31.3	2.9	1.6	0.4	0.8	12.5	1.8
Acvr1b	ENSRNOG00000006934	5.91741	ENSMUSG00000000532	1.85626	4.4	17.5	12.3	5	1.3	5.7	0.3
Ndufa7	ENSRNOG00000006939	-4.71941	ENSMUSG00000041881	-0.479109	35.3	53.4	70	78.6	91.6	74.2	96.9
Thumpd3	ENSRNOG00000006941	6.54945	ENSMUSG00000030264	-0.67423	10.7	4.7	8	11.4	4.9	4	6
Pdhx	ENSRNOG00000006947	6.82476	ENSMUSG00000010914	0.147933	12.8	11.8	11.8	17.8	9.8	4.1	7.6
C1qbp	ENSRNOG00000006949	3.49739	ENSMUSG00000018446	0.0420418	20.3	38.3	39.6	61.8	23.6	49.9	28
Prex1	ENSRNOG00000006952	0.440149	ENSMUSG00000039621	-2.6517	78.6	8.8	73.2	53.1	20.6	87.6	18.7
Adamtsl1	ENSRNOG00000006956	2.16653	ENSMUSG00000066113	1.58496	0.1	0.4	0.2	0.1	0.2	0.1	0.1
Gria4	ENSRNOG00000006957	4.65766	ENSMUSG00000025892	0.982618	0.2	22	37.7	23.3	5.1	0.1	0.4
Zfp12	ENSRNOG00000006958	-1.11352	ENSMUSG00000029587	0.875304	3.5	4.8	4.6	2.8	1.1	1.4	2.3
Snrpb	ENSRNOG00000006961	-1.07729	ENSMUSG00000027404	-0.508464	37.1	56.8	79	68.3	37.3	122.5	140.6
Stk32c	ENSRNOG00000006962	1.10434	ENSMUSG00000015981	2.71329	0.2	14.1	3.6	3.9	2.7	1.9	0.6
Aff4	ENSRNOG00000006965	-0.631175	ENSMUSG00000049470	1.25972	22.1	34.8	18.2	15.2	4.4	5.9	21.4
Nfia	ENSRNOG00000006966	-2.99414	ENSMUSG00000028565	0.962032	19.3	15	12.1	4.1	1.3	2.6	6.8
RGD1307947	ENSRNOG00000006973	0.181267	ENSMUSG00000046567	-0.462001	7.6	3.4	6.7	6.2	4.3	0.3	3
Wasl	ENSRNOG00000006975	2.2364	ENSMUSG00000029684	0.142493	16.5	14	18.2	14.6	4.9	5.7	16.2
Med6	ENSRNOG00000006976	-0.610627	ENSMUSG00000002679	-0.0278342	8.9	7.7	10.5	6.9	4.4	3.7	12.7
Hpca	ENSRNOG00000006979	-0.325465	ENSMUSG00000028785	3.0911	0.8	46.3	9	1.9	9.1	10.1	1.7
Nr2c1	ENSRNOG00000006983	-2.88369	ENSMUSG00000005897	-0.59136	4.5	2.5	5.2	4.4	2.8	1.7	4
Mapk11	ENSRNOG00000006984	5.00129	ENSMUSG00000053137	1.33949	2.1	6.2	2.4	0.4	0.6	2	7.2
RGD1304624	ENSRNOG00000006986	2.74458	ENSMUSG00000062198	-0.497187	8.3	3.2	5.8	5.6	2.3	1.8	3.3
Vamp2	ENSRNOG00000006989	2.31812	ENSMUSG00000020894	1.97152	75.5	285.9	94.1	88.8	101.8	60.1	17.1
Rpl7	ENSRNOG00000006992	-0.144335	ENSMUSG00000043716	-1.10134	18.6	35.5	55.6	51.3	56.4	101.5	173.6
Ano6	ENSRNOG00000006995	0.675217	ENSMUSG00000064210	-0.225067	9.9	7.7	9.3	2.5	0.3	8.3	23.7
App	ENSRNOG00000006997	0.885113	ENSMUSG00000022892	0.398172	58	307.1	139.4	467.8	376.3	36.6	320.1
Wdr78	ENSRNOG00000006999	2.67067	ENSMUSG00000035126	0.830075	1.6	0.8	0.2	0.2	0.2	0.2	0.3
Slc3a1	ENSRNOG00000007006	3.23566	ENSMUSG00000024131	1.58496	0.1	0.3	0.1	0.1	0.1	0.1	0.1
Cnksr2	ENSRNOG00000007014	1.96263	ENSMUSG00000025658	3.51785	0.1	4.2	1.2	0.3	0.3	0.2	0.1
Mapkbp1	ENSRNOG00000007018	6.26828	ENSMUSG00000033902	0.971145	7.5	9.9	5.1	3	1.3	1.7	11.7
Galm	ENSRNOG00000007023	-0.500338	ENSMUSG00000035473	-2.5025	1.3	0.2	0.5	0.1	0.1	4.1	0.7
Hgf	ENSRNOG00000007027	3.56942	ENSMUSG00000028864	-2.80735	28.3	0.7	0.7	0.1	0.1	0.1	0.1
Dnaja1	ENSRNOG00000007029	4.00064	ENSMUSG00000028410	1.35147	3.8	11.1	5.7	6.5	3.7	1.4	5
Trim9	ENSRNOG00000007031	2.32235	ENSMUSG00000021071	-0.770679	232.6	25.8	21.8	3.7	3.2	2.3	0.5
Amigo2	ENSRNOG00000007032	0.971609	ENSMUSG00000048218	1.26976	6	4.3	2	0.4	0.3	0.6	1.4
Sorcs2	ENSRNOG00000007033	7.03461	ENSMUSG00000029093	-1.04036	53.2	4.7	2.9	0.5	0.6	0.5	0.3
Hipk2	ENSRNOG00000007034	-6.11611	ENSMUSG00000061436	-0.804449	10.5	7.1	11.5	28.7	16.7	4.5	2.5
Tgfbr1	ENSRNOG00000007036	-6.80827	ENSMUSG00000007613	-2.32974	9.8	4.3	22.7	9.3	2.1	77.5	8.3
Timm17a	ENSRNOG00000007040	2.89162	ENSMUSG00000062580	-0.289914	11.9	16.1	15.9	31.5	28.4	8.7	21.7
Abcg2	ENSRNOG00000007041	-8.70332	ENSMUSG00000029802	-3.9247	1.4	1.7	14.3	4.4	1.8	12.9	120.1
RGD1305089	ENSRNOG00000007043	-3.34499	ENSMUSG00000021023	-0.59561	2.8	1.5	2.2	2.3	0.9	0.8	4.6
Eps8	ENSRNOG00000007047	-2.7542	ENSMUSG00000015766	-1.58696	27.5	4	22.8	15.5	1.2	3.6	1.5
Bcl11a	ENSRNOG00000007049	7.68554	ENSMUSG00000000861	6.26159	0.8	60.1	1.7	0.4	0.9	0.6	0.3
Rraga	ENSRNOG00000007051	3.63962	ENSMUSG00000070934	0.780317	37	53.3	46.8	31.1	18.3	16.9	36.1
Med7	ENSRNOG00000007053	1.14053	ENSMUSG00000020397	-0.857556	17	3.9	7.2	4.2	3	5.6	5.4
Atp1b4	ENSRNOG00000007059	-0.70639	ENSMUSG00000016327	3.20343e-16	0.1	0.1	0.1	0.1	0.1	0.1	0.1
Zfp746	ENSRNOG00000007064	0.975055	ENSMUSG00000057691	0.303392	6	5.8	7	4.6	2	3.8	4.8
Adhfe1	ENSRNOG00000007069	0.853014	ENSMUSG00000025911	-2.66838	21.7	0.7	2.7	1.4	0.5	0.3	0.1
Fem1b	ENSRNOG00000007077	-0.17859	ENSMUSG00000032244	1.54044	9.3	35.1	15.5	17.2	8.1	9.7	12.6
Gpn2	ENSRNOG00000007083	5.56702	ENSMUSG00000028848	-1.19485	6	3.4	6.4	8.9	8.1	9.6	7.7
Xpot	ENSRNOG00000007088	1.0399	ENSMUSG00000034667	0.255559	8.1	7.7	9.7	7.2	1.7	4.7	7.3
Lgmn	ENSRNOG00000007089	-3.52305	ENSMUSG00000021190	-4.08001	42.9	23.6	104.2	148.6	127.9	1931.2	40
Cacna1c	ENSRNOG00000007090	5.55533	ENSMUSG00000051331	2.29866	0.4	8.2	6.5	2.3	0.4	0.1	0.3
Ly6e	ENSRNOG00000007091	-2.09212	ENSMUSG00000022587	-2.32804	2.9	26.7	41.5	6.7	6.7	460.1	286.5
Gtpbp10	ENSRNOG00000007098	1.83675	ENSMUSG00000040464	0.219313	2.3	1.3	1.3	0.8	0.4	0.2	1.7
S100pbp	ENSRNOG00000007099	4.71465	ENSMUSG00000040928	0.781501	6.4	5.3	3.9	2.2	0.7	1.8	3.5
Ccdc136	ENSRNOG00000007100	3.76229	ENSMUSG00000029769	2.03103	15.3	14.1	1.2	0.3	0.9	0.6	2.4
Acss1	ENSRNOG00000007102	-4.7374	ENSMUSG00000027452	-2.40939	61.4	3.2	18	5.5	1.3	15.6	0.2
Itpr1	ENSRNOG00000007104	-2.57427	ENSMUSG00000030102	-0.928107	0.4	1.2	2.5	0.4	0.5	0.7	9.2
Sos1	ENSRNOG00000007106	1.48486	ENSMUSG00000024241	1.05123	5.4	8.6	4.4	4.5	2.1	0.9	7.6
Ankrd6	ENSRNOG00000007110	-2.58872	ENSMUSG00000040183	-0.158262	9.9	4.6	14.8	4.1	0.3	0.1	1.6
Nrd1	ENSRNOG00000007111	1.74487	ENSMUSG00000053510	-0.330541	20.2	16.7	17.9	30.3	18.4	11.6	27.6
Psma6	ENSRNOG00000007114	-0.557277	ENSMUSG00000021024	-0.217701	33.9	52.8	65.2	56.5	46.4	44.4	122
Crebl2	ENSRNOG00000007115	-0.00701765	ENSMUSG00000032652	-0.0817941	2.9	2	3.4	2.2	1.6	1.3	1.3
Cluap1	ENSRNOG00000007117	-3.18108	ENSMUSG00000014232	0.722466	6	7.7	6.3	4.1	3.6	3	5
Mtmr3	ENSRNOG00000007120	2.08923	ENSMUSG00000034354	0.129768	11.9	15.5	16.6	16	5.1	18	17.4
Krcc1	ENSRNOG00000007124	-0.845981	ENSMUSG00000053012	-2.1838	11.1	2.3	9	11.9	9.9	4	16.8
Vps54	ENSRNOG00000007125	0.811378	ENSMUSG00000020128	0.0175941	8	5.5	6.6	5.3	2	2.7	8
Bbs5	ENSRNOG00000007127	4.92286	ENSMUSG00000063145	1.02308	3.1	4.2	3.1	1.9	1.3	0.4	2.6
Nop56	ENSRNOG00000007128	2.70648	ENSMUSG00000027405	0.81283	14	23.1	20.1	17	6.8	13.3	7.7
Paxip1	ENSRNOG00000007131	7.05919	ENSMUSG00000002221	0.383329	4.7	5.5	6.7	5.3	3	2.3	3.3
Plxnb2	ENSRNOG00000007133	-3.07114	ENSMUSG00000036606	-1.2546	22.7	17.4	32.7	7.5	1.9	180	4.3
Strap	ENSRNOG00000007134	0.864435	ENSMUSG00000030224	0.238984	35.1	46.4	55.5	57.7	23.7	17.5	46.4
Anxa7	ENSRNOG00000007136	0.707878	ENSMUSG00000021814	0.0207586	3.6	10.5	5.4	3.2	2.4	9.3	38.2
B3gat1	ENSRNOG00000007142	2.07586	ENSMUSG00000045994	0.622437	21	46.8	66.9	44.5	47.5	2.3	0.2
Cyp46a1	ENSRNOG00000007147	2.43192	ENSMUSG00000021259	1.22426	9.1	25.7	11.8	22.6	19.6	2.5	0.4
Cdk14	ENSRNOG00000007151	2.63628	ENSMUSG00000028926	1.68186	4.7	25.4	16.6	18.3	2.8	1.5	3.6
Bhlhe40	ENSRNOG00000007152	1.23466	ENSMUSG00000030103	-3.28201	392.3	10.2	16.8	16.8	3.3	4.3	161.8
Qtrt1	ENSRNOG00000007158	2.06563	ENSMUSG00000002825	0.47671	4.4	7.7	7.3	6.2	2	8.8	4.5
Cln6	ENSRNOG00000007164	-0.594748	ENSMUSG00000032245	-0.862121	7.2	3.2	8.4	3.9	1.8	11.6	2
Map4k3	ENSRNOG00000007172	2.04857	ENSMUSG00000024242	1.06301	9.9	19.5	9.8	7.2	4	3.1	22
Mier1	ENSRNOG00000007175	2.99469	ENSMUSG00000028522	-0.333424	15.7	7.5	7.5	6.2	2.9	1.9	22.5
Kdelc2	ENSRNOG00000007177	4.13162	ENSMUSG00000034487	-0.30117	4.6	2.8	3.2	2	0.8	2.3	7.8
Ttc22	ENSRNOG00000007189	2.06965	ENSMUSG00000034919	2.32193	0.1	0.5	0.1	0.1	0.1	0.1	0.1
Nr1h4	ENSRNOG00000007197	-0.187403	ENSMUSG00000047638	2.32193	0.1	0.5	0.1	0.1	0.1	0.1	0.1
Psmc6	ENSRNOG00000007203	1.60377	ENSMUSG00000021832	0.597484	30.6	40.5	30.6	31.1	17.9	8.1	42.3
4930452B06Rik	ENSRNOG00000007206	-7.7005	ENSMUSG00000021747	2.1193	0.8	2.1	1.4	0.2	0.1	0.1	0.3
Yars	ENSRNOG00000007213	-0.595548	ENSMUSG00000028811	0.124339	12.4	22	25.4	29.9	18.7	22.2	12.5
Oma1	ENSRNOG00000007214	-0.996263	ENSMUSG00000035069	-2.45943	3.8	0.8	4.5	2.4	1.7	8.4	5.6
Dut	ENSRNOG00000007221	1.09387	ENSMUSG00000027203	0.911191	3.2	8.4	10.1	4.3	2.3	1.2	5.7
Cyp51	ENSRNOG00000007234	-2.91854	ENSMUSG00000001467	-1.23247	97.5	27.5	33.6	112.8	126.9	6.3	10.6
Atp5g1	ENSRNOG00000007235	0.74207	ENSMUSG00000006057	0.518291	3.1	11.1	6.6	8.7	10.4	5.1	12.6
Id2	ENSRNOG00000007237	-4.14889	ENSMUSG00000020644	-1.79002	331.8	56.6	84.1	23.3	7.1	703.2	24.9
Rrs1	ENSRNOG00000007240	2.01976	ENSMUSG00000061024	-0.471306	17.8	6.6	10.7	10.3	3.6	9.5	3
Fnbp4	ENSRNOG00000007241	0.51257	ENSMUSG00000008200	0.623852	31.1	18.8	14.8	10.8	1.5	5.5	9.5
Cdkn1b	ENSRNOG00000007249	1.73584	ENSMUSG00000003031	0.706368	34.8	38.1	26.6	13.3	8	7.6	49.8
Six4	ENSRNOG00000007250	-2.41915	ENSMUSG00000034460	-1.32193	0.1	0.1	0.8	0.3	0.1	0.1	0.1
Cbll1	ENSRNOG00000007253	0.232496	ENSMUSG00000020659	0.871844	4.1	6.1	4.3	3.7	2.1	2.4	3.4
Ttc9	ENSRNOG00000007254	1.69794	ENSMUSG00000042734	2.09954	2.6	19	11.9	4.5	5.6	1.7	0.3
Necab1	ENSRNOG00000007256	5.4214	ENSMUSG00000040536	4.90689	0.2	11.5	1.3	0.2	0.3	0.1	0.2
Ccdc134	ENSRNOG00000007262	-1.76765	ENSMUSG00000068114	-1.78022	6	2.3	14.6	12.4	3.8	8.3	2.3
Mnat1	ENSRNOG00000007267	2.10797	ENSMUSG00000021103	-1.03242	3.7	3.3	9.1	6.6	4.1	3	14
Il12rb2	ENSRNOG00000007270	3.64211	ENSMUSG00000018341	1.26303	0.2	0.4	0.2	0.2	0.1	0.2	0.1
Rnf103	ENSRNOG00000007272	-3.81593	ENSMUSG00000052656	0.770677	16.2	17.8	13.3	10.4	7	4.6	11.1
Erlec1	ENSRNOG00000007283	3.42674	ENSMUSG00000020311	-0.165059	14.7	8.8	12.1	9.8	5.9	5.3	11.4
Slc2a1	ENSRNOG00000007284	-6.69352	ENSMUSG00000028645	-4.0291	56.4	11.4	16.5	17	32.1	46.6	948.1
Mdm1	ENSRNOG00000007286	1.03145	ENSMUSG00000020212	0.298081	2.3	2.5	4.5	1.4	0.3	1.3	2.4
Atp1a2	ENSRNOG00000007290	-4.37244	ENSMUSG00000007097	-2.83302	746.6	25.6	243	41.5	23.8	14.6	25
Terf1	ENSRNOG00000007291	-2.23434	ENSMUSG00000025925	0.307625	5.8	4.6	4.3	2.4	0.9	0.9	8
Herc3	ENSRNOG00000007304	4.14449	ENSMUSG00000029804	1.42489	5.3	9.8	8.2	3.1	1.7	1.1	2.5
Klrb1b	ENSRNOG00000007310	-2.31161	ENSMUSG00000030361	3.20343e-16	0.1	0.1	0.1	0.1	0.1	0.1	0.1
Klrb1b	ENSRNOG00000007310	-2.31161	ENSMUSG00000030325	3.20343e-16	0.1	0.1	0.1	0.1	0.1	0.1	0.1
Thoc2	ENSRNOG00000007315	3.26583	ENSMUSG00000037475	0.147226	15.1	6.7	7.7	4.2	0.9	1.1	7.3
Idh3B	ENSRNOG00000007316	0.959113	ENSMUSG00000027406	0.657198	47.6	64.5	54.5	31.6	17.9	34.5	59.3
Plxna2	ENSRNOG00000007324	6.58085	ENSMUSG00000026640	1.09798	4.5	6.6	3.7	0.7	0.2	0.1	9.3
Usp28	ENSRNOG00000007325	4.27235	ENSMUSG00000032267	0.206451	8.1	4.5	5.2	2.7	1	3.6	2.8
Prepl	ENSRNOG00000007326	2.01786	ENSMUSG00000024127	1.83342	11.5	51.2	16.4	27.6	22	2.9	5.8
Pars2	ENSRNOG00000007327	-3.90603	ENSMUSG00000043572	0.158698	1.1	0.8	1.1	0.6	0.6	0.5	0.4
Frmd6	ENSRNOG00000007329	3.1391	ENSMUSG00000048285	0.639002	4.3	6.8	6	3.2	0.3	0.6	11.8
Capzb	ENSRNOG00000007330	2.88277	ENSMUSG00000028745	-0.617752	37.8	63.8	84.4	58.8	52.4	220.1	133.9
Ly6h	ENSRNOG00000007334	0.37548	ENSMUSG00000022577	3.62389	1.7	225.4	72.1	17.5	7.3	8.4	2.7
Churc1	ENSRNOG00000007336	2.53702	ENSMUSG00000090258	-0.415037	8.2	15.7	23.8	26.2	30.8	11.2	25.4
Fbln2	ENSRNOG00000007338	-3.42359	ENSMUSG00000064080	-0.790547	16.6	3.7	4.6	0.5	0.1	0.2	16.4
Amot	ENSRNOG00000007345	4.59054	ENSMUSG00000041688	-0.984893	21.2	2.4	2.2	0.5	0.3	0.1	4.2
Grasp	ENSRNOG00000007346	3.64145	ENSMUSG00000000531	-1.00856	2.9	4.2	2.6	3.4	1.3	8.8	31.7
Ggh	ENSRNOG00000007351	2.61152	ENSMUSG00000073987	-1.5477	21.3	6.1	34.6	18.7	12.6	4.8	15
Gca	ENSRNOG00000007359	-0.181338	ENSMUSG00000026893	2.18796	7.3	16.1	2.1	6.5	4.9	0.3	0.1
Rab15	ENSRNOG00000007364	2.77378	ENSMUSG00000021062	1.01728	0.5	11.2	12.7	3.8	7.1	7.5	1.6
Shisa4	ENSRNOG00000007369	-3.9311	ENSMUSG00000041889	-2.87269	56.5	18.4	73.8	322.1	350.7	4.4	1.1
Rnf144a	ENSRNOG00000007370	-0.236644	ENSMUSG00000020642	-1.58188	15	5.2	27.3	30.5	12.1	0.3	8.2
Rbmx2	ENSRNOG00000007371	3.55267	ENSMUSG00000031107	0.61193	2.2	2.7	2.5	1.8	1.3	1	1.8
Casp1	ENSRNOG00000007372	-6.62577	ENSMUSG00000025888	-0.807355	1.1	0.6	0.7	0.1	0.1	4.2	0.1
Tac1	ENSRNOG00000007374	0.155564	ENSMUSG00000061762	1.46949	1.9	7.8	11.8	2.1	0.7	0.1	0.3
Slit3	ENSRNOG00000007377	-2.49056	ENSMUSG00000056427	1.848	0.1	0.6	0.1	0.3	0.1	0.1	0.3
Per1	ENSRNOG00000007387	-0.463952	ENSMUSG00000020893	-0.715339	95.3	28.9	29.5	14.2	10.8	90.2	44.7
Nfkbia	ENSRNOG00000007390	-5.74737	ENSMUSG00000021025	-3.9729	49.6	13.1	28.6	12.4	5.1	720.1	418.4
Atp6v1f	ENSRNOG00000007392	3.72556	ENSMUSG00000004285	-0.145778	18.2	51.1	42.2	40.2	48.6	128.4	61.6
Ndrg1	ENSRNOG00000007393	-2.99012	ENSMUSG00000005125	-2.53543	0.8	9.3	0.9	50.6	256	2.6	12.6
Srebf2	ENSRNOG00000007400	-0.474184	ENSMUSG00000022463	-0.0810437	65.3	42.4	52.8	53.4	41.8	37	18.8
LOC100910710	ENSRNOG00000007407	-0.43036	ENSMUSG00000020022	0.0366186	8.8	13.3	13.9	16.8	15.8	10.6	11.9
Dab1	ENSRNOG00000007410	-1.80872	ENSMUSG00000028519	-0.358454	39.5	11.7	30	13.5	5.8	0.9	0.3
Ptgs1	ENSRNOG00000007415	0.664351	ENSMUSG00000047250	-4.8806	19.2	1.2	10.2	0.3	1.3	180.7	0.4
Clp1	ENSRNOG00000007416	1.219	ENSMUSG00000027079	-0.796747	4.7	2.6	4.2	3	1.8	5.1	8.3
Ipo9	ENSRNOG00000007418	2.80043	ENSMUSG00000041879	0.354262	21.1	23.5	22.6	16	12.3	16.2	22.1
LOC100362038	ENSRNOG00000007419	-0.139842	ENSMUSG00000018846	-0.177327	18.4	14.4	19.3	30.3	10.3	2.9	16.5
Vav2	ENSRNOG00000007422	1.28677	ENSMUSG00000009621	0.131372	4.7	9	11.8	3.9	0.7	25.4	2.8
Entpd6	ENSRNOG00000007427	-1.41495	ENSMUSG00000033068	0.566299	15.3	9.6	10.4	5.3	1.4	5.1	1.4
Shroom1	ENSRNOG00000007431	-1.08824	ENSMUSG00000018387	-2.73697	0.2	0.4	1.8	2.1	1.6	0.3	10
Polr3b	ENSRNOG00000007432	0.699908	ENSMUSG00000034453	-0.369234	4.1	2.8	5.4	3.4	2.3	3.3	3.2
Cyb561	ENSRNOG00000007433	3.10404	ENSMUSG00000019590	3.29241	0.3	12.9	0.8	1	0.9	0.8	4.1
Klhl32	ENSRNOG00000007441	6.40821	ENSMUSG00000040387	1.64245	2.8	6.4	6.6	2	0.6	0.1	0.2
Ubl7	ENSRNOG00000007442	4.44514	ENSMUSG00000055720	0.315542	11.1	26.3	25.2	23.4	24.4	21.1	21.6
Asph	ENSRNOG00000007445	2.43788	ENSMUSG00000028207	0.149266	33.3	15.6	20.9	5.5	1	20.6	3.1
Calb1	ENSRNOG00000007456	5.49443	ENSMUSG00000028222	3.71049	0.1	7.2	1.3	0.1	0.8	0.6	0.4
Pcnx	ENSRNOG00000007459	-0.523341	ENSMUSG00000021140	0.340459	9.2	11.1	9.6	9.3	4.7	4.2	15.6
Setd5	ENSRNOG00000007472	2.39828	ENSMUSG00000034269	0.133751	27.5	16	21	12.6	3.7	5.4	17.3
Cry2	ENSRNOG00000007478	2.21953	ENSMUSG00000068742	1.31283	66.5	44.8	14.6	15	4.8	4.4	2.9
Arfgef2	ENSRNOG00000007485	1.70779	ENSMUSG00000074582	0.152003	7.1	5.5	4	6.3	3.5	5.8	3
Rpn2	ENSRNOG00000007492	3.62016	ENSMUSG00000027642	-1.17891	72.7	34.4	102	72.9	30.3	103.2	86.2
Mtmr4	ENSRNOG00000007496	2.21974	ENSMUSG00000018401	0.758111	10.9	12.6	7.8	10.9	5.9	4.8	4.4
Actr10	ENSRNOG00000007504	2.46168	ENSMUSG00000021076	0.170365	12.8	20.5	21.6	25.5	18.5	9.8	21.1
Ndufaf4	ENSRNOG00000007506	-0.608553	ENSMUSG00000028261	-0.0423108	6.2	2.8	4	2.3	0.8	1	3
Lrtm2	ENSRNOG00000007508	2.45437	ENSMUSG00000055003	-0.504473	24.8	4.3	6.6	2.7	1.8	0.6	0.1
Bbs12	ENSRNOG00000007510	0.853014	ENSMUSG00000051444	-0.0339473	1.3	0.7	1.7	0.4	0.1	0.3	0.5
Kif3a	ENSRNOG00000007515	4.9898	ENSMUSG00000018395	1.18136	17	28.5	30.6	17.1	5.2	1.2	4.3
Nckap1	ENSRNOG00000007518	-0.169954	ENSMUSG00000027002	-0.171136	51	39.7	74.1	61.5	13.3	0.9	67.4
Tmem43	ENSRNOG00000007519	-0.219753	ENSMUSG00000030095	-0.0805146	21.6	15.1	20	11.2	6.7	19.1	17.2
Tm2d1	ENSRNOG00000007527	4.96299	ENSMUSG00000028563	0.0813883	6.7	7.9	7.6	8.2	6.4	4	11.9
RGD1305178	ENSRNOG00000007532	1.54411	ENSMUSG00000026851	0.216811	4.1	8.6	7.3	8.3	9.8	9	5.9
Fhl3	ENSRNOG00000007541	-2.09151	ENSMUSG00000032643	-5.28232	0.6	0.4	1.2	22.7	8.9	41.6	18.4
Scg5	ENSRNOG00000007542	6.00922	ENSMUSG00000023236	1.93087	18.8	156.2	129.3	60.6	30.3	3.7	3.1
Asns	ENSRNOG00000007546	2.97046	ENSMUSG00000029752	1.31366	1.2	17.4	17.4	10.3	4.5	2	6.6
Polr3f	ENSRNOG00000007548	2.9697	ENSMUSG00000027427	0.629162	7.2	5.8	5.7	3.7	0.9	1.2	3.8
Rem1	ENSRNOG00000007567	-6.27442	ENSMUSG00000000359	-1.58496	0.1	0.1	0.2	0.1	0.1	0.1	1.2
Padi2	ENSRNOG00000007574	-2.86651	ENSMUSG00000028927	-4.76377	1.9	0.3	1.5	16.9	25.6	2.9	0.1
Zfp597	ENSRNOG00000007576	1.60448	ENSMUSG00000039789	0.67516	2.7	3.3	3.1	2	0.7	0.4	3.5
Zfp830	ENSRNOG00000007578	1.58712	ENSMUSG00000046010	-0.149226	3.9	2.6	3.4	2.1	1.6	2.5	3.8
Zswim4	ENSRNOG00000007582	-1.98397	ENSMUSG00000035671	-0.296579	6.1	11.1	9.2	4.4	2.1	51.8	8.2
Pygb	ENSRNOG00000007583	-1.49007	ENSMUSG00000033059	0.0237077	111	31.7	19.6	6.9	11.2	19.8	18.6
Ehd4	ENSRNOG00000007584	-2.59146	ENSMUSG00000027293	-2.60835	0.7	1.7	4.8	3.2	2.9	37.5	13.1
Tcp11l2	ENSRNOG00000007587	-3.22405	ENSMUSG00000020034	0.450405	6.6	15.6	9	7	7.5	7	31.4
Rffl	ENSRNOG00000007596	-2.13301	ENSMUSG00000020696	-3.39023	1.4	1.1	1.5	14	26.2	21.3	4.8
Igsf1	ENSRNOG00000007600	-2.24118	ENSMUSG00000031111	-0.861924	19.3	2.1	2.4	0.5	0.3	0.1	0.3
Igsf8	ENSRNOG00000007604	3.37067	ENSMUSG00000038034	-0.861609	26.3	42	34.1	91.7	193.1	103.5	9.2
RGD1560831	ENSRNOG00000007605	-1.44574	ENSMUSG00000030744	-1.26291	48.6	124.9	165	179.2	241.2	615.9	548.5
Nr4a1	ENSRNOG00000007607	-0.264028	ENSMUSG00000023034	-0.638083	870.7	165.6	77.3	22.3	4.4	389.9	181.7
Arrdc1	ENSRNOG00000007622	0.526391	ENSMUSG00000026972	0.0312509	2	7	1.7	1.3	1.2	19.9	15
B3galt1	ENSRNOG00000007625	5.34968	ENSMUSG00000034780	3.13443	11.6	28.1	3.8	2.2	1.3	0.1	0.2
Ptp4a3	ENSRNOG00000007628	4.31386	ENSMUSG00000059895	-1.10154	6.1	9.6	9.5	3.6	2	44.6	57.8
Sf3a3	ENSRNOG00000007629	2.00867	ENSMUSG00000028902	-0.0478285	10.1	8.9	11.7	9.1	3.9	8.1	12.3
Cadps2	ENSRNOG00000007636	7.14427	ENSMUSG00000017978	1.03562	3.7	4.1	5.1	1.7	0.9	0.3	0.3
Acer2	ENSRNOG00000007637	-0.543495	ENSMUSG00000038007	-4.82443	0.2	0.1	0.4	0.2	0.2	0.8	15.2
Mbtps2	ENSRNOG00000007644	4.75392	ENSMUSG00000046873	1.02254	6.1	8.6	4.9	6.4	2.1	1.7	4.2
Kcnj9	ENSRNOG00000007645	2.53661	ENSMUSG00000038026	1.88452	0.1	2.4	1.6	0.2	0.8	1.1	0.1
Sipa1l1	ENSRNOG00000007646	2.84301	ENSMUSG00000042700	0.407175	4.3	6.1	8.8	1.5	1	8.1	3.9
Rab11b	ENSRNOG00000007648	1.43311	ENSMUSG00000077450	0.764784	10.7	19.2	12.9	10.6	11.2	13.4	9
Dnm2	ENSRNOG00000007649	-3.219	ENSMUSG00000033335	-1.70793	21.2	12.8	21.3	52.3	46.4	66.8	42.9
Cd63	ENSRNOG00000007650	-3.70523	ENSMUSG00000025351	-2.24096	26.1874	4.1	15.1	12.1	9.2	51.6	2.1
Col27a1	ENSRNOG00000007657	-0.367278	ENSMUSG00000045672	-3.68806	2.6	0.3	2	1.4	0.4	16.5	0.3
Fntb	ENSRNOG00000007660	4.33949	ENSMUSG00000033373	-0.790077	4.1	6.4	8.7	21.2	25.2	2.3	4.9
Zfp800	ENSRNOG00000007662	-1.33738	ENSMUSG00000039841	-0.796467	7.9	1.9	3.2	2.5	0.8	0.7	4.7
LOC100911372	ENSRNOG00000007663	3.39649	ENSMUSG00000028495	-1.35046	22.3	47.4	74.9	71.1	72.5	210	274.4
Tnfrsf13c	ENSRNOG00000007664	2.02144	ENSMUSG00000068105	-0.415037	0.2	0.2	0.3	0.2	0.6	0.2	0.1
Cse1l	ENSRNOG00000007665	4.98443	ENSMUSG00000002718	0.0427496	15.6	13.7	21.3	14.4	4.5	8.9	15.1
Cacnb4	ENSRNOG00000007666	2.37251	ENSMUSG00000017412	0.493332	0.5	6.1	8.4	11.4	4.8	0.3	0.6
Smu1	ENSRNOG00000007671	1.74946	ENSMUSG00000028409	-0.795009	12.5	9.5	22.4	16.1	10	17.9	20
Ppig	ENSRNOG00000007673	2.49041	ENSMUSG00000042133	0.815575	8.9	8.8	5.4	3	0.9	1	10.8
Gpr63	ENSRNOG00000007675	-2.37709	ENSMUSG00000040372	0.125531	3.3	1	1.1	0.6	0.2	0.1	0.2
Cyth4	ENSRNOG00000007679	0.0632402	ENSMUSG00000018008	-6.68276	5.7	0.5	9.9	0.5	1.3	283.7	7.1
Brd3	ENSRNOG00000007681	4.7234	ENSMUSG00000026918	1.3599	7.6	15.4	10.8	7.1	3	3	4.5
Gria3	ENSRNOG00000007682	1.90553	ENSMUSG00000001986	-1.38262	1.6	4.5	54.4	13.6	0.5	0.2	0.1
Zc3h3	ENSRNOG00000007684	1.19329	ENSMUSG00000075600	0.480626	3.4	4	3.4	2.4	1	5.4	1.6
Sema7a	ENSRNOG00000007687	1.41525	ENSMUSG00000038264	-2.21007	2.9	8.4	10.3	7.6	17.4	2.9	192.1
Sms	ENSRNOG00000007688	1.91833	ENSMUSG00000071708	2.4339	4.1	15.4	7.1	1.3	0.7	2.2	1.7
Ift52	ENSRNOG00000007692	0.653651	ENSMUSG00000017858	-0.337035	7.2	5.7	7.2	7.4	4	7	10.4
Golga5	ENSRNOG00000007699	0.693034	ENSMUSG00000021192	-0.812914	10	3.7	6.4	5.3	3	4.4	9.9
Thoc7	ENSRNOG00000007701	-0.667061	ENSMUSG00000053453	0.543935	23.2	31.2	32.9	21.1	13.5	6.8	30.9
[truncated: 6,239 more rows]
