# Supplementary material for: Adolescent exposure to Δ9-tetrahydrocannabinol alters the transcriptional trajectory and dendritic architecture of prefrontal pyramidal neurons
Source: Mol Psychiatry. 2018 Oct 3;24(4):588–600. doi: 10.1038/s41380-018-0243-x (PMC6430678; doi:10.1038/s41380-018-0243-x)
Supplement: Supplementary file 4 — Supplementary Table 2 [file 41380_2018_243_MOESM4_ESM.xlsx]

## Sheet: Differential_lists_2factor_rn6.
			THC vs. VEH (24 hrs)		THC vs. VEH (2 wks)		VEH Development		THC Development
Gene Name	Ensembl ID	RPKM.Mean	Log2FC	P-value	Log2FC	P-value	Log2FC	P-value	Log2FC	P-value
Gad1	ENSRNOG00000000007	23.3027	-0.215911	0.705892	-0.341652	0.51058	0.207321	0.707058	0.0815798	0.880301
Cbln1	ENSRNOG00000000010	31.6485	3.43033	0.0498884	-0.987189	0.540613	1.34802	0.448077	-3.0695	0.0634281
Hebp1	ENSRNOG00000000024	228.283	0.0143813	0.978764	-0.345147	0.491122	0.0940513	0.85843	-0.265476	0.605774
Tmcc2	ENSRNOG00000000033	10.8485	0.448472	0.537369	0.134042	0.833257	0.560931	0.44935	0.246501	0.719367
Klhdc8a	ENSRNOG00000000036	12.459	-0.431155	0.634257	0.57534	0.493739	-0.518935	0.566725	0.487559	0.571042
Xpr1	ENSRNOG00000000042	1.7341	-0.905529	0.412076	-0.0458961	0.963883	-0.436453	0.678758	0.423179	0.684296
Idua	ENSRNOG00000000043	6.88171	0.0795582	0.938939	0.482531	0.643457	-1.36196	0.196242	-0.958987	0.335742
Tmem175	ENSRNOG00000000044	11.1985	-0.823911	0.330604	0.84426	0.293189	-1.14365	0.169872	0.524517	0.511085
Gak	ENSRNOG00000000048	13.0387	-0.766512	0.140156	0.267849	0.573249	-0.778432	0.122719	0.25593	0.594376
Crp	ENSRNOG00000000053	2.48817	-0.356639	0.539696	0.274537	0.61844	-0.68762	0.235688	-0.0564434	0.918121
Abhd8	ENSRNOG00000000054	59.5029	-1.37693	0.0924804	-0.478466	0.495593	-0.131412	0.854037	0.76705	0.312494
Cplx1	ENSRNOG00000000060	205.817	0.554432	0.431283	-0.0690054	0.918696	-0.296726	0.674072	-0.920163	0.175622
Pcgf3	ENSRNOG00000000062	10.6853	-2.011	0.294552	-3.07052	0.0815843	0.0942785	0.954354	-0.965246	0.594592
Atp5i	ENSRNOG00000000064	211.881	0.711651	0.152866	0.0830288	0.85869	-0.18007	0.716833	-0.808692	0.0905268
Fbxo28	ENSRNOG00000000066	9.47371	0.00599115	0.993299	-0.484535	0.504674	-0.952232	0.177106	-1.44276	0.0434923
Ppp2r5a	ENSRNOG00000000068	35.7252	0.918173	0.151336	-1.38798	0.0254195	1.08954	0.0844349	-1.21661	0.0505554
Mtf2	ENSRNOG00000000075	11.2868	-0.623282	0.303599	-0.872229	0.132503	-0.0606993	0.91182	-0.309646	0.587599
Hltf	ENSRNOG00000000082	3.97782	-0.624409	0.341548	-0.70306	0.274783	-0.538634	0.381562	-0.617285	0.322882
Smad9	ENSRNOG00000000091	4.07822	-1.50496	0.186741	1.10671	0.361542	-3.47612	0.00468542	-0.864444	0.412803
Gpr89b	ENSRNOG00000000095	19.1026	-0.538911	0.512049	-0.268532	0.679973	1.11044	0.160713	1.38082	0.0843601
Pdzk1	ENSRNOG00000000096	2.72461	-0.631139	0.718039	0.767476	0.644499	-1.49317	0.391081	-0.0945532	0.954454
Rnf115	ENSRNOG00000000098	19.0107	0.206149	0.678992	0.058573	0.90154	-0.330473	0.506983	-0.478049	0.317184
Thoc3	ENSRNOG00000000104	16.7651	1.21585	0.110883	-1.37607	0.0339077	2.28208	0.00556947	-0.309838	0.656261
Cplx2	ENSRNOG00000000105	22.5599	-0.545445	0.201914	-0.346554	0.35161	0.332547	0.406438	0.531438	0.190111
Aga	ENSRNOG00000000108	3.28881	-0.616273	0.564808	0.249142	0.80816	-1.02657	0.330752	-0.161154	0.873416
Coprs	ENSRNOG00000000111	186.025	-0.987844	0.351746	0.409358	0.67173	-0.731514	0.466863	0.665687	0.506213
Champ1	ENSRNOG00000000112	16.8803	0.995874	0.0378573	-0.726073	0.0996238	0.613794	0.187934	-1.10815	0.0169322
Elac1	ENSRNOG00000000113	5.45307	-0.472171	0.610352	-0.0361092	0.967324	-0.713347	0.426308	-0.277286	0.752092
Ak2	ENSRNOG00000000122	2.66948	-0.0185149	0.987326	-0.63767	0.551868	0.446867	0.692587	-0.172288	0.87622
Rnf19b	ENSRNOG00000000123	8.85055	-1.33555	0.151941	0.658772	0.445111	-1.2595	0.162569	0.734815	0.39767
Kpna6	ENSRNOG00000000127	3.23723	0.612797	0.436565	0.0599314	0.93106	0.671716	0.401202	0.11885	0.872428
RGD1559864	ENSRNOG00000000129	11.0114	-0.669479	0.439272	-0.763824	0.329304	0.274707	0.728191	0.180362	0.825291
Dnajb5	ENSRNOG00000000130	80.8054	-0.345519	0.477407	-0.144341	0.743858	-0.00216075	0.996325	0.199016	0.6648
Txndc15	ENSRNOG00000000133	59.9485	0.0939933	0.886049	-0.0999177	0.868433	0.0449561	0.944427	-0.148955	0.810848
Plxdc2	ENSRNOG00000000142	8.89793	-0.350348	0.66688	-0.205024	0.779533	0.160608	0.835631	0.305932	0.691877
Dnajc1	ENSRNOG00000000150	6.71881	-0.375227	0.706017	-1.40405	0.152956	0.0862785	0.925299	-0.942547	0.324721
Cog3	ENSRNOG00000000155	2.96664	-0.359229	0.803652	0.849185	0.564456	-2.09375	0.15508	-0.885334	0.519336
Atg12	ENSRNOG00000000157	53.4709	0.505764	0.372978	-0.0549905	0.910037	0.850778	0.14407	0.290024	0.586549
Cdo1	ENSRNOG00000000158	47.1372	-0.409244	0.405202	0.304169	0.509944	-0.574492	0.239867	0.138921	0.763989
Chm	ENSRNOG00000000161	2.24257	-1.38301	0.280471	-0.0477402	0.967479	-0.620418	0.599767	0.714853	0.553016
Lamp2	ENSRNOG00000000164	11.8419	-0.232877	0.687797	-0.947292	0.0850827	0.500786	0.362732	-0.213629	0.697924
Apex2	ENSRNOG00000000166	4.14695	1.80769	0.166613	1.77699	0.145996	0.254663	0.852596	0.223956	0.85343
Gatm	ENSRNOG00000000168	11.0269	0.684702	0.347204	-0.789761	0.230039	0.949023	0.192496	-0.52544	0.444603
Spata5l1	ENSRNOG00000000169	1.58729	-2.7437	0.0581574	-2.18517	0.109486	-0.656702	0.62383	-0.0981737	0.940203
Slc30a4	ENSRNOG00000000170	11.9627	-1.05903	0.0542519	-0.817286	0.12837	-1.07673	0.0345859	-0.834992	0.1053
Sqrdl	ENSRNOG00000000172	6.9248	-0.365464	0.860823	1.85649	0.350527	-0.241488	0.909016	1.98046	0.322847
Mier2	ENSRNOG00000000175	1.1021	-0.757221	0.567278	-3.06901	0.0144137	1.79269	0.162171	-0.519095	0.678361
Mpst	ENSRNOG00000000185	1.68868	0.428596	0.77568	-0.74302	0.608662	1.31557	0.38329	0.143954	0.919559
Tst	ENSRNOG00000000186	24.5394	-0.911346	0.406143	-1.10764	0.250905	0.625203	0.527651	0.428908	0.678708
Ep300	ENSRNOG00000000190	10.7567	-0.674544	0.478839	-0.34415	0.69974	-0.579977	0.519689	-0.249583	0.781501
Cyp19a1	ENSRNOG00000000196	0.798023	0.577419	0.554307	-1.27932	0.164531	1.55886	0.108879	-0.297877	0.747057
Gsta5	ENSRNOG00000000201	6.97823	0.219345	0.782651	0.922063	0.218623	-0.386815	0.634963	0.315902	0.675776
Syncrip	ENSRNOG00000000204	3.72522	-0.790802	0.353709	0.098908	0.898873	-0.463813	0.565691	0.425897	0.595979
Ano10	ENSRNOG00000000219	11.5718	1.33564	0.332221	-0.244209	0.835076	1.61621	0.26191	0.0363599	0.977465
Abhd5	ENSRNOG00000000221	3.36093	0.592041	0.585929	0.826277	0.441137	-0.886243	0.434766	-0.652008	0.527832
Lmf1	ENSRNOG00000000230	9.63352	0.524563	0.597472	0.855852	0.380905	-0.741249	0.47536	-0.40996	0.66337
Kctd17	ENSRNOG00000000231	19.3523	-0.754704	0.287288	-0.0299557	0.96286	-0.329308	0.623392	0.39544	0.552785
Grm6	ENSRNOG00000000233	0.809835	0.472175	0.68157	0.773409	0.492697	-1.32641	0.2626	-1.02518	0.352123
Zfp207	ENSRNOG00000000236	15.493	-0.990748	0.137863	-0.450429	0.436492	0.00722313	0.990281	0.547541	0.379026
RGD1310429	ENSRNOG00000000237	4.16205	-2.13195	0.169057	1.8122	0.196392	-0.260517	0.868284	3.68363	0.0174716
Coil	ENSRNOG00000000244	16.9128	-0.509849	0.716377	-1.22815	0.319554	1.00289	0.438902	0.284587	0.830636
Slc16a6	ENSRNOG00000000245	3.16102	1.01527	0.466101	-1.3243	0.258442	3.35789	0.0177684	1.01832	0.439137
Amz2	ENSRNOG00000000246	43.8757	1.41591	0.0355884	0.409048	0.491657	0.252721	0.707307	-0.754142	0.220116
Mfsd11	ENSRNOG00000000247	17.2598	-0.952006	0.241914	1.06153	0.181746	-1.64337	0.0482386	0.370159	0.626156
Srsf2	ENSRNOG00000000248	85.1221	-0.131874	0.743626	-0.122679	0.742914	-0.0611892	0.876819	-0.0519938	0.891754
Mettl23	ENSRNOG00000000249	20.709	-0.801556	0.20725	-0.219603	0.712082	-0.674557	0.262421	-0.0926036	0.875492
Jmjd6	ENSRNOG00000000250	8.113	-0.773039	0.631641	-1.05746	0.470929	0.439948	0.769333	0.155525	0.918909
Smpd3	ENSRNOG00000000257	5.23043	-0.259476	0.664089	-0.485662	0.352578	0.705144	0.225299	0.478958	0.40038
Prmt7	ENSRNOG00000000258	3.56782	-1.42632	0.264696	-0.128746	0.899994	0.915635	0.442431	2.21321	0.0738301
Zfp821	ENSRNOG00000000262	7.18208	-0.0385584	0.962227	0.109101	0.883713	0.100629	0.901294	0.248288	0.748073
Def8	ENSRNOG00000000264	13.2928	-1.95629	0.0951575	0.314101	0.733234	-0.0710766	0.943193	2.19932	0.0508995
Phyhipl	ENSRNOG00000000274	45.805	0.141363	0.758829	0.3394	0.446336	-0.587668	0.215858	-0.389632	0.376836
Fam13c	ENSRNOG00000000275	4.13469	0.980489	0.508929	-2.15266	0.123055	1.60646	0.266286	-1.52669	0.28311
Rtn4ip1	ENSRNOG00000000279	8.87488	-1.00543	0.386707	0.312493	0.724957	0.999823	0.358096	2.31775	0.0421245
Prodh	ENSRNOG00000000281	2.05878	-2.1404	0.0748679	-0.151636	0.884378	0.279501	0.80164	2.26827	0.0487542
Dgcr14	ENSRNOG00000000283	2.03196	-0.388361	0.737027	-1.41155	0.188535	1.03088	0.356061	0.00769181	0.994399
Scarf2	ENSRNOG00000000288	0.919896	-2.39289	0.11288	-2.3159	0.112197	2.26191	0.138725	2.3389	0.103064
Foxo3	ENSRNOG00000000299	1.28286	-1.51765	0.297276	-0.905143	0.510471	-1.79662	0.215523	-1.18411	0.389127
Sesn1	ENSRNOG00000000302	26.2409	-0.224548	0.664035	0.044475	0.928843	-0.702033	0.175694	-0.433011	0.381062
Cep57l1	ENSRNOG00000000303	3.64271	-0.589055	0.593576	1.32908	0.252224	-2.67752	0.024074	-0.759382	0.467916
Cd164	ENSRNOG00000000304	49.1009	0.397408	0.414446	0.233171	0.613147	-0.332374	0.498344	-0.496612	0.285524
Smpd2	ENSRNOG00000000306	0.925591	-1.47691	0.30977	0.833493	0.552575	-0.384205	0.791741	1.92619	0.167562
Zbtb24	ENSRNOG00000000308	4.14818	-0.995482	0.242204	0.236539	0.759842	-0.700199	0.383056	0.531821	0.505274
Fig4	ENSRNOG00000000312	9.18585	-0.885009	0.300994	-0.28079	0.689939	0.655506	0.400691	1.25973	0.126202
Sec63	ENSRNOG00000000314	12.733	-0.503365	0.348966	-0.0560843	0.91082	-0.480074	0.356599	-0.0327939	0.948133
Sobp	ENSRNOG00000000316	5.90996	-0.69876	0.513857	1.64347	0.103086	-1.06547	0.328408	1.27676	0.215278
Cd24	ENSRNOG00000000321	143.169	-0.137277	0.663456	0.154539	0.608443	-0.572472	0.0789792	-0.280656	0.352775
Atg5	ENSRNOG00000000322	8.58207	-0.737503	0.406687	-0.328508	0.683574	-0.0557951	0.946269	0.3532	0.6736
Hace1	ENSRNOG00000000327	14.4073	0.231066	0.625699	-0.408368	0.352496	0.295564	0.528043	-0.34387	0.446122
RGD1304704	ENSRNOG00000000340	240.43	-0.236069	0.440945	0.320285	0.252708	-0.0533093	0.859472	0.503045	0.0929025
Nid2	ENSRNOG00000000341	0.406573	-2.0021	0.0900069	1.44901	0.181994	-3.74932	0.00290265	-0.298217	0.782136
Grik2	ENSRNOG00000000368	18.4997	-0.650919	0.217267	0.148979	0.757427	-0.563919	0.269554	0.235979	0.631427
Ctnna3	ENSRNOG00000000378	50.0861	0.301297	0.527503	0.206302	0.633018	0.182953	0.702751	0.0879587	0.844983
Atoh7	ENSRNOG00000000384	0.347177	-0.120263	0.890252	-0.601946	0.486683	1.26284	0.164675	0.781153	0.350083
Pbld1	ENSRNOG00000000386	0.512107	-2.52341	0.0507614	0.281625	0.804074	-2.62863	0.0483314	0.176399	0.879497
Slc25a16	ENSRNOG00000000387	2.83031	0.462032	0.48105	-0.959355	0.12838	0.560373	0.379745	-0.861013	0.174387
Supv3l1	ENSRNOG00000000392	15.3933	-0.508325	0.483322	0.370925	0.56656	-0.136825	0.846215	0.742425	0.284232
Srgn	ENSRNOG00000000394	3.73011	-1.07924	0.2053	-0.90585	0.256458	-0.33501	0.664907	-0.161618	0.838661
LOC606294	ENSRNOG00000000395	64.0297	0.378987	0.398379	-0.00447593	0.991366	0.118173	0.792058	-0.26529	0.531353
Ddx50	ENSRNOG00000000396	20.3297	0.887396	0.144406	-0.971337	0.102337	0.321381	0.581721	-1.53735	0.011943
Ccar1	ENSRNOG00000000397	12.5053	-0.926667	0.0499424	0.00237059	0.995501	-0.653667	0.137417	0.275371	0.520238
Zufsp	ENSRNOG00000000398	5.89115	-0.637042	0.455992	1.83171	0.0519932	-2.96491	0.00288911	-0.496162	0.537385
Gopc	ENSRNOG00000000408	24.4797	-0.170766	0.779154	0.190325	0.743785	-0.656793	0.280878	-0.295702	0.609669
Nus1	ENSRNOG00000000411	17.0972	0.291841	0.521538	0.546388	0.209912	-0.392231	0.400089	-0.137683	0.748949
Slc35f1	ENSRNOG00000000412	11.9442	-0.773114	0.15916	0.782607	0.132765	-1.01858	0.0669334	0.537144	0.2966
Cep85l	ENSRNOG00000000414	1.08237	-0.392473	0.838872	0.585933	0.744858	-1.59403	0.410304	-0.615622	0.736935
Asf1a	ENSRNOG00000000415	3.83869	-0.825075	0.30906	-0.0263205	0.971423	-0.379796	0.617218	0.418958	0.582803
Numa1	ENSRNOG00000000417	7.0675	0.179107	0.716252	0.132413	0.762687	0.3845	0.439082	0.337806	0.471528
Nelfe	ENSRNOG00000000420	16.1449	-1.44833	0.249334	1.29443	0.26111	-1.34069	0.266321	1.40207	0.240295
Skiv2l	ENSRNOG00000000421	8.49229	1.34045	0.305137	0.533405	0.648888	0.616173	0.649016	-0.190873	0.876025
Dxo	ENSRNOG00000000422	1.46517	-0.392595	0.774067	-0.496294	0.702178	0.531318	0.69689	0.427619	0.741806
LOC100360835	ENSRNOG00000000423	5.98496	-0.191556	0.882007	0.20629	0.861788	0.429398	0.738007	0.827244	0.501564
Atf6b	ENSRNOG00000000431	23.4332	1.41044	0.0646713	-0.194307	0.753377	1.52021	0.0581251	-0.0845321	0.902375
Fkbpl	ENSRNOG00000000432	27.3522	-1.41588	0.137605	-1.12204	0.151677	0.746801	0.362243	1.04064	0.244722
Prrt1	ENSRNOG00000000433	39.2582	-0.0803881	0.896531	0.0246952	0.965625	-0.0806362	0.895289	0.0244471	0.966735
Ppt2	ENSRNOG00000000435	5.00377	-1.24529	0.196336	-1.17926	0.197337	-0.357087	0.667633	-0.291061	0.746976
Agpat1	ENSRNOG00000000437	14.4724	-0.262576	0.717758	0.0512167	0.940104	-0.343809	0.632848	-0.0300166	0.965199
Rnf5	ENSRNOG00000000438	94.8959	0.527462	0.641443	0.923661	0.362836	0.284007	0.809111	0.680206	0.527441
Pbx2	ENSRNOG00000000440	75.6789	0.2787	0.504313	-0.283248	0.454484	0.453517	0.27809	-0.108431	0.782975
Rxrb	ENSRNOG00000000464	38.231	-0.578974	0.540163	0.8268	0.290601	0.580977	0.532742	1.98675	0.0348311
Slc39a7	ENSRNOG00000000465	24.0399	0.317136	0.669099	-0.34403	0.594696	0.859182	0.248857	0.198016	0.777575
Hsd17b8	ENSRNOG00000000466	21.8066	0.353938	0.836956	-2.49828	0.12435	1.39282	0.387781	-1.4594	0.376944
Ring1	ENSRNOG00000000467	8.15271	-1.30806	0.201393	-0.588332	0.506688	-0.0257636	0.977567	0.693963	0.468943
Vps52	ENSRNOG00000000470	4.00432	0.44151	0.650952	0.275422	0.754823	0.231696	0.813121	0.0656076	0.9433
Pfdn6	ENSRNOG00000000473	80.4453	-0.587062	0.44129	0.136461	0.828891	0.47753	0.511594	1.20105	0.104562
Rgl2	ENSRNOG00000000474	1.2187	-0.343085	0.812881	-0.084645	0.950712	-0.293482	0.837816	-0.035042	0.979654
Zbtb22	ENSRNOG00000000476	8.80326	-0.563126	0.369252	-0.487954	0.403266	-0.0869295	0.882538	-0.0117581	0.984082
Daxx	ENSRNOG00000000477	29.9113	-0.611217	0.664723	-0.103805	0.926978	1.11344	0.413771	1.62085	0.22963
Phf1	ENSRNOG00000000480	5.60032	0.569463	0.71584	-0.0340485	0.977787	2.54327	0.103527	1.93976	0.195332
Cuta	ENSRNOG00000000481	32.4268	-0.466208	0.540883	0.465714	0.477139	0.258345	0.728751	1.19027	0.108969
Syngap1	ENSRNOG00000000483	4.3821	0.450702	0.553926	-0.634765	0.359363	0.698546	0.352015	-0.386921	0.591633
Grm4	ENSRNOG00000000487	0.747944	1.65425	0.223139	-0.0750514	0.953159	0.966475	0.464532	-0.762831	0.547681
Hmga1	ENSRNOG00000000488	34.1621	-1.1432	0.494469	-1.47946	0.341063	0.519402	0.742514	0.183141	0.907687
Rps10	ENSRNOG00000000490	10.0079	-1.60787	0.136949	0.885327	0.368166	-0.977105	0.348012	1.51609	0.139207
Spdef	ENSRNOG00000000491	0.276452	0.96756	0.383417	-2.34826	0.0398586	2.59251	0.0301312	-0.723301	0.490386
Snrpc	ENSRNOG00000000493	88.1855	0.26513	0.751622	-0.932464	0.244025	0.379024	0.639981	-0.81857	0.309408
Anks1a	ENSRNOG00000000498	1.48796	-2.11739	0.032671	0.120743	0.882026	-0.434543	0.611203	1.80359	0.0526754
Zfp523	ENSRNOG00000000501	33.5646	-0.137197	0.752283	-0.131859	0.724188	0.698837	0.111202	0.704175	0.0983323
Def6	ENSRNOG00000000502	0.750056	0.327739	0.807359	1.06558	0.410852	-0.35925	0.786641	0.37859	0.766641
Ppard	ENSRNOG00000000503	3.992	-0.0827562	0.922628	-0.840519	0.270355	0.756148	0.354511	-0.00161552	0.998404
Fance	ENSRNOG00000000504	0.907606	0.980302	0.402328	-0.952736	0.389258	1.14312	0.32339	-0.789922	0.475775
Srpk1	ENSRNOG00000000511	12.0399	-0.756293	0.339927	-0.734259	0.308669	0.0171018	0.981154	0.0391352	0.958069
Slc26a8	ENSRNOG00000000512	6.13657	0.68072	0.42362	-1.81011	0.0163538	2.31334	0.0100248	-0.177496	0.823411
Mapk14	ENSRNOG00000000513	77.6065	0.273155	0.721403	0.67017	0.300054	0.781458	0.322226	1.17847	0.114329
Mapk13	ENSRNOG00000000515	6.81899	0.35456	0.674804	-0.85034	0.288136	0.491791	0.549176	-0.71311	0.377838
Kctd20	ENSRNOG00000000517	0.578497	-3.27507	0.0144575	1.28	0.273055	-3.05557	0.0245265	1.49951	0.209554
Stk38	ENSRNOG00000000519	5.82607	2.02908	0.170001	2.55972	0.082747	-1.31597	0.41601	-0.785327	0.569928
Srsf3	ENSRNOG00000000520	85.7631	-0.10799	0.719218	-0.331363	0.23518	0.181023	0.537093	-0.0423503	0.881663
Cpne5	ENSRNOG00000000522	10.0659	-0.869045	0.100619	0.0898306	0.849445	-0.550994	0.265875	0.407881	0.40423
Ppil1	ENSRNOG00000000523	9.46348	-1.57778	0.266485	0.938208	0.484582	-1.18713	0.395275	1.32886	0.32222
RGD735065	ENSRNOG00000000524	35.5877	0.0390792	0.935388	0.217914	0.629232	-0.163235	0.734677	0.0156005	0.972782
Pi16	ENSRNOG00000000525	2.72737	-1.42008	0.336227	1.85104	0.180758	-0.443692	0.769624	2.82743	0.0524039
Mtch1	ENSRNOG00000000527	209.922	-0.321569	0.48369	-0.0258123	0.950423	-0.00783013	0.985948	0.287926	0.50813
Ccdc167	ENSRNOG00000000531	24.6658	0.438966	0.820979	-2.036	0.265806	0.534715	0.776496	-1.94025	0.298616
Cmtr1	ENSRNOG00000000532	24.0798	-0.0585764	0.908154	-0.614357	0.172289	0.936938	0.0664908	0.381157	0.431366
Btbd9	ENSRNOG00000000540	28.2097	0.381974	0.68125	-1.17559	0.160905	1.27873	0.163598	-0.278833	0.751354
Glo1	ENSRNOG00000000541	265.161	0.276977	0.75767	-1.35503	0.120934	0.563669	0.511932	-1.06834	0.219044
Nt5dc1	ENSRNOG00000000546	2.78025	0.0464346	0.957006	-0.420251	0.598806	0.179832	0.830929	-0.286854	0.725969
Tspyl4	ENSRNOG00000000547	285.895	-0.179911	0.62677	0.0126273	0.969656	0.174585	0.630499	0.367124	0.300593
Tspyl1	ENSRNOG00000000549	51.7958	0.0165893	0.95815	-0.113439	0.711	-0.519547	0.107526	-0.649576	0.0408516
RGD1305587	ENSRNOG00000000551	47.6362	-0.434472	0.357028	-0.54452	0.19777	0.483106	0.283384	0.373057	0.403259
Sar1a	ENSRNOG00000000557	126.763	-0.147744	0.691915	0.0748384	0.834322	-0.648229	0.0887151	-0.425647	0.236758
Lrrc20	ENSRNOG00000000560	10.4527	-2.9519	0.0247734	2.03257	0.0297751	0.157484	0.886655	5.14195	0.000212639
Pald1	ENSRNOG00000000561	1.96767	-0.303821	0.764819	1.98313	0.0591077	-1.88645	0.0858283	0.400496	0.678037
Sgpl1	ENSRNOG00000000565	16.9357	-0.705102	0.492195	-0.388624	0.669058	0.235798	0.80937	0.552275	0.56961
Pcbd1	ENSRNOG00000000566	6.86358	0.343992	0.735383	-0.0788254	0.930289	0.720974	0.476888	0.298156	0.757004
Unc5b	ENSRNOG00000000567	0.68086	-1.38103	0.276699	-1.10967	0.359273	-0.940392	0.436317	-0.669035	0.574416
MGC112715	ENSRNOG00000000569	4.90568	-0.254442	0.857578	2.79384	0.0346092	-0.410304	0.782757	2.63798	0.0612363
Psap	ENSRNOG00000000571	1266.24	0.0173272	0.943802	0.0965541	0.653605	0.398817	0.113837	0.478044	0.0510583
Anapc16	ENSRNOG00000000576	6.76764	-1.01284	0.423409	-0.288679	0.787384	0.717456	0.546751	1.44161	0.233381
Marcks	ENSRNOG00000000579	64.0857	0.223333	0.431678	-0.114206	0.672501	-0.271836	0.338506	-0.609375	0.0322658
Cdc40	ENSRNOG00000000581	22.1479	-1.15384	0.100149	-0.179445	0.763952	-0.0863229	0.890594	0.888075	0.177248
LOC100911156	ENSRNOG00000000582	9.19777	0.51368	0.73159	-0.168321	0.899512	0.897898	0.54927	0.215896	0.878875
Cdk19	ENSRNOG00000000583	10.6662	1.05358	0.0781122	-0.380573	0.463687	0.901203	0.134814	-0.532946	0.332732
Amd1	ENSRNOG00000000585	122.009	0.321257	0.318612	0.27574	0.356949	-0.108524	0.736464	-0.154041	0.61064
Gtf3c6	ENSRNOG00000000586	44.5792	-0.890969	0.14365	-0.197644	0.727791	-0.732533	0.201883	-0.0392081	0.944405
Rpf2	ENSRNOG00000000587	18.508	-0.441545	0.432641	-0.773977	0.182165	-0.942042	0.083402	-1.27447	0.024705
RGD1310495	ENSRNOG00000000589	0.955435	0.807862	0.611265	1.59234	0.301668	-0.174214	0.909959	0.610267	0.685412
Naglt1	ENSRNOG00000000590	1.96244	-0.37313	0.61797	0.0873649	0.901479	-0.591541	0.4199	-0.131046	0.853148
Rev3l	ENSRNOG00000000593	5.47987	-0.247564	0.778053	-0.313697	0.697578	-0.00702676	0.993343	-0.0731595	0.929998
Fyn	ENSRNOG00000000596	104.624	0.287171	0.496762	0.331595	0.339453	1.17483	0.0112193	1.21926	0.00559215
Lama4	ENSRNOG00000000599	1.22917	-1.92325	0.224558	0.919552	0.530277	-1.38617	0.358887	1.45664	0.329157
Hdac2	ENSRNOG00000000604	21.1479	0.494767	0.32237	-0.10505	0.815812	0.369453	0.462771	-0.230364	0.623551
Hs3st5	ENSRNOG00000000605	6.30318	0.0687138	0.930789	-1.37567	0.0771875	0.608267	0.418274	-0.836117	0.273911
Pcdh15	ENSRNOG00000000606	1.45604	1.1206	0.406229	-1.78298	0.162663	1.4073	0.291324	-1.49627	0.246606
Ipmk	ENSRNOG00000000609	19.4174	-0.103294	0.896591	0.454043	0.550789	-0.65847	0.40819	-0.101133	0.8933
Cisd1	ENSRNOG00000000610	95.3533	0.00662099	0.988588	0.164376	0.714271	-0.702213	0.137689	-0.544458	0.224213
Ube2d1	ENSRNOG00000000611	18.272	-0.645736	0.29718	-0.0834307	0.884187	-0.457437	0.436927	0.104868	0.856486
Tfam	ENSRNOG00000000613	37.2476	0.196247	0.770049	-0.442267	0.484769	0.183887	0.781026	-0.454627	0.477873
Mdga2	ENSRNOG00000000618	8.49451	-0.380849	0.547625	-0.298655	0.595603	0.244948	0.686042	0.327142	0.58549
Hint1-ps1	ENSRNOG00000000622	280.244	-0.0363442	0.934591	-0.167786	0.683015	0.0156769	0.97127	-0.115765	0.783069
Rhobtb1	ENSRNOG00000000633	1.83028	-1.7918	0.122081	-2.22048	0.0398602	0.473253	0.61596	0.0445731	0.967037
Arid5b	ENSRNOG00000000635	8.76672	0.930506	0.532598	-1.36058	0.263341	2.66278	0.0785788	0.371692	0.790034
Zfp365	ENSRNOG00000000638	46.1224	0.583231	0.235287	-0.554154	0.239368	0.0817786	0.864408	-1.05561	0.0304721
Ado	ENSRNOG00000000639	2.89257	0.575714	0.72842	1.14151	0.455549	-2.54156	0.133837	-1.97576	0.217583
Egr2	ENSRNOG00000000640	39.6193	0.179066	0.755258	0.044787	0.932266	-0.0117693	0.98364	-0.146048	0.788545
LOC100363472	ENSRNOG00000000641	7.37488	-0.626451	0.304372	0.334827	0.563632	-0.943742	0.118	0.0175361	0.975484
Reep3	ENSRNOG00000000645	2.29256	-0.755143	0.39845	-0.565085	0.536235	-1.49771	0.0853144	-1.30765	0.130764
Jmjd1c	ENSRNOG00000000648	38.5927	0.18895	0.585056	0.0175594	0.955592	0.188871	0.583965	0.0174807	0.957342
Nek7	ENSRNOG00000000657	2.7241	-1.4731	0.420331	2.17756	0.216383	-1.83124	0.316624	1.81943	0.296996
Hps4	ENSRNOG00000000661	1.17356	-0.426257	0.685925	-0.396193	0.692256	-0.488415	0.633565	-0.45835	0.647051
Srrd	ENSRNOG00000000662	1.94695	1.44998	0.167254	-0.689877	0.481383	0.497656	0.627674	-1.6422	0.102737
Tfip11	ENSRNOG00000000663	2.72918	-0.577035	0.526064	-0.728154	0.333675	1.26436	0.1458	1.11324	0.202397
Tpst2	ENSRNOG00000000664	2.79948	-0.797073	0.34809	-0.538405	0.470243	0.558239	0.485173	0.816907	0.311391
Pitpnb	ENSRNOG00000000665	17.6814	-0.860293	0.276677	-0.384009	0.579185	0.026293	0.971144	0.502577	0.498901
Ung	ENSRNOG00000000692	4.09054	0.458507	0.649533	0.689539	0.423605	0.975017	0.347159	1.20605	0.21405
Svop	ENSRNOG00000000693	63.3858	0.6148	0.414351	-0.5583	0.417665	0.644777	0.390223	-0.528323	0.458709
Ssh1	ENSRNOG00000000695	4.06155	-1.36309	0.264952	-2.0696	0.0923582	-0.500946	0.627774	-1.20745	0.301869
Coro1c	ENSRNOG00000000697	24.9678	-0.24992	0.716063	0.180994	0.759394	0.512598	0.451462	0.943511	0.156787
Selplg	ENSRNOG00000000699	1.42186	-0.834533	0.545187	-2.35754	0.0821081	0.995824	0.481204	-0.527181	0.686333
Tmem119	ENSRNOG00000000700	6.87776	-0.762423	0.673574	-2.06249	0.170848	2.27448	0.17214	0.974418	0.569805
Iscu	ENSRNOG00000000701	254.966	-0.767149	0.193629	0.177855	0.737031	-0.479212	0.394593	0.465792	0.399197
Sart3	ENSRNOG00000000702	11.861	0.27884	0.745984	0.417978	0.584737	0.194424	0.822429	0.333562	0.682638
Sgsm1	ENSRNOG00000000708	34.9631	0.494889	0.273007	0.200496	0.613943	0.54041	0.237978	0.246017	0.56056
Htr1f	ENSRNOG00000000716	2.18898	-2.52512	0.112812	-1.03233	0.476046	-3.48327	0.0327478	-1.99048	0.183127
Cggbp1	ENSRNOG00000000718	10.314	-0.034269	0.938012	0.0318017	0.940915	-0.634467	0.157091	-0.568397	0.184204
MGC95208	ENSRNOG00000000720	0.994655	-0.0166604	0.990205	0.612262	0.628549	-1.37126	0.315338	-0.742336	0.565907
RT1-CE5	ENSRNOG00000000723	3.56585	0.670995	0.530743	-1.50376	0.0873133	3.1143	0.00539679	0.939546	0.353361
Clic2	ENSRNOG00000000728	3.82202	-1.29134	0.462633	-1.32482	0.428409	2.33644	0.183189	2.30296	0.175013
Tmlhe	ENSRNOG00000000729	2.57544	-0.677596	0.457353	-1.08438	0.22583	-0.718055	0.410052	-1.12483	0.200472
RT1-M3-1	ENSRNOG00000000763	5.56195	0.101543	0.911689	-1.64434	0.0489428	1.6361	0.0684245	-0.109786	0.899293
Gabbr1	ENSRNOG00000000774	127.881	0.211775	0.547189	-0.406041	0.22131	0.209783	0.544138	-0.408032	0.228343
Mog	ENSRNOG00000000775	5.12821	-0.377992	0.660089	-0.802303	0.265256	1.28686	0.12155	0.862546	0.29362
RT1-S3	ENSRNOG00000000777	21.9389	-1.65246	0.326906	-0.890456	0.552699	-0.205431	0.889874	0.556574	0.726147
Znrd1as1	ENSRNOG00000000778	4.14837	-1.24637	0.273832	0.530466	0.635075	-1.91028	0.0879005	-0.133441	0.90011
Znrd1	ENSRNOG00000000779	12.7301	0.807179	0.370016	-0.895897	0.254199	1.57547	0.0873676	-0.127601	0.87963
Ppp1r11	ENSRNOG00000000780	31.5996	-0.52538	0.361823	-0.0297877	0.95455	-0.262176	0.63517	0.233416	0.666641
Rnf39	ENSRNOG00000000781	10.628	-0.26192	0.791665	1.53514	0.0893413	-0.306582	0.762239	1.49048	0.123857
Trim39	ENSRNOG00000000785	5.80164	-0.322688	0.702914	0.172988	0.832621	-0.750404	0.368875	-0.254727	0.750845
Rpp21	ENSRNOG00000000786	11.168	1.98734	0.0722796	0.86656	0.393485	0.072523	0.949776	-1.04826	0.30522
Ranbp2	ENSRNOG00000000796	6.53097	-0.0752405	0.909609	-0.142393	0.826298	-0.745268	0.25745	-0.81242	0.20594
Gnl1	ENSRNOG00000000798	6.75802	-0.304965	0.747595	0.170538	0.82792	0.702516	0.446351	1.17802	0.19681
Abcf1	ENSRNOG00000000799	45.3293	-0.127325	0.868455	1.51877	0.0636059	-1.79173	0.0354494	-0.14564	0.841543
Man1a1	ENSRNOG00000000800	6.58669	-0.0045545	0.993861	-0.32745	0.561419	-0.217409	0.706323	-0.540305	0.34205
Msl3l2	ENSRNOG00000000801	8.37734	0.817273	0.509327	-0.725049	0.535592	0.480946	0.696048	-1.06138	0.368767
Tbc1d32	ENSRNOG00000000802	2.20075	1.36446	0.333229	2.14501	0.141455	-3.08058	0.0435077	-2.30003	0.0932762
Mrps18b	ENSRNOG00000000804	55.2054	1.36481	0.101074	0.088471	0.900077	1.1136	0.196267	-0.162735	0.830673
Gja1	ENSRNOG00000000805	43.5686	-0.340058	0.372786	0.143453	0.680395	-0.25187	0.498404	0.23164	0.519984
Hsf2	ENSRNOG00000000808	14.6067	-0.000708642	0.998918	0.311573	0.524839	-0.341609	0.515256	-0.029327	0.952821
Atat1	ENSRNOG00000000809	3.93415	-0.0110246	0.989271	0.0536666	0.944278	-0.10999	0.892153	-0.045299	0.953557
Pkib	ENSRNOG00000000811	1.1687	1.38705	0.132349	1.14705	0.189038	-0.14107	0.874672	-0.381077	0.653954
RGD1302996	ENSRNOG00000000812	1.31831	0.158656	0.922002	-1.80212	0.237434	2.27171	0.156608	0.31094	0.839841
Fabp7	ENSRNOG00000000814	7.69942	-0.802053	0.321762	-0.268328	0.706568	0.171787	0.821463	0.705511	0.357161
Smpdl3a	ENSRNOG00000000815	2.3483	0.150061	0.905825	-0.609177	0.623793	-0.648707	0.606161	-1.40795	0.25022
Ppp1r18	ENSRNOG00000000816	0.791376	-3.62558	0.0069096	1.79108	0.134522	-5.00213	0.000341203	0.414533	0.719269
Nrm	ENSRNOG00000000818	4.86555	1.63239	0.330371	-2.06281	0.190974	1.51086	0.362016	-2.18434	0.17496
Gcc2	ENSRNOG00000000823	10.5832	-1.63227	0.0222142	-0.461556	0.448691	-0.594162	0.326151	0.576555	0.367692
Dse	ENSRNOG00000000824	2.62044	-2.21579	0.126299	-0.184084	0.896348	-2.42105	0.0737388	-0.389346	0.770584
Flot1	ENSRNOG00000000826	36.7701	-1.02612	0.171745	-0.456636	0.442013	0.909437	0.18376	1.47892	0.0429093
Gtf2h4	ENSRNOG00000000831	3.64981	-2.0756	0.130263	0.653479	0.575798	0.0531019	0.967438	2.78219	0.0372712
Vars2	ENSRNOG00000000833	4.97489	-1.45608	0.322002	1.67232	0.174067	-0.311703	0.82447	2.8167	0.0506695
Nfkbil1	ENSRNOG00000000839	4.32432	-4.42748	0.0237709	-0.788088	0.663626	-2.37778	0.210812	1.26162	0.469034
Atp6v1g2	ENSRNOG00000000840	186.448	0.173242	0.573996	0.0964235	0.733291	0.0542697	0.859714	-0.0225483	0.938241
Ddx39b	ENSRNOG00000000841	94.7816	0.44626	0.215549	-0.122446	0.693189	0.838752	0.0270667	0.270046	0.422844
Ddah2	ENSRNOG00000000842	0.779379	-1.64105	0.18652	0.122701	0.918891	0.794405	0.523186	2.55816	0.0362463
Csnk2b	ENSRNOG00000000847	47.8511	-1.31765	0.00502565	0.210686	0.587482	-0.787251	0.057298	0.741088	0.0759111
Gpank1	ENSRNOG00000000848	4.63981	1.00114	0.442477	-0.103347	0.927032	1.23729	0.342694	0.132802	0.913578
Apom	ENSRNOG00000000850	1.65501	-1.08088	0.520939	-1.00066	0.523783	-1.09526	0.526391	-1.01504	0.52523
Bag6	ENSRNOG00000000851	49.2958	-0.733264	0.170059	0.625764	0.176831	-0.04877	0.923011	1.31026	0.0144182
Prrc2a	ENSRNOG00000000852	11.9181	-2.87713	0.00429556	0.143141	0.836682	-0.412226	0.578673	2.60805	0.00599379
Aif1	ENSRNOG00000000853	2.22219	3.47329	0.0136172	-0.715655	0.58515	0.632704	0.645246	-3.55625	0.00851577
Ncr3	ENSRNOG00000000854	1.47066	-0.962816	0.226616	-0.520918	0.478575	-0.317256	0.672643	0.124642	0.866502
Rbmx	ENSRNOG00000000866	4.69338	0.168468	0.86729	-0.392667	0.664705	0.502706	0.61265	-0.0584286	0.951217
Vars	ENSRNOG00000000867	3.46995	-1.52262	0.132064	-0.38014	0.670683	-0.40727	0.649495	0.735216	0.434601
Fhl1	ENSRNOG00000000875	70.9176	0.501179	0.232086	0.677551	0.0877395	-0.143376	0.736389	0.0329962	0.932649
Slc9a6	ENSRNOG00000000879	22.6118	0.275082	0.441404	0.118997	0.72724	-0.371614	0.304205	-0.527699	0.128367
Mmgt1	ENSRNOG00000000881	42.4263	-0.163372	0.864102	-1.20472	0.223638	-0.727904	0.409525	-1.76926	0.0626377
Auts2	ENSRNOG00000000885	6.01296	0.914834	0.444256	-1.10593	0.318808	1.06827	0.361593	-0.952495	0.401871
Caln1	ENSRNOG00000000886	34.5406	-0.731048	0.267235	-0.579422	0.342973	-0.233695	0.700692	-0.0820695	0.894044
Sbds	ENSRNOG00000000888	13.2245	-0.385266	0.669704	-0.427856	0.644844	-1.37416	0.120893	-1.41675	0.108745
Tmem248	ENSRNOG00000000893	24.5514	-0.0205454	0.98004	0.181456	0.796409	0.437864	0.59026	0.639865	0.413833
Fry	ENSRNOG00000000894	15.2394	-0.0526449	0.923802	-0.255138	0.623484	-0.213129	0.691618	-0.415622	0.430056
Rabgef1	ENSRNOG00000000895	16.9386	-0.661841	0.214652	-0.37809	0.434522	-0.127929	0.795117	0.155822	0.753815
Tpst1	ENSRNOG00000000900	18.2189	-0.236897	0.698998	0.238827	0.657188	0.150064	0.802262	0.625788	0.287007
Crcp	ENSRNOG00000000901	79.3527	0.570201	0.393005	0.366547	0.550383	-0.00783142	0.990751	-0.211485	0.736302
Hsph1	ENSRNOG00000000902	52.9639	0.0468471	0.900671	-0.462988	0.204465	-0.113269	0.756934	-0.623105	0.0923384
Asl	ENSRNOG00000000903	4.62308	-3.16592	0.0433236	1.32359	0.364521	-2.631	0.0778299	1.85851	0.196232
Medag	ENSRNOG00000000906	13.2844	0.819861	0.251891	0.467287	0.446876	0.796304	0.282026	0.44373	0.507368
Uspl1	ENSRNOG00000000909	6.84942	1.02845	0.170771	-0.654725	0.311736	1.17904	0.123288	-0.504134	0.469785
Zbed5	ENSRNOG00000000918	4.18488	-0.865201	0.452299	0.799305	0.433935	-0.162585	0.885112	1.50192	0.175738
Ubl3	ENSRNOG00000000921	48.56	0.0741967	0.841894	-0.120414	0.714623	0.488152	0.193632	0.293541	0.408687
Sumf2	ENSRNOG00000000922	6.99006	-1.39212	0.367835	-0.408823	0.757535	0.15063	0.914428	1.13393	0.438245
Cct6a	ENSRNOG00000000923	54.4499	-0.23542	0.632799	0.144895	0.745657	-0.0250607	0.958665	0.355254	0.449071
Slc7a1	ENSRNOG00000000924	4.19286	0.726334	0.288329	-0.569199	0.383754	0.121541	0.856889	-1.17399	0.0782822
Psph	ENSRNOG00000000925	38.8266	1.44557	0.0562807	-0.588534	0.356015	1.3201	0.0877236	-0.713999	0.302189
Mrps17	ENSRNOG00000000926	9.98333	-0.241565	0.791301	-0.980408	0.249967	0.344493	0.688423	-0.39435	0.649946
Sfswap	ENSRNOG00000000931	32.5488	0.283972	0.767406	0.395172	0.666682	-0.458306	0.641811	-0.347106	0.703451
Piwil1	ENSRNOG00000000934	1.08053	-0.130118	0.853097	0.154806	0.810619	-0.0116353	0.986624	0.273289	0.682278
Stx2	ENSRNOG00000000936	5.66026	1.43595	0.309634	-1.97414	0.0883522	3.56649	0.0147175	0.156394	0.904953
Slc46a3	ENSRNOG00000000937	1.61305	0.231221	0.865316	-0.404798	0.741937	2.62949	0.0588637	1.99347	0.134473
Ran	ENSRNOG00000000938	254.016	0.0725291	0.796661	-0.340861	0.202135	0.124255	0.653798	-0.289135	0.285912
Flt1	ENSRNOG00000000940	3.55866	-3.58772	0.0202591	-0.315739	0.80092	-1.52129	0.200094	1.7507	0.215293
Pan3	ENSRNOG00000000942	2.37139	-2.66434	0.0107626	-0.0589772	0.947077	-1.24607	0.158369	1.3593	0.146773
LOC687430	ENSRNOG00000000943	0.416177	0.490481	0.531496	0.195628	0.786418	-0.865335	0.270165	-1.16019	0.12848
Rpo1-3	ENSRNOG00000000954	20.4262	-0.465643	0.51767	1.0431	0.125415	-0.709166	0.331243	0.799581	0.247344
Lnx2	ENSRNOG00000000955	3.52285	-0.128193	0.885851	-0.261555	0.783871	-1.92476	0.0344685	-2.05812	0.0226834
Rasl11a	ENSRNOG00000000956	102.718	-0.238672	0.787298	-0.0928778	0.902751	0.501313	0.557867	0.647108	0.442436
LOC100361103	ENSRNOG00000000957	67.0798	-0.761985	0.119303	-0.422967	0.346137	-0.371766	0.405676	-0.0327472	0.941985
Glt1d1	ENSRNOG00000000961	2.92926	0.188612	0.841222	0.643145	0.448584	-0.0714939	0.939969	0.38304	0.668229
Slc15a4	ENSRNOG00000000962	4.68723	0.077827	0.947324	-1.53666	0.14793	1.34099	0.230385	-0.273495	0.806811
Tmem132c	ENSRNOG00000000963	1.30479	-3.49836	0.0362915	-0.00952828	0.994912	-2.8031	0.095283	0.685729	0.64697
Aacs	ENSRNOG00000000967	12.1561	0.256792	0.640747	-0.00991515	0.984695	-0.0777831	0.887368	-0.34449	0.51055
Rnf6	ENSRNOG00000000968	3.19428	-0.811239	0.434988	0.255996	0.799973	-1.34992	0.185613	-0.28269	0.772756
Zfp358	ENSRNOG00000000974	2.22027	-0.260672	0.791091	0.399797	0.660532	-0.224996	0.817891	0.435473	0.641449
Mcoln1	ENSRNOG00000000975	10.7966	-1.97548	0.0423724	0.166577	0.832445	-0.488385	0.555361	1.65368	0.0703661
Pnpla6	ENSRNOG00000000977	2.05214	-0.969259	0.367436	0.501683	0.619579	-0.944967	0.364224	0.525975	0.603714
Bri3bp	ENSRNOG00000000979	4.38131	-0.889722	0.414511	-0.940893	0.314126	1.17748	0.253211	1.12631	0.278463
Scarb1	ENSRNOG00000000981	8.10415	-0.52708	0.56412	-0.925757	0.235503	1.03951	0.223478	0.640832	0.460174
Zfp394	ENSRNOG00000000983	6.26017	1.37668	0.0985858	-0.738797	0.293015	1.58861	0.0646562	-0.526863	0.490598
Cpsf4	ENSRNOG00000000985	6.3546	0.299223	0.707306	-0.0773694	0.914761	0.206149	0.796129	-0.170443	0.821283
Camsap3	ENSRNOG00000000986	4.89889	0.883007	0.495094	1.08683	0.335526	0.509899	0.70836	0.71372	0.559975
Ptcd1	ENSRNOG00000000987	1.85609	-0.972624	0.332702	0.832506	0.33475	0.0871611	0.928554	1.89229	0.0549103
Xab2	ENSRNOG00000000988	27.8121	-0.248243	0.866137	-1.1202	0.335392	1.99204	0.164499	1.12009	0.421224
Bud31	ENSRNOG00000000989	40.7572	0.412055	0.401445	-0.811014	0.0826798	0.614829	0.205245	-0.60824	0.197519
Pdap1	ENSRNOG00000000990	24.3826	0.277149	0.678045	0.7524	0.204311	0.345643	0.613282	0.820894	0.202694
Arpc1b	ENSRNOG00000000991	0.80769	0.555551	0.712926	0.930273	0.532944	0.928744	0.532125	1.30347	0.367023
Arpc1a	ENSRNOG00000000996	147.474	0.30256	0.424833	-0.327146	0.351904	0.309684	0.411607	-0.320022	0.374434
Smurf1	ENSRNOG00000000999	3.65553	1.02603	0.253663	-0.2726	0.691594	2.19512	0.0229913	0.896499	0.286027
Trappc5	ENSRNOG00000001003	198.622	-1.15325	0.379751	0.115864	0.928517	-1.68606	0.184388	-0.416944	0.735572
Ncor2	ENSRNOG00000001004	34.0175	-0.0815332	0.909933	-0.877521	0.162537	1.23632	0.0852688	0.440337	0.520278
Nptx2	ENSRNOG00000001006	14.0468	1.53695	0.0887125	0.888451	0.239234	0.867757	0.362531	0.219258	0.790264
Bri3	ENSRNOG00000001009	35.4426	0.910133	0.30012	0.811632	0.297015	0.441598	0.630584	0.343097	0.676852
Tecpr1	ENSRNOG00000001010	9.86829	-0.463581	0.526924	-0.674288	0.333636	-0.175681	0.79761	-0.386387	0.578596
Tsc22d1	ENSRNOG00000001030	101.085	0.295576	0.345025	0.282327	0.306004	0.535993	0.0983603	0.522744	0.0863015
Ccz1b	ENSRNOG00000001032	53.5605	-0.407327	0.50501	-0.761945	0.190149	0.0700812	0.903098	-0.284537	0.62307
Nufip1	ENSRNOG00000001033	15.6627	-0.947848	0.210363	0.659492	0.29053	0.185498	0.793691	1.79284	0.0176288
Evi5l	ENSRNOG00000001034	7.76176	-2.14788	0.0382858	0.771917	0.340007	-0.461717	0.595381	2.45808	0.0145218
Gtf2h3	ENSRNOG00000001035	7.26629	0.0310812	0.95989	-0.55674	0.359286	-0.331121	0.580292	-0.918943	0.128945
Rsph10b	ENSRNOG00000001036	5.14975	0.0509769	0.956779	-0.833043	0.362579	-0.042795	0.962059	-0.926815	0.306281
Gpalpp1	ENSRNOG00000001037	5.17192	-0.525241	0.640625	-0.256797	0.818764	-1.34538	0.220884	-1.07694	0.317904
Eif2b1	ENSRNOG00000001039	40.6022	-1.48801	0.078098	2.60314	0.00366839	-2.5597	0.00572749	1.53145	0.0576459
Pms2	ENSRNOG00000001040	3.41101	-1.59911	0.0693233	-0.515729	0.523824	-1.10226	0.156551	-0.0188768	0.98124
Ddx55	ENSRNOG00000001043	3.39627	0.449183	0.641632	1.49721	0.107791	-0.596129	0.558024	0.451902	0.622238
Aimp2	ENSRNOG00000001044	23.0965	0.0790939	0.931213	-0.501151	0.486279	1.63955	0.0746181	1.0593	0.226599
Map2k7	ENSRNOG00000001047	1.46462	-1.02457	0.567479	-0.351981	0.835429	-0.577918	0.750971	0.0946719	0.955403
Tpt1	ENSRNOG00000001049	649.503	0.309767	0.382248	-0.156189	0.638817	-0.0711634	0.839036	-0.53712	0.118557
Eif2ak1	ENSRNOG00000001050	37.5303	-0.643582	0.186735	-0.252286	0.543701	0.414136	0.362843	0.805431	0.08621
Slc25a30	ENSRNOG00000001052	24.0251	0.700563	0.263495	-0.297856	0.59692	0.495166	0.429037	-0.503253	0.3935
Tmed2	ENSRNOG00000001053	121.098	-0.477441	0.205154	0.0568381	0.868796	-0.368085	0.311589	0.166194	0.635799
Rilpl1	ENSRNOG00000001055	60.1933	1.28603	0.0211091	-0.612469	0.212167	0.829641	0.130921	-1.06885	0.040208
Snapc2	ENSRNOG00000001056	10.5017	-0.348826	0.677028	2.11931	0.00748713	-0.392876	0.651464	2.07526	0.0154856
Ctxn1	ENSRNOG00000001057	219.112	0.245611	0.598892	0.196354	0.657195	-0.352257	0.454567	-0.401514	0.368204
Timm44	ENSRNOG00000001058	11.4588	0.454659	0.613065	-0.423409	0.596735	0.725066	0.415485	-0.153002	0.856991
Usp42	ENSRNOG00000001059	2.90936	-0.578764	0.356371	0.30368	0.602103	-0.565375	0.358602	0.317069	0.591523
Snrnp35	ENSRNOG00000001060	9.34568	1.29892	0.295294	-0.404274	0.734621	0.0570535	0.963643	-1.64614	0.166795
Rilpl2	ENSRNOG00000001061	40.5231	-1.24375	0.18389	2.1823	0.0248318	-2.35287	0.0203255	1.07317	0.224721
Setd8	ENSRNOG00000001062	6.41696	0.140992	0.912692	0.473697	0.715273	-1.37692	0.298098	-1.04422	0.395734
Sbno1	ENSRNOG00000001064	28.7195	-0.988199	0.145574	-0.768612	0.235042	-0.643565	0.296696	-0.423977	0.502163
Cyth3	ENSRNOG00000001065	11.6583	-1.15005	0.372007	-1.31251	0.271329	0.263753	0.816733	0.101294	0.933634
Rac1	ENSRNOG00000001068	255.7	-1.20356	0.345045	0.970331	0.471289	-3.18037	0.0181674	-1.00648	0.400609
Elavl1	ENSRNOG00000001069	9.44845	0.624559	0.240805	-0.574112	0.242333	0.565396	0.284326	-0.633275	0.210986
Cdk2ap1	ENSRNOG00000001070	59.1809	-0.00203409	0.995357	0.273491	0.419703	-0.607114	0.0949286	-0.331589	0.323717
Cers4	ENSRNOG00000001072	3.11766	-1.6998	0.209164	0.389945	0.747363	-0.869099	0.490378	1.22065	0.337931
RGD1563482	ENSRNOG00000001073	146.223	-0.372803	0.339377	-0.00930643	0.978911	-0.0848846	0.821282	0.278612	0.44946
Mphosph9	ENSRNOG00000001074	1.02577	-1.39261	0.173575	1.12714	0.243027	-1.70298	0.0897853	0.816773	0.393231
Daglb	ENSRNOG00000001079	5.87538	-0.999349	0.252311	-0.587159	0.451094	0.0781644	0.921254	0.490355	0.549529
Arl6ip4	ENSRNOG00000001080	85.2952	0.946536	0.178169	0.01083	0.986173	0.555067	0.436905	-0.380639	0.560329
Ogfod2	ENSRNOG00000001081	10.9379	-2.14418	0.218337	-0.84718	0.607823	-1.14719	0.463848	0.149809	0.926586
Abcb9	ENSRNOG00000001082	3.30278	0.538531	0.538686	-0.592099	0.422145	1.41512	0.112592	0.284494	0.729765
Kdelr2	ENSRNOG00000001083	16.2184	-0.228713	0.650314	-0.473731	0.326398	-0.22107	0.647589	-0.466088	0.33536
Vps37b	ENSRNOG00000001086	46.8932	0.611755	0.512199	0.785593	0.339093	0.376527	0.696614	0.550365	0.533348
Rfc3	ENSRNOG00000001088	1.33644	-1.0041	0.482994	0.14348	0.91496	-1.24973	0.386006	-0.102149	0.939641
Hip1r	ENSRNOG00000001091	4.35952	0.253488	0.745014	-0.401598	0.575665	0.476288	0.536968	-0.178798	0.808746
Pds5b	ENSRNOG00000001098	46.6753	0.232142	0.476566	0.437518	0.160978	-0.30758	0.355235	-0.102204	0.739813
Rbak	ENSRNOG00000001099	4.93678	1.27443	0.166102	0.651994	0.424169	0.382882	0.688085	-0.239553	0.778689
Rnf216	ENSRNOG00000001101	7.90212	-0.623004	0.414674	-0.296113	0.63309	0.997387	0.172696	1.32428	0.0754934
Sdk1	ENSRNOG00000001103	0.761882	-3.73007	0.0154797	0.928	0.513671	-2.25779	0.120795	2.40028	0.0867542
Denr	ENSRNOG00000001106	35.3939	0.0309852	0.971921	-0.670007	0.419927	0.163146	0.847344	-0.537846	0.522148
N4bp2l2	ENSRNOG00000001108	6.66653	-1.11854	0.24651	0.142365	0.871848	-0.77257	0.392695	0.488333	0.589098
Brca2	ENSRNOG00000001111	1.38244	-1.06953	0.383006	0.648753	0.579276	-1.58149	0.188994	0.136791	0.905472
Mmd2	ENSRNOG00000001113	161.014	0.195432	0.622525	-0.328321	0.349874	0.813297	0.0481806	0.289545	0.443094
Wipi2	ENSRNOG00000001114	18.8994	-0.142114	0.862587	-0.113548	0.882395	-0.069073	0.931275	-0.040507	0.958521
Slc29a4	ENSRNOG00000001115	8.10021	-2.93715	0.13263	-0.507581	0.789027	-2.25609	0.195368	0.173478	0.923397
Med13l	ENSRNOG00000001120	45.1593	-0.471969	0.146906	0.121278	0.665589	0.13947	0.651388	0.732717	0.022756
Rnft2	ENSRNOG00000001124	19.2359	0.0816404	0.889757	0.579581	0.26955	0.279791	0.639812	0.777731	0.173601
Fbxw8	ENSRNOG00000001126	7.29504	0.201994	0.839515	0.767109	0.441483	-1.1743	0.257519	-0.609185	0.521521
Tesc	ENSRNOG00000001128	29.1324	-0.874868	0.337248	-0.38991	0.631979	-0.0655215	0.938033	0.419437	0.624906
Fbxo21	ENSRNOG00000001129	5.50712	-1.44759	0.392939	1.85935	0.256777	-2.57512	0.130996	0.731825	0.646633
Nos1	ENSRNOG00000001130	2.4845	-2.36535	0.241927	0.881506	0.660146	-3.74682	0.0535714	-0.499962	0.790886
Rfc5	ENSRNOG00000001134	11.9722	-0.92033	0.325234	-0.0455612	0.955571	-0.0365638	0.966439	0.838205	0.344425
Wsb2	ENSRNOG00000001135	71.5528	-0.264697	0.70277	-0.473709	0.438297	0.659513	0.32577	0.450502	0.494809
Pebp1	ENSRNOG00000001136	656.853	0.327728	0.349256	0.00117257	0.996742	1.18556	0.00254138	0.859007	0.0152096
Taok3	ENSRNOG00000001138	107.733	0.997442	0.0853628	0.587508	0.269281	-0.0713293	0.902922	-0.481264	0.36814
Suds3	ENSRNOG00000001139	63.0003	-0.372197	0.575576	-0.49892	0.387894	0.725164	0.253705	0.59844	0.345633
Srrm4	ENSRNOG00000001141	0.538629	-1.59757	0.273587	-0.709053	0.615609	0.453202	0.759616	1.34172	0.330767
Prkab1	ENSRNOG00000001142	4.34127	2.90928	0.00993503	-0.633993	0.469994	3.3275	0.00485161	-0.215778	0.824443
Cit	ENSRNOG00000001143	3.03504	-0.282709	0.726039	0.16055	0.831288	-0.514154	0.513885	-0.0708951	0.926114
Rplp0	ENSRNOG00000001148	83.3258	-0.260505	0.626805	0.0760559	0.873551	0.178646	0.73313	0.515207	0.315246
Pxn	ENSRNOG00000001149	3.63545	-0.379517	0.682779	0.173619	0.839355	-0.200817	0.825578	0.35232	0.689153
Sirt4	ENSRNOG00000001151	1.41962	-1.12197	0.48601	-1.14515	0.457793	0.844474	0.60213	0.821301	0.589906
Msi1	ENSRNOG00000001156	11.3266	0.384233	0.664425	-0.862333	0.260485	1.25418	0.159426	0.00761355	0.992722
Abcg1	ENSRNOG00000001158	19.2126	1.26637	0.0322269	-0.785881	0.128876	1.23998	0.0388648	-0.812266	0.134377
LOC100910137	ENSRNOG00000001160	12.9286	-0.502522	0.562341	0.163681	0.83372	-0.113737	0.891376	0.552466	0.502471
Gatc	ENSRNOG00000001161	20.637	-0.535018	0.305244	-0.439569	0.377094	-0.492616	0.317583	-0.397167	0.420616
Srsf9	ENSRNOG00000001163	3.77309	0.265904	0.834733	-0.662447	0.571892	0.636785	0.608731	-0.291566	0.809454
Slc37a1	ENSRNOG00000001169	3.56556	-1.25624	0.181436	-1.48072	0.0948158	0.0137768	0.986411	-0.210705	0.810274
Cox6a1	ENSRNOG00000001170	261.184	-0.356386	0.441837	-0.730881	0.0815267	0.764559	0.0916715	0.390064	0.375613
Coq5	ENSRNOG00000001171	18.8598	-0.182937	0.852071	0.300773	0.751726	-0.732199	0.458835	-0.248489	0.789531
Rnf10	ENSRNOG00000001172	28.5152	0.286456	0.632562	-0.248302	0.642732	0.591308	0.323607	0.0565502	0.920401
Cabp1	ENSRNOG00000001173	44.1638	0.765134	0.430819	0.0243117	0.977283	0.790045	0.430144	0.0492227	0.956986
Pde9a	ENSRNOG00000001174	13.2024	0.199151	0.738326	1.02699	0.0691268	-0.30069	0.627206	0.527151	0.356088
Acads	ENSRNOG00000001177	3.24259	0.622267	0.721454	1.57311	0.343248	-0.359472	0.835949	0.591368	0.720983
Sppl3	ENSRNOG00000001178	50.879	0.0594076	0.901274	-0.152042	0.720284	0.546962	0.255871	0.335512	0.462568
Wdr4	ENSRNOG00000001181	2.67439	-1.70733	0.353772	-1.61282	0.354314	-0.7516	0.665637	-0.657094	0.704388
Ndufv3	ENSRNOG00000001182	79.241	-0.760014	0.164449	0.937465	0.0614941	-0.507957	0.339829	1.18952	0.0274722
Pknox1	ENSRNOG00000001184	12.6119	-1.57009	0.357373	-1.07594	0.422623	1.15801	0.427243	1.65216	0.307815
RGD1311899	ENSRNOG00000001185	326.363	0.0326467	0.932399	-0.517565	0.145455	0.603636	0.118731	0.0534244	0.883588
Oasl	ENSRNOG00000001187	4.72377	-0.367274	0.587701	0.136189	0.816834	0.334397	0.613489	0.83786	0.199379
Sik1	ENSRNOG00000001189	7.33421	0.0437089	0.949562	-0.439533	0.485797	0.360638	0.593789	-0.122603	0.851619
Git2	ENSRNOG00000001190	29.7747	-0.0419661	0.952828	-0.865065	0.21122	0.0275938	0.967633	-0.795505	0.246216
Tchp	ENSRNOG00000001191	2.92577	-1.19188	0.176633	-0.167098	0.823913	0.132451	0.86868	1.15723	0.167072
Gltp	ENSRNOG00000001192	58.0683	-0.916937	0.405929	0.453353	0.611917	0.490328	0.640242	1.86062	0.0827961
Rrp1b	ENSRNOG00000001194	2.55973	1.38721	0.206147	-1.51068	0.17043	0.378448	0.723164	-2.51944	0.0213321
Pop5	ENSRNOG00000001199	23.0115	0.0758544	0.954088	1.09945	0.34608	-0.00442054	0.997389	1.01918	0.417974
Cstb	ENSRNOG00000001201	224.522	-0.499486	0.370844	0.19549	0.693949	-0.0726006	0.891875	0.622376	0.243126
Rrp1	ENSRNOG00000001203	11.038	-1.32978	0.22833	0.0731793	0.942621	-0.852794	0.399559	0.550163	0.594585
Ankrd13a	ENSRNOG00000001204	7.64796	0.625905	0.471116	-1.13328	0.13593	1.64171	0.0641141	-0.11748	0.885411
Agpat3	ENSRNOG00000001205	18.9344	-0.0798622	0.821512	-0.139341	0.659384	0.379197	0.282407	0.319719	0.345887
Pwp2	ENSRNOG00000001210	5.73041	1.59635	0.040847	-0.395471	0.556253	1.04559	0.187872	-0.946237	0.186606
RGD1303003	ENSRNOG00000001211	41.6013	0.815617	0.250404	-0.233605	0.731682	-0.186514	0.792106	-1.23574	0.0735897
Pfkl	ENSRNOG00000001214	26.9929	-0.48597	0.343429	-0.0364075	0.931143	0.784171	0.120242	1.23373	0.0170509
RGD1309594	ENSRNOG00000001215	31.1067	-0.0668822	0.920812	0.305097	0.58928	0.683997	0.308773	1.05598	0.108174
Ube2g2	ENSRNOG00000001222	34.5136	-1.12477	0.156976	-0.31936	0.622227	0.419927	0.55397	1.22534	0.106257
Pttg1ip	ENSRNOG00000001223	19.138	-1.09354	0.105463	-0.270351	0.630558	0.204699	0.733112	1.02789	0.10836
Itgb2	ENSRNOG00000001224	1.15677	0.547077	0.512846	0.274338	0.720305	0.336868	0.687947	0.0641288	0.935162
Fam207a	ENSRNOG00000001225	4.49322	-0.35985	0.683064	-0.692905	0.403377	-0.0165801	0.984185	-0.349634	0.676238
Adarb1	ENSRNOG00000001227	16.5618	-0.608266	0.245671	0.436735	0.327648	0.173489	0.727036	1.21849	0.0200794
Pofut2	ENSRNOG00000001228	20.5418	-1.86196	0.235606	0.302521	0.804199	0.247551	0.856867	2.41203	0.10903
Slc19a1	ENSRNOG00000001232	0.563966	-1.75477	0.201406	-1.80395	0.170584	0.360961	0.795077	0.311784	0.807001
Gna12	ENSRNOG00000001235	9.11823	-0.447547	0.547217	0.303436	0.632502	0.390976	0.588313	1.14196	0.114465
Brat1	ENSRNOG00000001236	11.9011	0.730316	0.3413	0.914018	0.222396	-0.545197	0.50111	-0.361496	0.61711
Cabin1	ENSRNOG00000001237	16.7651	0.491784	0.570465	-0.509114	0.473179	1.77751	0.0481757	0.77661	0.344913
Rsrc2	ENSRNOG00000001238	42.2824	0.0762128	0.856436	-0.43515	0.265706	0.409709	0.327161	-0.101654	0.799224
Ddt	ENSRNOG00000001239	304.281	0.607277	0.548358	0.436428	0.638799	0.109948	0.915013	-0.0609014	0.94916
Gstt3	ENSRNOG00000001242	4.27938	1.04919	0.439862	-0.841379	0.458125	2.46468	0.0711203	0.574106	0.652439
Zcchc8	ENSRNOG00000001243	3.39194	0.159906	0.837625	-1.76765	0.0185127	1.35761	0.0739037	-0.569951	0.445063
Pcbp3	ENSRNOG00000001245	13.264	-2.35082	0.0362699	1.11744	0.267161	-2.00278	0.0545464	1.46549	0.155921
Clip1	ENSRNOG00000001247	74.6703	0.430765	0.497073	0.46393	0.410219	0.469138	0.469389	0.502303	0.404621
Chst12	ENSRNOG00000001252	2.09694	-0.212687	0.852215	1.07163	0.319616	-0.513611	0.65627	0.770706	0.479447
Eif3b	ENSRNOG00000001253	8.34887	-0.509937	0.504788	1.3222	0.0826414	-1.27242	0.11109	0.559718	0.441235
Mlxip	ENSRNOG00000001255	7.44537	2.40133	0.321763	1.15529	0.622543	-1.90369	0.449498	-3.14973	0.175983
Atxn2	ENSRNOG00000001256	41.06	-0.690516	0.224568	0.216344	0.677553	-0.522581	0.336353	0.38428	0.470715
Snx8	ENSRNOG00000001258	2.21203	0.191216	0.846152	0.862882	0.371208	-0.883	0.384839	-0.211334	0.821206
Cux2	ENSRNOG00000001259	7.46681	-3.59778	0.0146763	-0.510746	0.671895	-1.5162	0.181686	1.57084	0.238963
Nudt1	ENSRNOG00000001260	0.413729	-1.24199	0.217195	-1.87239	0.0595173	0.279873	0.786198	-0.350528	0.708642
Mad1l1	ENSRNOG00000001265	0.916894	-2.54767	0.141704	0.134045	0.932809	-1.83586	0.298315	0.845855	0.597968
Ppp1cc	ENSRNOG00000001269	390.304	-0.398919	0.225933	0.155642	0.574943	0.411131	0.200915	0.965692	0.00466973
Card6	ENSRNOG00000001271	3.76388	0.760996	0.201954	-0.278386	0.60335	0.566798	0.342863	-0.472585	0.397487
Mcm3ap	ENSRNOG00000001272	6.92768	-1.0875	0.100114	-0.489299	0.429253	-0.782862	0.195512	-0.184662	0.761013
Psmg3	ENSRNOG00000001273	41.3013	0.373243	0.641113	0.208467	0.760635	0.825169	0.316589	0.660393	0.386321
Vps29	ENSRNOG00000001274	136.841	-0.326132	0.423208	-0.124719	0.737106	-0.0647666	0.869022	0.136646	0.721698
Pcnt	ENSRNOG00000001276	4.09946	-0.554685	0.37724	-0.927803	0.103739	0.586268	0.318123	0.21315	0.718364
Mafk	ENSRNOG00000001277	11.4432	0.862581	0.230215	-0.1795	0.772273	0.871419	0.233917	-0.170662	0.798364
Gpn3	ENSRNOG00000001278	21.928	-0.484734	0.585404	-0.754034	0.374323	-0.0364324	0.965013	-0.305732	0.716808
Anapc7	ENSRNOG00000001283	151.602	1.19428	0.0919712	-0.370244	0.552571	0.911118	0.202758	-0.653409	0.318739
Atp2a2	ENSRNOG00000001285	117.493	0.104348	0.649338	0.0834106	0.692497	0.0169625	0.940687	-0.00397476	0.985388
LOC498154	ENSRNOG00000001289	9.68341	0.922065	0.312642	0.54933	0.507733	0.157914	0.867514	-0.214821	0.801838
Get4	ENSRNOG00000001293	52.1739	0.706218	0.176136	-0.431756	0.352034	0.800895	0.13188	-0.33708	0.487724
Ift81	ENSRNOG00000001294	13.5607	2.0082	0.212522	0.0694297	0.960673	0.921487	0.578904	-1.01729	0.499185
S100b	ENSRNOG00000001295	277.77	-0.0111188	0.980419	-0.170842	0.675189	0.327333	0.463902	0.16761	0.696836
P2rx7	ENSRNOG00000001296	0.613881	-0.578926	0.714837	0.977358	0.516785	-1.15538	0.467185	0.400907	0.789525
Prmt2	ENSRNOG00000001297	9.20213	-0.239221	0.751141	0.376745	0.564839	0.336945	0.651294	0.952911	0.191217
Sun1	ENSRNOG00000001299	28.9199	0.589628	0.457871	-0.384157	0.614975	-0.0332053	0.966369	-1.00699	0.188414
P2rx4	ENSRNOG00000001300	27.4535	-0.0661195	0.94545	-0.0320115	0.967334	1.2085	0.20921	1.2426	0.182054
Adora2a	ENSRNOG00000001302	1.83678	-0.89605	0.47521	0.151919	0.892346	0.0962674	0.936839	1.14424	0.338772
Specc1l	ENSRNOG00000001303	9.98575	-0.320813	0.620066	0.0854024	0.888628	-0.495312	0.436586	-0.0890966	0.884287
Bcr	ENSRNOG00000001304	18.5653	0.27951	0.615051	-0.0891962	0.859252	0.267702	0.628828	-0.101003	0.847536
Camkk2	ENSRNOG00000001309	78.6103	1.42634	0.0297672	-1.161	0.0651083	0.522768	0.398832	-2.06458	0.00197423
Rab36	ENSRNOG00000001311	48.5934	0.162493	0.779637	0.385965	0.481926	-0.269352	0.647718	-0.0458803	0.933574
Pdgfa	ENSRNOG00000001312	25.8055	-1.08241	0.0854916	-0.618381	0.24179	0.370727	0.501355	0.834757	0.156911
Gnaz	ENSRNOG00000001313	21.385	0.206262	0.673258	-0.0397817	0.928857	0.177348	0.715987	-0.0686958	0.881995
Fam20c	ENSRNOG00000001314	13.7061	0.396555	0.550822	0.0776628	0.893712	0.52429	0.435453	0.205397	0.74327
Anapc5	ENSRNOG00000001316	40.3792	-0.269378	0.664088	-0.481702	0.402561	0.0635709	0.914722	-0.148753	0.800211
Zfp68	ENSRNOG00000001317	6.49728	0.710455	0.218691	0.322109	0.547893	-0.111888	0.848229	-0.500234	0.357209
Zfp157	ENSRNOG00000001323	6.13909	1.08182	0.214263	-0.22365	0.776568	0.559554	0.523449	-0.745916	0.362049
Il3ra	ENSRNOG00000001325	1.02665	-2.02429	0.101852	-3.05536	0.0121533	1.02432	0.409768	-0.00675821	0.995238
Rnf34	ENSRNOG00000001331	32.4326	0.227849	0.587407	-0.312463	0.40992	0.452609	0.280185	-0.0877037	0.824987
Zkscan1	ENSRNOG00000001335	1.01596	0.156973	0.933026	-1.89197	0.285489	0.371977	0.843933	-1.67696	0.349617
Orai1	ENSRNOG00000001336	2.74311	-0.200865	0.913011	-1.30808	0.451071	-0.0706354	0.969689	-1.17785	0.502074
Setd1b	ENSRNOG00000001337	1.94021	-4.07844	0.0483754	-0.741781	0.708381	-1.51513	0.423215	1.82152	0.332473
Hpd	ENSRNOG00000001338	0.614081	-2.5347	0.0681788	1.44284	0.251574	-2.92435	0.0416987	1.05319	0.40754
Psmd9	ENSRNOG00000001339	15.1337	-0.364965	0.682959	1.20234	0.151004	-0.703656	0.441537	0.86365	0.313666
Zfp113	ENSRNOG00000001341	2.04124	-0.563804	0.738363	2.14981	0.19041	-0.868564	0.607124	1.84505	0.2568
Aldh2	ENSRNOG00000001344	18.4937	-0.0190037	0.983726	-1.24746	0.199786	-0.597374	0.491097	-1.82583	0.0500436
Mapkapk5	ENSRNOG00000001345	20.6161	-0.50826	0.583684	-0.174897	0.828261	0.388519	0.660467	0.721882	0.413486
Cops6	ENSRNOG00000001346	71.113	0.192794	0.686093	0.0958433	0.821163	0.393504	0.414008	0.296553	0.5131
AABR07036374.1	ENSRNOG00000001347	8.64463	-0.399908	0.768117	-1.3634	0.213085	1.76238	0.165587	0.798886	0.533205
Erp29	ENSRNOG00000001348	33.7071	-0.0641191	0.938999	0.249687	0.766586	-1.20671	0.15995	-0.892899	0.268458
Mcm7	ENSRNOG00000001349	6.61176	-1.96637	0.0238741	1.37036	0.053853	-0.652342	0.396891	2.68439	0.00214601
Naa25	ENSRNOG00000001350	7.97342	-1.91517	0.0408094	0.114434	0.888194	-1.15201	0.156164	0.877599	0.305009
Trafd1	ENSRNOG00000001351	16.3228	-0.60661	0.247426	0.671622	0.173122	-0.854879	0.10446	0.423353	0.390956
Hectd4	ENSRNOG00000001352	4.95018	-0.492662	0.559055	-1.13794	0.159993	0.0665222	0.931337	-0.578756	0.472011
Ap4m1	ENSRNOG00000001353	1.58793	-1.17448	0.432026	1.11313	0.429281	-2.60615	0.0849949	-0.318539	0.820957
Taf6	ENSRNOG00000001355	20.1405	1.52225	0.0969207	0.0232068	0.978655	-0.0828684	0.929313	-1.58191	0.0713094
Mblac1	ENSRNOG00000001357	6.17891	0.384834	0.721522	0.568706	0.596232	-1.00519	0.364809	-0.821315	0.425473
Rph3a	ENSRNOG00000001368	7.27141	-1.37237	0.341707	-0.241061	0.863617	-1.52936	0.251224	-0.398049	0.769482
Rasal1	ENSRNOG00000001374	6.69834	0.0979399	0.881193	0.0136691	0.980035	0.965926	0.146844	0.881656	0.164506
Gal3st4	ENSRNOG00000001375	3.02396	0.0656009	0.969823	-4.6713	0.00599901	1.08398	0.536235	-3.65292	0.0361959
Mettl7a	ENSRNOG00000001376	6.45661	-2.43681	0.0467843	0.215102	0.831172	-0.672688	0.520863	1.97922	0.0851553
Ddx54	ENSRNOG00000001377	1.05206	-0.494028	0.578498	-1.97198	0.0245028	0.350725	0.675109	-1.12723	0.190545
Cyp3a9	ENSRNOG00000001379	0.880105	-0.926289	0.498449	1.19634	0.374634	0.111455	0.934934	2.23409	0.0953289
Plbd2	ENSRNOG00000001385	6.81233	-0.303766	0.720286	-1.47789	0.057015	1.04785	0.188377	-0.126275	0.875237
LOC100910540	ENSRNOG00000001387	14.6052	1.72883	0.127156	0.775274	0.431824	0.815638	0.497083	-0.137914	0.894978
Mospd3	ENSRNOG00000001396	5.93705	-2.4785	0.0790566	1.01081	0.442256	-1.68297	0.218238	1.80635	0.170121
Rbm19	ENSRNOG00000001397	1.03728	2.49011	0.0380595	-0.496642	0.626253	3.77399	0.00206829	0.78723	0.466651
Lrch4	ENSRNOG00000001402	1.86992	-1.35107	0.313037	2.39553	0.0712274	-3.02232	0.0304253	0.72428	0.564985
Agfg2	ENSRNOG00000001404	29.1515	0.311752	0.596553	0.111081	0.829913	0.651358	0.27471	0.450687	0.421158
Actl6b	ENSRNOG00000001408	28.535	-1.43314	0.091874	0.00416626	0.995499	-0.589037	0.439265	0.848272	0.282813
Gnb2	ENSRNOG00000001409	91.1234	-0.100729	0.833714	0.370892	0.383042	0.343859	0.474612	0.815481	0.0844888
Gigyf1	ENSRNOG00000001410	10.1802	0.685198	0.391113	-0.189026	0.775838	1.24884	0.132664	0.374615	0.616994
Ap1s1	ENSRNOG00000001415	248.381	-0.268204	0.685099	0.647967	0.243761	0.715838	0.280604	1.63201	0.0155246
LOC100909521	ENSRNOG00000001416	13.7424	-0.351805	0.706237	0.721858	0.381207	0.0105526	0.990959	1.08422	0.227896
Plod3	ENSRNOG00000001417	1.46582	-2.20432	0.0993879	1.41202	0.25528	-1.20938	0.358892	2.40696	0.0607202
Znhit1	ENSRNOG00000001418	14.6754	1.10908	0.224002	-0.612238	0.450449	1.18372	0.205106	-0.537604	0.52804
Cldn15	ENSRNOG00000001419	21.3628	1.06676	0.107812	0.641379	0.28578	0.149429	0.826197	-0.275948	0.65116
Fis1	ENSRNOG00000001420	62.8015	0.356072	0.492874	-1.15967	0.0162323	1.39107	0.0110473	-0.12467	0.798539
Cux1	ENSRNOG00000001424	0.999361	-0.465441	0.775446	0.828766	0.587713	0.210323	0.898159	1.50453	0.336552
Prkrip1	ENSRNOG00000001426	12.3761	-0.328924	0.581878	-0.0956833	0.865951	-0.562439	0.33599	-0.329198	0.561665
Orai2	ENSRNOG00000001427	20.8016	0.127461	0.792615	0.484951	0.270265	0.207803	0.671184	0.565294	0.227115
Alkbh4	ENSRNOG00000001428	5.06065	-3.51862	0.0363332	-4.67337	0.00305069	1.33457	0.333087	0.179816	0.905475
Lrwd1	ENSRNOG00000001429	2.54651	-1.71348	0.155989	-0.744594	0.475926	0.518118	0.635462	1.487	0.192756
Polr2j	ENSRNOG00000001430	125.534	0.0395409	0.968954	-1.50552	0.148139	0.051579	0.956584	-1.49348	0.133403
Dtx2	ENSRNOG00000001432	1.23721	-0.0868157	0.948828	-1.17053	0.345361	1.19083	0.364972	0.107122	0.933473
Ywhag	ENSRNOG00000001436	392.909	-0.0191008	0.935346	-0.177123	0.413015	0.15205	0.514007	-0.00597286	0.978654
RGD1307391	ENSRNOG00000001439	25.4723	-0.603081	0.590479	0.154703	0.884324	-0.788922	0.471989	-0.0311378	0.976551
Mdh2	ENSRNOG00000001440	992.656	0.351655	0.638078	0.833616	0.221644	0.167301	0.827955	0.649263	0.363567
Tmem120a	ENSRNOG00000001441	38.6956	0.188183	0.844932	0.481311	0.578283	0.109984	0.909788	0.403112	0.659031
Por	ENSRNOG00000001442	11.6121	-0.321251	0.653684	0.272851	0.627645	1.07291	0.131318	1.66701	0.0207864
Rhbdd2	ENSRNOG00000001443	20.0447	-0.922687	0.147042	-0.171585	0.758282	-0.199339	0.728681	0.551763	0.35335
Hip1	ENSRNOG00000001448	14.9755	0.412899	0.543301	0.30025	0.629371	0.102583	0.881948	-0.0100664	0.987472
Pom121	ENSRNOG00000001449	23.072	0.751772	0.274842	-0.43967	0.488431	0.556768	0.419761	-0.634674	0.329529
Nsun5	ENSRNOG00000001450	5.09608	-0.825228	0.416053	0.176694	0.852765	-0.676445	0.489942	0.325477	0.733529
Fzd9	ENSRNOG00000001452	0.88298	-0.51322	0.731585	-2.36388	0.110367	2.69472	0.0820256	0.84406	0.55332
Baz1b	ENSRNOG00000001453	27.2139	0.025932	0.956002	-0.0941994	0.82268	0.428491	0.360494	0.30836	0.491404
Eif4h	ENSRNOG00000001454	58.5276	-0.316149	0.425658	0.181926	0.607578	0.0521185	0.892357	0.550193	0.151363
Kif13a	ENSRNOG00000001455	1.31624	-0.45245	0.707948	0.65137	0.50312	1.07894	0.365121	2.18277	0.0658449
Nup153	ENSRNOG00000001456	2.89983	0.237755	0.704316	-1.31631	0.0289626	1.0017	0.101953	-0.552361	0.357587
Rfc2	ENSRNOG00000001457	16.1724	0.0228998	0.987095	-1.03203	0.430818	0.8763	0.516211	-0.178634	0.89432
Ids	ENSRNOG00000001465	4.3565	-1.13394	0.490364	0.150041	0.926299	-1.92328	0.228054	-0.639298	0.680614
Eln	ENSRNOG00000001469	0.504375	1.30902	0.395469	-1.58299	0.274413	0.49624	0.745466	-2.39577	0.109859
Limk1	ENSRNOG00000001470	11.4944	-0.269626	0.854231	-0.299294	0.830828	-0.305172	0.827941	-0.33484	0.810194
Wbscr28	ENSRNOG00000001474	1.44544	-0.636736	0.619148	0.20075	0.872026	0.580984	0.65169	1.41847	0.249874
Gtf2i	ENSRNOG00000001479	76.7388	0.190214	0.78254	-0.295299	0.622176	0.945207	0.174273	0.459694	0.483132
Ncf1	ENSRNOG00000001480	7.32762	-1.39719	0.10222	-1.4291e-05	0.999983	0.548271	0.465784	1.94545	0.0201246
Gtf2ird2	ENSRNOG00000001482	1.92837	-1.97959	0.179566	-1.0157	0.461043	-0.791685	0.56507	0.1722	0.899792
Wbscr16	ENSRNOG00000001483	8.28946	0.453087	0.508163	-0.406507	0.5141	0.547102	0.421287	-0.312492	0.629293
Psmb1	ENSRNOG00000001488	188.791	0.307464	0.325808	0.286783	0.316562	0.0772659	0.805007	0.0565852	0.846864
Tbp	ENSRNOG00000001489	17.8008	0.570821	0.441553	0.395726	0.577195	-0.39408	0.603597	-0.569174	0.419142
Pdcd2	ENSRNOG00000001490	33.6477	-0.0380024	0.968358	0.216737	0.803418	0.0343413	0.971229	0.289081	0.750565
Slc8a2	ENSRNOG00000001492	12.4186	-0.896428	0.0957339	0.190547	0.686831	-0.474151	0.345624	0.612823	0.221865
Kptn	ENSRNOG00000001493	20.7675	-0.177723	0.893158	-0.0174715	0.986877	1.12976	0.382497	1.29001	0.306445
Napa	ENSRNOG00000001494	161.916	-0.0701271	0.904538	0.12111	0.817414	0.21514	0.710451	0.406377	0.466377
Rab4b	ENSRNOG00000001500	15.7687	1.57228	0.0528406	0.371214	0.601369	0.65781	0.430154	-0.54326	0.462207
Snrpa	ENSRNOG00000001501	8.50272	-2.70362	0.00944312	0.410118	0.653314	-2.03075	0.0271299	1.08299	0.239803
Tmem35	ENSRNOG00000001506	114.474	-0.132242	0.778336	-0.379418	0.37712	0.310163	0.499019	0.0629868	0.887472
Rapgef4	ENSRNOG00000001516	20.5357	-0.666336	0.43504	0.0301342	0.966447	0.331427	0.681354	1.0279	0.208649
Pdk1	ENSRNOG00000001517	13.9155	-0.278915	0.730118	0.0508548	0.948489	-0.800334	0.316698	-0.470564	0.540924
Itga6	ENSRNOG00000001518	2.77898	1.29826	0.144039	-0.627935	0.458292	0.345102	0.694303	-1.58109	0.0652881
Dlx1	ENSRNOG00000001520	5.54773	0.803459	0.385106	0.697829	0.458263	-1.29006	0.183518	-1.39569	0.119371
Hat1	ENSRNOG00000001524	7.01539	0.149537	0.839752	-0.992964	0.161308	0.499388	0.484198	-0.643113	0.364765
Igsf11	ENSRNOG00000001525	114.425	-1.73657	0.201749	0.968845	0.480022	-2.81786	0.0405432	-0.112446	0.928821
Cd80	ENSRNOG00000001527	1.73539	0.563815	0.478625	0.172215	0.818499	-0.124988	0.875468	-0.516588	0.493619
Gap43	ENSRNOG00000001528	444.031	0.226537	0.502305	0.0691373	0.813545	0.612521	0.0795691	0.455121	0.162797
Chac2	ENSRNOG00000001531	2.00912	-0.388094	0.704984	-0.720377	0.448298	0.671106	0.503778	0.338822	0.727443
Agps	ENSRNOG00000001547	0.879348	-2.79715	0.00615756	-0.302773	0.735743	-1.88314	0.0520511	0.611243	0.486287
Nfe2l2	ENSRNOG00000001548	1.61439	-1.43302	0.242633	-0.912632	0.428204	-0.81077	0.495856	-0.290384	0.799509
Atp5j	ENSRNOG00000001551	45.6935	-0.35411	0.503002	0.14944	0.758229	-0.347406	0.500149	0.156143	0.754446
Btg3	ENSRNOG00000001555	46.7305	-0.148145	0.886501	1.05495	0.243652	0.0530374	0.95947	1.25613	0.209854
Cxadr	ENSRNOG00000001557	4.0844	-2.0995	0.163571	-0.00251168	0.998637	-2.68526	0.0637369	-0.588274	0.673502
Mtx2	ENSRNOG00000001559	38.7053	-0.24205	0.72753	-0.344314	0.617389	-0.783808	0.24819	-0.886071	0.188361
Usp25	ENSRNOG00000001573	10.6891	-0.0861257	0.864315	-1.09835	0.0390261	-0.299257	0.530933	-1.31148	0.0119884
Grik1	ENSRNOG00000001575	2.34415	-0.84707	0.459753	1.57807	0.131505	-0.780453	0.492916	1.64468	0.13846
Nrip1	ENSRNOG00000001585	2.52036	0.597742	0.236822	-0.247114	0.6041	-0.00483584	0.99226	-0.849692	0.0829477
Cct8	ENSRNOG00000001592	59.6965	0.393685	0.317741	-0.110948	0.769539	-0.393678	0.317188	-0.898311	0.0232469
Lnp	ENSRNOG00000001593	3.66748	-0.458666	0.680273	1.27577	0.251684	-2.00183	0.0865523	-0.267391	0.799691
Atp5g3	ENSRNOG00000001596	256.989	-0.16145	0.620034	-0.0465171	0.880866	-0.484432	0.139028	-0.369499	0.239024
Atf2	ENSRNOG00000001597	10.6861	-0.276252	0.737932	1.07743	0.206295	-1.82399	0.0412099	-0.47031	0.548839
Usp16	ENSRNOG00000001598	4.71129	-0.710832	0.435395	-2.1896	0.0189428	0.451315	0.569014	-1.02745	0.243638
Rwdd2b	ENSRNOG00000001599	6.03869	-1.87039	0.0711386	-0.413469	0.627981	-0.124726	0.885857	1.33219	0.169166
Ltn1	ENSRNOG00000001602	14.3511	0.0817878	0.879671	0.230923	0.639437	0.0574111	0.915455	0.206547	0.687297
N6amt1	ENSRNOG00000001603	12.7706	-0.20268	0.888402	1.19611	0.431106	-2.5152	0.0998308	-1.11641	0.417087
Adamts1	ENSRNOG00000001607	0.37419	-2.08449	0.193103	-0.260283	0.866761	0.562451	0.728007	2.38666	0.119794
Nxpe3	ENSRNOG00000001608	7.74919	0.13217	0.879351	-0.485582	0.535346	0.575649	0.501762	-0.0421029	0.959293
Cep97	ENSRNOG00000001609	7.08617	-1.84602	0.14852	2.72045	0.0319213	-2.82481	0.0335288	1.74165	0.150632
Rpl24	ENSRNOG00000001611	232.643	0.238361	0.604539	0.307119	0.472884	-0.163718	0.723179	-0.0949601	0.827292
Zbtb11	ENSRNOG00000001613	9.92037	0.400618	0.442601	-0.883369	0.0899112	0.125883	0.802263	-1.1581	0.0274671
Senp7	ENSRNOG00000001616	4.36222	0.482039	0.593256	-0.0226623	0.98139	-1.93033	0.0405065	-2.43503	0.00876089
Prdm15	ENSRNOG00000001620	4.91716	-2.80792	0.0403316	-0.00849961	0.993035	0.0781259	0.941717	2.87755	0.0277678
C2cd2	ENSRNOG00000001621	1.5785	-0.352548	0.638764	-1.26441	0.0744692	0.671319	0.341056	-0.240545	0.735737
Zfp295	ENSRNOG00000001623	8.52688	0.0351786	0.947962	-0.432229	0.400069	-0.0555871	0.915474	-0.522995	0.313263
Pcp4	ENSRNOG00000001628	186.578	1.48517	0.0494985	-1.60339	0.0336463	0.603841	0.395183	-2.48472	0.00151558
Wrb	ENSRNOG00000001629	57.9909	0.392529	0.531746	0.9595	0.112738	-0.36407	0.575048	0.2029	0.732517
Brwd1	ENSRNOG00000001632	6.15859	-0.738237	0.213573	-0.0848814	0.880033	-0.868596	0.129848	-0.21524	0.697097
Tfg	ENSRNOG00000001633	6.8398	0.388587	0.59976	0.565917	0.406875	-0.136188	0.857321	0.0411415	0.953124
Tomm70a	ENSRNOG00000001640	2.43522	-0.877477	0.430874	0.103757	0.92291	-1.25767	0.250902	-0.276436	0.792164
Tbc1d23	ENSRNOG00000001642	20.8671	0.721717	0.143347	-0.337509	0.45	0.415028	0.39305	-0.644197	0.167075
Psmg1	ENSRNOG00000001643	30.3042	-1.37115	0.0586677	0.923781	0.160141	-1.3042	0.0628361	0.990727	0.142077
Ets2	ENSRNOG00000001647	22.2145	-0.0109845	0.982551	-0.699679	0.145089	0.254744	0.599772	-0.433951	0.36796
St3gal6	ENSRNOG00000001653	2.17715	-1.34487	0.248812	0.497328	0.636229	-0.39374	0.726603	1.44846	0.192524
Cpox	ENSRNOG00000001654	4.86945	-1.14783	0.133128	0.958608	0.16889	-0.950936	0.196991	1.15551	0.112282
Cldnd1	ENSRNOG00000001657	40.2887	0.371527	0.338528	-0.293499	0.420895	0.0876233	0.819036	-0.577403	0.124257
Kcnj6	ENSRNOG00000001658	8.31435	1.06246	0.372356	-0.316404	0.767305	0.539004	0.652443	-0.839859	0.455494
Dyrk1a	ENSRNOG00000001662	23.9969	-0.45477	0.579387	-1.24517	0.112611	0.451447	0.550248	-0.338952	0.663755
Mina	ENSRNOG00000001680	31.5163	2.94574	0.0903021	0.108809	0.946617	0.679592	0.705558	-2.15733	0.185444
Dscr3	ENSRNOG00000001681	5.84591	-0.787915	0.298078	-0.797637	0.271622	-0.410424	0.556783	-0.420146	0.555694
Ttc3	ENSRNOG00000001682	299.052	0.0876664	0.688258	-0.19056	0.343167	0.212064	0.330138	-0.0661622	0.749253
Hlcs	ENSRNOG00000001686	1.72954	0.0388975	0.977852	0.796553	0.532596	0.302128	0.829713	1.05978	0.42879
Crybg3	ENSRNOG00000001687	1.53815	1.41399	0.153515	0.305845	0.719996	1.31326	0.196014	0.205112	0.822344
Arl6	ENSRNOG00000001689	16.1945	-0.851375	0.0731243	-0.0229222	0.956552	-0.499885	0.256029	0.328567	0.450169
Setd4	ENSRNOG00000001699	11.2943	-0.126237	0.899188	-0.591599	0.569379	-1.39043	0.152436	-1.85579	0.060503
Dfnb31	ENSRNOG00000001700	4.68711	1.09844	0.255939	-1.27569	0.163702	0.898953	0.348582	-1.47518	0.113705
Cbr3	ENSRNOG00000001701	21.8396	-0.1561	0.91123	-0.162756	0.89327	0.690757	0.611885	0.684101	0.606789
Kalrn	ENSRNOG00000001706	21.7704	-0.631182	0.206794	-0.499633	0.28375	-0.295461	0.5247	-0.163912	0.724864
Vwa5b2	ENSRNOG00000001707	2.87993	0.0544364	0.961361	-0.990988	0.300707	1.41137	0.196242	0.365947	0.730672
Dvl3	ENSRNOG00000001708	2.35743	0.283936	0.712043	-0.443766	0.521121	0.701132	0.358474	-0.02657	0.970868
Ap2m1	ENSRNOG00000001709	488.325	0.0824163	0.781375	-0.283131	0.310511	0.11505	0.693954	-0.250497	0.378415
Abcf3	ENSRNOG00000001710	11.4647	0.613712	0.477381	0.42804	0.588762	-0.00488307	0.995577	-0.190556	0.815008
Hrasls	ENSRNOG00000001711	4.58687	-0.657029	0.516162	-1.0731	0.277495	-0.512101	0.576062	-0.928171	0.339115
Alg3	ENSRNOG00000001712	1.83658	-1.0836	0.326322	-1.07967	0.288708	0.559632	0.596485	0.56356	0.587202
AABR07034532.1	ENSRNOG00000001713	0.972891	-1.8906	0.20158	-2.59517	0.0614049	1.91582	0.189299	1.21124	0.382592
Opa1	ENSRNOG00000001717	7.08571	0.194335	0.840051	0.563074	0.575551	-1.55759	0.122937	-1.18885	0.200829
Psmd2	ENSRNOG00000001719	263.699	-0.0147315	0.979424	0.225765	0.643892	0.613047	0.283422	0.853543	0.125524
Hes1	ENSRNOG00000001720	5.95873	-0.545262	0.628586	0.429143	0.709251	-1.97296	0.085623	-0.998551	0.353188
Tmem44	ENSRNOG00000001726	5.94116	0.203272	0.791048	0.437752	0.502127	0.628332	0.41669	0.862812	0.241861
Lsg1	ENSRNOG00000001727	4.32918	0.0826664	0.91502	-0.126578	0.863567	-0.343991	0.653078	-0.553236	0.454986
Fam43a	ENSRNOG00000001728	2.16829	-1.12239	0.3627	-1.34139	0.244685	0.0340975	0.975964	-0.184903	0.873377
Acap2	ENSRNOG00000001730	6.1947	-0.962895	0.136375	0.151361	0.799864	-0.921537	0.134584	0.192718	0.746686
Ppp1r2	ENSRNOG00000001733	47.6534	-0.336537	0.367919	-0.140887	0.683575	-0.233099	0.517296	-0.0374486	0.915016
Bdh1	ENSRNOG00000001736	9.66613	1.05003	0.326383	0.772907	0.450582	-0.529762	0.635418	-0.806884	0.425305
Eif4g1	ENSRNOG00000001738	2.60396	-0.0949791	0.948246	0.0117146	0.993138	-0.0860209	0.952329	0.0206728	0.988118
Mfi2	ENSRNOG00000001739	1.73821	-1.77043	0.231837	-0.402342	0.780471	-1.6191	0.239999	-0.251014	0.855712
Ncbp2	ENSRNOG00000001746	18.5785	-0.113605	0.832883	-0.262047	0.614758	-0.475686	0.370069	-0.624128	0.23061
Pak2	ENSRNOG00000001747	24.8282	-1.1531	0.113389	-0.250862	0.726321	-1.70382	0.0174183	-0.801576	0.238472
LOC100912534	ENSRNOG00000001748	73.1639	-0.185863	0.630998	0.0902389	0.803997	-0.381241	0.323897	-0.10514	0.774136
Chrd	ENSRNOG00000001750	1.77829	-0.711109	0.509644	-0.0226518	0.9788	2.13979	0.0521318	2.82825	0.010337
Wdr53	ENSRNOG00000001754	12.1768	0.441328	0.777846	0.0618704	0.969003	-0.921274	0.566312	-1.30073	0.384051
Tctex1d2	ENSRNOG00000001758	115.097	0.950349	0.0994645	-0.0589979	0.90483	0.841532	0.150668	-0.167815	0.750303
Pcyt1a	ENSRNOG00000001762	7.10937	0.245108	0.641078	0.17647	0.718971	-0.167373	0.751954	-0.236011	0.6361
Vps8	ENSRNOG00000001764	18.8361	-0.531042	0.374523	-0.249393	0.617128	0.666084	0.242763	0.947733	0.102134
Tfrc	ENSRNOG00000001766	11.5788	-0.528753	0.3222	-1.13845	0.0305777	0.146617	0.761842	-0.463075	0.361619
RGD1562339	ENSRNOG00000001767	3.66067	-1.70548	0.118877	-0.61467	0.532567	1.50582	0.162016	2.59663	0.0168047
Tnk2	ENSRNOG00000001769	9.91548	-0.504151	0.474509	-1.04855	0.0855415	1.24329	0.0655457	0.698889	0.298453
Ehhadh	ENSRNOG00000001770	3.42179	0.139561	0.815571	0.317806	0.544604	0.419962	0.486645	0.598207	0.29742
Senp2	ENSRNOG00000001773	5.31896	1.07188	0.326796	0.178014	0.857208	0.416268	0.707827	-0.477594	0.641743
Lrch3	ENSRNOG00000001774	2.39158	-2.23161	0.198068	0.358079	0.82821	-3.41875	0.0452446	-0.829062	0.607803
Lmln	ENSRNOG00000001781	1.72982	0.929119	0.226227	1.71218	0.0193425	0.0130101	0.987103	0.796071	0.273498
Osbpl11	ENSRNOG00000001782	4.69654	-0.302554	0.655263	0.207009	0.734457	-0.0518112	0.937333	0.457751	0.477941
Tra2b	ENSRNOG00000001783	42.5458	-0.471437	0.260333	-0.262875	0.48515	0.0301109	0.939325	0.238673	0.543172
Etv5	ENSRNOG00000001785	42.414	-0.0779133	0.851305	0.21383	0.560372	0.326499	0.430973	0.618243	0.127726
Snx4	ENSRNOG00000001786	44.8263	-0.981172	0.311753	0.226261	0.790509	-0.297479	0.74224	0.909954	0.322421
Zfp148	ENSRNOG00000001789	50.272	-0.148203	0.684078	0.418052	0.214587	-0.0924889	0.799109	0.473766	0.179591
Heg1	ENSRNOG00000001793	1.41126	-0.723177	0.556328	-1.55997	0.188056	0.0743572	0.946751	-0.762436	0.515569
Itgb5	ENSRNOG00000001795	6.42971	-0.532765	0.662131	-2.13763	0.04326	2.1315	0.0622964	0.526638	0.648301
Dgkg	ENSRNOG00000001796	58.7014	-1.16596	0.220028	-0.441561	0.578239	0.510217	0.553907	1.23462	0.172494
Umps	ENSRNOG00000001797	15.1026	-1.84653	0.0908525	-0.48206	0.572648	0.269622	0.76669	1.63409	0.113149
Dnajb11	ENSRNOG00000001803	11.5369	0.0204779	0.974024	0.321498	0.598059	-0.59216	0.354075	-0.29114	0.62661
Sspn	ENSRNOG00000001807	10.5389	-0.0968002	0.948411	-2.01751	0.146261	1.38467	0.317696	-0.536034	0.707025
Asun	ENSRNOG00000001808	4.66634	0.38058	0.736428	0.312496	0.773081	-0.54714	0.634478	-0.615224	0.567437
Fgfr1op2	ENSRNOG00000001811	56.716	0.474861	0.174847	0.0456342	0.885348	0.115366	0.73783	-0.313861	0.338325
Dnm1l	ENSRNOG00000001813	12.4268	-0.00199813	0.998021	0.676492	0.422899	-1.80352	0.0360451	-1.12503	0.150567
Eif4a2	ENSRNOG00000001815	332.874	0.22069	0.451148	-0.102399	0.711891	-0.22677	0.43639	-0.549859	0.0576898
Rfc4	ENSRNOG00000001816	35.3589	-2.5434	0.00438288	-0.579525	0.455033	-1.79226	0.0151271	0.171608	0.822592
Tm7sf3	ENSRNOG00000001817	23.0115	-0.497146	0.371077	0.0361358	0.945623	-0.702595	0.199265	-0.169313	0.745897
Med21	ENSRNOG00000001820	24.4448	0.678582	0.377013	0.0170996	0.981981	-0.549544	0.478217	-1.21103	0.104805
Adipoq	ENSRNOG00000001821	2.21547	-0.304049	0.668308	-0.246757	0.69245	0.560493	0.416189	0.617784	0.362196
St6gal1	ENSRNOG00000001823	2.20278	-0.372313	0.613708	-0.736368	0.303657	-0.391358	0.571909	-0.755413	0.28706
Pkp2	ENSRNOG00000001825	3.39522	1.45698	0.237049	-2.03325	0.0694522	2.39094	0.051875	-1.09928	0.343114
Masp1	ENSRNOG00000001827	2.12933	-0.748238	0.447823	-0.680553	0.476593	-0.814788	0.38091	-0.747103	0.425496
Stk38l	ENSRNOG00000001828	19.3186	-0.228667	0.738913	0.546091	0.380854	-0.0752586	0.912236	0.6995	0.288605
Ube2v2	ENSRNOG00000001829	10.9243	0.252722	0.636974	-0.615044	0.255671	-0.417493	0.425424	-1.28526	0.0186503
Mcm4	ENSRNOG00000001833	2.02634	-0.215899	0.828981	0.631755	0.528751	-1.48906	0.14638	-0.641407	0.500555
Mzt2b	ENSRNOG00000001834	23.1747	-0.377226	0.778305	0.377583	0.748697	-0.0370109	0.977274	0.717798	0.572821
Sst	ENSRNOG00000001837	95.1185	-0.538585	0.370359	0.251425	0.630834	0.120782	0.834711	0.910793	0.117704
Mrps35	ENSRNOG00000001842	23.2418	0.286183	0.589855	0.130524	0.778871	0.568159	0.292213	0.412499	0.414089
Bcl6	ENSRNOG00000001843	2.5035	1.27073	0.160946	-1.32717	0.0995757	1.79866	0.0510121	-0.799235	0.344543
Klhl42	ENSRNOG00000001844	7.42594	-0.202381	0.865685	0.156313	0.872457	1.06673	0.358468	1.42542	0.215107
Top3b	ENSRNOG00000001845	8.95266	-0.998687	0.290293	0.0149637	0.984665	0.457869	0.598827	1.47152	0.106337
Ccdc91	ENSRNOG00000001847	12.2438	-1.36227	0.0847302	0.833011	0.231844	-0.856344	0.245912	1.33894	0.0748947
Mapk1	ENSRNOG00000001849	25.5093	-1.02484	0.226314	0.45608	0.573524	-1.45765	0.0786075	0.0232728	0.976449
Far2	ENSRNOG00000001851	13.7084	0.185801	0.81012	0.291023	0.699635	-0.719638	0.360102	-0.614416	0.406178
Ergic2	ENSRNOG00000001852	69.4574	0.0827035	0.875691	0.135365	0.776396	0.155467	0.768777	0.208129	0.678434
Tmtc1	ENSRNOG00000001854	3.57396	0.219999	0.903717	-0.065979	0.970378	-0.847025	0.640865	-1.133	0.513561
Sdf2l1	ENSRNOG00000001859	15.6269	1.22004	0.252688	-0.100518	0.906154	1.8315	0.100756	0.510943	0.605849
Ydjc	ENSRNOG00000001861	5.65275	-0.326297	0.73935	-0.708697	0.416123	0.797701	0.399671	0.415301	0.655324
Ube2l3	ENSRNOG00000001862	28.9166	-0.21727	0.632875	-0.745162	0.0883912	0.131133	0.761412	-0.39676	0.362274
Tmem191c	ENSRNOG00000001864	33.234	1.14346	0.64425	2.3655	0.282036	0.796922	0.757927	2.01896	0.392887
Snap29	ENSRNOG00000001867	23.1475	0.530562	0.393284	-0.0596917	0.915188	0.449953	0.473574	-0.1403	0.810121
Lztr1	ENSRNOG00000001870	24.7359	-2.91989	0.0134799	1.00459	0.31187	-2.13535	0.0378821	1.78913	0.0961808
Slc7a4	ENSRNOG00000001874	23.3567	0.177341	0.883413	1.6279	0.180844	-1.46957	0.256505	-0.019005	0.986793
Smpd4	ENSRNOG00000001875	33.6314	0.467141	0.752015	-1.31833	0.294062	1.80042	0.216387	0.0149503	0.99144
Ccdc74a	ENSRNOG00000001876	1.86091	1.64353	0.313469	1.16228	0.453745	0.437267	0.780415	-0.0439857	0.977008
Med15	ENSRNOG00000001877	7.94415	0.2953	0.764242	0.903852	0.309008	0.169966	0.866838	0.778518	0.407891
Klhl22	ENSRNOG00000001878	21.7997	-1.06421	0.148	-0.720281	0.241842	0.55432	0.397871	0.898246	0.195195
Dgcr6	ENSRNOG00000001880	18.2261	1.20388	0.0965253	0.349612	0.580905	0.515038	0.486604	-0.33923	0.609745
RGD1565297	ENSRNOG00000001884	74.913	-0.0994199	0.892395	0.681991	0.346128	-1.05154	0.168102	-0.270126	0.698885
Trmt2a	ENSRNOG00000001885	17.0995	-0.442211	0.777341	-2.96312	0.063251	0.540303	0.683799	-1.9806	0.196884
Dgcr8	ENSRNOG00000001886	9.17181	-0.85055	0.196337	0.0519413	0.932095	-0.824648	0.193245	0.0778436	0.898638
Arvcf	ENSRNOG00000001888	10.1919	-0.0101593	0.994246	-0.325206	0.807703	-0.166842	0.904176	-0.481889	0.718939
Comt	ENSRNOG00000001889	13.4792	-0.843461	0.222083	-1.25179	0.060727	-0.0259949	0.965881	-0.434325	0.503884
Txnrd2	ENSRNOG00000001890	3.90612	-0.690809	0.517416	0.309313	0.737934	0.0939748	0.926259	1.0941	0.28365
Gnb1l	ENSRNOG00000001891	0.879013	1.9384	0.145687	0.302905	0.803223	-0.129051	0.919055	-1.76455	0.161829
AABR07034742.1	ENSRNOG00000001893	94.0057	0.515025	0.158625	-0.28255	0.410763	-0.0868098	0.806882	-0.884384	0.0156116
Map6d1	ENSRNOG00000001911	2.72625	0.0363124	0.984073	-1.08356	0.525484	-0.0807429	0.964652	-1.20062	0.48934
Chodl	ENSRNOG00000001915	1.09536	0.41825	0.791966	2.0273	0.168137	-3.16054	0.0523518	-1.5515	0.308423
Cldn1	ENSRNOG00000001926	3.6705	2.45012	0.236296	1.25206	0.529728	1.93093	0.330537	0.732873	0.704134
Il1rap	ENSRNOG00000001928	32.1444	0.958918	0.180008	0.0851974	0.889838	0.929283	0.208214	0.0555618	0.93304
Ccdc50	ENSRNOG00000001930	1.89666	-1.30107	0.284975	-1.72625	0.134987	-0.240763	0.839266	-0.665935	0.559749
Fgf12	ENSRNOG00000001931	18.9164	-0.488537	0.414423	-0.522314	0.385047	-0.963943	0.0965216	-0.997719	0.0884765
Bace2	ENSRNOG00000001953	0.820138	-1.2102	0.380597	-0.137921	0.914802	-1.20328	0.390096	-0.131002	0.919496
Dzip3	ENSRNOG00000001956	11.8572	0.218316	0.776083	0.640866	0.408543	-1.16614	0.146656	-0.743586	0.312713
Ift57	ENSRNOG00000001958	24.2358	0.826274	0.181033	-0.60381	0.309534	0.0242205	0.967705	-1.40586	0.0221803
Mx2	ENSRNOG00000001963	1.04491	0.956323	0.384344	0.111951	0.91371	0.247127	0.821135	-0.597245	0.56463
Cd47	ENSRNOG00000001964	149.682	-0.222819	0.576619	0.299258	0.418844	-0.267089	0.500012	0.254988	0.501329
Bbx	ENSRNOG00000001971	5.71397	-0.679191	0.512419	-0.972437	0.295602	0.508074	0.589921	0.214829	0.826663
Rcan1	ENSRNOG00000001979	42.6265	-0.226219	0.617174	-0.403524	0.348596	-0.161903	0.710735	-0.339208	0.432069
Cblb	ENSRNOG00000001982	3.27303	0.511853	0.428436	0.394122	0.503267	0.122515	0.852075	0.004784	0.993721
Alcam	ENSRNOG00000001989	131.82	0.388507	0.355109	-0.103003	0.790852	0.104403	0.802381	-0.387107	0.331954
Atp5o	ENSRNOG00000001991	280.15	0.00964489	0.977056	0.0579426	0.8502	0.0942997	0.77656	0.142597	0.654704
Atp6v1a	ENSRNOG00000001992	232.674	-0.110671	0.595183	-0.272725	0.166068	0.00827029	0.967371	-0.153784	0.438417
Ythdc1	ENSRNOG00000001996	14.7875	-0.374435	0.483079	-0.65644	0.194983	0.0604887	0.904868	-0.221516	0.66089
Itsn1	ENSRNOG00000002001	5.39677	0.509006	0.524835	-0.0988119	0.9017	-0.773815	0.333237	-1.38163	0.0789721
Prdm8	ENSRNOG00000002004	0.813735	-0.540083	0.663267	-0.788536	0.50391	0.696334	0.573899	0.447881	0.703327
Donson	ENSRNOG00000002012	4.6412	-0.244134	0.744493	-0.897576	0.193331	0.589421	0.409441	-0.064021	0.928155
Sidt1	ENSRNOG00000002013	30.0844	-0.864091	0.0959897	-0.558734	0.25157	-0.583894	0.219901	-0.278537	0.559684
Son	ENSRNOG00000002021	19.6519	-0.207743	0.537976	0.040601	0.895034	-0.0935365	0.776496	0.154808	0.627776
Epha5	ENSRNOG00000002024	26.1006	0.182537	0.703818	0.159577	0.718964	-0.0282493	0.953157	-0.0512101	0.910301
Dnajc28	ENSRNOG00000002026	1.65162	1.74771	0.254817	-0.444112	0.747264	-0.509669	0.730624	-2.70149	0.070831
Tmem50b	ENSRNOG00000002028	78.4739	0.499558	0.420306	0.395875	0.472241	0.463016	0.467524	0.359333	0.53924
Ifngr2	ENSRNOG00000002032	28.7966	0.172966	0.663094	0.336698	0.330623	0.574083	0.160681	0.737815	0.0604441
Paqr3	ENSRNOG00000002035	18.3294	-0.618155	0.3206	-0.396232	0.503863	-0.555725	0.34766	-0.333802	0.568837
Paxbp1	ENSRNOG00000002036	13.6004	1.01293	0.339541	0.110544	0.909315	0.340303	0.755682	-0.562086	0.57361
Evi5	ENSRNOG00000002039	20.9739	0.114491	0.801981	0.218288	0.579777	0.599503	0.198076	0.703299	0.114873
Boc	ENSRNOG00000002041	5.18487	1.03221	0.172939	-2.05354	0.00623874	1.75586	0.0211727	-1.32988	0.0697051
Gtpbp8	ENSRNOG00000002044	24.5766	2.17355	0.0127743	-1.63814	0.0300111	2.21091	0.0134983	-1.60078	0.0457848
Anxa3	ENSRNOG00000002045	2.49356	-1.18614	0.240022	0.293956	0.732211	0.00731371	0.993826	1.48741	0.124613
Igfbp7	ENSRNOG00000002050	11.3933	-0.019881	0.982679	0.564369	0.541463	-1.28443	0.176633	-0.700178	0.423586
Synj1	ENSRNOG00000002051	60.3975	-0.191303	0.51478	-0.0269362	0.91973	-0.0370707	0.896897	0.127296	0.646679
Fras1	ENSRNOG00000002053	2.05603	0.583754	0.539455	0.935951	0.277749	0.228204	0.815727	0.580401	0.520108
Glmn	ENSRNOG00000002054	57.2398	-1.74203	0.0273968	-0.0544175	0.936579	-0.937718	0.175224	0.749898	0.293534
Noa1	ENSRNOG00000002055	20.155	-0.612868	0.473162	-0.481381	0.544472	-0.162288	0.841522	-0.0308016	0.969503
Slc35a5	ENSRNOG00000002069	4.26351	0.784709	0.367408	0.812316	0.329581	-0.468669	0.602273	-0.441063	0.591028
Brdt	ENSRNOG00000002073	1.39077	-0.425748	0.772064	-1.79839	0.182888	1.0011	0.474275	-0.371535	0.789905
Cnot6l	ENSRNOG00000002075	2.54067	-0.870354	0.201415	0.234816	0.71103	-0.970592	0.139926	0.134578	0.831673
Mapk10	ENSRNOG00000002079	242.496	0.705027	0.181248	0.258916	0.577596	0.428331	0.420534	-0.0177801	0.970929
Urb1	ENSRNOG00000002080	4.10892	0.267293	0.816658	0.460545	0.698934	-1.48885	0.213785	-1.2956	0.242913
Ccng2	ENSRNOG00000002089	37.1713	0.617019	0.344349	0.493732	0.416933	-0.167566	0.80046	-0.290853	0.635512
Gtf3c3	ENSRNOG00000002091	5.06527	0.504855	0.486794	0.16341	0.815617	-0.523904	0.477695	-0.865349	0.215445
Tgfbr3	ENSRNOG00000002093	2.68636	-0.790177	0.406382	0.262919	0.759346	-0.357484	0.693421	0.695612	0.440498
Atg3	ENSRNOG00000002094	22.7339	-0.96741	0.126831	-0.204731	0.719859	-0.495586	0.394839	0.267093	0.647995
Rasl11b	ENSRNOG00000002097	44.0608	0.387127	0.391136	-0.164894	0.687416	0.378714	0.401558	-0.173308	0.683249
Srp72	ENSRNOG00000002100	36.639	0.0234902	0.948712	0.171004	0.616688	-0.226431	0.536131	-0.0789178	0.8199
Paics	ENSRNOG00000002101	11.8998	0.310141	0.654792	-0.264683	0.701197	-0.57347	0.40769	-1.14829	0.0919948
Scaf4	ENSRNOG00000002104	4.1426	-0.99376	0.227821	-0.261173	0.747441	-1.44222	0.0699424	-0.709632	0.360089
Cdc7	ENSRNOG00000002105	16.2696	-1.21183	0.420805	1.43178	0.312598	-1.44965	0.334709	1.19396	0.403419
Usp46	ENSRNOG00000002106	41.6446	0.160182	0.590354	-0.160359	0.570814	-0.197217	0.503952	-0.517758	0.0776568
Zfp644	ENSRNOG00000002112	20.2228	-0.131367	0.743895	0.170004	0.641489	0.0174558	0.964851	0.318827	0.40662
Sod1	ENSRNOG00000002115	243.5	-0.144182	0.690969	0.113574	0.744577	-0.630841	0.0895566	-0.373084	0.284674
Lrrc8d	ENSRNOG00000002121	14.7786	-0.187143	0.704103	0.00728919	0.987829	-0.715114	0.14894	-0.520682	0.272234
Lrrc8c	ENSRNOG00000002122	9.15357	-0.136947	0.840367	-0.16109	0.809031	-0.667255	0.315545	-0.691397	0.290855
Ccni	ENSRNOG00000002125	33.9499	-0.246013	0.585173	-0.102091	0.814198	-0.642464	0.154655	-0.498542	0.250244
Ncam2	ENSRNOG00000002126	10.9265	-1.5715	0.0896993	0.0425283	0.958217	-0.880163	0.286331	0.733861	0.391285
Ppat	ENSRNOG00000002128	11.0045	-0.316431	0.538823	-0.225047	0.647626	-0.483989	0.331826	-0.392605	0.423532
Lrrc8b	ENSRNOG00000002129	18.087	-0.610089	0.361825	0.249407	0.666327	0.0577355	0.928	0.917232	0.154225
Sgcb	ENSRNOG00000002135	14.0779	-2.2102	0.0136981	-0.540368	0.502664	-1.69464	0.0268766	-0.0248065	0.974923
Aasdh	ENSRNOG00000002137	4.78593	-0.0114903	0.989201	-2.25448	0.0118297	0.742061	0.336102	-1.50093	0.0759142
RGD1311575	ENSRNOG00000002139	7.4392	-1.01592	0.0515057	-0.32099	0.474767	-0.15891	0.729862	0.536024	0.262851
Cd200	ENSRNOG00000002141	32.3883	-0.534844	0.270499	0.0889446	0.840476	-0.405771	0.384296	0.218017	0.631452
Cds1	ENSRNOG00000002142	26.9042	-0.731234	0.328961	0.885827	0.19981	-0.728272	0.325303	0.888789	0.214464
Exoc1	ENSRNOG00000002144	6.06007	-0.14015	0.858201	1.45282	0.0509907	-0.405037	0.617974	1.18794	0.121994
Pkd2	ENSRNOG00000002146	8.33443	0.709334	0.358935	-0.0495618	0.948101	-0.544553	0.483393	-1.30345	0.0840987
Dcun1d4	ENSRNOG00000002152	33.8477	0.295291	0.525121	-0.222027	0.609916	0.0552422	0.903939	-0.462076	0.298984
Cep135	ENSRNOG00000002153	1.2892	1.10518	0.29027	0.792982	0.439729	-0.657344	0.54525	-0.969541	0.327363
Mepe	ENSRNOG00000002154	2.79345	-0.50224	0.751819	-0.0997611	0.944696	0.551178	0.724019	0.953657	0.528134
Ibsp	ENSRNOG00000002158	1.04265	0.217734	0.873729	0.75796	0.559304	-0.969879	0.478727	-0.429653	0.741257
Agpat9	ENSRNOG00000002159	18.0383	-0.636697	0.524736	-1.36545	0.178414	-0.463669	0.607939	-1.19242	0.217928
Klf3	ENSRNOG00000002163	45.3701	-0.641211	0.302293	0.637461	0.257631	-0.354764	0.558051	0.923908	0.123511
Nmu	ENSRNOG00000002164	3.23593	-2.55936	0.116732	0.974192	0.513492	-2.49372	0.132714	1.03983	0.490098
Cwh43	ENSRNOG00000002174	0.722951	-0.300441	0.79935	1.15791	0.290942	-3.35987	0.00851449	-1.90152	0.101644
Clock	ENSRNOG00000002175	8.46952	-0.536684	0.250556	0.0169629	0.967874	-0.211205	0.634628	0.342442	0.435283
Pvrl3	ENSRNOG00000002176	4.93881	0.184041	0.897483	-3.29196	0.0235682	0.220104	0.872058	-3.2559	0.0250842
Gnpda2	ENSRNOG00000002177	4.38619	-0.667847	0.477275	-0.360122	0.689233	-0.60802	0.495954	-0.300295	0.735202
Mrps18c	ENSRNOG00000002178	9.57212	0.459518	0.646734	0.547754	0.579297	-0.948382	0.358437	-0.860146	0.36953
Tbc1d1	ENSRNOG00000002180	10.1377	-0.16138	0.789906	0.471184	0.359394	0.49642	0.409426	1.12898	0.0596567
Helq	ENSRNOG00000002181	0.924088	-1.20165	0.259506	-1.16164	0.242089	-0.0284715	0.977004	0.0115347	0.990754
2017-09-11	ENSRNOG00000002182	39.3689	0.649804	0.242272	-1.01829	0.0630851	0.334272	0.531548	-1.33383	0.0172151
Pgm2	ENSRNOG00000002185	16.1985	2.75931	0.0334441	-1.27924	0.265347	1.74236	0.187395	-2.29619	0.0590907
Nudt9	ENSRNOG00000002186	12.9882	-0.948298	0.208692	-0.723696	0.26225	0.494383	0.463639	0.718985	0.311713
LOC498368	ENSRNOG00000002191	2.70059	-0.685859	0.595075	-2.12653	0.0529751	3.36227	0.00993382	1.9216	0.124831
Rell1	ENSRNOG00000002192	2.55696	-0.295044	0.808903	2.33501	0.0455702	-0.927942	0.466921	1.70212	0.152352
Coq2	ENSRNOG00000002194	134.287	0.628386	0.266764	-0.538798	0.296107	0.724502	0.203929	-0.442682	0.405813
Ociad2	ENSRNOG00000002196	12.4555	-0.756762	0.378599	-1.09678	0.191204	-0.415841	0.601537	-0.755854	0.355581
Tmem165	ENSRNOG00000002199	17.7166	-0.641737	0.290119	-0.219559	0.686083	-0.0341945	0.951626	0.387983	0.496759
Lin54	ENSRNOG00000002203	2.85366	-0.143036	0.851468	-0.202983	0.776012	-0.158363	0.831669	-0.21831	0.763453
Ociad1	ENSRNOG00000002205	178.499	-0.128484	0.71246	0.170543	0.599979	-0.245229	0.480299	0.0537987	0.870576
Guf1	ENSRNOG00000002207	1.9645	-0.769369	0.498246	-0.802108	0.479589	-0.940168	0.375859	-0.972907	0.369537
Shroom3	ENSRNOG00000002208	0.882935	1.32412	0.150022	0.418089	0.630244	-0.145519	0.877141	-1.05155	0.225011
Hsd17b11	ENSRNOG00000002210	3.41961	-0.570553	0.552098	-1.80421	0.0649349	-0.570359	0.526799	-1.80402	0.0583953
Hsd17b13	ENSRNOG00000002212	2.6921	-1.84459	0.0992446	-0.109837	0.915586	-1.12002	0.286022	0.614732	0.550105
Klhl8	ENSRNOG00000002214	30.8832	0.931504	0.0207242	0.509423	0.143492	0.393995	0.319498	-0.0280867	0.936927
Srd5a3	ENSRNOG00000002216	5.16856	-0.261132	0.820358	-1.55422	0.143871	0.982284	0.359008	-0.3108	0.776278
Scarb2	ENSRNOG00000002225	7.9831	-0.267912	0.768685	-2.22088	0.0150568	0.991361	0.230896	-0.961607	0.275951
Kit	ENSRNOG00000002227	4.28587	-0.439404	0.617333	0.889988	0.250027	-0.0478774	0.95607	1.28151	0.133796
Adcy5	ENSRNOG00000002229	40.2684	-0.521655	0.741552	0.701143	0.583879	0.496032	0.744895	1.71883	0.255614
Aff1	ENSRNOG00000002232	1.25348	-0.0401119	0.961494	-0.447738	0.546177	0.694233	0.395602	0.286607	0.716237
Dirc2	ENSRNOG00000002240	546.635	-1.05912	0.1943	-2.31877	0.00526638	0.519583	0.447433	-0.740063	0.339804
Hspbap1	ENSRNOG00000002241	1.66428	-2.00036	0.09848	0.99915	0.345031	0.320189	0.788796	3.3197	0.00671322
Pdgfra	ENSRNOG00000002244	4.25799	-1.00905	0.0502242	0.0452079	0.92128	-0.741566	0.121192	0.312687	0.503428
Slc30a9	ENSRNOG00000002246	12.7337	0.579829	0.352797	-0.082586	0.879726	0.670605	0.288914	0.00818972	0.988812
Nup54	ENSRNOG00000002247	13.9899	-0.956506	0.286896	-0.775789	0.322127	0.462322	0.572733	0.64304	0.447238
Fryl	ENSRNOG00000002248	2.8168	-2.13335	0.026375	-0.692283	0.399267	-0.742022	0.338277	0.699044	0.420831
Sec31a	ENSRNOG00000002251	3.22653	-0.105441	0.908915	0.0977026	0.919721	-1.78945	0.0615408	-1.5863	0.080033
Wdr5b	ENSRNOG00000002253	0.891603	1.82113	0.215704	-0.2669	0.845702	0.485304	0.733783	-1.60273	0.249459
Tmem33	ENSRNOG00000002254	19.6133	-0.11342	0.745569	0.0166161	0.959003	-0.135532	0.693987	-0.00549561	0.986757
Fam162a	ENSRNOG00000002255	55.2636	0.716206	0.335654	-0.227702	0.75231	-0.348135	0.638839	-1.29204	0.075651
Art3	ENSRNOG00000002256	3.95139	0.649476	0.608959	0.462758	0.700393	-0.257156	0.841409	-0.443874	0.712048
Tmem150c	ENSRNOG00000002258	17.0481	0.0257855	0.956681	0.397016	0.34895	0.255845	0.591028	0.627076	0.173619
Enoph1	ENSRNOG00000002262	44.0343	0.0423491	0.926911	-0.0277106	0.946796	0.341831	0.459173	0.271771	0.536508
Chic2	ENSRNOG00000002267	6.41591	-0.407183	0.566107	-0.141685	0.832319	-0.46774	0.495094	-0.202243	0.763283
Hnrnpdl	ENSRNOG00000002270	15.9535	-0.870821	0.28283	0.386707	0.605931	-0.904555	0.24919	0.352973	0.642297
Slain2	ENSRNOG00000002271	3.74561	-0.463239	0.477185	0.29278	0.616957	-0.17065	0.7878	0.585369	0.345829
Lnx1	ENSRNOG00000002272	14.8713	0.472073	0.586581	-1.07483	0.213094	0.138065	0.867715	-1.40884	0.0981916
Naaa	ENSRNOG00000002273	1.8792	-0.631637	0.557328	0.508138	0.62932	-1.63955	0.131595	-0.499771	0.623932
Fip1l1	ENSRNOG00000002275	15.9624	-0.577492	0.32924	-0.0871857	0.863304	0.346013	0.53594	0.836319	0.142103
Phf6	ENSRNOG00000002276	2.76839	-0.834564	0.256493	0.379528	0.589787	-1.21553	0.0929505	-0.00143312	0.998333
Tec	ENSRNOG00000002278	74.1692	1.35413	0.330429	0.127457	0.924387	-0.153337	0.91433	-1.38001	0.296897
Sh3bgrl	ENSRNOG00000002280	6.04569	1.67154	0.241015	0.635224	0.613813	-1.67702	0.224588	-2.71333	0.0521037
Brwd3	ENSRNOG00000002291	0.859612	-0.0326898	0.978212	-0.114075	0.920642	-0.460377	0.69752	-0.541762	0.634346
Hnrpd	ENSRNOG00000002292	50.7985	0.0097955	0.982187	0.19198	0.651882	-0.678351	0.132923	-0.496167	0.241858
Snx29	ENSRNOG00000002294	0.896781	-1.45638	0.382978	1.23594	0.435968	-1.59008	0.343051	1.10224	0.484814
Uso1	ENSRNOG00000002301	34.2009	-0.304521	0.529507	0.353181	0.440722	-0.591078	0.226124	0.0666232	0.88413
Kcnj12	ENSRNOG00000002303	14.9216	0.430571	0.615043	-0.369377	0.612691	1.07872	0.211052	0.278773	0.729868
Slc15a2	ENSRNOG00000002305	5.68989	-0.5346	0.481566	0.640757	0.339616	-0.146378	0.844415	1.02898	0.160711
Limch1	ENSRNOG00000002318	13.5841	-0.713856	0.20145	1.1147	0.0325481	-0.542606	0.322702	1.28595	0.0210437
Tsn	ENSRNOG00000002319	151.778	0.363023	0.532979	-0.156128	0.745821	1.28933	0.0357764	0.770176	0.169223
Commd8	ENSRNOG00000002320	15.4194	0.0663627	0.906597	0.427229	0.453649	-1.19307	0.0467145	-0.832208	0.132038
RGD1566265	ENSRNOG00000002323	8.2774	-2.0856	0.0764331	0.495437	0.607793	-0.00421236	0.996865	2.57683	0.0242732
Gabrb1	ENSRNOG00000002327	93.1619	0.800929	0.132141	-0.316893	0.520478	0.216948	0.677817	-0.900874	0.0776697
Gabra4	ENSRNOG00000002336	47.7405	0.121916	0.690902	-0.295998	0.326288	-0.439829	0.154974	-0.857742	0.00746725
Dgke	ENSRNOG00000002338	22.642	0.633205	0.26792	0.0997879	0.845677	0.395871	0.493746	-0.137546	0.796566
Mark1	ENSRNOG00000002339	34.2073	0.0230295	0.963962	0.637972	0.178244	-0.158105	0.758344	0.456837	0.350092
LOC100361079	ENSRNOG00000002340	0.43759	-0.155955	0.85204	-1.58228	0.0625836	0.946761	0.277473	-0.479559	0.54732
Aldh3a2	ENSRNOG00000002342	10.818	-0.576684	0.432527	-0.863666	0.186706	0.623229	0.362672	0.336247	0.627814
Uchl1	ENSRNOG00000002343	1177.12	0.268132	0.291145	0.242361	0.293679	0.125279	0.621443	0.0995081	0.675556
Rasgef1b	ENSRNOG00000002345	5.06068	-0.139836	0.892902	2.06148	0.0502441	-1.58802	0.154521	0.613294	0.536105
Rgl1	ENSRNOG00000002347	31.9579	-0.095983	0.82849	-0.106656	0.787456	0.282631	0.518045	0.271959	0.519136
Gabra2	ENSRNOG00000002349	9.0279	-1.54229	0.235181	-0.718172	0.576492	-1.6373	0.159523	-0.813191	0.505919
Tsen15	ENSRNOG00000002352	15.9293	-0.644189	0.619897	1.10429	0.262157	0.958053	0.446246	2.70653	0.0349569
Rab3gap2	ENSRNOG00000002353	13.7641	0.364949	0.640267	-0.00844609	0.991189	-0.516619	0.508273	-0.890014	0.236855
Scpep1	ENSRNOG00000002358	45.0623	0.79232	0.645834	-0.197198	0.891317	1.34424	0.438127	0.354723	0.827008
Gabrg1	ENSRNOG00000002360	1.23312	0.0981384	0.946791	0.737672	0.588593	-2.05345	0.170415	-1.41391	0.317212
Prkg2	ENSRNOG00000002361	2.99038	-2.3383	0.0311724	0.904235	0.291967	-0.693354	0.454317	2.54918	0.0148544
Rnf112	ENSRNOG00000002364	46.8161	-0.435084	0.20828	0.499815	0.11887	-0.372768	0.272359	0.56213	0.0919808
Itm2a	ENSRNOG00000002365	31.871	0.298437	0.759214	-1.05594	0.273435	0.249549	0.789436	-1.10483	0.240074
Iars2	ENSRNOG00000002368	26.1947	1.1788	0.390207	-0.352473	0.78429	0.247242	0.859219	-1.28403	0.325533
Rgs8	ENSRNOG00000002369	11.7699	-0.88936	0.294323	0.945081	0.219248	-0.634179	0.442516	1.20026	0.14116
Akap1	ENSRNOG00000002373	13.6496	-0.421971	0.482422	0.507765	0.345668	-0.0753382	0.898256	0.854398	0.142182
Clasp1	ENSRNOG00000002376	7.83018	-0.896979	0.445849	2.04184	0.0959493	-2.62062	0.0396744	0.318199	0.773771
Bpnt1	ENSRNOG00000002378	37.0648	0.0918346	0.847287	-0.327461	0.458897	0.184036	0.69456	-0.235259	0.604104
Bmp3	ENSRNOG00000002381	24.0699	1.01419	0.143651	0.907584	0.142635	0.389522	0.588937	0.282915	0.659146
Prg4	ENSRNOG00000002385	1.25791	0.325227	0.784093	-0.267394	0.798065	1.60702	0.173126	1.0144	0.371543
Tceal1	ENSRNOG00000002387	16.8018	0.806765	0.160969	0.154593	0.780736	-0.506432	0.383033	-1.1586	0.0396467
Trim41	ENSRNOG00000002388	30.8976	-0.0215408	0.963242	0.265942	0.534384	-0.0280109	0.951962	0.259472	0.559969
Morf4l2	ENSRNOG00000002389	121.267	-0.142625	0.613785	0.251714	0.341376	-0.263349	0.351984	0.13099	0.625001
Eprs	ENSRNOG00000002393	26.5305	-0.201981	0.597526	-0.150973	0.668012	-0.0311467	0.93335	0.0198609	0.956193
Tpr	ENSRNOG00000002394	8.06593	-0.369498	0.537431	0.505179	0.384008	-0.987112	0.107133	-0.112435	0.842469
Slc30a10	ENSRNOG00000002397	2.70216	0.122043	0.876761	0.330041	0.654579	-0.365754	0.640562	-0.157756	0.83269
Gpc4	ENSRNOG00000002413	5.16288	-0.488954	0.581917	0.390551	0.634899	-0.523162	0.549554	0.356343	0.671778
Tgfb2	ENSRNOG00000002418	4.81633	1.22936	0.214679	2.1384	0.0290873	-0.681702	0.525643	0.22734	0.806151
Plp1	ENSRNOG00000002419	53.9692	0.216224	0.691391	-1.55861	0.00678468	0.465392	0.367196	-1.30944	0.0188614
Zc3h7a	ENSRNOG00000002420	8.88896	2.02516	0.0141325	0.324494	0.665268	-0.129215	0.87371	-1.82988	0.0188236
Fam114a2	ENSRNOG00000002423	4.06378	-0.634518	0.636722	0.850145	0.487685	-0.275711	0.83609	1.20895	0.346826
G3bp2	ENSRNOG00000002433	23.7996	-1.40958	0.169595	-0.823176	0.361054	-0.0626381	0.943988	0.523762	0.584301
Tmem100	ENSRNOG00000002434	0.909046	-0.410618	0.726974	-1.76419	0.119025	-0.15372	0.897598	-1.50729	0.186364
Mmd	ENSRNOG00000002436	142.105	0.0860874	0.722374	-0.159869	0.472058	0.228643	0.344394	-0.017314	0.939828
Ralb	ENSRNOG00000002440	13.0762	0.373587	0.574508	-0.301713	0.59979	0.952879	0.159317	0.277579	0.658582
Mfap3	ENSRNOG00000002443	21.6146	0.677756	0.161499	0.11875	0.775108	0.617787	0.209945	0.0587811	0.895252
Maged2	ENSRNOG00000002449	10.7494	-0.82147	0.386979	-0.322816	0.701305	0.0203924	0.981351	0.519047	0.562812
Rrp15	ENSRNOG00000002450	8.98224	-0.200726	0.869787	0.211653	0.862223	-1.2388	0.310748	-0.826416	0.479175
Txndc11	ENSRNOG00000002452	13.7836	0.0216032	0.985066	-0.846088	0.373818	1.46784	0.199312	0.600148	0.582263
Rnf2	ENSRNOG00000002454	7.69499	-0.743718	0.322197	0.363443	0.606708	-0.958214	0.191381	0.148947	0.83248
Hlf	ENSRNOG00000002456	56.8484	0.58958	0.59489	-0.585699	0.548281	0.762172	0.488166	-0.413107	0.693352
LOC100911746	ENSRNOG00000002462	1.66873	-0.634483	0.485224	0.929658	0.284569	-0.994724	0.276768	0.569417	0.508815
Tnr	ENSRNOG00000002468	15.3264	-0.935675	0.244746	-0.233125	0.747114	-0.251509	0.734186	0.451041	0.54975
RGD1307830	ENSRNOG00000002473	6.30408	0.0489563	0.974794	2.00272	0.155643	-0.244505	0.879403	1.70926	0.252868
Tom1l1	ENSRNOG00000002474	6.61875	0.154805	0.878685	0.115486	0.911514	-1.41678	0.169956	-1.4561	0.140412
Insig2	ENSRNOG00000002478	10.9885	-0.488751	0.676549	-0.261439	0.810787	-0.0376213	0.97313	0.189691	0.864351
Stxbp5l	ENSRNOG00000002496	7.20929	-2.26778	0.0656102	-1.238	0.296559	-1.65216	0.1003	-0.622384	0.584361
Cdkl2	ENSRNOG00000002506	40.4054	0.967173	0.0789983	-0.526265	0.290319	0.640397	0.237742	-0.85304	0.100565
Gnl3l	ENSRNOG00000002509	32.3276	0.0865084	0.800503	-0.189528	0.563617	-0.255566	0.453332	-0.531602	0.113402
Gpatch2	ENSRNOG00000002512	0.812344	-4.38055	0.000752597	0.075108	0.942217	-4.2766	0.00116151	0.179055	0.864678
Ccdc93	ENSRNOG00000002514	4.17022	-1.02569	0.361787	-1.36843	0.237875	-1.56738	0.130529	-1.91012	0.0828746
Mtm1	ENSRNOG00000002516	5.90007	-0.525089	0.581486	1.33915	0.157335	-1.39599	0.158867	0.468249	0.604153
Litaf	ENSRNOG00000002520	2.7583	-0.910738	0.615491	-2.59542	0.127036	0.400674	0.822576	-1.28401	0.456995
Gpr37	ENSRNOG00000002524	1.43618	0.356405	0.755916	0.479011	0.646294	0.364561	0.75268	0.487167	0.654463
Ptgs2	ENSRNOG00000002525	17.163	-0.216752	0.58988	-0.499423	0.201038	-0.244435	0.529132	-0.527106	0.176339
Rap2c	ENSRNOG00000002529	7.22897	0.290571	0.606864	-0.388227	0.487462	-0.471993	0.398135	-1.15079	0.0416002
C1galt1c1	ENSRNOG00000002536	15.4321	-0.157932	0.804422	-0.367291	0.564384	-0.745787	0.234573	-0.955146	0.125756
Wnk3	ENSRNOG00000002537	1.38327	-0.864144	0.574879	-0.369304	0.813407	-2.0243	0.18089	-1.52946	0.299413
Epb4.1l5	ENSRNOG00000002538	0.523911	-0.472872	0.713283	-0.251934	0.840848	0.867112	0.506182	1.08805	0.376834
Pds5a	ENSRNOG00000002541	3.44362	-1.52463	0.058931	-1.56823	0.0372152	0.0359759	0.956689	-0.00761531	0.991752
Kifap3	ENSRNOG00000002544	113.156	0.153256	0.582116	0.0735126	0.769395	0.262828	0.348077	0.183084	0.488938
RGD1309748	ENSRNOG00000002545	19.3586	-0.089167	0.833075	-0.26228	0.517456	-0.340113	0.413731	-0.513226	0.210541
Rchy1	ENSRNOG00000002546	24.62	-1.19104	0.0753963	0.128705	0.826367	-0.637701	0.296409	0.682049	0.270987
Smim14	ENSRNOG00000002553	56.511	-0.112535	0.859747	-0.558049	0.366539	-0.279014	0.649595	-0.724528	0.239411
Tsr2	ENSRNOG00000002556	34.0449	0.380122	0.302122	0.276159	0.397081	0.45638	0.225393	0.352418	0.312238
Mcts1	ENSRNOG00000002563	21.6963	-0.640382	0.312209	0.0417282	0.944973	-0.88129	0.153336	-0.19918	0.737462
Taf1	ENSRNOG00000002565	6.57825	-1.93904	0.121845	-0.460161	0.661481	-0.328546	0.754671	1.15033	0.32683
Mrps14	ENSRNOG00000002569	32.6033	-0.555932	0.469706	0.691757	0.320794	-0.379217	0.615275	0.868472	0.238897
Tekt5	ENSRNOG00000002571	0.899527	2.95187	0.0267367	-1.3149	0.281727	1.75167	0.16916	-2.5151	0.0440229
Cacybp	ENSRNOG00000002572	100.051	-0.334685	0.588013	-0.448253	0.45817	-0.627445	0.296715	-0.741013	0.214075
Nubp1	ENSRNOG00000002574	10.5096	-0.894619	0.230548	-0.490144	0.413894	0.917436	0.181092	1.32191	0.0675285
Sap30l	ENSRNOG00000002575	7.98128	0.180777	0.847748	-0.520614	0.560541	0.0127749	0.988997	-0.688616	0.444214
Parm1	ENSRNOG00000002579	26.423	-0.278385	0.543313	-0.783496	0.0788813	0.0729228	0.866298	-0.432188	0.324493
Trmt1l	ENSRNOG00000002580	28.695	0.172518	0.788121	-0.524587	0.337535	1.27089	0.0542286	0.573781	0.348933
Cul4b	ENSRNOG00000002585	3.80192	1.12909	0.129418	-0.201922	0.775888	-0.142656	0.847206	-1.47367	0.0419445
Rps6ka6	ENSRNOG00000002592	0.683433	-1.1813	0.408053	0.572787	0.672496	-1.20553	0.393463	0.548559	0.683421
Esrrg	ENSRNOG00000002593	3.51344	0.107949	0.88674	-0.538679	0.460732	-0.181231	0.805208	-0.827859	0.257928
Dpp10	ENSRNOG00000002595	23.2605	-0.66323	0.285866	-0.319914	0.575739	-0.297905	0.608892	0.0454115	0.937735
Sox9	ENSRNOG00000002607	2.22461	-0.879442	0.364817	-0.257182	0.784941	-1.15177	0.213706	-0.529508	0.563047
Ero1lb	ENSRNOG00000002609	2.71586	-0.281782	0.753021	0.0132555	0.988965	-2.44951	0.0106075	-2.15448	0.0177966
Carhsp1	ENSRNOG00000002610	3.48068	-1.95337	0.218532	-1.24672	0.355635	0.996559	0.480325	1.70321	0.257148
Ddx52	ENSRNOG00000002612	6.40588	1.5027	0.279882	-2.58661	0.058197	1.83344	0.177414	-2.25588	0.0946673
Pmm2	ENSRNOG00000002615	7.32309	-0.189136	0.846035	0.112315	0.898291	0.117527	0.90209	0.418978	0.650707
Ivns1abp	ENSRNOG00000002618	17.2584	-0.206584	0.577433	-0.35069	0.311661	0.00634469	0.985829	-0.137761	0.694815
Ptpn4	ENSRNOG00000002625	7.15425	-0.282972	0.581633	-0.621016	0.214739	-0.242165	0.621118	-0.580209	0.241035
Car10	ENSRNOG00000002626	26.1448	-0.239136	0.737408	-0.332901	0.653041	-1.44949	0.0443589	-1.54325	0.0314975
Kctd3	ENSRNOG00000002627	6.71022	-0.830806	0.157752	-0.798224	0.121675	0.514194	0.335084	0.546777	0.320667
Cnot8	ENSRNOG00000002630	96.081	-0.505839	0.303515	-0.233197	0.585993	0.33893	0.468201	0.611572	0.193036
Naca	ENSRNOG00000002632	60.7364	-0.159833	0.728185	0.285687	0.513611	-0.547836	0.237663	-0.102316	0.814434
Dexi	ENSRNOG00000002635	11.1377	-0.154872	0.866848	-0.108677	0.895382	0.297201	0.742497	0.343396	0.695312
Abat	ENSRNOG00000002636	23.3496	1.82905	0.242074	0.156409	0.894402	2.24583	0.180886	0.57319	0.691384
Ptges3	ENSRNOG00000002642	124.146	0.291094	0.365435	0.0852066	0.773907	-0.0140873	0.9649	-0.219975	0.469118
Ugdh	ENSRNOG00000002643	28.6395	-0.0880451	0.903806	0.0969449	0.888117	-0.342796	0.636478	-0.157806	0.819484
Utp18	ENSRNOG00000002644	9.04044	0.330768	0.642809	0.0254577	0.970921	-0.629685	0.378573	-0.934995	0.176186
Gemin5	ENSRNOG00000002645	2.2332	-0.979219	0.187017	-0.0600067	0.924409	0.134857	0.842004	1.05407	0.136737
Rap1gap2	ENSRNOG00000002652	81.882	1.08588	0.0277375	0.157211	0.708316	0.55731	0.252204	-0.371364	0.400809
Kcnk2	ENSRNOG00000002653	22.6145	-0.852353	0.49666	-1.35257	0.243183	0.44257	0.696072	-0.0576475	0.961266
Magee1	ENSRNOG00000002660	21.6262	-0.00680089	0.991801	0.170117	0.784745	-0.361538	0.582048	-0.184621	0.768978
Pbdc1	ENSRNOG00000002662	18.9469	-0.731994	0.180837	0.0974183	0.846243	-0.63548	0.225169	0.193932	0.702549
Lamc2	ENSRNOG00000002667	4.32928	-2.11962	0.188577	-0.987499	0.460194	0.144248	0.913411	1.27637	0.401055
Cluh	ENSRNOG00000002669	9.27963	-0.614858	0.535251	-0.789243	0.313747	1.49126	0.116019	1.31688	0.166147
Nme2	ENSRNOG00000002671	159.314	0.00759715	0.988149	0.0818264	0.861712	0.00969661	0.984755	0.0839258	0.862673
Lamc1	ENSRNOG00000002680	3.99485	-1.61295	0.0329246	-0.402731	0.527316	-0.436561	0.497991	0.773662	0.260818
Zfp692	ENSRNOG00000002682	2.60674	0.453189	0.583208	-0.750449	0.333121	0.489191	0.546252	-0.714447	0.365261
Nme1	ENSRNOG00000002693	329.463	-0.449891	0.355884	-0.360719	0.413065	0.163901	0.723756	0.253072	0.581263
Tfb2m	ENSRNOG00000002695	12.4267	-0.0240033	0.97033	-0.170918	0.782282	-0.332886	0.599348	-0.479801	0.437061
Mtmr1	ENSRNOG00000002697	48.5159	0.823316	0.121577	-0.531307	0.247608	1.1918	0.031446	-0.162821	0.738573
Vps4b	ENSRNOG00000002705	31.0146	0.28987	0.561567	-0.509944	0.255825	0.777432	0.12186	-0.0223828	0.962083
Phf8	ENSRNOG00000002708	1.68476	-0.187455	0.815264	-1.50676	0.0624667	0.238598	0.747419	-1.08071	0.167558
Cnst	ENSRNOG00000002710	0.791467	0.399736	0.793495	0.938575	0.520471	-0.326041	0.828659	0.212797	0.883154
Zfp672	ENSRNOG00000002713	9.59177	0.507463	0.583038	0.0455972	0.958826	-0.180978	0.847028	-0.642844	0.465014
Mettl22	ENSRNOG00000002714	33.1147	0.57179	0.660111	-0.507519	0.661707	0.864319	0.511719	-0.21499	0.861135
LOC688963	ENSRNOG00000002721	39.5542	0.068308	0.930215	-0.0709242	0.920299	0.124539	0.871184	-0.0146935	0.984146
Sec14l1	ENSRNOG00000002722	28.1673	0.312789	0.638719	0.0390662	0.948429	0.256008	0.701974	-0.0177148	0.977557
Prpsap2	ENSRNOG00000002724	45.9463	-0.192617	0.72022	0.863005	0.0886423	-0.244645	0.653382	0.810977	0.122934
Rgs5	ENSRNOG00000002730	2.23248	-2.1675	0.180934	0.729685	0.62899	-1.70612	0.295643	1.19106	0.431106
AABR07042077.1	ENSRNOG00000002734	5.70234	-0.551926	0.620853	0.163456	0.880499	-1.10908	0.309186	-0.393699	0.709598
Dhx9	ENSRNOG00000002735	7.41595	-0.992526	0.28706	0.678823	0.434318	-0.993014	0.273845	0.678336	0.439942
Rabgap1l	ENSRNOG00000002736	1.83242	0.532478	0.731964	-0.108667	0.945247	-2.25192	0.165782	-2.89306	0.0605684
Fstl1	ENSRNOG00000002746	7.35172	-0.46017	0.738247	-0.754999	0.493191	1.55558	0.239126	1.26075	0.335475
Ccdc43	ENSRNOG00000002748	6.58789	-0.0846773	0.913292	0.504326	0.498194	-0.632549	0.418645	-0.0435462	0.952927
Spag9	ENSRNOG00000002749	17.7012	-0.621332	0.228099	-0.0692002	0.889255	-1.12099	0.0295309	-0.568854	0.244372
Rc3h1	ENSRNOG00000002750	0.799494	-1.05556	0.399813	-1.9689	0.0993765	0.00265263	0.998171	-0.910687	0.444159
Adam11	ENSRNOG00000002753	0.762924	1.73005	0.114973	-0.548194	0.591741	0.642741	0.548212	-1.6355	0.116154
Pafah1b1	ENSRNOG00000002755	38.1696	-0.480358	0.335332	0.0994217	0.834967	-0.972893	0.0528584	-0.393114	0.404572
Tada2a	ENSRNOG00000002757	25.8329	-0.546612	0.459656	-0.823652	0.210062	0.725093	0.289905	0.448053	0.522519
Lias	ENSRNOG00000002759	18.0923	-0.999497	0.246101	0.2974	0.698275	-0.525171	0.518705	0.771726	0.342298
Ulk2	ENSRNOG00000002763	17.9515	0.0380983	0.932928	-0.128293	0.774727	-0.827385	0.0745649	-0.993777	0.0299823
Mettl16	ENSRNOG00000002764	3.34221	-0.656712	0.441267	0.0975217	0.901133	-0.390807	0.633928	0.363427	0.651696
Dlg3	ENSRNOG00000002767	33.1961	0.353091	0.325838	-0.233721	0.476224	0.34005	0.342301	-0.246762	0.466366
Tmem114	ENSRNOG00000002768	0.422825	-1.3001	0.273391	-1.11296	0.344457	1.32041	0.280217	1.50755	0.183776
Rgs4	ENSRNOG00000002773	317.422	0.0783293	0.761315	-0.332895	0.17577	0.0515211	0.838027	-0.359703	0.152287
Aatf	ENSRNOG00000002778	10.4665	-1.23902	0.0938693	0.0405314	0.947732	-0.170803	0.795148	1.10875	0.112608
Kdsr	ENSRNOG00000002781	19.2786	-0.508215	0.416645	0.249257	0.665436	-0.43096	0.480474	0.326511	0.580463
Epgn	ENSRNOG00000002782	1.56831	-0.798262	0.576091	1.03893	0.446775	0.389311	0.787552	2.2265	0.110874
Abcb7	ENSRNOG00000002790	1.04414	-2.00226	0.219656	0.182294	0.904767	-1.69592	0.30059	0.488635	0.747592
Bcl2	ENSRNOG00000002791	1.18514	-3.6388	0.00403735	-0.774041	0.471625	-2.54397	0.0410849	0.320784	0.764734
Sstr2	ENSRNOG00000002793	14.1161	2.35272	0.0489523	0.108106	0.908815	1.81119	0.153071	-0.433421	0.68708
Cog1	ENSRNOG00000002795	12.6792	0.0283752	0.974308	-2.08448	0.0144942	1.57366	0.061852	-0.539196	0.522242
Gfpt2	ENSRNOG00000002810	1.52608	2.47628	0.181925	-1.2784	0.464785	1.96787	0.278805	-1.7868	0.305156
Brinp3	ENSRNOG00000002811	4.38779	0.285222	0.804469	1.35384	0.238649	-1.34097	0.271028	-0.272348	0.803314
Dars2	ENSRNOG00000002813	6.3161	-0.989409	0.39752	-0.922882	0.343911	1.01872	0.339993	1.08525	0.328423
Eftud2	ENSRNOG00000002818	36.3905	-0.365042	0.433988	-0.326036	0.430225	0.380414	0.39692	0.419419	0.344662
LOC24906	ENSRNOG00000002820	2.74548	0.183542	0.80189	0.0785874	0.90733	0.0649838	0.928732	-0.0399712	0.95402
Phlpp1	ENSRNOG00000002821	16.9448	0.136201	0.740917	-0.511792	0.196478	0.0910068	0.821746	-0.556986	0.164504
Mapk9	ENSRNOG00000002823	41.9353	-0.439346	0.490174	-0.200081	0.731595	-0.145904	0.810491	0.0933606	0.876473
Hsd17b7	ENSRNOG00000002826	1.95743	-0.270007	0.825075	-0.180704	0.873381	-0.273844	0.816054	-0.18454	0.873513
Rbfox1	ENSRNOG00000002827	98.2544	0.0655777	0.795059	-0.309631	0.206972	-0.221283	0.375789	-0.596492	0.0206466
Tob1	ENSRNOG00000002828	5.5122	0.765193	0.244932	-0.0436742	0.943405	0.032454	0.960814	-0.776413	0.21493
Slc16a2	ENSRNOG00000002832	4.05002	-0.49678	0.733042	1.99971	0.166909	-2.04293	0.178922	0.453564	0.742691
Gsk3b	ENSRNOG00000002833	9.78461	0.16073	0.849254	-0.0162537	0.984426	-0.735794	0.384929	-0.912778	0.262773
Luc7l3	ENSRNOG00000002835	28.1911	-0.406992	0.316856	-0.342689	0.375847	-0.390857	0.316575	-0.326554	0.395854
Pdzd11	ENSRNOG00000002838	16.6239	-0.405283	0.455195	-1.155	0.0284737	0.457192	0.362624	-0.292529	0.569776
Slc19a2	ENSRNOG00000002839	14.9654	-0.355769	0.578846	-1.43223	0.0407056	-0.800326	0.177317	-1.87679	0.00541522
Atp5b	ENSRNOG00000002840	379.549	-0.208996	0.384489	0.0907771	0.671925	0.0894658	0.702431	0.389239	0.096384
Cdc42bpa	ENSRNOG00000002841	5.73099	-0.753547	0.24673	-1.52085	0.0282351	-0.804961	0.16521	-1.57227	0.017008
Cxcl6	ENSRNOG00000002843	2.90215	-0.195862	0.786998	0.328768	0.612675	0.193937	0.787375	0.718566	0.301869
Usp27x	ENSRNOG00000002844	2.10428	0.0289893	0.983519	0.0787304	0.952714	-0.28782	0.836655	-0.238079	0.858138
Maoa	ENSRNOG00000002848	15.8988	0.721475	0.268127	-1.24469	0.0442279	1.03367	0.108567	-0.932499	0.136593
Fam104a	ENSRNOG00000002851	40.0136	-0.552289	0.26095	-0.694219	0.117141	0.403682	0.378338	0.261751	0.569541
Myo19	ENSRNOG00000002852	3.32262	-0.473404	0.763814	2.36675	0.125064	-1.43041	0.389548	1.40975	0.351236
Rfc1	ENSRNOG00000002855	8.16075	-0.48694	0.348374	-0.472833	0.304189	0.376246	0.442434	0.390353	0.426334
Ccdc181	ENSRNOG00000002860	13.1171	-0.662912	0.285229	-0.502025	0.382952	-0.206342	0.719631	-0.0454549	0.937597
Clcn5	ENSRNOG00000002862	0.39229	-1.51828	0.218145	2.71919	0.0316615	-0.954564	0.428556	3.28291	0.00910344
Cacna1e	ENSRNOG00000002863	11.3603	-0.215841	0.791505	0.125208	0.877828	-1.12851	0.171211	-0.787462	0.314918
Nacc1	ENSRNOG00000002864	18.4274	-0.677726	0.496233	0.117787	0.885368	0.634784	0.502344	1.4303	0.137104
Rassf6	ENSRNOG00000002866	2.02588	0.490866	0.486253	-0.577312	0.369549	0.726424	0.302616	-0.341754	0.608015
Rbm25l1	ENSRNOG00000002871	6.2256	0.334926	0.67923	0.457672	0.554491	-0.468098	0.57384	-0.345352	0.653355
Fam183b	ENSRNOG00000002873	4.56284	0.0637608	0.965898	1.70598	0.229964	-1.68692	0.257427	-0.0446959	0.9748
Rbm25	ENSRNOG00000002874	2.35955	-0.157676	0.88618	0.085158	0.934828	-0.30672	0.779342	-0.0638854	0.951244
Klhl20	ENSRNOG00000002875	24.4691	1.191	0.189056	0.494302	0.561814	-0.250346	0.78774	-0.947042	0.268304
Psen2	ENSRNOG00000002879	29.359	-0.477962	0.589939	0.145491	0.847312	0.407903	0.634532	1.03136	0.22599
Alg1	ENSRNOG00000002883	3.32386	-1.02592	0.488014	-1.60746	0.216207	1.66734	0.232998	1.0858	0.439452
Blzf1	ENSRNOG00000002884	5.61646	-2.01501	0.0148	0.103739	0.872833	-0.486476	0.477903	1.63227	0.0339179
Myh10	ENSRNOG00000002886	52.2491	-0.29192	0.305598	0.246502	0.363646	-0.708111	0.0181684	-0.169689	0.526563
Prdx6	ENSRNOG00000002896	36.6188	0.494214	0.346004	-0.217075	0.644394	0.544596	0.302904	-0.166694	0.734701
Nme7	ENSRNOG00000002898	13.7045	-1.32915	0.142491	-0.302885	0.714548	-0.872153	0.283831	0.154114	0.854262
Akap10	ENSRNOG00000002899	9.66086	-1.21188	0.313175	-0.525797	0.612366	0.0440607	0.966648	0.730148	0.519987
Specc1	ENSRNOG00000002903	15.433	0.560408	0.686619	-0.489965	0.733341	-0.908757	0.508233	-1.95913	0.146038
Arr3	ENSRNOG00000002904	1.04226	-1.71128	0.283252	-0.0189813	0.989899	-0.901748	0.575315	0.790553	0.597061
Plekha6	ENSRNOG00000002907	14.6951	0.42105	0.674519	-0.598963	0.523202	0.117409	0.903896	-0.902605	0.347416
Slc35a4	ENSRNOG00000002908	6.09497	-0.54921	0.612973	0.752567	0.443818	-0.361092	0.738339	0.940685	0.364281
Alb	ENSRNOG00000002911	4.02618	0.755659	0.725629	1.93063	0.342704	-0.609967	0.778211	0.565001	0.781944
Parn	ENSRNOG00000002912	3.98618	-1.27572	0.157588	0.341224	0.669543	-0.67436	0.420705	0.942587	0.266441
Trmt1	ENSRNOG00000002914	8.58096	-1.5045	0.200581	1.3573	0.147307	0.148756	0.890992	3.01056	0.0108576
Trim11	ENSRNOG00000002915	2.81975	0.491669	0.747616	1.45514	0.312759	-0.431543	0.783333	0.531928	0.713837
Car4	ENSRNOG00000002916	32.0401	0.328934	0.759939	-1.28341	0.248849	-0.289429	0.774852	-1.90178	0.0740942
Gfap	ENSRNOG00000002919	10.0878	0.694288	0.441947	0.783374	0.353437	-0.187918	0.841788	-0.0988313	0.907548
Uap1	ENSRNOG00000002926	12.1817	-1.87507	0.0370197	-0.924588	0.243419	-0.525417	0.469799	0.425068	0.602274
Guk1	ENSRNOG00000002928	197.532	0.429781	0.373334	-0.143322	0.749234	0.0517255	0.914076	-0.521378	0.258081
Wdr19	ENSRNOG00000002932	2.09159	-0.261997	0.861773	2.04155	0.190223	-2.58203	0.108946	-0.278487	0.845122
Atp1b1	ENSRNOG00000002934	400.826	-0.0694185	0.730108	0.00333589	0.98586	-0.246964	0.222217	-0.174209	0.366016
Ankrd40	ENSRNOG00000002935	30.7822	0.142704	0.744704	-0.476907	0.259773	-0.025544	0.95254	-0.645154	0.131975
Ankrd17	ENSRNOG00000002940	18.1789	-0.580746	0.199887	-0.0157506	0.970501	-0.823649	0.0652826	-0.258654	0.540621
Uhmk1	ENSRNOG00000002941	13.992	-1.87177	0.0412791	-1.88105	0.0412483	-1.09275	0.135074	-1.10203	0.196936
Mrpl55	ENSRNOG00000002943	22.592	1.17197	0.219818	-1.97962	0.019931	2.62909	0.00858269	-0.522499	0.556132
RGD1304587	ENSRNOG00000002944	17.5233	1.85022	0.134212	-1.13984	0.301515	1.58284	0.209368	-1.40722	0.224818
Pgs1	ENSRNOG00000002949	35.3271	-0.430262	0.542546	-1.32776	0.048232	0.701525	0.288123	-0.195977	0.76962
Stim2	ENSRNOG00000002956	13.0711	-0.278608	0.65475	-0.0120654	0.983033	-0.0476853	0.937711	0.218858	0.710823
LOC100909913	ENSRNOG00000002960	3.47456	-1.69239	0.179597	0.455928	0.691265	-0.952807	0.41852	1.19551	0.313111
Zswim7	ENSRNOG00000002970	11.5216	-0.943619	0.638391	-1.07513	0.579458	-1.67112	0.398994	-1.80263	0.348331
Maats1	ENSRNOG00000002976	0.72324	0.0262451	0.986016	-0.411288	0.773682	0.187985	0.90027	-0.249548	0.860607
Ttc19	ENSRNOG00000002977	21.5735	-0.00193301	0.997768	0.184698	0.797025	-1.65333	0.0247905	-1.4667	0.0346037
Tsr1	ENSRNOG00000002980	3.59643	-1.10044	0.181998	-1.18202	0.118997	0.157387	0.827458	0.0758078	0.921323
Nfix	ENSRNOG00000002983	16.9952	1.25381	0.249114	0.0389813	0.968526	0.487715	0.662254	-0.727115	0.476514
Nmt1	ENSRNOG00000002989	38.2899	0.148345	0.808763	-0.648077	0.258902	0.4378	0.466596	-0.358621	0.53915
Srr	ENSRNOG00000002991	9.23428	-1.23649	0.0920187	0.62732	0.354946	-1.30269	0.0654031	0.56112	0.407008
Slc9a3r2	ENSRNOG00000002997	2.61831	2.05072	0.0635922	-1.3568	0.179061	1.89064	0.0881865	-1.51687	0.140988
Timmdc1	ENSRNOG00000002999	19.4139	-0.69306	0.515455	-1.34699	0.176854	0.535045	0.583989	-0.118882	0.906171
Tbc1d19	ENSRNOG00000003003	6.03078	-0.429003	0.690485	-0.448571	0.665927	-0.520361	0.612595	-0.53993	0.598314
Rasgef1c	ENSRNOG00000003005	34.2598	-1.05394	0.19725	-0.592655	0.410254	0.167731	0.819996	0.629018	0.411786
Gadd45gip1	ENSRNOG00000003011	8.12339	0.122097	0.889511	0.121255	0.879586	0.269164	0.76042	0.268322	0.747704
Rpgr	ENSRNOG00000003013	1.25352	-1.59771	0.0909268	-0.185213	0.82894	-0.839389	0.335799	0.573107	0.5094
Poglut1	ENSRNOG00000003014	9.97622	-0.45741	0.588117	0.69316	0.351173	-0.129768	0.875722	1.0208	0.209411
Olfml2b	ENSRNOG00000003018	4.72316	-0.123108	0.912084	-2.33325	0.0481145	0.0556414	0.955577	-2.1545	0.0538903
Ubn1	ENSRNOG00000003019	9.52538	2.05025	0.0424544	0.960318	0.305924	-0.16922	0.872447	-1.25915	0.177567
Nap1l2	ENSRNOG00000003025	14.5302	0.841374	0.297041	-0.668722	0.371344	0.487197	0.5408	-1.0229	0.185357
Rad23a	ENSRNOG00000003026	8.83732	0.461301	0.565127	0.513009	0.474553	0.241811	0.767144	0.293518	0.698587
Calr	ENSRNOG00000003029	81.8613	-0.193674	0.57882	0.431513	0.176995	-0.00998605	0.976951	0.615201	0.0736668
Atp2b4	ENSRNOG00000003031	133.536	1.54339	0.0245212	-0.151878	0.806527	0.23147	0.730516	-1.4638	0.0246944
Plcd3	ENSRNOG00000003033	3.36494	1.33904	0.24151	0.219047	0.828632	0.939991	0.425314	-0.180005	0.865775
Sft2d2	ENSRNOG00000003038	1.70611	-1.7042	0.251923	1.46442	0.256088	-0.436154	0.763706	2.73247	0.0596481
Smg6	ENSRNOG00000003041	3.68426	0.287863	0.593692	-0.414043	0.395064	0.607552	0.260113	-0.0943533	0.853096
Mettl13	ENSRNOG00000003042	9.15285	-1.02279	0.230325	-0.303912	0.653359	0.79495	0.305558	1.51383	0.0668194
Tiprl	ENSRNOG00000003048	40.9519	-0.445163	0.303604	0.297434	0.462808	-0.667501	0.12112	0.0750959	0.852888
Tbc1d9b	ENSRNOG00000003050	41.8983	0.28918	0.756388	1.37248	0.102415	0.172019	0.858952	1.25532	0.165375
Cox18	ENSRNOG00000003052	18.8614	-0.918717	0.280689	-2.32868	0.00658444	0.764066	0.295679	-0.645899	0.425596
LOC679960	ENSRNOG00000003062	43.4557	0.594619	0.172076	-0.708492	0.0883419	0.404415	0.34019	-0.898696	0.0357368
Phka1	ENSRNOG00000003063	1.66872	-0.547828	0.512696	0.0579089	0.943112	-0.92507	0.258915	-0.319333	0.686499
Bst1	ENSRNOG00000003064	0.588728	-2.0913	0.0377429	0.300408	0.721236	-3.73869	0.000966547	-1.34698	0.145288
Glyr1	ENSRNOG00000003065	26.3899	-0.360999	0.395305	-0.343971	0.384615	-0.146416	0.717687	-0.129388	0.746219
RGD1564036	ENSRNOG00000003068	1.89864	-2.27587	0.127267	0.315166	0.819785	-1.65367	0.268384	0.937359	0.497097
Pigl	ENSRNOG00000003070	2.84034	-1.76911	0.136733	1.10746	0.32014	-1.63895	0.154731	1.23762	0.266293
Vamp4	ENSRNOG00000003071	66.1266	1.09991	0.21244	-0.296023	0.732613	-0.420478	0.628113	-1.81641	0.0365678
Tmem39a	ENSRNOG00000003075	3.67694	-0.381903	0.75407	-0.611119	0.569853	0.784936	0.500599	0.55572	0.631109
Rbms2	ENSRNOG00000003076	4.9515	-0.246082	0.858354	0.411483	0.74371	0.0675845	0.960806	0.725149	0.580486
Dcaf6	ENSRNOG00000003078	33.2683	-0.157248	0.823779	0.159647	0.808933	-0.307445	0.658886	0.00945048	0.988737
Parp1	ENSRNOG00000003084	35.7532	-0.39954	0.312293	0.208417	0.568876	-0.413703	0.285309	0.194253	0.600956
Cenpv	ENSRNOG00000003086	35.0283	-0.274767	0.76224	1.14801	0.18872	-0.911913	0.332703	0.510861	0.554732
Prom1	ENSRNOG00000003098	1.7028	-0.674222	0.703923	0.0422583	0.978409	0.839498	0.630002	1.55598	0.358846
Ubqln2	ENSRNOG00000003099	19.0766	-0.0983779	0.858028	0.283722	0.587993	-0.490489	0.375008	-0.108389	0.835451
Dusp12	ENSRNOG00000003100	4.15109	-1.37272	0.284826	-2.35138	0.0630036	-1.03636	0.384504	-2.01502	0.105697
Trpv2	ENSRNOG00000003104	18.6094	-1.3225	0.0697298	0.0834065	0.885244	0.119362	0.851493	1.52527	0.0301394
Acbd4	ENSRNOG00000003108	10.5159	-2.45076	0.067204	0.392132	0.716687	-0.542918	0.635064	2.29998	0.0701689
Ovca2	ENSRNOG00000003111	7.93479	-0.206491	0.799772	0.24116	0.727789	0.557639	0.484527	1.00529	0.200741
B4galt4	ENSRNOG00000003114	7.76787	-1.23871	0.354398	0.275075	0.823506	-0.662945	0.598537	0.850842	0.50074
Psmd12	ENSRNOG00000003117	62.172	0.0190843	0.971795	-0.737567	0.143519	0.534303	0.313322	-0.222348	0.66483
Prelp	ENSRNOG00000003120	0.71347	-2.05853	0.22489	-3.01414	0.0618128	-0.229164	0.893338	-1.18477	0.456026
Rtn4rl1	ENSRNOG00000003121	17.3977	-0.202111	0.788983	0.060078	0.924052	0.785821	0.290299	1.04801	0.152196
Hdac8	ENSRNOG00000003122	1.61371	0.175512	0.831835	-0.549519	0.479273	0.228153	0.778883	-0.496878	0.528283
Rpa1	ENSRNOG00000003123	7.70106	-0.696096	0.279454	0.148292	0.800701	-0.560764	0.363404	0.283624	0.638141
Rogdi	ENSRNOG00000003125	105.557	-0.294008	0.800625	-0.25584	0.756165	2.13435	0.0628116	2.17252	0.0552562
Spryd4	ENSRNOG00000003127	4.08304	0.98314	0.244552	-2.13354	0.0142988	0.806751	0.323286	-2.30993	0.00782538
Zfp496	ENSRNOG00000003129	0.897575	-0.823292	0.576586	-1.16824	0.412872	-1.59976	0.278439	-1.9447	0.173374
Traf7	ENSRNOG00000003131	7.36895	-0.263951	0.758231	1.06588	0.193075	-0.531017	0.543977	0.798813	0.331724
Mip	ENSRNOG00000003132	4.66507	0.259158	0.722604	0.646609	0.339903	-0.114762	0.877195	0.272688	0.693831
Slc4a4	ENSRNOG00000003134	4.65732	-0.834243	0.382848	-1.03582	0.210708	0.858809	0.327426	0.657236	0.467113
Fcrla	ENSRNOG00000003136	2.12882	0.369239	0.684149	-0.183328	0.83038	-0.0586835	0.948178	-0.611251	0.47977
Smc1a	ENSRNOG00000003139	40.9481	1.38771	0.15759	0.87946	0.284118	0.982571	0.34152	0.474323	0.601481
Sqstm1	ENSRNOG00000003147	650.216	0.0681167	0.792618	-0.339903	0.145661	0.628336	0.0209358	0.220316	0.373698
Timp2	ENSRNOG00000003148	148.917	-2.01991	0.0100146	0.814409	0.210779	-1.15307	0.0940391	1.68125	0.0214446
Farsa	ENSRNOG00000003149	86.5804	1.49127	0.026965	-0.730784	0.208607	1.30121	0.0570123	-0.920845	0.134996
Mpc2	ENSRNOG00000003150	450.026	-1.72965	0.0723481	-0.318495	0.702093	-0.549133	0.514346	0.862025	0.331652
Bfar	ENSRNOG00000003151	6.45005	-0.189596	0.784441	-0.748646	0.216696	0.941122	0.163389	0.382073	0.561557
Gm8444	ENSRNOG00000003158	2.65288	0.597788	0.573042	-0.312416	0.749832	-0.761871	0.472147	-1.67208	0.107163
Sdhc	ENSRNOG00000003163	105.181	-0.270019	0.570939	-0.0974995	0.809397	0.729548	0.123425	0.902067	0.0556924
Serpinf1	ENSRNOG00000003172	0.429975	1.26779	0.26474	0.300408	0.763021	-1.84466	0.103493	-2.81204	0.0145027
Tapt1	ENSRNOG00000003174	27.5197	0.687529	0.134169	-0.635979	0.139913	0.40573	0.364177	-0.917778	0.0402661
Mixl1	ENSRNOG00000003176	1.12078	0.920725	0.269554	-0.729484	0.337054	1.3606	0.102164	-0.289608	0.710192
Mat2b	ENSRNOG00000003177	49.9435	0.190376	0.568748	-0.419052	0.19846	-0.132683	0.685896	-0.742111	0.0278091
Mageh1	ENSRNOG00000003178	16.6243	0.563363	0.301624	0.201181	0.684565	0.168178	0.760087	-0.194004	0.704149
Acbd3	ENSRNOG00000003185	9.15831	-0.675742	0.284686	-0.132816	0.81708	-0.422005	0.479802	0.120921	0.837829
Anks3	ENSRNOG00000003186	12.0752	-0.475328	0.623714	0.793731	0.378192	-0.552023	0.566701	0.717036	0.437447
Armcx5	ENSRNOG00000003187	14.7556	0.623335	0.346675	0.938146	0.163468	-1.19725	0.0918695	-0.882435	0.166028
Bhlhb9	ENSRNOG00000003191	6.90052	0.0735127	0.911325	-0.430957	0.51049	-0.544972	0.400315	-1.04944	0.105701
Caskin1	ENSRNOG00000003195	8.43323	-1.34021	0.0600642	0.242615	0.707317	-1.16672	0.0787443	0.416104	0.521558
RGD1305733	ENSRNOG00000003198	115.261	-0.52107	0.210009	-0.341981	0.389619	-0.654736	0.103725	-0.475647	0.227488
LOC100362640	ENSRNOG00000003201	186.83	0.381948	0.451612	-0.23538	0.633497	-0.35276	0.484917	-0.970088	0.0535661
Hexim1	ENSRNOG00000003203	41.2339	-1.32399	0.0794627	-1.15197	0.0647981	0.902864	0.167526	1.07488	0.129219
Ldb2	ENSRNOG00000003205	125.764	0.210541	0.385295	-0.0966067	0.662367	0.167659	0.485261	-0.139488	0.542061
Actr3	ENSRNOG00000003206	132.178	0.175476	0.540675	0.0235563	0.928803	0.057517	0.839818	-0.0944023	0.727668
Fmnl1	ENSRNOG00000003207	33.3327	0.308714	0.699264	1.30632	0.106592	-1.11493	0.192924	-0.11732	0.876919
Pcp4l1	ENSRNOG00000003209	3.94456	-0.583714	0.52993	-0.427426	0.602404	0.391847	0.657967	0.548135	0.533701
Srp9	ENSRNOG00000003211	29.0958	-0.79532	0.113539	-0.192719	0.668402	-0.36241	0.435494	0.240192	0.603894
Helz	ENSRNOG00000003213	8.57756	-0.869279	0.349797	-0.570611	0.514748	-0.563512	0.510398	-0.264844	0.762222
AABR07029742.1	ENSRNOG00000003214	2.20894	0.869964	0.575043	0.947479	0.517956	0.0951809	0.951202	0.172696	0.906235
Lgals3bp	ENSRNOG00000003217	0.922639	-0.673707	0.486934	-2.25442	0.0165811	0.80981	0.391763	-0.770901	0.40283
Zfp286a	ENSRNOG00000003218	2.43524	-2.53176	0.10496	-1.1026	0.423354	-0.143516	0.915398	1.28564	0.375812
H3f3b	ENSRNOG00000003220	357.511	0.197096	0.750468	0.797913	0.187609	-0.622245	0.335322	-0.0214272	0.970904
Degs1	ENSRNOG00000003223	77.2316	-0.591242	0.329406	0.764088	0.165689	-0.474971	0.426252	0.880359	0.132246
Mprip	ENSRNOG00000003226	56.8765	-0.606207	0.0562168	-0.295238	0.274346	0.313555	0.282272	0.624524	0.0395506
Mid1ip1	ENSRNOG00000003228	17.717	-0.613083	0.428646	-0.201172	0.763822	0.304123	0.677719	0.716035	0.331143
Tspan7	ENSRNOG00000003229	1086.13	0.231649	0.204793	-0.206167	0.233422	-0.137854	0.439707	-0.57567	0.00275656
Slc9a3r1	ENSRNOG00000003232	2.72779	-0.58156	0.628628	-0.39099	0.722369	0.50274	0.668404	0.69331	0.543976
Mgrn1	ENSRNOG00000003234	34.0439	-0.581537	0.511726	-0.102634	0.900431	-0.361486	0.668702	0.117416	0.888423
Mgat4b	ENSRNOG00000003235	10.8455	0.0894952	0.918527	-1.54883	0.0688053	0.72524	0.377143	-0.913089	0.280087
Tp53bp2	ENSRNOG00000003237	3.10408	-0.236876	0.829846	0.0592942	0.950238	0.54231	0.615786	0.83848	0.424847
Cant1	ENSRNOG00000003239	21.5026	0.52742	0.362944	-0.289998	0.558647	1.07833	0.0736526	0.260908	0.631271
Gabrg2	ENSRNOG00000003241	17.7459	-0.696718	0.226692	-0.197433	0.694109	0.0670176	0.900187	0.566303	0.297683
Wdr81	ENSRNOG00000003243	4.13724	1.9952	0.213534	-0.133368	0.931629	0.0606228	0.971146	-2.06794	0.176528
Sde2	ENSRNOG00000003247	4.18854	0.0478975	0.951165	-0.0676986	0.923598	0.248127	0.74953	0.132531	0.858144
Mpzl1	ENSRNOG00000003248	49.9501	0.830209	0.19815	0.225636	0.669362	1.20272	0.0770632	0.598149	0.321574
B3galt2	ENSRNOG00000003251	5.31854	-0.622963	0.429918	-0.71912	0.365409	-1.03186	0.166246	-1.12802	0.140654
Qdpr	ENSRNOG00000003253	88.5396	-0.248856	0.624893	0.77203	0.105447	-0.280733	0.58328	0.740153	0.135435
Il23a	ENSRNOG00000003254	0.275105	-0.0295485	0.980404	-0.614869	0.58226	-0.82156	0.500694	-1.40688	0.226744
Ccng1	ENSRNOG00000003256	95.4298	-0.390834	0.369868	-0.0683753	0.861804	-0.10706	0.797444	0.215399	0.599761
Cdc73	ENSRNOG00000003258	7.3412	0.784334	0.31568	0.212531	0.766487	0.235585	0.768481	-0.336218	0.646903
Nr1i3	ENSRNOG00000003260	8.66144	0.537102	0.553883	-1.01867	0.202493	1.29222	0.152692	-0.263554	0.757984
Usp9x	ENSRNOG00000003261	27.471	-0.370386	0.252686	-0.347826	0.255861	-0.352991	0.256467	-0.330431	0.28151
Cacng4	ENSRNOG00000003262	19.5665	1.47849	0.0952301	0.35784	0.652792	0.287143	0.752481	-0.833511	0.310874
Nat9	ENSRNOG00000003264	4.80058	0.609124	0.490243	0.0554244	0.943312	0.709817	0.425398	0.156117	0.851017
LOC100361655	ENSRNOG00000003266	0.705665	-0.433024	0.761946	-2.43087	0.0899551	1.31398	0.380044	-0.683863	0.615064
Pycr2	ENSRNOG00000003267	33.2709	0.0626062	0.899668	-1.4055	0.0065616	0.559872	0.23634	-0.908235	0.066213
Maml1	ENSRNOG00000003268	3.98004	-0.979892	0.532917	-3.86583	0.00698444	2.99523	0.0347011	0.109297	0.941509
Atp6v0e1	ENSRNOG00000003269	13.8919	-0.180338	0.741692	-0.089565	0.858565	-0.0538401	0.920063	0.0369327	0.943181
Map3k14	ENSRNOG00000003278	2.49149	0.422382	0.839359	-1.01296	0.582658	1.17201	0.555309	-0.263336	0.8939
Syce2	ENSRNOG00000003279	19.4794	0.90257	0.222756	0.169358	0.804652	0.0551599	0.941543	-0.678053	0.331081
Grin2c	ENSRNOG00000003280	0.725613	0.620925	0.65549	-1.48438	0.248045	1.79464	0.189001	-0.310658	0.813637
Mcm9	ENSRNOG00000003281	1.24017	0.990921	0.431483	-0.209936	0.870362	-1.11502	0.386877	-2.31588	0.0616404
Epn3	ENSRNOG00000003284	0.543593	-0.949009	0.582772	-0.930391	0.569399	-0.432802	0.805689	-0.414184	0.799906
Mpv17l	ENSRNOG00000003285	2.32966	-0.186899	0.874169	-0.975983	0.369256	-1.58771	0.192868	-2.3768	0.0444183
Cacng5	ENSRNOG00000003288	2.20693	1.74581	0.359253	1.81761	0.324466	-1.28692	0.505761	-1.21512	0.498992
Lap3	ENSRNOG00000003289	11.8762	-0.872058	0.16573	2.52121	0.000317038	-1.63319	0.0182202	1.76008	0.00641031
Creg1	ENSRNOG00000003291	7.00257	1.118	0.0836918	-0.143352	0.797775	0.814392	0.2117	-0.446959	0.45087
Dck	ENSRNOG00000003296	0.828515	-0.390579	0.782775	-0.883533	0.506807	-0.624192	0.664455	-1.11715	0.409683
Cd247	ENSRNOG00000003298	1.85757	1.03611	0.259963	-1.26842	0.139367	1.41579	0.12222	-0.888744	0.306864
Btg2	ENSRNOG00000003300	113.328	0.345802	0.58645	0.0840434	0.882306	0.369699	0.562872	0.10794	0.857264
Flcn	ENSRNOG00000003302	29.3824	-0.024608	0.969016	-1.23236	0.0434507	0.861941	0.161439	-0.345815	0.567085
Gcdh	ENSRNOG00000003307	22.587	0.471273	0.47753	-0.608252	0.345922	-0.0887845	0.890719	-1.16831	0.0736715
Glra2	ENSRNOG00000003313	1.34203	0.265416	0.776783	1.61749	0.0943691	-2.09506	0.0398874	-0.742991	0.406404
LOC100910121	ENSRNOG00000003326	12.9313	-0.685924	0.215427	0.328511	0.517222	-0.633559	0.236515	0.380876	0.462531
Cdip1	ENSRNOG00000003328	178.516	-0.513727	0.1798	-0.132149	0.687522	0.324097	0.371065	0.705675	0.0577675
Ppm1d	ENSRNOG00000003329	4.43768	-1.08883	0.249473	-0.512113	0.536684	-0.0119066	0.988798	0.564813	0.524645
Acsf2	ENSRNOG00000003330	2.76454	0.454945	0.551172	-0.546604	0.403992	1.33115	0.0875998	0.329602	0.647015
Nt5m	ENSRNOG00000003332	15.7966	-1.45855	0.413331	2.68555	0.120921	-3.38596	0.0615201	0.75814	0.652048
Klhl21	ENSRNOG00000003334	3.34616	0.907507	0.391776	-1.1656	0.231761	1.12174	0.281758	-0.951359	0.34481
Mybph	ENSRNOG00000003336	4.14385	-0.528644	0.625237	-0.40564	0.658747	0.832377	0.420195	0.955381	0.354557
Pmp22	ENSRNOG00000003338	3.69986	1.20657	0.200086	-1.55794	0.0822266	1.19983	0.1987	-1.56468	0.085413
Canx	ENSRNOG00000003343	67.8694	0.0214197	0.93934	-0.160943	0.537131	0.105744	0.703307	-0.0766187	0.77434
Rasd1	ENSRNOG00000003348	59.0213	0.813353	0.132634	0.461182	0.328062	0.57745	0.297155	0.225279	0.651347
Mospd2	ENSRNOG00000003350	1.3545	0.00943762	0.993376	-0.190927	0.855744	0.268715	0.810685	0.0683498	0.949456
Ogt	ENSRNOG00000003359	54.8152	-0.50378	0.156912	-0.135337	0.685083	-0.684599	0.0516856	-0.316156	0.342103
Cadm3	ENSRNOG00000003365	45.3041	-0.772881	0.0703258	-0.664035	0.0780705	0.369004	0.338574	0.477851	0.226735
Tmem220	ENSRNOG00000003367	0.9998	-2.92693	0.00865241	-1.07971	0.266363	-1.58238	0.149834	0.264849	0.7834
Ccdc85a	ENSRNOG00000003374	1.53195	-1.68954	0.245136	0.51354	0.702821	-0.508882	0.721416	1.6942	0.22021
Glrx2	ENSRNOG00000003385	21.8661	-0.230193	0.684976	-0.650476	0.246006	-0.470843	0.387516	-0.891126	0.109468
Rbfox3	ENSRNOG00000003386	41.9802	0.531412	0.468108	-1.18463	0.0767724	1.31287	0.0744628	-0.403174	0.560113
Grsf1	ENSRNOG00000003392	39.1858	-0.2465	0.771144	0.822683	0.311054	-0.766932	0.375777	0.302252	0.707182
Adprm	ENSRNOG00000003397	17.9084	-0.471316	0.591134	0.618312	0.419661	-0.0395429	0.96314	1.05009	0.213632
Tomm40l	ENSRNOG00000003398	2.73779	-0.494712	0.708255	-0.952828	0.459577	-1.39595	0.291245	-1.85407	0.149866
Hnrnph1	ENSRNOG00000003399	63.2893	0.0743765	0.809505	-0.212389	0.468922	-0.127977	0.674911	-0.414743	0.1671
Stx6	ENSRNOG00000003402	24.285	0.110903	0.844472	0.373736	0.474402	-0.0782367	0.890222	0.184596	0.730862
Slc35f5	ENSRNOG00000003403	6.66308	-0.78387	0.37125	0.0222588	0.977602	-0.337309	0.685212	0.46882	0.570625
Elac2	ENSRNOG00000003424	8.02689	0.77515	0.244817	-0.622207	0.289759	1.01224	0.13523	-0.385113	0.536342
Rufy3	ENSRNOG00000003428	21.2293	-0.485629	0.49558	-0.412078	0.530747	-0.119637	0.85933	-0.0460868	0.945361
Trove2	ENSRNOG00000003434	19.4494	0.872421	0.108117	-0.159653	0.743769	0.371174	0.489658	-0.6609	0.193996
Adora1	ENSRNOG00000003442	3.09015	1.64225	0.153078	-1.20955	0.250687	1.52741	0.187453	-1.3244	0.221011
Lypd1	ENSRNOG00000003453	22.0015	0.341871	0.715069	-0.249292	0.741307	1.42452	0.136435	0.833355	0.34877
Zfp13	ENSRNOG00000003455	1.29177	0.9932	0.487434	-1.04317	0.440028	0.721539	0.611175	-1.31483	0.335473
Zfp330	ENSRNOG00000003461	10.2848	1.34351	0.0772461	0.579124	0.412382	-0.200378	0.795832	-0.964764	0.17434
Hid1	ENSRNOG00000003464	12.8325	0.606499	0.400421	0.0724854	0.90659	0.864752	0.242336	0.330739	0.625597
MAST1	ENSRNOG00000003469	19.5725	0.641452	0.433986	0.104952	0.894039	-0.408338	0.624318	-0.944837	0.229741
Fundc1	ENSRNOG00000003470	10.5236	0.1642	0.827221	-0.154363	0.833283	-0.538219	0.47311	-0.856782	0.23833
Rnf150	ENSRNOG00000003479	6.58664	0.417352	0.632857	0.0568799	0.942601	0.235873	0.787154	-0.124599	0.880073
Prkca	ENSRNOG00000003491	11.628	-1.36155	0.266609	-0.590583	0.601553	-0.784309	0.467839	-0.0133384	0.990754
Ppfia4	ENSRNOG00000003494	3.30806	-1.46125	0.23678	0.0131512	0.989649	0.0598245	0.956596	1.53422	0.191619
Prpf8	ENSRNOG00000003495	49.1357	-0.451473	0.507002	0.484317	0.446049	-0.575744	0.393138	0.360045	0.576327
Tbc1d9	ENSRNOG00000003496	12.8265	-1.55361	0.101738	1.11587	0.178812	-0.982929	0.268994	1.68655	0.0636459
Rnaseh2a	ENSRNOG00000003504	13.0227	-0.872727	0.397744	-1.03321	0.272838	0.348582	0.707659	0.188095	0.846835
Gosr2	ENSRNOG00000003506	13.5957	-0.0735713	0.920654	-0.619253	0.320999	1.11736	0.129695	0.571681	0.416063
Ergic1	ENSRNOG00000003508	10.1867	-0.224645	0.636463	-0.173979	0.69722	-0.268377	0.564056	-0.217711	0.629343
Gabra1	ENSRNOG00000003512	149.254	0.0527794	0.856701	-0.399404	0.154555	0.069873	0.807258	-0.382311	0.178423
Ephx1	ENSRNOG00000003515	1.76901	-0.738657	0.663305	0.130717	0.935003	0.222081	0.895593	1.09146	0.499269
Prdx2	ENSRNOG00000003520	469.456	-0.792878	0.159079	0.845873	0.124272	-1.3661	0.0202219	0.272649	0.601244
Lrrc59	ENSRNOG00000003524	33.7388	-0.35998	0.53753	-0.753993	0.134285	1.10982	0.0548996	0.715811	0.202079
Clcn4	ENSRNOG00000003533	24.0521	0.834654	0.408377	0.632997	0.545251	-1.41368	0.186084	-1.61533	0.0997639
Rufy1	ENSRNOG00000003536	43.7436	0.856513	0.152753	0.641648	0.218379	0.619326	0.315694	0.40446	0.46694
Pggt1b	ENSRNOG00000003541	3.95898	-2.60106	0.0764416	-0.0731486	0.95751	-1.91185	0.153171	0.616062	0.646078
Hcfc1r1	ENSRNOG00000003542	62.3799	0.487176	0.371039	-0.300613	0.546066	0.365481	0.498661	-0.422309	0.412711
Uchl5	ENSRNOG00000003545	5.58079	0.19955	0.809274	0.01504	0.984937	-0.40129	0.628162	-0.5858	0.458086
Tnfrsf12a	ENSRNOG00000003546	2.03852	1.73997	0.295545	-0.656865	0.682317	1.92675	0.242234	-0.47008	0.7626
Cnpy2	ENSRNOG00000003549	63.4578	0.329436	0.679974	-0.0669245	0.932435	-0.657948	0.410581	-1.05431	0.173437
Acbd6	ENSRNOG00000003550	29.2244	-0.735727	0.386839	0.141858	0.869963	-1.66236	0.0546644	-0.784773	0.330264
B4galt3	ENSRNOG00000003551	103.109	-0.0708163	0.931446	0.197819	0.79515	-0.12651	0.87795	0.142126	0.855601
Ccdc112	ENSRNOG00000003559	11.6464	1.16104	0.0995895	0.602319	0.362766	-0.332772	0.646341	-0.891493	0.178127
Susd4	ENSRNOG00000003562	46.4295	-0.730462	0.17522	-0.836079	0.0819312	0.559571	0.261146	0.453954	0.367838
Blmh	ENSRNOG00000003563	17.7197	0.643237	0.47599	-0.18273	0.817047	0.860882	0.351216	0.0349162	0.967181
Ppox	ENSRNOG00000003567	7.20144	-3.31897	0.00372103	0.979068	0.282565	-1.28557	0.172429	3.01247	0.00523318
Ints2	ENSRNOG00000003576	2.72824	-0.863367	0.3817	2.20161	0.0260387	-1.84473	0.07842	1.22025	0.198121
Fem1c	ENSRNOG00000003578	5.43208	-0.287509	0.615788	0.172476	0.745084	-0.241347	0.669776	0.218638	0.68709
Pou2f1	ENSRNOG00000003581	2.94763	-2.27318	0.11831	-1.42271	0.283641	-0.315946	0.800069	0.534526	0.691659
Smyd2	ENSRNOG00000003583	28.6802	-0.972121	0.0794396	0.67363	0.168033	-0.513916	0.325841	1.13184	0.0345849
AABR07037960.1	ENSRNOG00000003588	1.91226	-0.507092	0.521371	-0.316116	0.671136	-0.145975	0.851761	0.0450012	0.951906
Tom1l2	ENSRNOG00000003590	17.5565	0.392607	0.696556	1.77632	0.0427917	0.419051	0.690932	1.80277	0.0691608
Med28	ENSRNOG00000003592	63.0087	-0.315448	0.515057	0.515556	0.270584	-0.857456	0.0858632	-0.0264517	0.953853
Tmem183a	ENSRNOG00000003594	30.4052	-0.536406	0.295248	0.089269	0.849774	-0.472179	0.342408	0.153496	0.749037
Tuba4a	ENSRNOG00000003597	270.133	-0.455302	0.275005	-0.0954869	0.798639	-0.0597966	0.880332	0.300019	0.444513
Utp3	ENSRNOG00000003599	3.25983	-0.595478	0.503246	-0.221217	0.771462	0.725989	0.393733	1.10025	0.198514
Pnpt1	ENSRNOG00000003600	4.96406	-0.554617	0.36882	-0.84697	0.162221	-0.389963	0.492728	-0.682316	0.248595
Arhgap44	ENSRNOG00000003603	4.18848	-1.52858	0.304601	-0.187993	0.886407	-0.248637	0.853897	1.09195	0.437684
RGD1561381	ENSRNOG00000003606	28.5741	-0.688753	0.313097	0.169564	0.774289	0.0631809	0.92249	0.921498	0.159558
Dynlt3	ENSRNOG00000003611	22.9158	-0.0857394	0.868049	-0.563194	0.255694	-0.0864332	0.861947	-0.563888	0.257853
Mgat5	ENSRNOG00000003614	16.3015	0.00307971	0.998416	0.188339	0.901719	-0.88881	0.571713	-0.703551	0.633399
Grem2	ENSRNOG00000003616	14.4858	0.865111	0.142046	-0.198739	0.730423	-0.571283	0.330987	-1.63513	0.0065019
Cybb	ENSRNOG00000003622	1.58263	-0.0929033	0.922446	-1.09831	0.213969	0.708387	0.435482	-0.297023	0.743381
Ubxn4	ENSRNOG00000003625	54.1609	0.429879	0.481559	-0.0910009	0.862585	0.908507	0.147257	0.387627	0.501928
Atp5h	ENSRNOG00000003626	98.8764	0.210241	0.692258	0.313873	0.544063	-0.613678	0.257965	-0.510046	0.316905
Nvl	ENSRNOG00000003629	6.92292	1.25762	0.191602	-0.907643	0.285231	1.27118	0.190767	-0.894082	0.322193
Zfp354a	ENSRNOG00000003634	3.82864	-1.61689	0.18706	1.43701	0.222247	-1.96086	0.105891	1.09304	0.341715
Disp1	ENSRNOG00000003635	1.06501	-0.551635	0.730276	-2.75995	0.0730056	-0.493063	0.752112	-2.70138	0.0868112
Hnrnpab	ENSRNOG00000003645	61.8079	0.521727	0.224171	-0.215567	0.59307	-0.0705069	0.867093	-0.807801	0.0543727
Qsox1	ENSRNOG00000003649	1.05137	0.568036	0.664349	-0.0738297	0.95076	1.24826	0.337154	0.606397	0.625452
Fh	ENSRNOG00000003653	57.875	0.250801	0.576113	0.565895	0.177	-0.166944	0.714235	0.14815	0.726995
Hn1	ENSRNOG00000003661	241.007	0.972873	0.17318	-0.362192	0.581994	0.36004	0.61087	-0.975025	0.15134
AABR07030781.1	ENSRNOG00000003670	80.4025	0.206511	0.693426	-0.281668	0.558074	0.291976	0.574409	-0.196204	0.692857
Nup85	ENSRNOG00000003673	15.7993	0.56035	0.379574	-0.159855	0.779652	0.470178	0.468443	-0.250027	0.676732
Pir	ENSRNOG00000003674	2.41044	-1.98269	0.142242	-0.0735593	0.952077	-0.179357	0.88912	1.72977	0.175318
Ptchd1	ENSRNOG00000003675	3.65596	-0.295378	0.669237	-0.489884	0.450761	-0.0855297	0.896569	-0.280036	0.669776
Med13	ENSRNOG00000003679	7.95977	0.124863	0.846644	-0.352806	0.590957	-0.92412	0.154785	-1.40179	0.0313468
Gabrb2	ENSRNOG00000003680	4.45883	-3.19811	0.0148638	0.436853	0.713333	-2.69024	0.0222472	0.944725	0.416502
Hook2	ENSRNOG00000003682	2.59952	0.0217831	0.981615	-1.30487	0.160813	0.210595	0.815391	-1.11606	0.223109
Tbl1x	ENSRNOG00000003686	12.0246	-1.21538	0.0160738	0.25738	0.55877	-1.10485	0.0198249	0.36791	0.410349
Rgs2	ENSRNOG00000003687	47.4632	0.320404	0.559705	-0.357797	0.487739	0.12003	0.824099	-0.558171	0.289267
Nono	ENSRNOG00000003689	29.0135	-0.815237	0.21693	-0.25163	0.65836	0.187364	0.757225	0.750971	0.229908
Tmed7	ENSRNOG00000003691	19.8853	0.441057	0.297409	-0.447974	0.266927	0.0520787	0.899865	-0.836953	0.0453025
Endov	ENSRNOG00000003699	1.22972	0.51834	0.685285	1.24278	0.304573	-1.59007	0.216821	-0.865629	0.477623
Mcm6	ENSRNOG00000003703	1.44277	1.0213	0.455498	2.45622	0.0710561	-1.88724	0.190565	-0.452323	0.726189
Ufc1	ENSRNOG00000003706	61.6872	0.0563965	0.932937	0.00108014	0.998644	-0.197801	0.765735	-0.253117	0.691166
Zmym3	ENSRNOG00000003707	8.74455	-0.130074	0.879467	-0.3054	0.671722	0.895504	0.287352	0.720178	0.378567
Smek2	ENSRNOG00000003712	6.20434	-1.35142	0.0282384	0.32212	0.571923	-1.65796	0.00610352	0.0155783	0.977296
Clk4	ENSRNOG00000003714	64.1639	0.0116415	0.977689	-0.0119959	0.976057	-0.46763	0.265698	-0.491267	0.222776
Cnih4	ENSRNOG00000003717	5.72977	-1.13526	0.444018	0.29569	0.83627	-1.35719	0.336484	0.0737586	0.957915
Atpaf2	ENSRNOG00000003719	18.5228	-1.92185	0.00598277	-0.298069	0.594678	-0.579898	0.300893	1.04388	0.0943851
Wdr26	ENSRNOG00000003723	41.5661	-0.446393	0.149996	0.0215842	0.936651	0.0147881	0.959709	0.482765	0.103304
Mrpl27	ENSRNOG00000003724	46.3626	-1.18287	0.147506	0.231767	0.738421	-0.262934	0.724507	1.1517	0.13744
Xylt2	ENSRNOG00000003728	1.88697	-0.0064224	0.995489	-1.05738	0.316337	0.513679	0.635401	-0.537279	0.619578
Flrt2	ENSRNOG00000003732	20.856	-0.497929	0.669443	1.10898	0.347261	-1.99139	0.101533	-0.384481	0.727639
Nptx1	ENSRNOG00000003741	706.211	-0.393045	0.312564	0.120607	0.711015	0.480979	0.206111	0.994631	0.0119642
Cdkl5	ENSRNOG00000003742	11.3893	0.763351	0.296596	-0.279913	0.671923	0.666001	0.367106	-0.377264	0.582431
Dars	ENSRNOG00000003743	12.8921	-0.867373	0.228581	-0.259245	0.706489	-0.99893	0.14238	-0.390802	0.562298
Atf3	ENSRNOG00000003745	0.919525	-0.2231	0.858682	-0.414729	0.729655	-0.83297	0.505204	-1.0246	0.393191
Asna1	ENSRNOG00000003747	16.7217	1.04284	0.137944	-0.234374	0.712417	0.517946	0.46587	-0.759265	0.249443
Xk	ENSRNOG00000003749	5.51238	0.487793	0.546663	1.16632	0.13475	-0.491807	0.564788	0.186715	0.807392
Lancl3	ENSRNOG00000003756	1.01638	2.47857	0.102839	1.19523	0.380294	-0.677312	0.627376	-1.96065	0.169634
Galc	ENSRNOG00000003759	0.643575	-2.20435	0.101601	-1.68597	0.177658	-1.47157	0.278956	-0.953197	0.442769
Smarca1	ENSRNOG00000003762	2.98517	-1.08996	0.260264	-0.837596	0.365299	-0.662029	0.445569	-0.409664	0.652504
Prdx4	ENSRNOG00000003763	17.2449	-0.0784133	0.917688	-0.380011	0.59983	-0.229339	0.75731	-0.530936	0.464064
Rps6kc1	ENSRNOG00000003767	56.4823	-0.78195	0.198065	-0.638715	0.262047	-0.28962	0.606765	-0.146385	0.795569
Tmem163	ENSRNOG00000003769	12.1215	-0.95035	0.211784	-0.374988	0.531595	0.913224	0.191096	1.48859	0.044867
Csrp2	ENSRNOG00000003772	17.6384	1.24985	0.410873	-2.06781	0.124283	2.44265	0.10333	-0.875011	0.541264
Hmox2	ENSRNOG00000003773	14.6571	-0.835432	0.22932	0.343227	0.574693	-0.32198	0.622099	0.856679	0.195067
Opn3	ENSRNOG00000003778	5.99959	-0.411859	0.68282	-0.782142	0.405975	0.0408171	0.965895	-0.329467	0.730568
Dedd	ENSRNOG00000003779	5.81073	-1.92185	0.105371	0.591423	0.567489	-0.682997	0.529814	1.83027	0.10428
Acot9	ENSRNOG00000003782	26.0478	0.065568	0.907087	-0.670997	0.223563	-0.0762076	0.888589	-0.812772	0.138938
Tspan6	ENSRNOG00000003786	11.3856	0.21059	0.762937	-0.934845	0.16943	0.24701	0.714034	-0.898425	0.185131
Lcorl	ENSRNOG00000003787	2.40994	-3.12255	0.0552549	-0.724229	0.627618	-1.8344	0.257676	0.563919	0.701819
Med14	ENSRNOG00000003792	3.79363	0.0820728	0.953961	1.73684	0.21677	-1.47086	0.329112	0.183905	0.891664
Nmral1	ENSRNOG00000003794	4.50699	-0.257193	0.824032	0.402906	0.700263	0.19876	0.862388	0.858859	0.436812
Angel2	ENSRNOG00000003795	46.7678	0.036789	0.925953	-1.33541	0.00135678	0.840383	0.0349299	-0.531818	0.167905
Mrps7	ENSRNOG00000003797	35.1902	0.395286	0.710731	-0.879728	0.403042	0.0914643	0.928932	-1.18355	0.249513
Zdhhc17	ENSRNOG00000003803	5.35043	-0.842523	0.473404	-2.85817	0.0204908	0.371818	0.704827	-1.64382	0.154177
Rnft1	ENSRNOG00000003805	0.815991	1.05458	0.418522	-1.63694	0.190643	0.916509	0.482855	-1.77501	0.158712
Sat1	ENSRNOG00000003809	53.9571	0.499945	0.403145	-1.23281	0.0485057	-0.0608305	0.914353	-1.79358	0.00437411
Nlgn3	ENSRNOG00000003812	8.21945	0.600284	0.360647	0.735376	0.236196	-0.236943	0.727233	-0.101852	0.868849
Kcnk10	ENSRNOG00000003813	1.6141	-0.525749	0.760803	0.830289	0.620652	-1.85488	0.284262	-0.498847	0.760732
Slc25a11	ENSRNOG00000003815	92.9385	-0.246189	0.628898	0.125843	0.795087	-0.546901	0.283509	-0.174869	0.717112
Tada1	ENSRNOG00000003816	12.3824	-0.685664	0.304328	-1.29708	0.0477899	0.096131	0.87257	-0.515283	0.415389
Rptor	ENSRNOG00000003821	4.27994	-0.56652	0.337409	-1.41564	0.0102601	1.0968	0.0487305	0.247672	0.65571
Slu7	ENSRNOG00000003822	23.3968	0.911943	0.141932	0.888	0.142111	-0.70835	0.274681	-0.732293	0.210835
Wdr75	ENSRNOG00000003825	13.6622	-0.117132	0.837245	-0.922045	0.0918629	0.399007	0.464392	-0.405906	0.456639
Wipi1	ENSRNOG00000003827	0.794632	0.46829	0.765225	-0.41368	0.787739	1.58532	0.31692	0.703351	0.636806
Ap3s1	ENSRNOG00000003829	49.5062	0.220845	0.561608	0.0525941	0.884878	-0.366488	0.340604	-0.534739	0.148035
Tdp1	ENSRNOG00000003831	1.59991	-0.466246	0.72813	1.33925	0.289255	0.718015	0.602066	2.52351	0.0586136
Nenf	ENSRNOG00000003833	30.0817	-1.37502	0.0786222	0.0363214	0.95624	-0.299852	0.667449	1.11149	0.129956
Map2k4	ENSRNOG00000003834	20.5282	0.73411	0.545512	1.24434	0.224864	0.580892	0.645054	1.09112	0.344644
Slc43a2	ENSRNOG00000003835	9.80031	0.0039607	0.994556	-0.807174	0.152182	0.123275	0.824601	-0.68786	0.221417
Mif4gd	ENSRNOG00000003837	3.00054	1.08514	0.406981	-1.29493	0.282702	2.10543	0.102885	-0.274629	0.823488
Slit2	ENSRNOG00000003840	8.21268	-0.508436	0.232045	-0.296578	0.44339	-0.09012	0.821661	0.121738	0.758867
Kcnh1	ENSRNOG00000003841	28.9124	0.683358	0.183917	-0.248543	0.590712	0.513784	0.31874	-0.418116	0.384712
Dhx15	ENSRNOG00000003844	13.3313	-0.303208	0.600678	-0.0117859	0.98234	-0.156961	0.780894	0.134462	0.806151
Wnt3	ENSRNOG00000003845	1.4683	-3.35895	0.051475	-1.35827	0.38559	0.421099	0.796542	2.42177	0.130699
Pitpna	ENSRNOG00000003846	49.5732	-0.821576	0.0357781	-0.283946	0.415267	-0.503014	0.160428	0.0346159	0.921208
Gid4	ENSRNOG00000003847	27.855	-0.728958	0.125084	-0.402177	0.305051	0.751502	0.0929796	1.07828	0.0212842
Stx8	ENSRNOG00000003849	140.876	-0.0671073	0.940202	-1.2501	0.129257	0.991546	0.248346	-0.191446	0.821672
Scoc	ENSRNOG00000003853	69.6056	0.411399	0.276003	-0.178556	0.612099	-0.0232478	0.950072	-0.613203	0.0941349
Dnaja3	ENSRNOG00000003855	32.0651	-1.485	0.0874225	-0.561329	0.452752	-0.1625	0.827445	0.761168	0.344533
Atp6ap2	ENSRNOG00000003858	136.009	-0.0578802	0.916678	0.0163869	0.974493	-0.0636372	0.907136	0.0106298	0.983837
Gorab	ENSRNOG00000003861	4.40666	-0.412216	0.552942	0.660069	0.310731	-0.675824	0.331271	0.39646	0.54746
LOC100910447	ENSRNOG00000003863	94.4677	-0.957086	0.246883	0.950901	0.151955	0.483517	0.534443	2.3915	0.00497026
Gipc1	ENSRNOG00000003864	25.3603	-0.890863	0.197125	-1.26169	0.0225145	1.86467	0.00513355	1.49384	0.0276931
Tmigd1	ENSRNOG00000003865	1.01315	-1.079	0.168911	-0.0858405	0.902042	-0.252907	0.727936	0.740252	0.314334
Sod3	ENSRNOG00000003869	0.317298	1.36142	0.231608	-1.70857	0.130539	2.48651	0.0368837	-0.583487	0.582952
LOC100911874	ENSRNOG00000003872	1.58504	-2.19284	0.0774733	-0.782269	0.509705	-2.26512	0.0543792	-0.854549	0.45303
Cpd	ENSRNOG00000003873	52.7843	0.493974	0.275628	0.270024	0.523376	-0.137331	0.763593	-0.361281	0.397737
Ocrl	ENSRNOG00000003875	6.51392	-0.0489106	0.959911	-0.177307	0.84079	0.308938	0.746311	0.180541	0.844916
Rnf167	ENSRNOG00000003879	23.1294	-0.112336	0.911304	-0.626035	0.508416	0.300097	0.758451	-0.213601	0.823503
Nit1	ENSRNOG00000003881	129.553	0.0874579	0.830766	-0.635196	0.104513	0.326337	0.415382	-0.396317	0.313744
Cep350	ENSRNOG00000003882	7.21574	0.438312	0.690231	-1.2972	0.241581	0.0594961	0.954009	-1.67602	0.119722
Lgi2	ENSRNOG00000003887	4.63344	-0.150551	0.8527	-0.385134	0.56742	1.14881	0.151438	0.914222	0.240353
Rgs13	ENSRNOG00000003888	0.816438	-2.52363	0.109475	-0.318999	0.826303	-1.77607	0.261942	0.428564	0.767018
Tbc1d15	ENSRNOG00000003889	5.91983	-0.911122	0.28841	-1.33248	0.111737	-0.224656	0.764388	-0.646014	0.427701
Nap1l1	ENSRNOG00000003890	53.5178	-0.293333	0.409331	-0.140494	0.683874	-0.764474	0.0354867	-0.611635	0.0793148
Porf1	ENSRNOG00000003891	4.18535	-1.67745	0.190307	-0.446262	0.709823	-0.985223	0.4299	0.245966	0.835949
Ccdc104	ENSRNOG00000003901	19.9217	-0.240917	0.631412	-0.549101	0.243448	0.132186	0.783954	-0.175999	0.711591
Nsf	ENSRNOG00000003905	206.439	-0.0702682	0.812639	-0.136984	0.615611	0.0690412	0.812572	0.00232496	0.993397
Tmem206	ENSRNOG00000003915	24.0449	-0.335328	0.604389	0.985475	0.0865196	0.142131	0.826321	1.46293	0.0250907
Uck2	ENSRNOG00000003917	2.56424	3.36096	0.00139312	-1.05677	0.23563	2.74389	0.00707256	-1.67384	0.064436
LOC100910173	ENSRNOG00000003918	3.63965	-0.41991	0.714968	-0.166301	0.877785	-0.327618	0.770197	-0.0740081	0.94583
Rps6kb1	ENSRNOG00000003919	23.7554	-0.929775	0.323715	-0.695359	0.448303	-0.852999	0.327341	-0.618583	0.487147
Rab21	ENSRNOG00000003923	30.8142	-0.00624804	0.988815	-0.441057	0.301799	-0.0411599	0.924289	-0.475969	0.268445
Tmco1	ENSRNOG00000003928	37.6922	-0.0172119	0.973215	-0.636483	0.212837	-0.379241	0.442917	-0.998513	0.0514421
Pcdh19	ENSRNOG00000003929	23.8152	0.242584	0.592162	-0.766599	0.0791353	0.520377	0.243654	-0.488805	0.261602
Arsg	ENSRNOG00000003931	2.43163	-0.527661	0.563011	0.43786	0.568621	0.36897	0.675655	1.33449	0.131354
Pwwp2a	ENSRNOG00000003936	5.79567	-0.382117	0.619153	-0.163293	0.808244	0.338045	0.644761	0.556869	0.446578
Asnsd1	ENSRNOG00000003942	15.3266	-0.0946357	0.8574	-0.354447	0.487473	-0.408113	0.430355	-0.667925	0.191427
Tor1aip1	ENSRNOG00000003946	4.31997	-1.59447	0.0844372	-0.458289	0.541374	0.249881	0.753273	1.38606	0.111742
Llgl1	ENSRNOG00000003948	3.78274	-0.867853	0.535	-0.239876	0.855388	-0.55825	0.671046	0.0697273	0.957958
Phka2	ENSRNOG00000003949	0.523685	-2.37834	0.061929	2.28233	0.0596976	-2.43821	0.0575243	2.22247	0.0655906
Psmc1	ENSRNOG00000003951	113.97	-0.29927	0.48685	0.0726086	0.852359	-0.0322785	0.93861	0.3396	0.406669
Rab3gap1	ENSRNOG00000003953	5.23106	-0.36267	0.727746	-0.319391	0.725422	0.567476	0.572103	0.610755	0.537218
Spata7	ENSRNOG00000003955	15.254	0.639684	0.444598	0.372309	0.625355	0.0920522	0.913671	-0.175323	0.823917
Commd10	ENSRNOG00000003958	32.7255	0.183212	0.846911	-0.927702	0.339152	-0.448257	0.617261	-1.55917	0.0951963
Nsmce2	ENSRNOG00000003964	9.26551	-2.37711	0.0607222	-0.651646	0.53564	-0.249661	0.80971	1.4758	0.210791
Vmp1	ENSRNOG00000003967	55.0483	-0.382615	0.37196	-0.230641	0.560372	-0.162363	0.692764	-0.0103892	0.979401
Tnpo2	ENSRNOG00000003970	23.2514	-0.25087	0.66593	0.223511	0.683596	-0.482123	0.406556	-0.0077425	0.988766
Gosr1	ENSRNOG00000003971	27.391	-0.356894	0.51003	-0.125794	0.809953	-0.719476	0.178756	-0.488377	0.345107
Cyb5r1	ENSRNOG00000003973	44.2986	-0.959908	0.358704	0.834625	0.403534	-1.5574	0.133535	0.237133	0.809187
Pfn1	ENSRNOG00000003975	39.6999	0.387422	0.546216	0.208443	0.683491	1.36643	0.0450134	1.18745	0.0595022
Dusp1	ENSRNOG00000003977	160.833	0.114545	0.77482	0.0388038	0.915641	0.0405952	0.918761	-0.035146	0.92617
Zranb3	ENSRNOG00000003979	10.2604	1.95899	0.0290055	-0.664902	0.40735	0.832356	0.34618	-1.79154	0.0346799
Ttc1	ENSRNOG00000003980	34.0797	0.0286631	0.958816	0.238781	0.640852	-0.104328	0.85081	0.10579	0.84079
Zfp18	ENSRNOG00000003981	4.84879	-1.32709	0.286022	-1.57979	0.13058	1.66399	0.143072	1.4113	0.232641
Pfdn2	ENSRNOG00000003983	41.4815	-0.0687859	0.885272	-0.239345	0.584624	0.181632	0.696664	0.0110731	0.980456
Apln	ENSRNOG00000003984	2.67442	-1.35805	0.291438	-1.4231	0.24523	-0.411348	0.717523	-0.476395	0.694458
Tmem19	ENSRNOG00000003985	23.8891	0.235291	0.654765	-0.553825	0.264697	0.237073	0.645836	-0.552043	0.275257
Dnajc27	ENSRNOG00000003988	42.2261	0.525307	0.34134	0.181231	0.732146	-0.361487	0.516805	-0.705563	0.183065
Grb2	ENSRNOG00000003990	230.966	-0.186574	0.706128	-0.433589	0.31875	0.740744	0.129917	0.493729	0.297997
Adcy3	ENSRNOG00000003999	7.33742	-0.671014	0.360009	-0.0960463	0.880228	0.242884	0.726893	0.817851	0.242334
Tefm	ENSRNOG00000004000	2.70619	0.777401	0.523377	-1.05442	0.345818	1.2958	0.281393	-0.536022	0.641801
Osgepl1	ENSRNOG00000004001	14.5465	-0.704179	0.59483	-0.943275	0.466278	-0.711366	0.556292	-0.950462	0.452709
Dusp10	ENSRNOG00000004003	4.18994	0.234255	0.847757	1.78608	0.0742773	1.27634	0.310755	2.82816	0.0215605
Dnajb9	ENSRNOG00000004006	20.0545	-0.0775849	0.867523	-0.0663923	0.880477	-0.368298	0.424348	-0.357105	0.422295
Grip1	ENSRNOG00000004013	2.69528	1.66328	0.168902	1.54717	0.131508	1.20332	0.348133	1.08721	0.336125
Chmp6	ENSRNOG00000004014	22.7192	-1.2697	0.0875895	-0.265315	0.689049	-0.563999	0.400441	0.440385	0.519089
Msl3	ENSRNOG00000004016	32.9045	0.132534	0.895275	-0.184364	0.827222	0.91361	0.359993	0.596713	0.532008
Phlda1	ENSRNOG00000004019	6.94411	-0.208066	0.732376	0.840156	0.165948	-1.09844	0.0862728	-0.0502175	0.930556
Atp2b1	ENSRNOG00000004026	537.406	-0.0917973	0.637694	-0.208638	0.250329	0.0592326	0.754932	-0.0576084	0.754971
Aldh9a1	ENSRNOG00000004027	13.1983	-0.321506	0.642201	0.330345	0.612774	-0.465277	0.49927	0.186573	0.775856
Nphs2	ENSRNOG00000004030	1.88264	0.0433094	0.962039	0.86241	0.304064	0.228448	0.803029	1.04755	0.233572
2310067B10Rik	ENSRNOG00000004032	23.155	-1.41062	0.14939	1.99398	0.0328292	-1.54446	0.112703	1.86014	0.0504057
Sema6a	ENSRNOG00000004033	1.19663	-1.29284	0.411382	-2.16625	0.143696	-0.428494	0.780259	-1.30191	0.383675
Krr1	ENSRNOG00000004035	7.75342	-0.688037	0.462832	1.96602	0.0346698	-1.43463	0.142106	1.21942	0.177768
Snx12	ENSRNOG00000004036	12.7804	0.130589	0.85065	-0.144285	0.825168	-0.0929294	0.892447	-0.367803	0.577582
Abca8	ENSRNOG00000004040	3.09276	-1.03237	0.350421	0.825966	0.389272	-0.412286	0.694809	1.44605	0.172822
Lrrk2	ENSRNOG00000004048	6.29583	-1.91138	0.0258318	-0.236303	0.768346	-1.96585	0.0115428	-0.29077	0.703928
Baiap2	ENSRNOG00000004049	184.37	-0.158991	0.765025	0.221725	0.604875	1.15699	0.0362007	1.53771	0.00565431
Snrk	ENSRNOG00000004050	3.44113	0.52032	0.683546	0.214702	0.853954	0.12878	0.921477	-0.176838	0.883652
Ccdc88a	ENSRNOG00000004057	6.16848	-0.971428	0.289789	0.0800317	0.930275	-1.70179	0.0573559	-0.650329	0.451456
Ptrhd1	ENSRNOG00000004059	4.66463	2.24156	0.111624	-1.69013	0.203941	1.75808	0.208279	-2.17361	0.104416
Calm1	ENSRNOG00000004060	1921.8	-0.045827	0.843995	0.0702777	0.738106	0.0772328	0.737289	0.193337	0.385637
Pnn	ENSRNOG00000004061	7.21691	0.846492	0.154809	-0.630473	0.256344	0.379409	0.514901	-1.09756	0.0571539
Nrcam	ENSRNOG00000004067	56.5095	-0.537	0.114303	0.361671	0.248387	-0.664187	0.0503611	0.234484	0.455517
Ncoa1	ENSRNOG00000004068	65.9762	0.178924	0.761402	-1.06847	0.0580735	0.770314	0.182526	-0.477076	0.397556
Myo1c	ENSRNOG00000004072	0.601959	0.840948	0.569652	-0.384805	0.78329	0.395496	0.787308	-0.830257	0.554201
Ccdc42	ENSRNOG00000004075	1.54173	0.694979	0.694462	-2.41434	0.143287	1.54027	0.376849	-1.56905	0.354221
Pms1	ENSRNOG00000004076	1.26065	-0.532915	0.586495	1.25174	0.161924	-0.0103188	0.991656	1.77434	0.0668143
Kcnc2	ENSRNOG00000004077	27.1412	0.448075	0.236538	-0.462625	0.184026	0.501888	0.184642	-0.408812	0.254061
Zc3h14	ENSRNOG00000004083	21.4681	0.88634	0.233706	-0.177062	0.792993	0.528193	0.481335	-0.53521	0.443278
Fam84a	ENSRNOG00000004084	60.8124	0.332094	0.388103	-0.353158	0.317863	0.411678	0.28338	-0.273574	0.452267
Tcaim	ENSRNOG00000004085	4.30637	-1.38061	0.167381	1.37718	0.126581	-0.84149	0.385102	1.9163	0.0490534
Enpp2	ENSRNOG00000004089	18.7629	0.359689	0.477436	-0.325451	0.468389	0.734727	0.152648	0.0495864	0.917074
AABR07016056.1	ENSRNOG00000004090	9.7265	0.186935	0.818249	0.0825168	0.90619	0.704677	0.386622	0.600259	0.438459
Cwc25	ENSRNOG00000004091	8.01579	-1.07508	0.405846	1.11537	0.319321	-0.380449	0.758794	1.81	0.146741
Rhot1	ENSRNOG00000004093	12.7346	0.0941621	0.817064	0.0667626	0.864568	-0.481031	0.242517	-0.508431	0.197666
R3hdm1	ENSRNOG00000004099	25.3439	-0.118909	0.749725	-0.488341	0.177458	-0.168541	0.641656	-0.537972	0.139414
Trib1	ENSRNOG00000004100	3.27557	-0.290239	0.838192	0.517208	0.698311	-0.4787	0.736963	0.328747	0.80741
Trappc6b	ENSRNOG00000004103	25.3198	-0.411185	0.391193	0.0280776	0.951461	-0.812303	0.0897655	-0.37304	0.411943
Zfp167	ENSRNOG00000004104	1.32717	-0.15953	0.873179	-0.159447	0.863587	-0.125265	0.897522	-0.125182	0.894969
Rpl23	ENSRNOG00000004107	115.184	-0.218085	0.587814	-0.213407	0.576665	-0.293364	0.455709	-0.288686	0.45133
Zfpm2	ENSRNOG00000004109	5.0692	0.170607	0.845935	-1.04809	0.203314	0.715154	0.395871	-0.503542	0.547614
Trib2	ENSRNOG00000004110	28.5451	0.94495	0.248589	0.424003	0.573469	0.0293835	0.972051	-0.491564	0.522122
Kcnv1	ENSRNOG00000004117	32.1842	0.294551	0.52807	0.61795	0.182358	-0.766778	0.119427	-0.443379	0.320654
Frmpd4	ENSRNOG00000004118	5.9135	-0.677345	0.456157	0.502609	0.573103	-1.5013	0.101246	-0.321346	0.707723
RGD1565844	ENSRNOG00000004120	5.7494	-4.48877	0.0128645	0.987309	0.539308	-3.26897	0.0659107	2.20711	0.170961
C4bpb	ENSRNOG00000004125	0.628636	-1.04807	0.387868	1.36513	0.227305	-2.3678	0.0594572	0.0453978	0.968222
AABR07021840.1	ENSRNOG00000004127	8.33763	-1.09849	0.204031	0.233806	0.746565	-0.0561973	0.943547	1.2761	0.122943
Anapc4	ENSRNOG00000004130	40.2686	-0.754678	0.238965	-0.642748	0.27394	-0.0719487	0.902052	0.0399821	0.946698
Pkn1	ENSRNOG00000004131	4.03641	-0.304998	0.714132	-0.889996	0.172665	1.96236	0.0191813	1.37737	0.0889029
Lasp1	ENSRNOG00000004132	20.8105	0.732025	0.152527	0.783678	0.091142	0.269285	0.607167	0.320939	0.49929
Slc7a3	ENSRNOG00000004133	3.73785	-0.226706	0.89071	1.34215	0.381843	-0.551125	0.742991	1.01773	0.51774
RGD1311745	ENSRNOG00000004135	4.21344	-1.69849	0.0708751	-0.545583	0.53192	-1.12645	0.189046	0.0264616	0.975315
Ubtd2	ENSRNOG00000004137	9.46516	0.037225	0.951647	1.20841	0.0409289	-0.436356	0.494687	0.73483	0.216468
Ndel1	ENSRNOG00000004139	25.0259	-0.812496	0.0985746	-0.0777989	0.852901	-0.0432812	0.923522	0.691416	0.135446
Pacrgl	ENSRNOG00000004140	7.17387	0.820659	0.382724	-0.131626	0.889295	-0.852122	0.36907	-1.80441	0.0517517
Vasn	ENSRNOG00000004141	5.2008	-0.563116	0.608967	0.770907	0.403933	0.259536	0.809839	1.59356	0.135122
Adipor1	ENSRNOG00000004143	61.5354	-0.00760971	0.988427	-0.509888	0.276008	0.831746	0.114029	0.329468	0.509659
AABR07001435.1	ENSRNOG00000004144	1.22065	-0.976863	0.421246	0.378116	0.74519	-0.0280237	0.98157	1.32696	0.253676
Prorsd1	ENSRNOG00000004145	2.96854	-2.40049	0.123945	-0.764892	0.600085	-0.100255	0.948108	1.53534	0.291407
Coro7	ENSRNOG00000004146	6.97316	-0.878478	0.543176	1.29336	0.253725	1.25832	0.383839	3.43016	0.0182923
Cdk17	ENSRNOG00000004148	56.0908	0.0681258	0.8655	0.203392	0.598359	-0.526881	0.20098	-0.391615	0.311267
Mgat4c	ENSRNOG00000004149	1.32338	-1.08161	0.404339	-0.734751	0.555746	-1.47239	0.248343	-1.12553	0.361346
Slc9a7	ENSRNOG00000004150	5.44895	-1.91525	0.374314	0.964641	0.639364	-1.81209	0.377624	1.0678	0.599468
Lrp12	ENSRNOG00000004152	12.4636	0.21686	0.633842	-1.25233	0.0074267	0.669104	0.132988	-0.800087	0.0755045
Hdac9	ENSRNOG00000004158	3.04559	0.270999	0.725336	-1.86849	0.0134203	1.35509	0.0686377	-0.784404	0.291233
Flii	ENSRNOG00000004159	35.8622	-0.911411	0.0802877	0.886378	0.048205	-0.147684	0.760359	1.65011	0.00219352
Prps2	ENSRNOG00000004160	11.4294	0.386889	0.379902	0.389334	0.359286	-0.513759	0.255214	-0.511313	0.225669
Mtif2	ENSRNOG00000004161	12.3502	-0.958615	0.170923	-0.388575	0.55232	-0.730924	0.25951	-0.160884	0.80438
Pfkfb2	ENSRNOG00000004162	5.72862	-0.00936347	0.99165	0.56891	0.533833	-1.47253	0.112985	-0.894261	0.29801
Prkd1	ENSRNOG00000004165	0.935748	-0.243049	0.86023	-0.364157	0.783607	-2.01564	0.155602	-2.13675	0.114567
Slc35e4	ENSRNOG00000004168	10.4304	0.484647	0.650548	-0.55392	0.578571	0.432516	0.683575	-0.606051	0.551186
Fzr1	ENSRNOG00000004169	15.0315	-1.77237	0.240378	-1.19041	0.37387	-0.0424443	0.973488	0.539516	0.704161
Dnah9	ENSRNOG00000004171	1.40698	-0.0455932	0.962549	-1.37392	0.165616	-0.231249	0.798266	-1.55957	0.103032
Pdk2	ENSRNOG00000004172	4.39734	-1.46302	0.126044	-2.18084	0.0153166	0.760892	0.357639	0.0430675	0.961146
Fam19a2	ENSRNOG00000004180	7.08705	0.150432	0.823734	-0.0304702	0.963545	-0.73245	0.279834	-0.913352	0.164386
Sdccag8	ENSRNOG00000004181	6.41224	-0.195937	0.816279	0.393815	0.613772	-0.285923	0.73408	0.303829	0.704378
Ccdc59	ENSRNOG00000004183	4.87497	-0.958371	0.403213	-0.493019	0.637815	-0.0994667	0.924696	0.365885	0.735212
Mon2	ENSRNOG00000004185	10.3449	-0.00215447	0.998217	0.424566	0.655532	-0.945953	0.333367	-0.519233	0.571633
Snx13	ENSRNOG00000004186	2.61934	-1.21415	0.293293	0.978983	0.379622	-1.63021	0.153985	0.562918	0.603472
Helb	ENSRNOG00000004189	2.89058	-2.05567	0.153062	0.218938	0.872364	-1.98733	0.135514	0.287279	0.829269
Klhl12	ENSRNOG00000004193	63.167	-0.0909112	0.866641	-0.826443	0.0979279	0.795839	0.13722	0.0603072	0.906425
Rps29	ENSRNOG00000004196	96.1319	-0.695079	0.253998	-0.260289	0.62685	0.0411874	0.942112	0.475978	0.40634
Stxbp6	ENSRNOG00000004198	3.02858	0.323474	0.779642	1.53749	0.182694	-1.7265	0.155224	-0.512484	0.640936
Sybu	ENSRNOG00000004200	17.5396	-0.092033	0.851173	0.631963	0.178379	-0.52029	0.300831	0.203706	0.662226
Rims2	ENSRNOG00000004201	12.4251	-0.0577997	0.895862	-0.363181	0.399837	-0.419832	0.334798	-0.725214	0.0955746
Pkdcc	ENSRNOG00000004205	3.36233	-0.0344178	0.977418	-0.680101	0.520484	1.51418	0.209215	0.868494	0.45365
Glrx5	ENSRNOG00000004206	24.1068	-0.0472347	0.928799	-0.567059	0.221908	0.943187	0.0781958	0.423363	0.401467
Eml5	ENSRNOG00000004207	3.66392	-1.50003	0.0499414	-0.818348	0.252206	-1.00772	0.12912	-0.32604	0.639173
Crim1	ENSRNOG00000004208	17.5949	-0.201469	0.756696	0.359363	0.54673	-0.205392	0.75045	0.35544	0.565512
Fbxw9	ENSRNOG00000004212	63.4591	-0.473707	0.570395	0.365485	0.657641	-1.27237	0.135802	-0.43318	0.583948
Rpl26	ENSRNOG00000004214	59.6791	-0.298971	0.572797	-0.396794	0.426811	-0.158978	0.754349	-0.256801	0.609634
Klhl28	ENSRNOG00000004218	3.27558	-0.530634	0.364363	0.280749	0.604313	-0.558737	0.329771	0.252646	0.646254
Dhps	ENSRNOG00000004219	117.907	0.11699	0.862944	-0.405132	0.507885	0.562565	0.404909	0.0404439	0.949765
Ebag9	ENSRNOG00000004220	6.24564	-0.761692	0.235093	-0.780941	0.205662	-0.413884	0.481262	-0.433133	0.472533
Tac3	ENSRNOG00000004229	15.8985	-0.330042	0.826544	-1.33082	0.376924	-0.466016	0.742582	-1.4668	0.311487
G2e3	ENSRNOG00000004232	2.18086	1.54145	0.16922	-1.1604	0.328882	-1.39899	0.209597	-4.10083	0.000697225
Mgat2	ENSRNOG00000004234	15.9381	0.00271384	0.995705	-0.412301	0.3734	0.357669	0.470392	-0.0573451	0.904528
Mgst3	ENSRNOG00000004245	287.269	-0.0919445	0.811977	-0.145762	0.662641	0.691807	0.0797618	0.637989	0.0928115
Spag7	ENSRNOG00000004246	32.9215	0.155182	0.80455	0.701511	0.243243	-0.488965	0.449544	0.0573638	0.923153
Tlr7	ENSRNOG00000004249	0.547761	-0.283834	0.851292	-2.95081	0.0431833	0.683518	0.654604	-1.98346	0.177447
Eif3h	ENSRNOG00000004252	67.9371	-0.37386	0.436963	-0.0938532	0.836269	-0.577311	0.220313	-0.297304	0.513894
Usf1	ENSRNOG00000004255	39.6152	-0.0925673	0.922703	-0.905538	0.268369	1.4206	0.132105	0.607625	0.502681
Ctps2	ENSRNOG00000004257	18.1565	-0.206459	0.73132	0.129086	0.825804	-0.879928	0.15033	-0.544382	0.344803
Dohh	ENSRNOG00000004259	18.5053	3.1483	0.019347	-0.827939	0.489184	1.32394	0.32656	-2.6523	0.0355043
AABR07065886.1	ENSRNOG00000004262	0.896109	-0.340684	0.739377	-1.26602	0.203743	0.292787	0.77888	-0.632546	0.516821
Ints7	ENSRNOG00000004263	11.0425	-1.23143	0.0418248	-0.262417	0.599991	0.00271859	0.995864	0.971727	0.0854892
Zfp386	ENSRNOG00000004268	1.80395	-1.96311	0.135633	-0.57582	0.622467	-0.389563	0.739026	0.997722	0.415651
Myt1l	ENSRNOG00000004269	13.8664	-0.612115	0.254838	0.201949	0.676621	-0.325421	0.52616	0.488643	0.335566
Itga3	ENSRNOG00000004276	2.36679	-1.35371	0.181774	-0.814372	0.327995	0.725883	0.41432	1.26522	0.187865
Adgra3	ENSRNOG00000004279	8.33465	0.381389	0.814574	-3.94777	0.00504003	4.42718	0.00557158	0.098019	0.948957
Cobl	ENSRNOG00000004281	48.2858	0.085004	0.785592	-0.0138989	0.960841	0.204165	0.512028	0.105262	0.722491
Arl4a	ENSRNOG00000004282	28.5134	0.131219	0.885204	0.0134183	0.989376	-2.67856	0.00616032	-2.79636	0.00346746
Camta2	ENSRNOG00000004283	30.2991	-1.00597	0.216458	0.131545	0.851338	-0.181471	0.811286	0.956048	0.215198
Btg1	ENSRNOG00000004284	36.4265	-0.252312	0.602357	0.169711	0.688457	0.291457	0.542555	0.713479	0.129915
Wdr83	ENSRNOG00000004287	5.53971	2.40096	0.0572484	-0.527326	0.628836	2.47566	0.0549685	-0.452625	0.691761
Ptrh2	ENSRNOG00000004288	15.029	0.00902528	0.98987	-0.0693682	0.918126	-0.379221	0.58948	-0.457614	0.500086
Grb10	ENSRNOG00000004290	27.0018	-0.636619	0.270741	-0.059833	0.909521	-0.314	0.568324	0.262787	0.627396
Cltc	ENSRNOG00000004291	150.187	-0.540647	0.0592584	-0.34734	0.198407	-0.668099	0.0173817	-0.474793	0.0791351
Sptssa	ENSRNOG00000004292	34.0032	0.0913463	0.88151	0.307436	0.608207	-0.742057	0.237812	-0.525967	0.370534
Ascl1	ENSRNOG00000004294	1.29704	1.84304	0.256946	0.567055	0.713258	0.923039	0.552724	-0.352945	0.816076
Gtf2a1	ENSRNOG00000004300	8.54167	0.471361	0.259062	-0.488842	0.210079	0.333241	0.417467	-0.626962	0.11929
Dcaf13	ENSRNOG00000004301	20.1642	0.706232	0.271699	0.111952	0.854949	-0.316606	0.623817	-0.910886	0.140287
Timp3	ENSRNOG00000004303	3.38749	-0.386123	0.736488	-0.383144	0.735958	-1.04479	0.350824	-1.04181	0.343532
Syap1	ENSRNOG00000004304	7.52026	-0.316244	0.660569	0.0223013	0.974303	-0.770773	0.275702	-0.432228	0.528285
Abl2	ENSRNOG00000004305	1.46461	-0.986544	0.459781	1.02109	0.413551	-1.03764	0.430981	0.969994	0.44385
Zbtb39	ENSRNOG00000004306	1.95702	0.386436	0.779917	-0.502944	0.698545	0.0967843	0.943706	-0.792596	0.547298
Tor3a	ENSRNOG00000004307	3.62972	0.744067	0.5394	-0.444866	0.713988	-0.601824	0.620981	-1.79076	0.128791
Tmbim4	ENSRNOG00000004312	29.0369	0.0185127	0.977988	0.99904	0.125908	-0.66446	0.3411	0.316068	0.620803
Ppm1h	ENSRNOG00000004314	4.56477	-0.12223	0.876172	1.28213	0.0697691	0.0141749	0.985899	1.41853	0.067659
Llph	ENSRNOG00000004316	0.818379	0.201224	0.847464	-0.0860688	0.931371	0.0287642	0.978057	-0.258529	0.794555
Tgm4	ENSRNOG00000004320	3.9878	0.199719	0.827992	0.227711	0.796433	-0.4291	0.641488	-0.401108	0.64624
Sh3kbp1	ENSRNOG00000004322	15.3351	-0.473155	0.360512	-0.579225	0.231033	0.00463255	0.992364	-0.101437	0.834776
Deptor	ENSRNOG00000004328	8.82914	-3.28254	0.124415	1.22744	0.529252	-4.1107	0.056956	0.399289	0.838861
Chrdl1	ENSRNOG00000004330	2.79221	-4.64856	0.00805031	-0.821152	0.597772	-1.26708	0.380445	2.56033	0.103625
Egfr	ENSRNOG00000004332	1.54568	-0.344834	0.831504	-0.0171877	0.990792	0.0898179	0.954797	0.417464	0.786036
Flywch1	ENSRNOG00000004333	106.25	0.118846	0.789791	-1.22959	0.00286035	1.86905	0.00026822	0.520615	0.223993
Fam20b	ENSRNOG00000004337	27.8774	0.618357	0.249149	0.062331	0.895122	0.578868	0.287001	0.0228421	0.963518
Yy1	ENSRNOG00000004339	10.5059	-1.83319	0.11126	1.44941	0.169509	-1.59984	0.143305	1.68277	0.122841
LOC498222	ENSRNOG00000004341	0.192679	-2.55582	0.0411801	0.368357	0.737474	-2.31701	0.0694376	0.607166	0.589814
Ahr	ENSRNOG00000004342	3.10635	-0.930348	0.225986	-0.116559	0.862709	-0.199666	0.778081	0.614123	0.395009
Zdhhc3	ENSRNOG00000004344	15.8277	-0.110028	0.868652	0.102519	0.863783	0.176971	0.789008	0.389518	0.538598
Daam1	ENSRNOG00000004345	14.7694	-0.545466	0.360643	0.752883	0.162724	-0.251462	0.667831	1.04689	0.073011
Slc25a29	ENSRNOG00000004351	1.26623	1.2246	0.20253	0.87142	0.314549	0.984175	0.31439	0.630998	0.481969
Ppfia2	ENSRNOG00000004353	19.8612	-1.14886	0.131445	0.109989	0.881627	-1.74534	0.0205943	-0.486483	0.490178
Wars	ENSRNOG00000004359	20.969	-0.341656	0.64687	0.485469	0.457913	0.14264	0.846132	0.969765	0.178724
Gemin2	ENSRNOG00000004360	2.91859	-0.873789	0.369404	-0.148636	0.86129	0.523294	0.575062	1.24845	0.181615
Rps6ka5	ENSRNOG00000004362	11.4068	0.316751	0.524904	0.602903	0.206831	-0.404923	0.426749	-0.118771	0.800723
Bre	ENSRNOG00000004364	26.6523	0.35891	0.567645	0.237669	0.676969	0.258786	0.684189	0.137545	0.81665
Elk3	ENSRNOG00000004367	0.63128	1.66241	0.163402	0.836906	0.455996	0.429333	0.713234	-0.396174	0.719683
Cbln4	ENSRNOG00000004372	1.01918	-0.674011	0.45608	-1.41891	0.10441	0.00136001	0.998735	-0.743539	0.387836
Ddx39a	ENSRNOG00000004373	5.29067	-0.418297	0.710612	-0.145584	0.879428	0.703553	0.517413	0.976266	0.364104
Lpin1	ENSRNOG00000004377	2.6445	-0.25484	0.885442	1.37789	0.410226	-1.0548	0.555215	0.577933	0.73087
Abca5	ENSRNOG00000004378	2.45541	-1.63893	0.23926	-0.908603	0.493729	-0.941833	0.444443	-0.211505	0.871238
Arel1	ENSRNOG00000004382	28.685	-0.998675	0.0932794	-0.551011	0.296757	-0.0759124	0.886326	0.371751	0.497321
Utp23	ENSRNOG00000004387	2.82296	-1.25347	0.400801	-0.617652	0.659856	0.0928967	0.949878	0.728711	0.604502
Aatk	ENSRNOG00000004392	46.0372	-0.379565	0.592447	-0.807956	0.220198	0.329583	0.618449	-0.0988083	0.883018
Fbxw11	ENSRNOG00000004395	12.2143	-0.345836	0.496792	0.641925	0.200572	-1.12247	0.0365963	-0.134711	0.779071
Dlx4	ENSRNOG00000004399	1.66464	0.698457	0.512107	0.877788	0.391774	-0.658677	0.543266	-0.479346	0.634438
Mrpl13	ENSRNOG00000004401	38.2012	-0.839681	0.155343	-0.134991	0.80186	-0.515024	0.350217	0.189666	0.728825
Lpgat1	ENSRNOG00000004402	6.03316	-0.898416	0.325232	0.632686	0.503074	-2.30461	0.0157005	-0.773504	0.368725
Slc25a32	ENSRNOG00000004403	26.2295	0.547958	0.326052	-0.885817	0.092264	0.760007	0.169437	-0.673767	0.206855
Tspan8	ENSRNOG00000004411	0.545445	-0.863968	0.488208	-0.257227	0.828823	-0.232827	0.853278	0.373914	0.750621
Fam179b	ENSRNOG00000004415	10.2672	-0.336899	0.485114	0.0605718	0.894935	-0.677754	0.158523	-0.280284	0.53991
Fam117a	ENSRNOG00000004417	1.25961	-1.50359	0.366235	-2.19804	0.161315	-0.946454	0.581173	-1.64091	0.300592
Rad21	ENSRNOG00000004420	23.5024	-0.425042	0.316188	0.0100376	0.979729	-0.48686	0.239372	-0.0517802	0.896261
Tmem5	ENSRNOG00000004421	4.26461	-1.02223	0.306815	-0.595472	0.493443	0.301114	0.740335	0.727869	0.44068
Zfp238	ENSRNOG00000004423	20.3125	-1.19898	0.300146	0.292297	0.799468	-1.88967	0.0933914	-0.398391	0.713045
Rabif	ENSRNOG00000004424	9.38434	0.766867	0.18431	-0.307419	0.526782	1.21586	0.04445	0.141572	0.790739
Klhdc1	ENSRNOG00000004425	6.38012	-0.284801	0.811831	0.937921	0.433929	-1.45901	0.237548	-0.236292	0.834886
Rps27a	ENSRNOG00000004426	212.195	1.08783	0.164234	0.568708	0.458406	-0.78485	0.329169	-1.30397	0.0832054
Cep131	ENSRNOG00000004430	1.75243	-0.88188	0.395971	0.184966	0.854673	-1.35985	0.182853	-0.293004	0.764301
Map2k6	ENSRNOG00000004437	23.2005	-0.214062	0.667645	0.123119	0.789592	-0.219087	0.655822	0.118094	0.802481
Cntn1	ENSRNOG00000004438	37.0939	-1.03167	0.268622	1.19852	0.203096	-2.21492	0.0238905	0.0152686	0.985978
E2f6	ENSRNOG00000004449	19.1855	0.8068	0.359334	0.122935	0.874303	0.565415	0.525849	-0.11845	0.8858
Ston2	ENSRNOG00000004458	1.67954	-1.45718	0.377077	1.73099	0.255746	0.751524	0.662159	3.9397	0.0185697
Sdr9c7	ENSRNOG00000004459	28.7886	-0.070384	0.850977	-0.121896	0.732254	-0.321295	0.386167	-0.372807	0.301089
Flywch2	ENSRNOG00000004461	1.40579	-1.27576	0.315466	-1.32717	0.279641	0.414561	0.748342	0.363146	0.760485
Sel1l	ENSRNOG00000004464	16.4999	-0.313943	0.439058	-0.0905111	0.815027	-0.599396	0.137198	-0.375964	0.331123
Polr3h	ENSRNOG00000004471	14.3003	-0.873788	0.203415	-0.21612	0.674691	1.25166	0.0551521	1.90933	0.00628271
Ppargc1a	ENSRNOG00000004473	1.83035	-0.533535	0.768302	-1.31231	0.435536	0.754187	0.67236	-0.0245889	0.988566
Klhdc2	ENSRNOG00000004474	129.8	0.051373	0.891697	-0.589142	0.106963	0.137249	0.707997	-0.503266	0.170598
Ublcp1	ENSRNOG00000004477	55.0085	-0.209246	0.63898	-0.132021	0.74537	0.108505	0.803455	0.185731	0.660469
Aurka	ENSRNOG00000004479	8.52819	-0.124576	0.896741	-1.21488	0.121934	1.94354	0.0393453	0.853238	0.350208
Adss	ENSRNOG00000004481	16.2531	0.318384	0.594086	-0.0550925	0.920857	-0.0213487	0.971263	-0.394825	0.487154
Ptprr	ENSRNOG00000004483	23.8554	-0.570512	0.346698	-0.631022	0.254145	0.260343	0.646941	0.199833	0.725748
LOC100910472	ENSRNOG00000004484	9.70285	-0.317304	0.647049	0.758375	0.190035	0.678383	0.327732	1.75406	0.0132718
Mterfd1	ENSRNOG00000004492	4.02471	-0.508221	0.582194	-0.401275	0.65183	-0.625735	0.476438	-0.518789	0.554625
Tasp1	ENSRNOG00000004493	11.7804	0.0465857	0.956258	-1.32008	0.101853	0.769275	0.341802	-0.597391	0.462311
Lta4h	ENSRNOG00000004494	16.1804	-0.331683	0.744211	0.555173	0.527708	0.340452	0.734018	1.22731	0.210593
Rock2	ENSRNOG00000004496	156.076	-0.33568	0.28727	-0.0247108	0.931213	-0.16821	0.580299	0.142759	0.629159
Gpr135	ENSRNOG00000004499	2.61493	-2.45996	0.0587111	-3.2559	0.010446	-1.24115	0.300669	-2.0371	0.0956023
Myc	ENSRNOG00000004500	3.11269	1.03635	0.500416	1.83094	0.192222	1.33871	0.392312	2.1333	0.152092
L3hypdh	ENSRNOG00000004503	5.38955	0.925968	0.342977	0.059273	0.936467	2.17769	0.0333635	1.31099	0.157539
Eapp	ENSRNOG00000004509	36.0256	0.130092	0.910944	-1.22243	0.201109	1.87467	0.0987605	0.522154	0.634373
Slc35b1	ENSRNOG00000004510	62.8637	-0.269926	0.629181	0.232319	0.624862	0.566485	0.30689	1.06873	0.0536799
Apool	ENSRNOG00000004512	0.729479	-0.161674	0.866369	-0.507827	0.583961	0.730911	0.451746	0.384758	0.673532
Pes1	ENSRNOG00000004515	7.11768	-0.141839	0.853093	-0.50422	0.47843	0.230419	0.755636	-0.131962	0.85594
Itgbl1	ENSRNOG00000004516	1.61854	-1.62122	0.193132	-0.328378	0.782334	-1.65999	0.165217	-0.367146	0.751049
Igf1	ENSRNOG00000004517	2.78466	-0.883471	0.533484	1.34978	0.341167	-2.43831	0.0932321	-0.205059	0.878202
Cacnb1	ENSRNOG00000004518	23.517	-0.824913	0.267033	-0.401818	0.540281	0.171681	0.803028	0.594776	0.395811
Atg2b	ENSRNOG00000004519	12.7709	-0.303102	0.641693	-0.212241	0.691626	1.15192	0.0767777	1.24278	0.0536872
Wdr60	ENSRNOG00000004520	2.23069	-0.751402	0.366955	-1.48489	0.0707519	0.0139115	0.985162	-0.719581	0.364725
Prpf39	ENSRNOG00000004521	4.44148	-1.5092	0.0730517	0.18745	0.804798	-1.08987	0.158845	0.606787	0.432223
Desi2	ENSRNOG00000004524	12.9722	-2.48628	0.0367865	-0.81679	0.434056	-0.94799	0.316419	0.721505	0.506589
Cox7a2l	ENSRNOG00000004526	115.983	-0.590558	0.117095	-0.19314	0.566293	-0.168558	0.630283	0.22886	0.510713
Lin7a	ENSRNOG00000004527	3.30843	-0.312623	0.7569	-0.00905656	0.99202	0.431508	0.662278	0.735074	0.4455
Fam69b	ENSRNOG00000004532	25.1046	-0.315445	0.609801	-0.865464	0.173036	-0.729608	0.211853	-1.27963	0.0390702
Spdya	ENSRNOG00000004534	8.82254	-0.471112	0.661293	-0.884064	0.37236	0.390226	0.702573	-0.0227255	0.982193
Kcng3	ENSRNOG00000004535	1.49575	0.876	0.568685	-1.97575	0.179165	2.02263	0.188021	-0.829119	0.569631
Rxrg	ENSRNOG00000004537	2.75909	0.296869	0.754583	-0.854113	0.342671	0.421431	0.648214	-0.72955	0.421706
Brd1	ENSRNOG00000004538	24.2868	2.01519	0.0131755	-0.163309	0.818327	0.612216	0.444269	-1.56628	0.0375922
Ttc8	ENSRNOG00000004542	67.8197	-1.57559	0.347988	1.99932	0.18789	-1.12044	0.48885	2.45447	0.130253
Ube2e3	ENSRNOG00000004544	85.0538	-0.126722	0.765485	-0.145615	0.721074	-0.44511	0.293518	-0.464003	0.257357
Dhx40	ENSRNOG00000004549	5.59736	0.760979	0.202324	0.182982	0.752531	-0.639144	0.292325	-1.21714	0.038189
Cox20	ENSRNOG00000004553	14.2555	-0.255578	0.705961	-0.052394	0.93326	-0.215837	0.743116	-0.012653	0.984264
Sec14l4	ENSRNOG00000004555	3.39547	0.14044	0.772846	-1.09001	0.0148691	1.34828	0.00843866	0.117828	0.797714
Dcaf5	ENSRNOG00000004556	11.7355	-0.317035	0.600254	-0.87843	0.146515	-0.351822	0.535812	-0.913217	0.122761
Cacna1b	ENSRNOG00000004560	24.1259	0.784305	0.431091	0.251255	0.796669	-0.607491	0.549575	-1.14054	0.232402
Sec24a	ENSRNOG00000004563	1.99826	0.369001	0.676509	-0.67972	0.380023	1.17302	0.187525	0.124302	0.881639
Arhgef15	ENSRNOG00000004566	1.04686	0.500791	0.678954	-2.79225	0.0164258	3.28477	0.00809127	-0.00827129	0.994242
RGD1563680	ENSRNOG00000004571	0.818958	0.612374	0.588825	-2.22458	0.042656	1.76317	0.1223	-1.07379	0.322178
Zfp472	ENSRNOG00000004572	1.78439	-0.709937	0.550955	0.513103	0.651428	-1.05385	0.37281	0.169193	0.880392
Ofd1	ENSRNOG00000004574	1.49319	0.861915	0.414474	-0.566376	0.553232	1.10613	0.297258	-0.322164	0.745767
Fez2	ENSRNOG00000004577	7.15924	-0.196569	0.852588	1.29298	0.190735	-0.558548	0.607761	0.931005	0.358722
Zdhhc9	ENSRNOG00000004581	33.5772	0.796952	0.427359	1.53264	0.133313	-1.24211	0.251026	-0.50643	0.593799
LOC100910429	ENSRNOG00000004588	3.3834	-0.0891406	0.928553	-0.131349	0.895833	-1.19621	0.231717	-1.23842	0.198294
Galnt16	ENSRNOG00000004589	76.3197	0.470206	0.319386	0.703597	0.0965211	0.41862	0.386278	0.652011	0.150674
Alg12	ENSRNOG00000004591	7.09979	0.268364	0.866876	-0.739611	0.619082	0.488028	0.75522	-0.519947	0.732416
Pou6f1	ENSRNOG00000004595	3.04612	-0.223722	0.903924	-1.14548	0.511805	-0.0324846	0.986096	-0.95424	0.588724
Tsen54	ENSRNOG00000004598	17.5719	-0.394076	0.767169	1.37324	0.261918	-0.581605	0.665741	1.18571	0.352378
Rnf145	ENSRNOG00000004602	35.6034	-0.36147	0.426766	0.0609246	0.887021	-0.573346	0.203552	-0.150951	0.724719
Srgap1	ENSRNOG00000004603	1.80818	1.04184	0.578961	-1.5616	0.372504	0.700515	0.70653	-1.90293	0.290554
Slc38a10	ENSRNOG00000004604	2.05985	-0.130852	0.880096	0.820401	0.315024	-0.510944	0.56153	0.440309	0.593873
Pam16	ENSRNOG00000004608	292.24	-0.00193052	0.997351	-0.768481	0.149384	0.777486	0.175847	0.0109357	0.98417
Ppp1cb	ENSRNOG00000004612	129.095	-0.0143139	0.949445	-0.0886567	0.680276	-0.331173	0.148349	-0.405516	0.0702595
Gpm6b	ENSRNOG00000004613	17.4434	0.00104002	0.998077	-0.444488	0.260699	0.420931	0.323179	-0.0245976	0.952056
Npm1	ENSRNOG00000004616	16.4875	0.0998565	0.839842	0.40242	0.385483	-0.303432	0.542538	-0.000868799	0.99852
Rtn4	ENSRNOG00000004621	45.9953	-0.103759	0.755179	-0.346029	0.279526	-0.23037	0.47851	-0.47264	0.145434
Rnd3	ENSRNOG00000004624	15.7265	-0.104715	0.916571	-0.288888	0.780039	-1.26323	0.200035	-1.44741	0.137204
Dazap2	ENSRNOG00000004628	22.3609	-0.425102	0.591534	0.0955538	0.894688	-0.200345	0.793213	0.320311	0.669512
Fkbp3	ENSRNOG00000004629	91.7916	-0.218375	0.584838	0.0604923	0.874166	-0.609269	0.131015	-0.330402	0.386546
Fbxo7	ENSRNOG00000004637	25.9623	-1.58713	0.186659	0.42078	0.669062	-0.298353	0.780427	1.70955	0.135662
Traf6	ENSRNOG00000004639	2.94877	-0.770981	0.492102	-0.0254166	0.978989	0.528412	0.619289	1.27398	0.236446
Mtfp1	ENSRNOG00000004640	45.3391	0.875549	0.29792	0.599079	0.441482	-0.0549259	0.949535	-0.331396	0.674497
Sstr4	ENSRNOG00000004641	14.2284	-1.03709	0.577722	0.351124	0.838167	-0.937101	0.591963	0.451114	0.798228
Begain	ENSRNOG00000004650	122.118	-0.276431	0.746821	0.0186943	0.97979	0.581583	0.489744	0.876708	0.285687
Sec23a	ENSRNOG00000004657	5.07778	-0.998075	0.277668	-0.321866	0.722071	-1.4226	0.10227	-0.746395	0.390013
Creld2	ENSRNOG00000004659	7.45659	-1.41869	0.226446	-1.20562	0.256799	0.0833091	0.93437	0.296373	0.787534
Fzd6	ENSRNOG00000004660	1.35446	-1.29579	0.116799	-1.36586	0.0798225	-0.123616	0.862912	-0.193692	0.799633
RGD1560687	ENSRNOG00000004662	0.434762	-0.811117	0.433191	-1.21013	0.233302	0.638362	0.548033	0.239344	0.806036
Slc25a35	ENSRNOG00000004668	1.59652	-2.8238	0.0722878	-1.28651	0.363882	-1.7314	0.282814	-0.19411	0.891926
Ddx56	ENSRNOG00000004670	2.57478	0.972974	0.319301	-0.395004	0.65406	0.927426	0.345342	-0.440552	0.630834
Sec14l2	ENSRNOG00000004672	42.5799	1.0081	0.0863785	0.409598	0.412888	0.772391	0.200406	0.173885	0.745574
Rbm43	ENSRNOG00000004673	1.83407	-0.319847	0.842759	0.315429	0.833393	-2.05084	0.210073	-1.41556	0.359886
Pak3	ENSRNOG00000004676	143.113	-0.112211	0.850053	-0.148917	0.783186	0.168185	0.773303	0.131479	0.815328
Zeb2	ENSRNOG00000004677	30.2313	0.614541	0.537759	-1.18018	0.192677	1.37763	0.167958	-0.417088	0.658101
Fign	ENSRNOG00000004679	0.655264	-3.39453	0.0101854	0.202344	0.865201	-1.85238	0.135575	1.7445	0.138379
Kif5c	ENSRNOG00000004680	120.045	-0.461291	0.263442	0.452369	0.248341	-0.807152	0.0554437	0.106509	0.782145
Eny2	ENSRNOG00000004681	8.67659	0.810285	0.429133	-0.737841	0.473366	-0.40076	0.689952	-1.94889	0.0542773
Mta3	ENSRNOG00000004685	13.0139	-1.39455	0.17705	-1.29096	0.138108	0.739609	0.402855	0.843206	0.384214
Spop	ENSRNOG00000004686	98.418	-0.107866	0.803536	-0.611594	0.124138	0.614951	0.150111	0.111223	0.78672
Thbd	ENSRNOG00000004687	2.47802	-0.909798	0.491225	1.72288	0.193655	-4.07563	0.00406744	-1.44295	0.255119
Rbfox2	ENSRNOG00000004688	49.5679	0.194891	0.640451	0.321801	0.375954	0.623898	0.146639	0.750808	0.0682202
Pbx1	ENSRNOG00000004693	8.54434	-0.27414	0.747171	-1.38925	0.106204	-0.0893052	0.908564	-1.20441	0.147655
Celf5	ENSRNOG00000004695	98.2182	-0.422113	0.232273	0.132911	0.68287	-0.493529	0.156479	0.0614951	0.851738
Arhgap5	ENSRNOG00000004696	14.263	0.0402257	0.927126	-0.803693	0.0640091	0.175259	0.67911	-0.66866	0.121184
Baalc	ENSRNOG00000004697	48.9485	-0.00376393	0.992823	-0.79266	0.0591183	-0.045262	0.910238	-0.834158	0.0467575
Nxt1	ENSRNOG00000004700	2.99638	-1.77067	0.0839268	-1.53861	0.107166	0.0520536	0.956412	0.284108	0.761144
Aard	ENSRNOG00000004708	0.646941	0.137143	0.902887	-0.121753	0.901999	-2.49594	0.0356149	-2.75483	0.0167304
Foxn3	ENSRNOG00000004709	8.62104	-0.275273	0.688525	-0.611134	0.35718	-0.135478	0.834791	-0.47134	0.472172
Rbks	ENSRNOG00000004710	2.99374	-1.15305	0.402756	-3.10603	0.0183196	1.42644	0.291586	-0.526538	0.684623
Mta1	ENSRNOG00000004711	42.6689	-0.0400188	0.932805	-0.712665	0.113862	0.434472	0.347996	-0.238174	0.598266
Pp2d1	ENSRNOG00000004719	3.80638	0.0656953	0.931762	0.206659	0.772172	-0.138474	0.856273	0.00249014	0.997269
Kcnj2	ENSRNOG00000004720	0.875896	0.579916	0.675624	-0.316848	0.806674	-0.462656	0.737575	-1.35942	0.306822
Fcf1	ENSRNOG00000004723	48.9475	0.820523	0.159267	-0.619975	0.250173	0.598869	0.297704	-0.84163	0.129662
Mapkapk2	ENSRNOG00000004726	18.0443	-1.94852	0.053625	0.442376	0.606361	-1.11471	0.213861	1.27618	0.172569
Nup37	ENSRNOG00000004727	2.26245	-0.114246	0.911185	-0.875052	0.389666	-0.663418	0.506811	-1.42422	0.153818
Meis2	ENSRNOG00000004730	43.2333	-0.487939	0.239586	-0.0508851	0.895624	-0.623499	0.123995	-0.186446	0.630654
Ano3	ENSRNOG00000004731	23.3469	-0.0378041	0.903421	-0.35695	0.243364	-0.365856	0.23707	-0.685002	0.0298782
Wdr25	ENSRNOG00000004733	0.567401	-1.87699	0.153249	-1.07982	0.362626	-2.21871	0.104391	-1.42155	0.249633
Gzf1	ENSRNOG00000004735	2.87274	-0.0487913	0.950124	0.298895	0.67576	-0.171012	0.82485	0.176674	0.811332
Ralgps2	ENSRNOG00000004736	1.89029	-0.979626	0.318915	-0.388642	0.664009	-0.181258	0.843412	0.409726	0.657297
Cd48	ENSRNOG00000004737	1.53791	0.592386	0.670341	-1.15754	0.375859	-0.443986	0.751975	-2.19391	0.107794
Mmadhc	ENSRNOG00000004740	16.4368	0.177256	0.79616	-0.0692698	0.911739	0.19791	0.77109	-0.048616	0.940381
Rpl19	ENSRNOG00000004741	190.768	-0.357727	0.521061	0.115391	0.821169	-0.242481	0.656718	0.230637	0.661744
Chp1	ENSRNOG00000004742	60.4623	0.0233728	0.967045	0.963384	0.071951	-0.248445	0.667359	0.691566	0.207002
Slc30a1	ENSRNOG00000004749	1.31375	0.164867	0.896048	-0.588192	0.617261	0.394336	0.750137	-0.358723	0.764667
Jkamp	ENSRNOG00000004751	23.5757	1.40444	0.0436895	-0.15625	0.794713	0.700896	0.313597	-0.859791	0.179376
Nalcn	ENSRNOG00000004752	8.81637	-0.0854597	0.897658	-1.01994	0.143246	-0.779985	0.218424	-1.71446	0.0125482
Napb	ENSRNOG00000004753	11.1141	-0.462517	0.711515	0.708476	0.576651	-1.91765	0.130344	-0.746653	0.529739
Commd9	ENSRNOG00000004755	25.1852	-0.377722	0.607496	1.21898	0.0980353	-1.19686	0.123586	0.399846	0.566961
Tmem158	ENSRNOG00000004757	3.77053	-2.00596	0.235068	-1.54834	0.330081	0.238662	0.885888	0.696272	0.658722
Lars2	ENSRNOG00000004760	1.66142	0.4641	0.762024	-2.22759	0.13379	0.471573	0.752085	-2.22011	0.138023
Sirpa	ENSRNOG00000004763	126.178	0.214258	0.69382	0.0396611	0.939547	-0.507921	0.352169	-0.682517	0.195356
Glis2	ENSRNOG00000004766	1.95371	-1.59057	0.376556	-1.66596	0.301356	1.50339	0.376552	1.428	0.402219
Yaf2	ENSRNOG00000004773	25.5999	-0.196512	0.660526	0.089587	0.834972	-0.676615	0.135424	-0.390517	0.361753
Ccdc175	ENSRNOG00000004774	14.0394	0.606382	0.389932	-0.456576	0.525742	-0.748241	0.285462	-1.8112	0.0119855
Cstf1	ENSRNOG00000004775	24.7492	-0.762064	0.250018	0.490539	0.354622	0.622541	0.321801	1.87514	0.0058627
Ftsj1	ENSRNOG00000004776	2.94422	0.551114	0.666823	0.378208	0.739097	1.0185	0.430337	0.845598	0.487249
Esf1	ENSRNOG00000004777	3.92252	0.988723	0.211755	-0.473513	0.530546	0.169832	0.827324	-1.2924	0.0909396
Crmp1	ENSRNOG00000004781	89.064	0.514935	0.351517	-0.178141	0.73638	-0.164428	0.766539	-0.857504	0.110009
Fam171b	ENSRNOG00000004783	37.7233	-0.506394	0.415963	0.323027	0.584301	-0.866707	0.16099	-0.0372865	0.949225
Ndufaf5	ENSRNOG00000004784	41.5132	-0.204897	0.855844	-0.969368	0.342	0.600733	0.568262	-0.163738	0.878506
AABR07053185.1	ENSRNOG00000004787	6.44415	1.42292	0.149766	0.544096	0.532598	0.874218	0.392118	-0.00460936	0.995966
Diexf	ENSRNOG00000004789	9.68245	0.460019	0.445039	-0.775201	0.150668	1.03357	0.0897021	-0.201645	0.721956
Arf6	ENSRNOG00000004791	22.7926	0.253859	0.752706	0.113134	0.87463	0.326306	0.686327	0.185581	0.807768
Ncln	ENSRNOG00000004793	10.1354	-0.553335	0.615889	2.67246	0.0246476	-2.48808	0.0465822	0.737716	0.482887
Rtn1	ENSRNOG00000004794	671.128	0.25634	0.374901	-0.10409	0.683865	0.478503	0.105147	0.118073	0.663573
Stac2	ENSRNOG00000004805	15.3641	-1.26887	0.329847	-0.538823	0.692048	-2.14385	0.0768438	-1.4138	0.253822
Strn	ENSRNOG00000004806	2.75911	-1.21905	0.445117	1.77404	0.243941	-1.79044	0.267329	1.20266	0.427449
Arf2	ENSRNOG00000004807	66.6612	-0.0573641	0.928544	-0.281591	0.648953	-0.428909	0.496076	-0.653136	0.289148
Plcb1	ENSRNOG00000004810	53.1999	0.215678	0.746234	-0.324228	0.63154	-1.00154	0.136732	-1.54145	0.0227678
Sema6d	ENSRNOG00000004812	5.20928	-1.05882	0.15181	-1.4399	0.0424731	0.14379	0.819965	-0.237289	0.730209
Rtcb	ENSRNOG00000004813	52.8929	-0.594182	0.291448	-0.772125	0.151629	-0.202927	0.695588	-0.380871	0.473468
Tceb2	ENSRNOG00000004814	25.3546	0.535956	0.416711	-0.31493	0.588925	0.799841	0.230054	-0.0510453	0.934326
Porcn	ENSRNOG00000004819	12.0553	-1.08266	0.118754	-0.561006	0.389749	-0.808649	0.20078	-0.286991	0.654239
Sar1b	ENSRNOG00000004820	30.9647	-0.892192	0.179826	-0.151169	0.795502	-0.141255	0.818209	0.599768	0.336263
Dock4	ENSRNOG00000004823	10.8936	-1.41431	0.179284	0.351666	0.737347	-2.15596	0.0377129	-0.389983	0.68933
Sos2	ENSRNOG00000004826	30.1354	-0.829805	0.0537985	0.470025	0.215601	-0.501112	0.215641	0.798718	0.050657
Papola	ENSRNOG00000004827	22.136	-0.176706	0.688961	-0.472135	0.243009	0.374185	0.382678	0.0787558	0.85054
Acvr1c	ENSRNOG00000004828	11.1414	-0.657654	0.352843	-0.111575	0.857505	0.129959	0.846423	0.676037	0.314619
Immp1l	ENSRNOG00000004829	17.5169	1.85927	0.00687117	-0.390204	0.477309	1.45634	0.0367544	-0.793132	0.188532
Arid2	ENSRNOG00000004831	7.1968	-1.08362	0.114608	-0.0846128	0.887575	-0.338942	0.584383	0.660066	0.302334
B4galnt1	ENSRNOG00000004839	6.31488	0.639605	0.383371	0.368769	0.561949	0.642863	0.392681	0.372027	0.589802
Akap6	ENSRNOG00000004841	18.0034	-1.36902	0.0774336	-0.0663096	0.924315	-1.05598	0.135721	0.246727	0.727537
Dnajc24	ENSRNOG00000004842	8.23606	0.333413	0.65456	0.748508	0.282551	-0.163109	0.831361	0.251986	0.721286
Med30	ENSRNOG00000004844	10.439	0.124356	0.862424	0.554347	0.419109	-0.615164	0.403174	-0.185172	0.785781
Atp6v1c1	ENSRNOG00000004846	421.544	0.835343	0.0296119	-0.426777	0.228879	0.0637914	0.860489	-1.19833	0.00210959
L2hgdh	ENSRNOG00000004857	2.21958	-0.630417	0.54888	0.0119877	0.990919	-1.55705	0.137252	-0.914649	0.361699
Mpped2	ENSRNOG00000004863	51.2069	0.605514	0.143358	0.195611	0.604836	0.0060434	0.98828	-0.40386	0.29671
Prpf40a	ENSRNOG00000004864	3.81975	-0.1098	0.856422	0.236416	0.698202	-1.20355	0.0561194	-0.85733	0.147081
Dyrk3	ENSRNOG00000004870	9.60184	-0.628513	0.337687	0.322819	0.584053	-0.285183	0.652499	0.666149	0.285321
Flrt3	ENSRNOG00000004874	22.0469	0.362143	0.379691	-0.781875	0.0423695	0.93541	0.0280727	-0.208607	0.590867
Erh	ENSRNOG00000004883	206.653	0.0132787	0.981575	0.723722	0.181745	-0.309102	0.597246	0.401341	0.464958
Spred2	ENSRNOG00000004888	1.24923	-1.50452	0.319115	-0.477788	0.735874	-1.49191	0.32472	-0.465181	0.742444
Vangl2	ENSRNOG00000004889	3.15623	0.272581	0.834564	-0.823883	0.488293	0.743803	0.559772	-0.352662	0.775773
Adcy8	ENSRNOG00000004890	7.06499	0.398625	0.522052	-1.39614	0.0314645	0.220267	0.706747	-1.5745	0.0138317
Arl14ep	ENSRNOG00000004891	3.34205	1.51231	0.109254	-1.1951	0.1765	0.973678	0.294046	-1.73373	0.0565436
Atp5s	ENSRNOG00000004893	6.7458	-0.575255	0.524811	0.578815	0.503021	-0.98776	0.27268	0.166311	0.845593
Kcns3	ENSRNOG00000004899	11.3155	-0.576459	0.529912	-1.68201	0.0466388	1.12988	0.175464	0.0243245	0.977679
Crhr1	ENSRNOG00000004900	3.061	-1.74335	0.32093	1.07289	0.519167	-1.49451	0.397151	1.32173	0.425464
Slc4a1ap	ENSRNOG00000004901	9.94745	0.143159	0.801258	-0.659248	0.214342	0.434737	0.436199	-0.367671	0.497805
Ebp	ENSRNOG00000004903	13.1508	0.912239	0.575737	1.77839	0.192991	0.929636	0.588108	1.79579	0.249628
Pa2g4	ENSRNOG00000004904	32.0265	-0.679481	0.338813	0.189651	0.779419	-0.861126	0.213722	0.00800508	0.990409
Smc6	ENSRNOG00000004908	12.1	-0.436604	0.603495	-0.290747	0.70911	-0.240469	0.766594	-0.0946118	0.905278
Cnot2	ENSRNOG00000004909	13.6869	-0.806267	0.296525	0.27482	0.693784	-0.548955	0.456779	0.532131	0.464431
Eif2d	ENSRNOG00000004910	21.0672	0.932375	0.387611	0.354352	0.639842	2.3701	0.0400996	1.79208	0.0824035
Itgav	ENSRNOG00000004912	2.64016	-1.56829	0.264509	0.270273	0.838731	-1.51766	0.250152	0.320908	0.807177
Rasal2	ENSRNOG00000004917	15.9619	0.0355195	0.935811	-0.802168	0.0540444	0.697296	0.110629	-0.140392	0.737505
Kcna4	ENSRNOG00000004918	7.50108	-0.814666	0.238421	0.283474	0.650683	-0.645572	0.328002	0.452568	0.484821
Nusap1	ENSRNOG00000004921	4.811	0.174312	0.777544	-0.6694	0.273081	-0.273164	0.64746	-1.11688	0.0680663
Map4k5	ENSRNOG00000004923	8.265	-0.486899	0.506665	-0.254933	0.705199	-0.140267	0.839372	0.0916986	0.89464
Ppp1r12a	ENSRNOG00000004925	28.6319	-0.215088	0.521093	0.258419	0.40752	-0.322535	0.335354	0.150973	0.634051
Mettl15	ENSRNOG00000004926	2.89162	-0.353095	0.686504	0.617239	0.464797	-0.979632	0.268688	-0.00929758	0.991042
Supt7l	ENSRNOG00000004927	5.34608	-0.954557	0.364753	-1.37593	0.188027	-0.622243	0.506959	-1.04362	0.300568
Sntg2	ENSRNOG00000004928	1.83187	0.12214	0.915527	1.09874	0.321041	-0.924114	0.433775	0.052481	0.961685
Sel1l3	ENSRNOG00000004932	9.26466	0.0778536	0.923313	-0.971127	0.232191	-0.189453	0.803316	-1.23843	0.118842
Sdc2	ENSRNOG00000004936	23.875	0.576622	0.380307	-1.15969	0.0681486	0.791386	0.219513	-0.944931	0.137424
Csmd3	ENSRNOG00000004937	1.76683	-1.29496	0.100466	-0.0149943	0.98366	-1.18883	0.104729	0.0911366	0.899669
Rnf215	ENSRNOG00000004940	12.9559	0.950064	0.295435	1.03413	0.202459	0.381747	0.689191	0.46581	0.584891
Gpn1	ENSRNOG00000004941	9.60882	0.36318	0.734281	-0.622587	0.465367	1.8343	0.0894679	0.848537	0.401934
LOC100364912	ENSRNOG00000004947	4.93063	-2.6848	0.054373	0.985674	0.436065	-2.01874	0.111692	1.65173	0.200673
Kif16b	ENSRNOG00000004951	1.83545	-1.25909	0.177733	1.42633	0.116021	-1.86736	0.0483991	0.818058	0.349806
Jade2	ENSRNOG00000004956	1.9343	-2.64364	0.0225335	3.91388	0.000602228	-0.909751	0.443528	5.64777	2.2736e-05
Actr2	ENSRNOG00000004959	2287.48	-0.106998	0.631483	0.0253225	0.900672	0.00962611	0.964925	0.141947	0.503432
Prdm4	ENSRNOG00000004962	2.83603	-0.904696	0.510139	-1.24889	0.328099	0.0379197	0.976055	-0.306278	0.813753
Erbb3	ENSRNOG00000004964	0.533452	-1.8393	0.251071	-3.61506	0.0188484	0.964862	0.545747	-0.810901	0.588297
Snrpb2	ENSRNOG00000004967	24.6261	-0.216908	0.629639	0.41382	0.315966	-0.204729	0.646644	0.425999	0.322642
Txlng	ENSRNOG00000004971	15.7928	0.854712	0.51709	-0.492166	0.712911	-0.692402	0.595631	-2.03928	0.112465
Ppp2r5c	ENSRNOG00000004973	62.2163	-0.383081	0.495435	0.305265	0.541608	0.114147	0.835549	0.802493	0.140806
Prkacb	ENSRNOG00000004978	12.1582	-1.74508	0.101318	0.409048	0.69121	-2.17196	0.0330784	-0.0178312	0.985409
Rangrf	ENSRNOG00000004980	18.3818	-1.07405	0.329915	1.91349	0.0972079	-2.76502	0.0205079	0.222522	0.82903
Rab1a	ENSRNOG00000004992	84.1194	-0.123966	0.740026	0.0540434	0.876073	-0.15949	0.666066	0.0185185	0.958264
Zcrb1	ENSRNOG00000004996	20.706	0.546896	0.498469	-0.367732	0.636159	-0.090367	0.909329	-1.00499	0.197087
Jakmip1	ENSRNOG00000004998	33.2316	-0.389776	0.443815	-0.120288	0.79791	-0.257847	0.599644	0.0116413	0.98062
Ptprn2	ENSRNOG00000005003	61.4174	-0.293427	0.535537	-0.0302213	0.944535	-0.145806	0.750546	0.1174	0.793015
Ndufaf1	ENSRNOG00000005006	2.45057	0.511296	0.519719	0.162353	0.819522	0.540633	0.499016	0.19169	0.798031
Scn3a	ENSRNOG00000005007	12.4906	-0.91708	0.0552243	-0.033012	0.939211	-0.853449	0.0590991	0.0306184	0.943524
Zfp3	ENSRNOG00000005009	1.36465	-0.3052	0.855992	-0.781084	0.622987	0.313822	0.851382	-0.162062	0.919066
Utp14a	ENSRNOG00000005012	10.4427	0.169251	0.874984	-1.25103	0.184849	1.43921	0.175728	0.0189284	0.985148
Rabep1	ENSRNOG00000005015	14.3056	-0.665444	0.201834	0.457533	0.34101	-0.693722	0.173995	0.429255	0.379977
Tmed4	ENSRNOG00000005016	53.7943	-0.192732	0.60231	0.136937	0.688161	-0.173361	0.635432	0.156307	0.655592
Scn2a	ENSRNOG00000005018	94.4917	-0.899072	0.0195445	0.0608489	0.85365	-0.534534	0.126248	0.425386	0.219157
Orc4	ENSRNOG00000005021	7.18156	0.161848	0.836643	0.718694	0.38646	-1.94257	0.0232104	-1.38572	0.0732766
Cdkn2aipnl	ENSRNOG00000005024	49.6339	0.0571983	0.930873	-1.30824	0.0360001	1.0895	0.0942276	-0.275939	0.659825
Surf6	ENSRNOG00000005031	36.4345	-0.784705	0.262669	1.00653	0.130847	-1.09829	0.120244	0.692948	0.29603
Acvr1	ENSRNOG00000005033	16.4984	1.01597	0.176042	0.183687	0.796484	-0.220983	0.770155	-1.05327	0.141187
Arhgef25	ENSRNOG00000005034	18.8818	-0.907766	0.186355	0.264787	0.652875	0.00548606	0.993117	1.17804	0.0758928
Tfpi	ENSRNOG00000005039	12.1357	-0.032536	0.955059	-0.915213	0.106884	0.16991	0.75768	-0.712767	0.203542
Crip2	ENSRNOG00000005041	301.192	0.282466	0.631247	0.515796	0.362737	-0.477443	0.429014	-0.244114	0.661836
Ranbp17	ENSRNOG00000005042	0.929703	0.630374	0.646009	0.421531	0.733394	0.85265	0.537854	0.643807	0.620788
Cpeb2	ENSRNOG00000005043	2.47294	0.62597	0.523978	-0.680585	0.496636	-0.898416	0.359326	-2.20497	0.0259171
Ppp2r5e	ENSRNOG00000005045	36.2604	0.217388	0.598634	-0.301862	0.436635	0.0720712	0.858772	-0.447179	0.260164
Tspan13	ENSRNOG00000005046	169.996	0.15256	0.716939	-0.344406	0.38474	0.0786982	0.849045	-0.418267	0.300917
Tbr1	ENSRNOG00000005049	4.59536	2.53028	0.120694	-1.20372	0.42456	1.83926	0.262288	-1.89475	0.21521
Slc39a9	ENSRNOG00000005052	34.3861	-0.379226	0.449723	-0.407375	0.373817	0.16117	0.736072	0.133021	0.778484
Egln3	ENSRNOG00000005053	14.594	-0.452901	0.438586	1.07296	0.0565928	-0.682961	0.252651	0.842898	0.137057
Prox2	ENSRNOG00000005054	0.402189	-0.581068	0.600486	-2.60944	0.025691	2.17107	0.0704734	0.14269	0.891803
Lpcat4	ENSRNOG00000005058	12.7136	0.523458	0.51879	-0.258124	0.722976	0.596213	0.462959	-0.185368	0.808567
Dlst	ENSRNOG00000005061	40.1289	0.671503	0.372482	1.44325	0.0468969	-0.34582	0.66397	0.425926	0.549471
Atl1	ENSRNOG00000005063	47.6003	0.02539	0.955431	-0.12831	0.770499	-0.514529	0.257736	-0.668229	0.132711
Ube2b	ENSRNOG00000005064	131.591	0.419844	0.3945	0.673407	0.150815	-0.311521	0.537359	-0.0579579	0.900481
LOC100911319	ENSRNOG00000005067	12.5567	0.615322	0.236329	-0.0221434	0.961831	0.37173	0.475035	-0.265736	0.583961
Spopl	ENSRNOG00000005070	2.88165	1.11534	0.481583	0.894226	0.555548	-0.406009	0.798835	-0.627122	0.675281
Bcorl1	ENSRNOG00000005076	5.36806	-0.481096	0.677554	0.137351	0.893578	0.0762677	0.946089	0.694715	0.52747
Fbxl20	ENSRNOG00000005081	13.6243	0.0656129	0.930112	-0.0597106	0.928915	0.33409	0.650912	0.208767	0.768596
Irf6	ENSRNOG00000005082	0.586176	-0.926236	0.514664	0.300408	0.806875	-3.82257	0.0133502	-2.59592	0.0639433
Rtfdc1	ENSRNOG00000005083	14.0941	-2.1002	0.0703863	0.354519	0.707944	-0.590879	0.555666	1.86384	0.0890736
Cebpz	ENSRNOG00000005087	4.40282	-0.815223	0.200113	-1.36139	0.0325275	-0.151424	0.785034	-0.697587	0.248852
Bzw2	ENSRNOG00000005096	26.8479	0.171721	0.710134	-0.178147	0.67704	0.169102	0.713375	-0.180766	0.680085
Top3a	ENSRNOG00000005099	0.571786	0.864206	0.552103	-1.7846	0.225239	3.05497	0.0473522	0.406166	0.76724
Ctage5	ENSRNOG00000005101	11.8441	0.0984578	0.930315	1.91106	0.101056	-1.84193	0.134606	-0.0293299	0.97811
Ccdc53	ENSRNOG00000005102	29.7135	0.0725219	0.940034	0.831509	0.376033	-0.896142	0.362757	-0.137155	0.880809
Recql5	ENSRNOG00000005107	8.03668	0.0613216	0.966744	1.89131	0.151226	-0.10222	0.94753	1.72777	0.224458
Wfs1	ENSRNOG00000005108	49.2572	-0.047053	0.912443	0.386052	0.335527	-0.208789	0.628191	0.224316	0.581959
Rprm	ENSRNOG00000005109	4.93691	0.296815	0.734955	0.241367	0.758887	0.447642	0.613096	0.392194	0.637344
Nutm1	ENSRNOG00000005111	1.68144	-2.50419	0.167655	-0.913621	0.589217	-2.55836	0.160394	-0.96779	0.56578
Tmem74	ENSRNOG00000005114	28.0592	0.459692	0.497528	-0.293394	0.627456	0.60566	0.375812	-0.147426	0.817385
Emc2	ENSRNOG00000005123	25.4802	0.184577	0.76107	0.170768	0.772548	-0.596997	0.332271	-0.610806	0.295253
Plekhh2	ENSRNOG00000005124	1.81071	1.51688	0.392046	1.35468	0.412857	0.298767	0.871218	0.136564	0.934708
Pqlc3	ENSRNOG00000005126	0.970221	0.478131	0.75096	-1.1772	0.407492	0.0918129	0.951609	-1.56352	0.280864
Dtx3	ENSRNOG00000005129	26.1068	-0.807784	0.202421	0.0117783	0.98274	0.110136	0.851756	0.929698	0.125334
Ogdh	ENSRNOG00000005130	19.0452	-0.366168	0.584875	0.408512	0.531077	-0.978858	0.150538	-0.204178	0.747447
Mapt	ENSRNOG00000005133	156.416	-0.422159	0.156976	0.000124483	0.999611	0.249108	0.380328	0.671391	0.0229574
RGD1562161	ENSRNOG00000005135	1.5936	-0.399479	0.686504	0.184325	0.842885	-0.518097	0.595147	0.0657072	0.9441
Pip4k2c	ENSRNOG00000005138	27.1654	-0.154835	0.76621	-0.230242	0.628447	0.199769	0.695443	0.124361	0.801097
Hus1	ENSRNOG00000005141	6.50321	0.911516	0.208238	-0.342101	0.594068	0.750185	0.305131	-0.503431	0.457104
Tmem18	ENSRNOG00000005144	5.26639	0.895995	0.231204	-0.332277	0.629694	0.376445	0.612217	-0.851828	0.23023
Sacm1l	ENSRNOG00000005149	16.5278	0.0371215	0.928566	-0.171718	0.656958	-0.0214855	0.958096	-0.230325	0.559398
Dync2li1	ENSRNOG00000005151	26.6334	0.688888	0.258284	-0.763491	0.205734	-0.0236038	0.967902	-1.47598	0.0164003
LOC690422	ENSRNOG00000005153	2.52723	-0.723795	0.315313	0.288842	0.662764	-0.626383	0.369972	0.386254	0.568696
Rbbp7	ENSRNOG00000005157	128.165	0.291852	0.444022	0.00704338	0.984706	-0.510239	0.18761	-0.795048	0.0368811
Slc24a5	ENSRNOG00000005158	15.6983	0.472021	0.323914	0.00288622	0.994917	-0.261844	0.584647	-0.730979	0.114754
Fam135b	ENSRNOG00000005159	6.69991	-3.02499	0.0857427	1.25675	0.45073	-3.24048	0.0448521	1.04125	0.520507
Tmem121	ENSRNOG00000005174	2.68098	-1.57244	0.17973	-0.288298	0.793985	-1.73289	0.132662	-0.448741	0.679931
Sgpp1	ENSRNOG00000005175	7.9563	-0.220384	0.719197	0.00663021	0.991079	-0.601969	0.325761	-0.374955	0.520609
Map7d2	ENSRNOG00000005176	38.1346	-0.173386	0.660967	-0.124328	0.742158	-0.454102	0.248549	-0.405044	0.286411
Tp53i3	ENSRNOG00000005177	1.30872	-4.28314	0.00293883	0.842179	0.504502	-3.32515	0.0159937	1.80017	0.14692
Vstm2a	ENSRNOG00000005180	55.7457	-1.62795	0.0861128	-0.321069	0.701437	-0.793574	0.340917	0.51331	0.556284
Rtf1	ENSRNOG00000005183	62.3855	-1.01205	0.074219	-0.240036	0.606138	0.378355	0.458994	1.15037	0.0351866
Nop10	ENSRNOG00000005184	74.0076	0.214763	0.694781	0.00174875	0.997248	0.0636775	0.907329	-0.149337	0.773397
Nxph3	ENSRNOG00000005185	4.87642	-1.25668	0.435556	1.91732	0.204624	-0.83125	0.614875	2.34275	0.134141
Nipal2	ENSRNOG00000005190	3.18138	0.568471	0.579629	-2.03863	0.0367491	1.55993	0.117614	-1.04717	0.287771
Trim44	ENSRNOG00000005191	2.28442	-2.48972	0.0856276	2.01109	0.146641	-3.33687	0.0212589	1.16393	0.382877
Pfas	ENSRNOG00000005193	7.25158	0.573823	0.299959	0.399949	0.44108	-0.191371	0.733999	-0.365245	0.483537
Cst3	ENSRNOG00000005195	2730.44	-0.15661	0.433497	0.171901	0.352492	-0.209273	0.292526	0.119238	0.528305
Slc12a6	ENSRNOG00000005196	6.56247	0.282526	0.570148	-0.295626	0.532879	-0.172244	0.725987	-0.750396	0.122237
LOC100361694	ENSRNOG00000005203	43.299	0.450712	0.468683	0.161741	0.775478	0.216641	0.730598	-0.07233	0.90174
Kcnq3	ENSRNOG00000005206	12.8108	-1.09636	0.290588	-1.05293	0.269782	-0.0467378	0.959146	-0.00331453	0.997288
Spred1	ENSRNOG00000005209	33.7334	-3.04325	0.0462597	0.217939	0.884624	-3.73957	0.00725437	-0.478374	0.728786
Plek	ENSRNOG00000005214	12.1063	-2.30311	0.282219	-0.716483	0.688286	0.671315	0.727022	2.25794	0.266517
Klhl4	ENSRNOG00000005215	1.41369	-0.19059	0.856805	0.11929	0.909375	-1.07178	0.313328	-0.7619	0.449904
Sf3a1	ENSRNOG00000005218	35.7821	1.15829	0.12295	1.25014	0.0773885	-0.188706	0.809163	-0.0968563	0.88866
Hnmt	ENSRNOG00000005223	4.30821	0.290677	0.82691	-1.78332	0.162883	0.842189	0.508869	-1.2318	0.334997
Tfap4	ENSRNOG00000005227	0.867047	-1.22452	0.360732	-1.10938	0.407624	2.36386	0.0911145	2.479	0.059886
Gnptab	ENSRNOG00000005228	10.7846	-0.938017	0.438208	-0.0344109	0.977767	-2.02864	0.0831198	-1.12503	0.328666
Lrrc6	ENSRNOG00000005233	1.11484	-1.08207	0.455642	0.73418	0.591555	-1.43167	0.326305	0.384581	0.778474
Gxylt1	ENSRNOG00000005234	6.14213	-1.36056	0.131691	-0.776233	0.388288	-1.54403	0.0585012	-0.959705	0.257807
Pop1	ENSRNOG00000005243	0.784555	-1.5848	0.31689	-0.306601	0.83671	-1.57077	0.322132	-0.292568	0.843574
LOC100912008	ENSRNOG00000005247	8.7171	-1.2958	0.144271	0.491592	0.498693	0.138715	0.865043	1.92611	0.0270291
Slc1a4	ENSRNOG00000005248	17.059	-0.375207	0.457348	0.699205	0.127721	-0.162364	0.745185	0.912048	0.0664567
Snx6	ENSRNOG00000005249	35.9554	0.762662	0.10526	0.446651	0.278361	0.394819	0.407349	0.078809	0.854877
Zc3h15	ENSRNOG00000005256	174.238	0.400045	0.231601	-0.0984857	0.757562	-0.389493	0.24408	-0.888024	0.00935149
Prkaca	ENSRNOG00000005257	52.036	-0.740266	0.336484	0.393836	0.578437	-0.600804	0.420957	0.533298	0.463213
Myef2	ENSRNOG00000005258	7.03684	0.309956	0.770258	1.55338	0.151706	-1.3929	0.228233	-0.149479	0.882078
Acp1	ENSRNOG00000005260	51.7323	-0.303588	0.507931	0.677872	0.137331	-1.0963	0.0253405	-0.114843	0.790717
Fbxl5	ENSRNOG00000005261	24.4201	0.0591839	0.906104	-0.11813	0.808491	-0.562556	0.264428	-0.73987	0.131695
LOC688906	ENSRNOG00000005263	8.30395	0.099989	0.841901	0.191069	0.673189	0.193448	0.700562	0.284528	0.550934
Sav1	ENSRNOG00000005264	6.03608	-0.274942	0.790528	0.756629	0.459925	-1.28979	0.218529	-0.258215	0.792461
Sycp3	ENSRNOG00000005270	0.971497	-0.485723	0.567724	-0.0216349	0.978479	-0.621973	0.462345	-0.157885	0.844186
Rapgef5	ENSRNOG00000005271	38.9316	0.000978526	0.997851	-0.722626	0.0340152	0.802822	0.0311424	0.0792172	0.818082
Vrk1	ENSRNOG00000005274	23.5445	0.0949932	0.938167	1.12194	0.304448	0.0936637	0.94098	1.12061	0.339906
Csnk2a1	ENSRNOG00000005276	18.1179	-0.186489	0.772747	0.348451	0.531192	0.397843	0.534861	0.932783	0.13761
Trhde	ENSRNOG00000005278	3.31286	0.312175	0.747341	1.44329	0.128213	-0.985579	0.339113	0.14553	0.874275
Ndufaf7	ENSRNOG00000005279	54.6314	1.00692	0.268021	-1.04343	0.222901	0.899737	0.316238	-1.15061	0.185315
Stx16	ENSRNOG00000005281	37.1908	0.0502593	0.920286	-0.405534	0.3061	1.75175	0.00166048	1.29596	0.0116747
Itpka	ENSRNOG00000005284	215.178	-0.194099	0.684887	0.0435542	0.918861	0.262226	0.577037	0.499879	0.276699
Fbxo33	ENSRNOG00000005285	20.4544	0.129867	0.75423	-0.629235	0.122928	-0.0328286	0.935043	-0.791931	0.0554524
Coch	ENSRNOG00000005286	2.05011	1.14168	0.192567	0.975761	0.255313	-0.825436	0.365455	-0.99136	0.231745
Ywhae	ENSRNOG00000005290	772.548	0.440522	0.127718	-0.195164	0.456625	0.206464	0.465619	-0.429222	0.118268
Slc38a1	ENSRNOG00000005291	19.0904	0.309663	0.771	-0.488489	0.615557	0.413863	0.694474	-0.384289	0.703452
Trip11	ENSRNOG00000005292	2.33815	-0.221361	0.866348	-0.666426	0.625242	-1.48795	0.234986	-1.93301	0.132197
Zfp513	ENSRNOG00000005298	3.54905	0.329419	0.717719	-0.524481	0.512988	1.04737	0.250309	0.193465	0.822317
Kif5a	ENSRNOG00000005299	578.756	-0.137915	0.678258	-0.0206509	0.942391	0.464783	0.162714	0.582047	0.0755035
Eif2b4	ENSRNOG00000005301	24.7043	-0.725471	0.462339	1.1378	0.237599	-1.42687	0.154926	0.436401	0.639686
Tbc1d25	ENSRNOG00000005303	4.76452	0.0521104	0.964945	-1.68702	0.138012	0.882661	0.427305	-0.856473	0.451055
Slc4a10	ENSRNOG00000005307	21.6829	0.107557	0.759126	-0.00856446	0.979745	-0.471049	0.186808	-0.58717	0.0894057
Tmx2	ENSRNOG00000005308	47.5616	-2.00771	0.00406613	0.917972	0.123166	-1.68969	0.00849683	1.23599	0.0478066
Scn8a	ENSRNOG00000005309	17.2488	-1.07966	0.17859	0.439203	0.570978	-1.64778	0.0391354	-0.128918	0.862305
Cul1	ENSRNOG00000005310	89.2103	-0.366421	0.199691	0.171042	0.536615	-1.04909	0.00106528	-0.511625	0.0652593
Syne2	ENSRNOG00000005323	0.834827	-1.3044	0.0844509	0.406609	0.548661	-0.945977	0.176929	0.765036	0.275113
Cnrip1	ENSRNOG00000005326	150.055	0.350423	0.317663	-0.15331	0.629159	0.332658	0.34177	-0.171075	0.603322
Crebbp	ENSRNOG00000005330	11.4137	-0.648915	0.168993	-0.187581	0.664322	-0.380601	0.388808	0.0807324	0.853415
Vapb	ENSRNOG00000005331	11.66	-0.68079	0.443297	-0.469083	0.576059	-0.512809	0.538974	-0.301101	0.719608
Csdc2	ENSRNOG00000005332	17.4223	0.422025	0.695087	-0.624013	0.523889	0.658907	0.534916	-0.387131	0.704445
Azin1	ENSRNOG00000005333	42.8466	0.0960061	0.818967	0.0759966	0.847916	-0.352617	0.402126	-0.372627	0.354343
Acvr2a	ENSRNOG00000005334	13.2684	-0.0856863	0.913786	1.20015	0.122779	-0.850696	0.305879	0.435144	0.564182
Galnt13	ENSRNOG00000005335	4.74435	-0.383748	0.726124	-0.936098	0.36002	0.219375	0.831077	-0.332974	0.749029
Rassf5	ENSRNOG00000005342	14.4479	0.0915617	0.856096	-0.743608	0.118458	0.527924	0.286783	-0.307245	0.523326
Nol10	ENSRNOG00000005344	9.58108	-0.768174	0.366817	0.800165	0.284013	-0.359602	0.660697	1.20874	0.140838
Vsnl1	ENSRNOG00000005345	326.905	-0.0966707	0.825617	0.490406	0.236139	-0.294249	0.505031	0.292828	0.484249
Tmem128	ENSRNOG00000005346	41.0799	0.151837	0.776958	-0.475937	0.342877	0.291656	0.578829	-0.336118	0.510627
Fjx1	ENSRNOG00000005347	13.2603	0.148887	0.921881	2.86542	0.0833525	-2.48422	0.153294	0.23231	0.872238
Pamr1	ENSRNOG00000005348	14.7299	-0.518792	0.523367	-1.38108	0.0618883	0.963054	0.199077	0.100766	0.895686
Pwp1	ENSRNOG00000005350	25.2151	-1.20035	0.201803	-1.28043	0.124493	0.505606	0.538525	0.425528	0.628308
Rybp	ENSRNOG00000005353	17.8561	0.305058	0.645277	0.679799	0.304213	-1.01438	0.144702	-0.639638	0.313993
Ncstn	ENSRNOG00000005355	16.3998	1.59959	0.0480426	-0.335214	0.616947	1.47777	0.0793683	-0.45704	0.531571
Ctc1	ENSRNOG00000005357	9.48182	-0.53971	0.505052	-0.663754	0.366465	0.347237	0.648965	0.223193	0.770441
Pmm1	ENSRNOG00000005358	26.7493	0.611291	0.399326	0.247643	0.723451	-0.469934	0.524203	-0.833583	0.230315
Csrnp3	ENSRNOG00000005359	20.5493	-1.38441	0.0298186	0.0804871	0.878163	-0.389918	0.482075	1.07498	0.0698883
Dhrs7b	ENSRNOG00000005360	28.1971	0.453075	0.528586	0.177814	0.794393	-0.221763	0.761317	-0.497024	0.46708
Rab3ip	ENSRNOG00000005362	15.6824	-0.549749	0.334656	-0.0261306	0.961041	-0.636559	0.246106	-0.112941	0.832698
Kcnip1	ENSRNOG00000005365	38.2278	0.145355	0.81755	0.300957	0.579233	0.663735	0.301155	0.819337	0.179128
Kcnj3	ENSRNOG00000005369	4.73126	-1.26478	0.374581	-0.16932	0.903434	-1.54436	0.249322	-0.448896	0.737802
Klhl29	ENSRNOG00000005371	5.56587	0.0492207	0.941628	-0.0747211	0.902064	0.240401	0.717173	0.116459	0.85502
Lyar	ENSRNOG00000005374	10.5171	0.983485	0.350304	0.0148541	0.988923	-0.997017	0.35567	-1.96565	0.0573635
RGD1564053	ENSRNOG00000005375	4.72146	0.746922	0.447194	0.682207	0.500954	-1.43871	0.167602	-1.50343	0.11513
Mad2l1	ENSRNOG00000005376	0.594839	-1.18986	0.27769	-0.78545	0.453595	0.194834	0.859891	0.599248	0.560042
Tmem11	ENSRNOG00000005377	23.158	0.917966	0.0787903	0.649407	0.192852	-0.46629	0.380565	-0.734848	0.133909
Gna15	ENSRNOG00000005378	0.913487	-1.21519	0.371042	-0.0737088	0.953875	-0.03701	0.977992	1.10447	0.391031
Kitlg	ENSRNOG00000005386	3.5393	0.232115	0.727382	0.484828	0.463801	-0.923532	0.182149	-0.670819	0.294329
Rbm3	ENSRNOG00000005387	11.2558	-0.920865	0.118502	-0.50074	0.350789	-0.413449	0.439814	0.00667577	0.990185
Rassf3	ENSRNOG00000005388	6.3727	-0.932974	0.265864	0.268653	0.704317	0.116084	0.881974	1.31771	0.10335
Ppp2ca	ENSRNOG00000005389	29.3609	-0.318857	0.537498	-0.0767195	0.875403	-0.499512	0.323311	-0.257375	0.599504
Nup210	ENSRNOG00000005390	9.212	-1.86853	0.0263402	-0.13397	0.859117	-1.48597	0.0487746	0.248593	0.740299
Prex2	ENSRNOG00000005391	5.64074	-2.53324	0.175905	0.380777	0.827757	-2.28457	0.170945	0.629448	0.718509
Sertad2	ENSRNOG00000005393	3.87603	0.17824	0.846619	0.857491	0.276892	0.793857	0.396253	1.47311	0.102278
Maea	ENSRNOG00000005397	42.6399	-0.35313	0.575855	0.327051	0.559039	0.0409052	0.94705	0.721086	0.234728
Rasgrp1	ENSRNOG00000005404	8.18598	-0.578174	0.535888	-0.261465	0.765235	-0.434483	0.623002	-0.117774	0.89389
Clint1	ENSRNOG00000005406	22.3977	1.25927	0.15847	-0.0590416	0.943614	0.0628113	0.944195	-1.2555	0.139579
LOC100911674	ENSRNOG00000005408	4.53788	-0.483509	0.535696	0.163306	0.805527	0.46029	0.542473	1.1071	0.142977
Aftph	ENSRNOG00000005411	13.2697	-0.0947596	0.887403	1.27626	0.0534044	-0.88325	0.209281	0.487775	0.44598
Trap1	ENSRNOG00000005418	49.1614	1.19409	0.09956	-0.403816	0.540785	0.589502	0.415267	-1.0084	0.139836
Odc1	ENSRNOG00000005424	14.5313	-0.63365	0.210707	0.013359	0.978114	-1.08263	0.0334075	-0.435621	0.359669
Snupn	ENSRNOG00000005426	4.86511	-0.342166	0.778942	-0.911744	0.42765	0.229843	0.844048	-0.339735	0.769139
Ctbp1	ENSRNOG00000005428	486.467	0.557279	0.120287	0.00777871	0.980778	0.139853	0.692414	-0.409647	0.22276
AABR07040944.1	ENSRNOG00000005430	0.28521	0.738842	0.405275	0.50959	0.538069	-0.506621	0.559513	-0.735873	0.382756
Shq1	ENSRNOG00000005433	1.032	-2.18424	0.176664	0.249686	0.867383	-2.41222	0.13996	0.0217096	0.988422
Sptbn1	ENSRNOG00000005434	69.612	-0.926017	0.230672	-0.0158969	0.982689	-1.06218	0.152404	-0.152059	0.832725
Hrsp12	ENSRNOG00000005437	17.9989	-0.0597375	0.956133	2.14904	0.0598274	-2.12979	0.0764231	0.0789882	0.93893
Pcsk2	ENSRNOG00000005438	51.8395	0.107309	0.726236	0.191925	0.517604	-0.541067	0.0903124	-0.456451	0.127589
Gna11	ENSRNOG00000005446	9.95907	-1.18278	0.259998	-0.766856	0.399481	0.302778	0.745078	0.718705	0.467259
LOC100364791	ENSRNOG00000005447	1.26534	-0.593771	0.707662	0.336077	0.820887	-1.71109	0.283024	-0.781246	0.603627
Lamp5	ENSRNOG00000005457	35.6494	0.221865	0.64637	-0.715863	0.123124	0.35958	0.448042	-0.578148	0.215874
Lgalsl	ENSRNOG00000005464	64.6623	-0.669611	0.140672	0.0722339	0.860988	-0.526113	0.224928	0.215732	0.607818
Rbm28	ENSRNOG00000005468	11.3759	0.438633	0.536348	0.195275	0.764091	0.106774	0.882158	-0.136584	0.838413
Atxn3	ENSRNOG00000005470	1.53564	-0.186849	0.89663	-1.76566	0.195542	0.672853	0.625048	-0.90596	0.509478
Fkbp9	ENSRNOG00000005478	11.7982	-0.819057	0.383487	1.07296	0.192478	-0.328078	0.719489	1.56394	0.0875974
Slc1a2	ENSRNOG00000005479	24.4804	0.178405	0.858329	-1.39426	0.135165	0.955614	0.31147	-0.617048	0.51806
Ybx3	ENSRNOG00000005480	14.4518	-0.702756	0.54656	-0.329112	0.788043	-1.80261	0.112167	-1.42897	0.20178
Sap30bp	ENSRNOG00000005482	15.5872	0.626757	0.425554	-0.16548	0.812756	0.754204	0.347736	-0.0380326	0.958954
Rpap1	ENSRNOG00000005483	2.76537	-0.239268	0.827872	-0.226586	0.819658	0.28082	0.79151	0.293502	0.778616
AABR07058267.1	ENSRNOG00000005486	14.3742	0.335541	0.823	1.03755	0.442736	0.397932	0.794352	1.09994	0.442353
Best3	ENSRNOG00000005491	2.02938	-0.412283	0.543004	-0.573086	0.363316	0.0538124	0.933174	-0.10699	0.867374
Hpcal1	ENSRNOG00000005492	71.2244	0.333569	0.555231	0.504489	0.340142	-0.0744829	0.897013	0.0964368	0.856732
Ing3	ENSRNOG00000005496	12.6946	-0.00893656	0.992315	0.312135	0.702357	0.296225	0.747259	0.617296	0.484982
Ankib1	ENSRNOG00000005502	5.74015	-0.942315	0.206528	0.250327	0.713027	-0.642964	0.363787	0.549678	0.431567
Pkp4	ENSRNOG00000005504	21.4528	-0.210639	0.709556	-0.130837	0.797955	0.193798	0.726128	0.2736	0.610422
Pak7	ENSRNOG00000005509	37.2811	0.426774	0.301961	-0.529469	0.146399	1.07833	0.0142581	0.122086	0.751779
Ndufa4	ENSRNOG00000005512	734.544	-0.144998	0.641523	-0.157077	0.587053	-0.103096	0.733345	-0.115175	0.696474
Srsf5	ENSRNOG00000005513	84.2431	0.175875	0.677794	-0.678106	0.106113	-0.040322	0.921932	-0.894303	0.0357278
Rhbdl3	ENSRNOG00000005515	5.09832	-1.01473	0.33959	1.093	0.265703	-0.967963	0.355567	1.13977	0.26035
Grm3	ENSRNOG00000005519	42.3062	0.316005	0.467673	-0.47237	0.23503	0.622069	0.155838	-0.166306	0.685293
Sh3yl1	ENSRNOG00000005522	4.78271	-0.430301	0.708993	2.23864	0.0571923	-2.20929	0.0736513	0.459653	0.674504
Pno1	ENSRNOG00000005524	12.4459	-1.77879	0.106442	0.0740939	0.942433	-1.54371	0.127424	0.30917	0.76026
Tbk1	ENSRNOG00000005528	13.3791	0.260565	0.699768	0.86972	0.181007	-0.536681	0.445529	0.0724738	0.909875
Rps6kl1	ENSRNOG00000005530	6.26137	0.199601	0.865064	2.1605	0.0570624	-0.730885	0.558031	1.23002	0.277859
Psmd11	ENSRNOG00000005538	31.1359	0.177521	0.66229	-0.42814	0.252339	0.511444	0.210123	-0.0942166	0.80649
Thg1l	ENSRNOG00000005539	3.53268	-1.55642	0.0674758	-1.16636	0.108216	0.539066	0.452971	0.929131	0.239285
AABR07057196.1	ENSRNOG00000005546	2.65854	-3.38019	0.00391336	-0.611957	0.54689	-1.28178	0.197236	1.48645	0.145296
Lrfn5	ENSRNOG00000005550	92.6902	-0.284656	0.769016	0.687547	0.478574	-1.41806	0.154551	-0.445857	0.628085
Derl1	ENSRNOG00000005551	71.695	0.0387546	0.925483	-0.05096	0.893471	0.0896582	0.827214	-5.6308e-05	0.999886
Snrpf	ENSRNOG00000005556	17.7219	0.411714	0.539887	0.142587	0.820563	-0.153552	0.820602	-0.422678	0.507494
LOC100125367	ENSRNOG00000005558	1.45643	-1.16112	0.434048	0.650552	0.642634	-2.41111	0.106929	-0.59944	0.668579
Brinp1	ENSRNOG00000005561	50.7692	-0.496936	0.506778	-0.184526	0.781802	0.10647	0.881223	0.418881	0.554615
Ubn2	ENSRNOG00000005564	17.5539	-0.505126	0.222131	0.312483	0.417937	-0.688038	0.095848	0.129572	0.736651
Pcnxl4	ENSRNOG00000005568	10.7674	-1.09467	0.0492177	-0.154498	0.752909	-0.614771	0.223029	0.325401	0.518982
Phospho1	ENSRNOG00000005569	3.09992	-0.310684	0.847412	-1.68729	0.239738	1.44512	0.340659	0.0685129	0.964305
Ntn4	ENSRNOG00000005573	0.426264	0.108357	0.928906	-1.92751	0.1239	2.84908	0.0306088	0.813206	0.482683
Adamts8	ENSRNOG00000005574	1.6088	1.31506	0.371511	-0.176527	0.89984	0.224442	0.879406	-1.26715	0.364233
Abi3	ENSRNOG00000005575	0.246967	-1.08533	0.316707	-1.68629	0.120694	1.18593	0.292823	0.58498	0.566008
Rpia	ENSRNOG00000005576	6.19102	0.759703	0.418452	0.851237	0.306691	0.535985	0.582528	0.627519	0.4798
Desi1	ENSRNOG00000005577	11.4333	-1.82256	0.0818875	-1.39597	0.108777	0.657816	0.444882	1.08441	0.266171
Zbtb44	ENSRNOG00000005578	1.5233	-1.16467	0.380422	-0.467247	0.698508	0.0036483	0.997674	0.701068	0.575761
Suclg1	ENSRNOG00000005587	183.875	-0.0148014	0.972018	-0.20486	0.609361	-0.296604	0.475724	-0.486663	0.23318
Dhrs7	ENSRNOG00000005589	14.8566	-0.637196	0.376775	-0.611279	0.362131	-0.14977	0.823187	-0.123853	0.85512
Brinp2	ENSRNOG00000005592	65.0553	-0.21369	0.598002	0.676816	0.0853828	-0.647751	0.12297	0.242754	0.528427
Nr4a2	ENSRNOG00000005600	12.8208	0.946811	0.318367	-0.858919	0.257398	1.9574	0.0483543	0.151675	0.863073
Mthfd1	ENSRNOG00000005602	8.32836	2.27365	0.0394796	-0.317806	0.748841	0.716154	0.520395	-1.87531	0.0702369
Med1	ENSRNOG00000005606	5.48401	0.154643	0.800635	-0.249036	0.679009	-0.438027	0.472168	-0.841706	0.157975
Neurod1	ENSRNOG00000005609	4.08481	1.58878	0.124853	0.0528418	0.956584	0.114751	0.913287	-1.42118	0.146978
Yipf4	ENSRNOG00000005610	22.6317	-0.390945	0.388252	-0.21747	0.61377	-0.499127	0.258196	-0.325652	0.447924
Txn2	ENSRNOG00000005614	90.8675	-0.131747	0.877085	1.5331	0.0732159	-1.13719	0.21403	0.527658	0.516646
Gadd45a	ENSRNOG00000005615	1.72772	-0.193209	0.871458	-1.68938	0.141978	2.15763	0.075405	0.661465	0.561047
Ncoa3	ENSRNOG00000005616	0.920523	-1.56945	0.274508	-0.376686	0.786523	-2.71702	0.0590069	-1.52426	0.26358
Fmc1	ENSRNOG00000005618	17.1824	0.32399	0.539577	-0.385685	0.42148	0.490559	0.350666	-0.219116	0.660817
RGD1310262	ENSRNOG00000005619	0.698938	0.460076	0.736357	-1.17246	0.384745	1.55255	0.267817	-0.0799906	0.950707
Ankmy2	ENSRNOG00000005623	29.1754	0.144202	0.758295	-0.729721	0.109968	0.170945	0.706774	-0.702978	0.125375
Zfx	ENSRNOG00000005624	2.3296	-0.292219	0.713799	0.0671122	0.927125	-0.195559	0.802524	0.163773	0.82824
AABR07060778.1	ENSRNOG00000005630	0.417835	-0.421628	0.637866	0.688546	0.417226	-1.09155	0.230175	0.0186276	0.982459
Zbtb49	ENSRNOG00000005633	1.47507	-1.50182	0.133328	-0.406525	0.620973	1.7169	0.0823544	2.8122	0.00577335
Lingo2	ENSRNOG00000005634	83.6056	0.870181	0.194827	-1.05121	0.102448	0.675825	0.302059	-1.24557	0.0569149
Fbxl4	ENSRNOG00000005641	5.40898	-0.812601	0.262736	0.179246	0.805789	-1.83474	0.0136524	-0.842894	0.221346
Frs2	ENSRNOG00000005642	6.9927	-0.50776	0.363995	1.0327	0.0548319	-0.681333	0.230064	0.859123	0.113511
Cntn4	ENSRNOG00000005652	8.29922	-0.537316	0.436095	-0.714987	0.290366	-0.592001	0.357161	-0.769673	0.245543
Aurkb	ENSRNOG00000005659	1.76411	-0.356115	0.631945	0.32788	0.637405	-0.547	0.456081	0.136995	0.845613
Grm7	ENSRNOG00000005662	8.94051	-1.08867	0.275869	-1.62013	0.0982831	-0.0665432	0.937988	-0.597999	0.52749
AABR07041481.1	ENSRNOG00000005665	2.3146	0.88651	0.535277	-0.37935	0.790669	2.54086	0.0850718	1.275	0.349709
Astn1	ENSRNOG00000005667	23.7235	-0.17699	0.810066	0.192026	0.778039	-0.261989	0.719455	0.107026	0.878161
Ndufa8	ENSRNOG00000005668	92.3774	-0.258639	0.56124	-0.0704391	0.854289	0.552961	0.209083	0.741161	0.0891899
Car8	ENSRNOG00000005669	5.41823	-0.174572	0.874106	-0.813596	0.452681	-0.382111	0.718734	-1.02113	0.334735
Runx1t1	ENSRNOG00000005673	34.641	-0.0708602	0.88077	-0.51962	0.250559	0.0278531	0.951447	-0.420907	0.353378
Lamb1	ENSRNOG00000005678	8.62054	-0.561778	0.612181	0.590649	0.549779	-0.424565	0.695812	0.727863	0.489363
AABR07042323.1	ENSRNOG00000005681	0.293873	-0.12215	0.886791	-0.818133	0.329536	0.513385	0.558731	-0.182598	0.822581
Suclg2	ENSRNOG00000005686	10.4279	0.369814	0.6312	-0.167377	0.808471	0.454234	0.558074	-0.0829571	0.909256
Yeats4	ENSRNOG00000005689	23.6948	0.50048	0.36316	0.134601	0.79626	-0.250795	0.650569	-0.616673	0.241109
Lmcd1	ENSRNOG00000005690	1.77152	-0.517767	0.714498	-0.407433	0.761999	-0.874558	0.533454	-0.764224	0.570255
Rnf32	ENSRNOG00000005691	1.95713	2.61319	0.0728525	-0.498132	0.714853	1.36128	0.336128	-1.75004	0.195671
Slc6a11	ENSRNOG00000005697	3.81748	-0.747649	0.708593	-0.742119	0.691021	1.70415	0.391624	1.70968	0.371901
[truncated: 10,570 more rows]
