# Supplementary material for: Adolescent exposure to Δ9-tetrahydrocannabinol alters the transcriptional trajectory and dendritic architecture of prefrontal pyramidal neurons
Source: Mol Psychiatry. 2018 Oct 3;24(4):588–600. doi: 10.1038/s41380-018-0243-x (PMC6430678; doi:10.1038/s41380-018-0243-x)
Supplement: Supplementary file 5 — Supplementary Table 3 [file 41380_2018_243_MOESM5_ESM.xlsx]

## Sheet: Sheet1
Gene Name	RefSeq ID	Ensembl ID	VEH;24hrs;Mean	VEH;24hrs;Error	THC;24hrs;Mean	THC;24hrs;Error	VEH;2wks;Mean	VEH;2wks;Error	THC;2wks;Mean	THC;2wks;Error
Ahsa1	NM_001115034.1	ENSRNOG00000048981	0.153536	0.0217779	0.177721	0.0582002	0.296694	0.0532904	0.282609	0.0322513
Aimp1	NM_053757.1	ENSRNOG00000011384	0.21697	0.0280507	0.483253	0.142452	0.182551	0.00886026	0.109614	0.0163977
Arhgef2	NM_001012079.1	ENSRNOG00000020027	0.642973	0.121036	1.38775	0.346496	0.872677	0.15106	0.77017	0.0809192
Arpc4	NM_001106615.2	ENSRNOG00000008994	0.474082	0.0765472	0.777101	0.364186	0.926	0.226704	0.997656	0.119893
Baiap2	NM_057196.1	ENSRNOG00000004049	0.249244	0.0472861	0.500538	0.362871	0.516216	0.176954	0.5004	0.10635
Bap1	NM_001107292.1	ENSRNOG00000019097	0.202329	0.0260715	0.16326	0.0420748	0.186717	0.0404402	0.3292	0.0407332
Capza2	NM_001009180.2	ENSRNOG00000056207	0.26733	0.0406026	0.464472	0.171074	0.166741	0.0247917	0.149233	0.0259346
Cd81	NM_013087.1	ENSRNOG00000020451	0.248949	0.0340077	0.534632	0.20319	0.361489	0.05122	0.317513	0.0320631
Cdc26	NM_001013240.2	ENSRNOG00000029785	0.211836	0.0484839	0.0826403	0.0237799	0.1398	0.0405142	0.222974	0.0544312
Cltc	NM_019299.1	ENSRNOG00000004291	0.69082	0.0174479	0.944722	0.232941	0.609554	0.0743413	0.609996	0.0667073
Clu	NM_053021.2	ENSRNOG00000016460	0.325187	0.0478321	0.266955	0.0554872	0.305799	0.0528408	0.51144	0.0563865
Cnp	NM_012809.1	ENSRNOG00000017496	0.19899	0.0448388	0.338463	0.0981411	0.54797	0.113835	0.31687	0.112439
Dnaja2	NM_032079.2	ENSRNOG00000016251	0.246285	0.0420925	0.323334	0.0938165	0.165921	0.0245073	0.184174	0.0251373
Dstn	NM_001033666.1	ENSRNOG00000005924	0.648991	0.0346822	1.11077	0.301903	0.540329	0.127006	0.539543	0.11922
Dync1i2	NM_001270625.1	ENSRNOG00000009781	0.0399101	0.00682798	0.160471	0.0716624	0.0930496	0.0186372	0.0418904	0.0126885
Eif2s2	NM_199380.1	ENSRNOG00000017447	0.125389	0.0253842	0.175276	0.0588799	0.115913	0.0210226	0.0741233	0.0119379
Eif4g3	NM_001106693.1	ENSRNOG00000014368	0.270654	0.022166	0.437476	0.147412	0.211824	0.0323207	0.211805	0.0290402
Eif5a	NM_001033681.1	ENSRNOG00000016478	0.106756	0.0159146	0.194481	0.0548385	0.269386	0.0877587	0.186551	0.0526353
Fis1	NM_001105919.1	ENSRNOG00000001420	0.280865	0.0981262	0.360608	0.117277	0.63689	0.112766	0.262592	0.0471909
Fyn	NM_012755.1	ENSRNOG00000000596	0.0393902	0.0159782	0.0352888	0.00762773	0.126424	0.0221734	0.107774	0.0336832
Gprasp1	NM_134386.1	ENSRNOG00000049985	2.3086	0.389525	2.6742	0.89769	1.13744	0.255191	1.16608	0.282804
Ifi27	NM_203410.1	ENSRNOG00000009263	0.0031194	0.000618744	0.0202587	0.0106149	0.0222757	0.0107659	0.0143426	0.00601253
Itm2c	NM_001009674.1	ENSRNOG00000017359	3.6007	0.67423	3.76356	0.786596	3.3793	0.738866	4.39558	0.526381
Nptx1	NM_153735.1	ENSRNOG00000003741	1.67641	0.10569	1.64098	0.251672	1.63945	0.24424	1.99158	0.189998
Nsg2	NM_001034152.1	ENSRNOG00000020644	0.469057	0.0689098	0.666144	0.180081	0.922325	0.206096	0.864179	0.136877
Nsmf	NM_057190.2	ENSRNOG00000008810	0.130357	0.0381232	0.167881	0.0406025	0.286482	0.102497	0.399782	0.0693598
Pacsin1	NM_017294.1	ENSRNOG00000054603	0.124155	0.0454647	0.0687389	0.0309022	0.179045	0.047857	0.177054	0.0421809
Pcp4	NM_013002.2	ENSRNOG00000001628	0.0166215	0.00440019	0.240866	0.216345	0.0139876	0.00273958	0.012074	0.00256226
Pebp1	NM_017236.1	ENSRNOG00000001136	0.999408	0.0682703	1.14851	0.0423871	2.03176	0.283542	2.13438	0.214602
Pgrmc1	NM_021766.1	ENSRNOG00000012786	0.182616	0.0353952	0.304127	0.0924419	0.241095	0.0620666	0.2085	0.0319579
Polr2g	NM_053948.4	ENSRNOG00000019439	0.63742	0.105803	0.518385	0.163178	0.605989	0.0960797	0.572466	0.213327
Ppp1cc	NM_001270983.1	ENSRNOG00000001269	1.5255	0.125735	1.46902	0.274839	1.56446	0.186075	1.65163	0.139859
Psmb2	NM_017284.1	ENSRNOG00000011463	0.132896	0.0367061	0.165605	0.0654785	0.274474	0.0761108	1.17866	0.725874
Psmb5	NM_001105727.2	ENSRNOG00000013386	0.495161	0.0759547	0.696223	0.136943	0.506549	0.100007	0.579645	0.0901198
Ptn	NM_017066.2	ENSRNOG00000011946	0.17483	0.0122182	0.36472	0.159465	0.160789	0.0265148	0.142505	0.0208502
Ptprj	NM_017269.2	ENSRNOG00000034025	0.15132	0.0189799	0.258225	0.0984088	0.0996017	0.0132173	0.1128	0.0114884
Rbbp7	NM_031816.1	ENSRNOG00000005157	0.679531	0.0829737	1.42235	0.538106	0.49339	0.102007	0.453225	0.0860962
Rpl18a	NM_212510.2	ENSRNOG00000018795	0.0577584	0.0125644	0.07862	0.0218442	0.291921	0.0656979	0.180766	0.0210976
Rtf1	NM_001108958.1	ENSRNOG00000005183	0.192681	0.0698375	0.168784	0.0779246	0.28709	0.112012	0.268961	0.128673
Snap25	NM_030991.3	ENSRNOG00000006037	1.90403	0.296629	3.0763	0.746753	1.28981	0.272654	1.0143	0.214005
Sqstm1	NM_181550.1	ENSRNOG00000003147	0.191761	0.0740843	0.134939	0.0644203	0.0482693	0.0200917	0.233681	0.127785
Stam	NM_001109121.2	ENSRNOG00000060817	0.435216	0.0522321	1.31892	0.849774	0.425582	0.0903256	0.364282	0.0376605
Stau2	NM_001007150.1	ENSRNOG00000042458	0.240039	0.0636668	1.93126	1.26026	0.321294	0.0847154	0.374377	0.189282
Stmn1	NM_017166.1	ENSRNOG00000016810	1.29076	0.127774	1.78357	0.359561	0.858283	0.0589008	1.09273	0.194529
Vps39	NM_001012186.2	ENSRNOG00000008316	0.270868	0.0141884	0.40498	0.132557	0.34697	0.0367494	0.303014	0.0273729
Wasf1	NM_001025114.1	ENSRNOG00000047476	0.259862	0.0108743	0.419943	0.11815	0.27671	0.0337906	0.234758	0.0155925
Wasl	NM_001110365.1	ENSRNOG00000006975	0.838025	0.0738035	1.90968	0.980659	0.652947	0.178794	0.518293	0.0284499
Zc3h15	NM_001010963.1	ENSRNOG00000005256	0.471502	0.0333695	0.881137	0.304838	0.382178	0.0686264	0.330457	0.0843676
Actb	NM_031144.3	ENSRNOG00000034254	0.507406	0.0403671	0.492409	0.0319407	0.622114	0.0642367	0.559084	0.0565098
Gapdh	NM_017008.4	ENSRNOG00000018630	2.00546	0.145624	2.05609	0.129153	1.66991	0.20307	1.882	0.232905
