# Supplementary material for: Adolescent exposure to Δ9-tetrahydrocannabinol alters the transcriptional trajectory and dendritic architecture of prefrontal pyramidal neurons
Source: Mol Psychiatry. 2018 Oct 3;24(4):588–600. doi: 10.1038/s41380-018-0243-x (PMC6430678; doi:10.1038/s41380-018-0243-x)
Supplement: Supplementary file 6 — Supplementary Table 6 [file 41380_2018_243_MOESM6_ESM.xlsx]

## Sheet: TableS5-CMC-THC.OR
Development	Scz-black	Scz-blue	Scz-brown	Scz-coral	Scz-cyan	Scz-green	Scz-greenyellow	Scz-grey	Scz-grey60	Scz-ivory	Scz-lightcyan	Scz-lightgreen	Scz-lightyellow	Scz-magenta	Scz-midnightblue	Scz-peru	Scz-pink	Scz-purple	Scz-red	Scz-salmon	Scz-sienna	Scz-tan	Scz-turquoise	Scz-yellow
VEH-Development.DGE	0.74	1.13	0.51	0.33	1.51	1.34	1.36	0.79	2.13*	0.62	0.84	0.95	1.69	0.76	1.41	0	0.96	0.67	1.48	0.43	1.07	1.6	0.96	1.31
THC-Development.DGE	1.02	1.47*	0.58	0.27	1.82*	0.98	0.71	0.75	0.54	0.76	0.33	1.19	0.26	1.03	0.84	1.14	1.21	1.46	1.92***	1.35	0.57	1.57*	1.42**	1.43*
orangered4	1.33	1.08	0.38	0	1.01	0	1.74	0.81	0	3.11	0	2.34	1.59	1.46	0.83	7.06*	1	3.04*	1.33	1.29	3.52	0	1.26	1.99*
purple	0.5	0.87	0.21	1.91	2.7***	1.87*	1.15	0.65	1.21	1.74	1.38	2.16*	1.43	0.75	0.36	0.73	1.53	1.11	2.38***	1.68*	0.37	1.84*	0.88	0.89
skyblue3	0.3	0.84	0.54	0	3.51**	2.8*	2.05	0.75	1.01	2.91	0	3.35	3.05	1.36	1.58	0	0.31	0.38	2.24*	0.8	1.61	0.87	0.98	1.21
tan	0.3	1.75*	0.45	1.57	1.19	1.08	0.79	0.71	2.08	0.7	0	0.53	0.73	2.26**	1.17	0	0.61	1.37	1.24	1.42	0.79	0.21	1.43*	1.2
darkturquoise	0.84	1.4	0.74	0	1.3	0.36	1.09	0.95	0	0	0	0.73	2.05	0.73	0.53	0	0.63	0.52	0.84	0.81	1.09	0.59	1.31	1.38
lightcyan1	1.39	1.81	0.54	0	1.42	1.62	0	0.49	0	0	2.88	3.29	0	0.79	0	0	1.89	0.57	0.45	0.59	2.41	1.3	0.25	0.29
darkgreen	0.61	1.13	0.86	4.41*	0.63	0.35	1.63	0.96	2.08	0	0	0.72	0	0.71	0	2.11	1.26	0.77	1.03	1.64	1.07	1.79	1.08	0.52
orange	0.87	1.32	0.25	2.23	0.66	1.54	1.13	0.7	2.19	1	0	0	0	0.95	1.1	2.22	0.87	1.38	0.64	0.84	1.13	1.56	1.28	0.98
violet	0.86	1.26	0.33	1.45	0.43	1	0.74	1.1	0.94	1.32	0	1	0	1.52	1.46	6.12*	1.47	1.08	1.45	0.74	1.49	0.4	0.73	1.11
lightyellow	0.79	0.86	0.7	1	2.21*	1.4	1.57	0.73	0.64	0	1.23	1.4	0.95	0.51	0.5	0	1.21	1.52	1.84	1.57	0	0.55	0.97	1.43
white	0.65	0.96	0.51	0	1.72	0.38	0.85	0.9	0	0	0	2.37	0	1.16	0.55	4.67	0.44	1.99	0.65	1.15	0	0.93	1.83**	1.29
cyan	0.82	0.8	0.88	0.82	1.28	2.08	0.42	0.75	1.08	0.75	0	3.67**	0.79	0.86	0	0	0.66	1.47	1.51	2.23*	3.61*	1.92	1.32	1.29
steelblue	0.55	1.23	0.49	0	0.86	0.98	1.09	0.96	0.92	2.63	0	3.03	0	0.73	2.17	2.88	1.43	0.34	1.12	0	1.46	1.61	1.42	1.87
black	0.47	0.98	0.41	1.21	1.31	0.83	0.93	1.09	0.39	1.68	0.74	0.83	0.57	0.94	1.22	0	1.09	1.06	1.21	1.43	1.25	0.33	0.86	1.34
turquoise	0.42	0.91	0.44	1.32	1.03	0.7	1.13	0.89	0.82	0.56	0.37	1.13	1.08	1.26	0.87	0.3	1	1.47*	1.25	1.23	1.57	1.53*	1.05	1.13
green	0.68	1.07	0.39	0.48	0.74	0.85	0.88	0.9	2.36*	0	0	3.76***	0.46	0.94	0.48	0	1.52	1.24	1.08	1.15	0	1.26	1.55**	1.21
greenyellow	0.83	1.48	0.74	0.69	1.99*	0.72	1.86	0.86	1.38	0.63	0	0.48	1.35	0.97	0.34	1.41	0.55	1.99*	0.69	1.47	3.04*	0.78	1.23	1.47
darkolivegreen	0.58	1.3	0.34	1.49	0.45	1.03	1.15	0.92	0.96	2.77	3.78	1.03	1.42	0.25	0	3.03	1.2	1.11	1.19	1.15	0	0.83	1.21	0.37
red	0.68	1.14	0.47	1.78	0.88	0.8	0.89	0.99	0.37	0	0.71	0.8	2.3	0.9	0.87	1.16	0.81	0.71	1.04	0.9	0	1.15	1.26	1.37
brown	0.55	0.89	0.26	0.76	1.38	1.28	1.76**	0.83	0.49	0.45	0.95	0.89	1.25	1.18	0.63	1.03	2.01***	1.85**	1.74**	1.37	1.07	1.76*	0.78	0.99
midnightblue	0.68	0.83	0.3	2.67	0.78	0.89	1.82	0.79	1.71	0.78	1.06	0	0	0.74	0.43	1.75	0.86	0.86	1.39	2.08*	0	2	0.99	0.88
saddlebrown	0.53	1.02	0.47	0	1.67	0.46	1.4	0.59	3.68*	0	3.43	1.9	0	0.69	2.07	0	2.86**	1.36	1.07	0.34	1.4	2.35*	1.72*	0.86
lightgreen	0.57	0.73	1.16	0.97	1.2	1.72	0.49	0.68	0.63	0	1.2	1.36	0.93	0.67	0.98	0	1.39	0.48	0.57	1.01	0	0	1.32	0.74
pink	0.49	0.95	0.43	0	0.96	2.04*	0.97	0.91	1.24	0	2.41	0.87	0.59	0.87	0.63	0	1.7	1.27	1	1.5	0.64	1.07	0.82	1.05
darkorange	0.65	1.34	0.13	1.1	0.67	0.38	2.36*	0.67	0.71	1	1.36	0.76	2.14	1.56	0.55	0	1.34	0.54	1.1	0.85	4.85*	1.91	1.23	0.7
skyblue	1.06	1.15	0.46	0	1.22	0.45	2.1	0.87	0.86	0	0	0.91	0	1.15	0.66	0	1.34	0.99	1.33	0.34	1.37	0.74	1.68*	1.02
grey	0	0	2.9	0	0	0	0	1.26	0	0	0	0	0	0	0	0	0	0	0	0	0	0	3.02	0
darkmagenta	1.86	1.16	0.71	0	0.46	0	1.18	0.63	0.99	0	0	1.05	0	0.52	2.34	0	0.91	0	1.21	1.18	0	0.85	1.05	0.97
grey60	1.29	1.31	0.42	1.86	1.41	0.31	0.7	0.59	1.2	0	0	1.28	0.87	0.63	0.92	0	0.73	0.68	0.91	1.19	0	1.03	0.94	1.06
yellowgreen	0.3	1.93*	1.11	1.56	0.47	1.08	1.63	0.62	1.01	1.43	0	1.08	0	1.08	1.58	0	1.26	0.38	0.93	0.4	1.61	0.43	1.38	1
lightcyan	0.34	1.05	0.4	1.79	1.08	1.88	1.38	0.86	1.15	1.63	2.22	1.23	1.7	0.76	1.34	0	1.25	1.1	0.52	1.14	2.82	0.24	1.07	1.02
sienna3	0.6	0.99	0.35	3.12	1.4	1.05	1.59	0.99	2.01	1.39	0	2.14	1.46	1.05	0.76	0	0.3	0.37	0.6	2.01	0	0.85	0.77	1.18
darkred	1.69	0.89	0.6	1.03	0.31	0.71	1.63	0.96	1.36	0	2.61	0	0.99	0.53	0.51	0	1.26	1.3	2.37**	0.53	1.07	0.28	0.82	1.35
royalblue	1.03	1.01	0.48	1.03	1.27	0.71	1.62	0.85	1.35	0	1.27	2.2	0.98	1.65	1.04	2.09	0.82	1.57	0.4	1.63	2.17	2.09	0.82	0.65
plum1	0.63	1.41	0.94	1.6	3.05*	1.11	0.4	0.8	0	0	0	0	1.53	2.62*	0	0	0.63	0.79	1.61	1.24	0	1.83	1.01	0.6
darkgrey	1.06	0.8	0.12	0	1.65	0.36	0.27	0.92	2.12	0.97	1.31	1.49	1.01	0.73	1.07	0	0.42	1.06	1.28	0.82	1.09	2.16	0.65	0.53
mediumpurple3	1	1.28	0.99	3.43	0.5	2.38	0.86	0.72	1.09	1.53	2.07	0	1.6	0.28	0	0	0.66	0.41	0.33	0.42	3.55	0.46	0.85	0.63
lightsteelblue1	0.66	0.91	1.42	3.46	0.51	0.58	0	0.73	0	0	0	0	1.61	2.11	0	7.16*	0.33	0	0.33	0	0	0.47	1.5	0.64
ivory	0	0.52	0	0	3.08	1.71	0	0.97	0	0	0	0	0	0	0	0	0	1.22	0	0	0	0	0.83	1.93
blue	1.25	1	0.39	0.67	1.51	0.95	1.55	0.84	2.39*	1.27	1.28	0.46	0.98	1.21	0.68	1.39	0.6	1.5	0.95	0.97	0.7	1.38	1.12	1.66**
paleturquoise	0.56	1.09	0.84	1.44	0	0	0.36	0.79	0.93	1.31	1.78	0	0	2.06*	1.45	0	0.57	1.44	0.56	0.36	0	2.07	1.26	1.7
